# Supplementary material for: Phenome-wide association study of uterine fibroid subtypes reveals symptoms of fibroid severity and subtype-specific comorbidities
Source: Research Square preprint supplement (doi:10.21203/rs.3.rs-9271647/v1), 2026-04-21
Supplement: Supplementary file 1 [file 70abddd3cdf916dfb60f0a49.docx]

**SUPPLEMENTAL FILES**

Supplemental Table 1. Inclusion and exclusion criteria for case and control sets in the Synthetic Derivative.

Supplemental Table 2. ICD and CPT codes used to determine individuals who had a pregnancy recorded in the Synthetic Derivative.

Supplemental Table 3. Bonferroni-corrected significance thresholds for analyses.

Supplemental Table 4. Demographics information and comparative test statistics for discovery and replication datasets.

Supplemental Table 5. Submucosal primary PheWAS results adjusted for age at diagnosis, race, and EHR length.

Supplemental Table 6. Submucosal primary analysis significant associations and their system categories counts.

Supplemental Table 7. Significant obstetric associations with submucosal fibroids of all individuals compared to EHR-recorded pregnancy subset.

Supplemental Table 8. Submucosal White-race stratified PheWAS results adjusted for age at diagnosis and EHR length.

Supplemental Table 9. Submucosal Black-race stratified PheWAS results adjusted for age at diagnosis and EHR length.

Supplemental Table 10. Submucosal Asian-race stratified PheWAS results adjusted for age at diagnosis and EHR length.

Supplemental Table 11. Submucosal subtyped-subset PheWAS results adjusted for age at diagnosis, race, and EHR length.

Supplemental Table 12. Submucosal replication PheWAS in *All of Us* adjusted for age at diagnosis, race, and EHR length.

Supplemental Table 13. Intramural primary PheWAS results adjusted for age at diagnosis, race, and EHR length.

Supplemental Table 14. Intramural primary analysis significant associations and their system categories counts.

Supplemental Table 15. Significant obstetric associations with intramural fibroids of all individuals compared to EHR-recorded pregnancy subset.

Supplemental Table 16. Intramural White-race stratified PheWAS results adjusted for age at diagnosis and EHR length.

Supplemental Table 17. Intramural Black-race stratified PheWAS results adjusted for age at diagnosis and EHR length.

Supplemental Table 18. Intramural Asian-race stratified PheWAS results adjusted for age at diagnosis and EHR length.

Supplemental Table 19. Intramural subtyped-subset PheWAS results adjusted for age at diagnosis, race, and EHR length.

Supplemental Table 20. Intramural replication PheWAS in *All of Us* adjusted for age at diagnosis, race, and EHR length.

Supplemental Table 21. Subserosal primary PheWAS results adjusted for age at diagnosis, race, and EHR length.

Supplemental Table 22. Subserosal primary analysis significant associations and their system categories counts.

Supplemental Table 23. Significant obstetric associations with subserosal fibroids of all individuals compared to EHR-recorded pregnancy subset.

Supplemental Table 24. Subserosal White-race stratified PheWAS results adjusted for age at diagnosis and EHR length.

Supplemental Table 25. Subserosal Black-race stratified PheWAS results adjusted for age at diagnosis and EHR length.

Supplemental Table 26. Subserosal Asian-race stratified PheWAS results adjusted for age at diagnosis and EHR length.

Supplemental Table 27. Subserosal subtyped-subset PheWAS results adjusted for age at diagnosis, race, and EHR length.

Supplemental Table 28. Subserosal replication PheWAS in *All of Us* adjusted for age at diagnosis, race, and EHR length.
