# Supplementary material for: Phenome-wide association study of uterine fibroid subtypes reveals symptoms of fibroid severity and subtype-specific comorbidities
Source: Research Square preprint supplement (doi:10.21203/rs.3.rs-9271647/v1), 2026-04-21
Supplement: Supplementary file 2 [file 922faaaf102d843bee89e8d8.xlsx]

## Sheet: ST1. Phenotyping codes
Additional fibroids diagnosis codes implemented into existing phenotyping algorithm (Feingold-Link, 2014)
ICD10
D25*
O34.1*
0U590ZZ
0UB94ZZ
0U594ZZ
0U597ZZ
0UB98ZZ
0UB90ZZ
0UB93ZZ
0U593ZZ
0UB97ZZ
0U598ZZ
Inclusion criteria for submucosal fibroids cases
Include Where (at least one below):
Contains ICD9 code 218.0-Submucous leiomyoma of uterus
Contains ICD10 code D25.0-Submucous leiomyoma of uterus
AND
Include Where (at least one below):
Contains Keyword 'submucus' in Pathology Reports
Contains Keyword 'submucus' in Radiology Reports
Contains Keyword 'submucosal' in Radiology Reports
Contains Keyword 'submucosal' in Pathology Reports
Contains Keyword 'submucous' in Pathology Reports
Contains Keyword 'submucous' in Radiology Reports
AND
Include Where (at least one below):
Contains Keyword 'fibroid' in Pathology Reports
Contains Keyword 'fibroid' in Radiology Reports
Contains Keyword 'leiomyomata' in Pathology Reports
Contains Keyword 'leiomyomata' in Radiology Reports
Contains Keyword 'leiomyoma' in Pathology Reports
Contains Keyword 'leiomyoma' in Radiology Reports
Exclusion criteria for submucosal fibroids controls
Exclude Where (at least one below):
Contains ICD10 code D25.0-Submucous leiomyoma of uterus
Contains ICD9 code 218.0-Submucous leiomyoma of uterus
Inclusion criteria for intramural fibroids cases
Include Where (at least one below):
Contains CPT code 58146
Contains CPT code 58140
Contains CPT code 58145
Contains ICD10 code D25.1-Intramural leiomyoma of uterus
Contains ICD9 code 218.1-Intramural leiomyoma of uterus
AND
Include Where (at least one below):
Contains Keyword 'intramural' in Pathology Reports
Contains Keyword 'intramural' in Radiology Reports
AND
Include Where (at least one below):
Contains Keyword 'fibroid' in Pathology Reports
Contains Keyword 'fibroid' in Radiology Reports
Contains Keyword 'leiomyomata' in Pathology Reports
Contains Keyword 'leiomyomata' in Radiology Reports
Contains Keyword 'leiomyoma' in Pathology Reports
Contains Keyword 'leiomyoma' in Radiology Reports
Exclusion criteria for intramural fibroids controls
Exclude Where (at least one below):
Contains ICD10 code D25.1-Intramural leiomyoma of uterus
Contains ICD9 code 218.1-Intramural leiomyoma of uterus
Inclusion criteria for subserosal fibroids cases
Include Where (at least one below):
Contains ICD10 code D25.2-Subserosal leiomyoma of uterus
Contains ICD9 code 218.2-Subserous leiomyoma of uterus
AND
Include Where (at least one below):
Contains Keyword 'subserosal' in Pathology Reports
Contains Keyword 'subserous' in Radiology Reports
Contains Keyword 'subserous' in Pathology Reports
Contains Keyword 'subserosal' in Radiology Reports
AND
Include Where (at least one below):
Contains Keyword 'fibroid' in Pathology Reports
Contains Keyword 'fibroid' in Radiology Reports
Contains Keyword 'leiomyomata' in Pathology Reports
Contains Keyword 'leiomyomata' in Radiology Reports
Contains Keyword 'leiomyoma' in Pathology Reports
Contains Keyword 'leiomyoma' in Radiology Reports
Exclusion criteria for subserosal fibroids controls
Exclude Where (at least one below):
Contains ICD10 code D25.2-Subserosal leiomyoma of uterus
Contains ICD9 code 218.2-Subserous leiomyoma of uterus

## Sheet: ST2. Pregnancy codes
concept_code	concept_name	vocabulary_id
40485048	Estimated fetal GA at delivery	concept ID for observation table
4260757	Length of gestation at birth	concept ID for observation table
01965	Anesthesia for incomplete or missed abortion procedures	CPT4
59400	Routine obstetric care including antepartum care, vaginal delivery (with or without episiotomy, and/or forceps) and postpartum care	CPT4
59409	Vaginal delivery only (with or without episiotomy and/or forceps)	CPT4
59410	Vaginal delivery only (with or without episiotomy and/or forceps); including postpartum care	CPT4
59510	Routine obstetric care including antepartum care, cesarean delivery, and postpartum care	CPT4
59514	Cesarean delivery only	CPT4
59515	Cesarean delivery only; including postpartum care	CPT4
59610	Routine obstetric care including antepartum care, vaginal delivery (with or without episiotomy, and/or forceps) and postpartum care, after previous cesarean delivery	CPT4
59612	Vaginal delivery only, after previous cesarean delivery (with or without episiotomy and/or forceps)	CPT4
59614	Vaginal delivery only, after previous cesarean delivery (with or without episiotomy and/or forceps); including postpartum care	CPT4
59618	Routine obstetric care including antepartum care, cesarean delivery, and postpartum care, following attempted vaginal delivery after previous cesarean delivery	CPT4
59620	Cesarean delivery only, following attempted vaginal delivery after previous cesarean delivery	CPT4
59622	Cesarean delivery only, following attempted vaginal delivery after previous cesarean delivery; including postpartum care	CPT4
O30	Multiple gestation	ICD10CM
O30.0	Twin pregnancy	ICD10CM
O30.00	Twin pregnancy, unspecified number of placenta and unspecified number of amniotic sacs	ICD10CM
O30.001	Twin pregnancy, unspecified number of placenta and unspecified number of amniotic sacs, first trimester	ICD10CM
O30.002	Twin pregnancy, unspecified number of placenta and unspecified number of amniotic sacs, second trimester	ICD10CM
O30.003	Twin pregnancy, unspecified number of placenta and unspecified number of amniotic sacs, third trimester	ICD10CM
O30.009	Twin pregnancy, unspecified number of placenta and unspecified number of amniotic sacs, unspecified trimester	ICD10CM
O30.01	Twin pregnancy, monochorionic/monoamniotic	ICD10CM
O30.011	Twin pregnancy, monochorionic/monoamniotic, first trimester	ICD10CM
O30.012	Twin pregnancy, monochorionic/monoamniotic, second trimester	ICD10CM
O30.013	Twin pregnancy, monochorionic/monoamniotic, third trimester	ICD10CM
O30.019	Twin pregnancy, monochorionic/monoamniotic, unspecified trimester	ICD10CM
O30.02	Conjoined twin pregnancy	ICD10CM
O30.021	Conjoined twin pregnancy, first trimester	ICD10CM
O30.022	Conjoined twin pregnancy, second trimester	ICD10CM
O30.023	Conjoined twin pregnancy, third trimester	ICD10CM
O30.029	Conjoined twin pregnancy, unspecified trimester	ICD10CM
O30.03	Twin pregnancy, monochorionic/diamniotic	ICD10CM
O30.031	Twin pregnancy, monochorionic/diamniotic, first trimester	ICD10CM
O30.032	Twin pregnancy, monochorionic/diamniotic, second trimester	ICD10CM
O30.033	Twin pregnancy, monochorionic/diamniotic, third trimester	ICD10CM
O30.039	Twin pregnancy, monochorionic/diamniotic, unspecified trimester	ICD10CM
O30.04	Twin pregnancy, dichorionic/diamniotic	ICD10CM
O30.041	Twin pregnancy, dichorionic/diamniotic, first trimester	ICD10CM
O30.042	Twin pregnancy, dichorionic/diamniotic, second trimester	ICD10CM
O30.043	Twin pregnancy, dichorionic/diamniotic, third trimester	ICD10CM
O30.049	Twin pregnancy, dichorionic/diamniotic, unspecified trimester	ICD10CM
O30.09	Twin pregnancy, unable to determine number of placenta and number of amniotic sacs	ICD10CM
O30.091	Twin pregnancy, unable to determine number of placenta and number of amniotic sacs, first trimester	ICD10CM
O30.092	Twin pregnancy, unable to determine number of placenta and number of amniotic sacs, second trimester	ICD10CM
O30.093	Twin pregnancy, unable to determine number of placenta and number of amniotic sacs, third trimester	ICD10CM
O30.099	Twin pregnancy, unable to determine number of placenta and number of amniotic sacs, unspecified trimester	ICD10CM
O30.1	Triplet pregnancy	ICD10CM
O30.10	Triplet pregnancy, unspecified number of placenta and unspecified number of amniotic sacs	ICD10CM
O30.101	Triplet pregnancy, unspecified number of placenta and unspecified number of amniotic sacs, first trimester	ICD10CM
O30.102	Triplet pregnancy, unspecified number of placenta and unspecified number of amniotic sacs, second trimester	ICD10CM
O30.103	Triplet pregnancy, unspecified number of placenta and unspecified number of amniotic sacs, third trimester	ICD10CM
O30.109	Triplet pregnancy, unspecified number of placenta and unspecified number of amniotic sacs, unspecified trimester	ICD10CM
O30.11	Triplet pregnancy with two or more monochorionic fetuses	ICD10CM
O30.111	Triplet pregnancy with two or more monochorionic fetuses, first trimester	ICD10CM
O30.112	Triplet pregnancy with two or more monochorionic fetuses, second trimester	ICD10CM
O30.113	Triplet pregnancy with two or more monochorionic fetuses, third trimester	ICD10CM
O30.119	Triplet pregnancy with two or more monochorionic fetuses, unspecified trimester	ICD10CM
O30.12	Triplet pregnancy with two or more monoamniotic fetuses	ICD10CM
O30.121	Triplet pregnancy with two or more monoamniotic fetuses, first trimester	ICD10CM
O30.122	Triplet pregnancy with two or more monoamniotic fetuses, second trimester	ICD10CM
O30.123	Triplet pregnancy with two or more monoamniotic fetuses, third trimester	ICD10CM
O30.129	Triplet pregnancy with two or more monoamniotic fetuses, unspecified trimester	ICD10CM
O30.13	Triplet pregnancy, trichorionic/triamniotic	ICD10CM
O30.131	Triplet pregnancy, trichorionic/triamniotic, first trimester	ICD10CM
O30.132	Triplet pregnancy, trichorionic/triamniotic, second trimester	ICD10CM
O30.133	Triplet pregnancy, trichorionic/triamniotic, third trimester	ICD10CM
O30.139	Triplet pregnancy, trichorionic/triamniotic, unspecified trimester	ICD10CM
O30.19	Triplet pregnancy, unable to determine number of placenta and number of amniotic sacs	ICD10CM
O30.191	Triplet pregnancy, unable to determine number of placenta and number of amniotic sacs, first trimester	ICD10CM
O30.192	Triplet pregnancy, unable to determine number of placenta and number of amniotic sacs, second trimester	ICD10CM
O30.193	Triplet pregnancy, unable to determine number of placenta and number of amniotic sacs, third trimester	ICD10CM
O30.199	Triplet pregnancy, unable to determine number of placenta and number of amniotic sacs, unspecified trimester	ICD10CM
O30.2	Quadruplet pregnancy	ICD10CM
O30.20	Quadruplet pregnancy, unspecified number of placenta and unspecified number of amniotic sacs	ICD10CM
O30.201	Quadruplet pregnancy, unspecified number of placenta and unspecified number of amniotic sacs, first trimester	ICD10CM
O30.202	Quadruplet pregnancy, unspecified number of placenta and unspecified number of amniotic sacs, second trimester	ICD10CM
O30.209	Quadruplet pregnancy, unspecified number of placenta and unspecified number of amniotic sacs, unspecified trimester	ICD10CM
O30.21	Quadruplet pregnancy with two or more monochorionic fetuses	ICD10CM
O30.211	Quadruplet pregnancy with two or more monochorionic fetuses, first trimester	ICD10CM
O30.212	Quadruplet pregnancy with two or more monochorionic fetuses, second trimester	ICD10CM
O30.213	Quadruplet pregnancy with two or more monochorionic fetuses, third trimester	ICD10CM
O30.219	Quadruplet pregnancy with two or more monochorionic fetuses, unspecified trimester	ICD10CM
O30.221	Quadruplet pregnancy with two or more monoamniotic fetuses, first trimester	ICD10CM
O30.222	Quadruplet pregnancy with two or more monoamniotic fetuses, second trimester	ICD10CM
O30.223	Quadruplet pregnancy with two or more monoamniotic fetuses, third trimester	ICD10CM
O30.229	Quadruplet pregnancy with two or more monoamniotic fetuses, unspecified trimester	ICD10CM
O30.23	Quadruplet pregnancy, quadrachorionic/quadra-amniotic	ICD10CM
O30.231	Quadruplet pregnancy, quadrachorionic/quadra-amniotic, first trimester	ICD10CM
O30.232	Quadruplet pregnancy, quadrachorionic/quadra-amniotic, second trimester	ICD10CM
O30.233	Quadruplet pregnancy, quadrachorionic/quadra-amniotic, third trimester	ICD10CM
O30.239	Quadruplet pregnancy, quadrachorionic/quadra-amniotic, unspecified trimester	ICD10CM
O30.29	Quadruplet pregnancy, unable to determine number of placenta and number of amniotic sacs	ICD10CM
O30.291	Quadruplet pregnancy, unable to determine number of placenta and number of amniotic sacs, first trimester	ICD10CM
O30.292	Quadruplet pregnancy, unable to determine number of placenta and number of amniotic sacs, second trimester	ICD10CM
O30.293	Quadruplet pregnancy, unable to determine number of placenta and number of amniotic sacs, third trimester	ICD10CM
O30.299	Quadruplet pregnancy, unable to determine number of placenta and number of amniotic sacs, unspecified trimester	ICD10CM
O30.8	Other specified multiple gestation	ICD10CM
O30.80	Other specified multiple gestation, unspecified number of placenta and unspecified number of amniotic sacs	ICD10CM
O30.801	Other specified multiple gestation, unspecified number of placenta and unspecified number of amniotic sacs, first trimester	ICD10CM
O30.802	Other specified multiple gestation, unspecified number of placenta and unspecified number of amniotic sacs, second trimester	ICD10CM
O30.803	Other specified multiple gestation, unspecified number of placenta and unspecified number of amniotic sacs, third trimester	ICD10CM
O30.809	Other specified multiple gestation, unspecified number of placenta and unspecified number of amniotic sacs, unspecified trimester	ICD10CM
O30.81	Other specified multiple gestation with two or more monochorionic fetuses	ICD10CM
O30.811	Other specified multiple gestation with two or more monochorionic fetuses, first trimester	ICD10CM
O30.812	Other specified multiple gestation with two or more monochorionic fetuses, second trimester	ICD10CM
O30.813	Other specified multiple gestation with two or more monochorionic fetuses, third trimester	ICD10CM
O30.819	Other specified multiple gestation with two or more monochorionic fetuses, unspecified trimester	ICD10CM
O30.82	Other specified multiple gestation with two or more monoamniotic fetuses	ICD10CM
O30.821	Other specified multiple gestation with two or more monoamniotic fetuses, first trimester	ICD10CM
O30.823	Other specified multiple gestation with two or more monoamniotic fetuses, third trimester	ICD10CM
O30.829	Other specified multiple gestation with two or more monoamniotic fetuses, unspecified trimester	ICD10CM
O30.83	Other specified multiple gestation, number of chorions and amnions are both equal to the number of fetuses	ICD10CM
O30.831	Other specified multiple gestation, number of chorions and amnions are both equal to the number of fetuses, first trimester	ICD10CM
O30.832	Other specified multiple gestation, number of chorions and amnions are both equal to the number of fetuses, second trimester	ICD10CM
O30.833	Other specified multiple gestation, number of chorions and amnions are both equal to the number of fetuses, third trimester	ICD10CM
O30.89	Other specified multiple gestation, unable to determine number of placenta and number of amniotic sacs	ICD10CM
O30.891	Other specified multiple gestation, unable to determine number of placenta and number of amniotic sacs, first trimester	ICD10CM
O30.892	Other specified multiple gestation, unable to determine number of placenta and number of amniotic sacs, second trimester	ICD10CM
O30.893	Other specified multiple gestation, unable to determine number of placenta and number of amniotic sacs, third trimester	ICD10CM
O30.899	Other specified multiple gestation, unable to determine number of placenta and number of amniotic sacs, unspecified trimester	ICD10CM
O30.9	Multiple gestation, unspecified	ICD10CM
O30.90	Multiple gestation, unspecified, unspecified trimester	ICD10CM
O30.91	Multiple gestation, unspecified, first trimester	ICD10CM
O30.92	Multiple gestation, unspecified, second trimester	ICD10CM
O30.93	Multiple gestation, unspecified, third trimester	ICD10CM
O75.82	Onset (spontaneous) of labor after 37 completed weeks of gestation but before 39 completed weeks gestation, with delivery by (planned) cesarean section	ICD10CM
O80	Encounter for full-term uncomplicated delivery	ICD10CM
O82	Encounter for cesarean delivery without indication	ICD10CM
Z37.2	Twins, both liveborn	ICD10CM
Z37.3	Twins, one liveborn and one stillborn	ICD10CM
Z37.5	Other multiple births, all liveborn	ICD10CM
Z37.50	Multiple births, unspecified, all liveborn	ICD10CM
Z37.51	Triplets, all liveborn	ICD10CM
Z37.52	Quadruplets, all liveborn	ICD10CM
Z37.53	Quintuplets, all liveborn	ICD10CM
Z37.54	Sextuplets, all liveborn	ICD10CM
Z37.59	Other multiple births, all liveborn	ICD10CM
Z37.61	Triplets, some liveborn	ICD10CM
Z38.2	Single liveborn infant, unspecified as to place of birth	ICD10CM
Z38.5	Twin liveborn infant, unspecified as to place of birth	ICD10CM
Z38.62	Triplet liveborn infant, delivered by cesarean	ICD10CM
Z38.64	Quadruplet liveborn infant, delivered by cesarean	ICD10CM
O20.0	Threatened abortion	ICD10CM
O03.9	Complete or unspecified spontaneous abortion without complication	ICD10CM
O02.1	Missed abortion	ICD10CM
O03.4	Incomplete spontaneous abortion without complication	ICD10CM
O03.1	Delayed or excessive hemorrhage following incomplete spontaneous abortion	ICD10CM
O03.6	Delayed or excessive hemorrhage following complete or unspecified spontaneous abortion	ICD10CM
O31.10X0	Continuing pregnancy after spontaneous abortion of one fetus or more, unspecified trimester, not applicable or unspecified	ICD10CM
O03.30	Unspecified complication following incomplete spontaneous abortion	ICD10CM
O31.13X0	Continuing pregnancy after spontaneous abortion of one fetus or more, third trimester, not applicable or unspecified	ICD10CM
O31.12X0	Continuing pregnancy after spontaneous abortion of one fetus or more, second trimester, not applicable or unspecified	ICD10CM
O03.5	Genital tract and pelvic infection following complete or unspecified spontaneous abortion	ICD10CM
O03.87	Sepsis following complete or unspecified spontaneous abortion	ICD10CM
O03.80	Unspecified complication following complete or unspecified spontaneous abortion	ICD10CM
O03.32	Renal failure following incomplete spontaneous abortion	ICD10CM
O03.37	Sepsis following incomplete spontaneous abortion	ICD10CM
O31.11X2	Continuing pregnancy after spontaneous abortion of one fetus or more, first trimester, fetus 2	ICD10CM
O03.39	Incomplete spontaneous abortion with other complications	ICD10CM
O31.11X0	Continuing pregnancy after spontaneous abortion of one fetus or more, first trimester, not applicable or unspecified	ICD10CM
O03.2	Embolism following incomplete spontaneous abortion	ICD10CM
O31.13X2	Continuing pregnancy after spontaneous abortion of one fetus or more, third trimester, fetus 2	ICD10CM
O31.12X1	Continuing pregnancy after spontaneous abortion of one fetus or more, second trimester, fetus 1	ICD10CM
O31.12X2	Continuing pregnancy after spontaneous abortion of one fetus or more, second trimester, fetus 2	ICD10CM
O03.7	Embolism following complete or unspecified spontaneous abortion	ICD10CM
O31.11X1	Continuing pregnancy after spontaneous abortion of one fetus or more, first trimester, fetus 1	ICD10CM
O31.13X1	Continuing pregnancy after spontaneous abortion of one fetus or more, third trimester, fetus 1	ICD10CM
O03.88	Urinary tract infection following complete or unspecified spontaneous abortion	ICD10CM
O03.38	Urinary tract infection following incomplete spontaneous abortion	ICD10CM
O03.31	Shock following incomplete spontaneous abortion	ICD10CM
O03.81	Shock following complete or unspecified spontaneous abortion	ICD10CM
O03.84	Damage to pelvic organs following complete or unspecified spontaneous abortion	ICD10CM
O31.11X3	Continuing pregnancy after spontaneous abortion of one fetus or more, first trimester, fetus 3	ICD10CM
O31.13X3	Continuing pregnancy after spontaneous abortion of one fetus or more, third trimester, fetus 3	ICD10CM
O03.83	Metabolic disorder following complete or unspecified spontaneous abortion	ICD10CM
O03.33	Metabolic disorder following incomplete spontaneous abortion	ICD10CM
O03.34	Damage to pelvic organs following incomplete spontaneous abortion	ICD10CM
O31.10X1	Continuing pregnancy after spontaneous abortion of one fetus or more, unspecified trimester, fetus 1	ICD10CM
O31.12X3	Continuing pregnancy after spontaneous abortion of one fetus or more, second trimester, fetus 3	ICD10CM
O03.35	Other venous complications following incomplete spontaneous abortion	ICD10CM
O03.8	Other and unspecified complications following complete or unspecified spontaneous abortion	ICD10CM
O31.13X5	Continuing pregnancy after spontaneous abortion of one fetus or more, third trimester, fetus 5	ICD10CM
O31.11X4	Continuing pregnancy after spontaneous abortion of one fetus or more, first trimester, fetus 4	ICD10CM
O31.10X3	Continuing pregnancy after spontaneous abortion of one fetus or more, unspecified trimester, fetus 3	ICD10CM
O31.12X5	Continuing pregnancy after spontaneous abortion of one fetus or more, second trimester, fetus 5	ICD10CM
O03	Spontaneous abortion	ICD10CM
O03.3	Other and unspecified complications following incomplete spontaneous abortion	ICD10CM
O31.12X9	Continuing pregnancy after spontaneous abortion of one fetus or more, second trimester, other fetus	ICD10CM
O31.10X2	Continuing pregnancy after spontaneous abortion of one fetus or more, unspecified trimester, fetus 2	ICD10CM
O31.11X9	Continuing pregnancy after spontaneous abortion of one fetus or more, first trimester, other fetus	ICD10CM
O31.10X5	Continuing pregnancy after spontaneous abortion of one fetus or more, unspecified trimester, fetus 5	ICD10CM
O31.13X4	Continuing pregnancy after spontaneous abortion of one fetus or more, third trimester, fetus 4	ICD10CM
O31.12X9	Continuing pregnancy after spontaneous abortion of one fetus or more, second trimester, other fetus	ICD10CM
O03.86	Cardiac arrest following complete or unspecified spontaneous abortion	ICD10CM
O03.85	Other venous complications following complete or unspecified spontaneous abortion	ICD10CM
O03.36	Cardiac arrest following incomplete spontaneous abortion	ICD10CM
O31.10X4	Continuing pregnancy after spontaneous abortion of one fetus or more, unspecified trimester, fetus 4	ICD10CM
O31.10X9	Continuing pregnancy after spontaneous abortion of one fetus or more, unspecified trimester, other fetus	ICD10CM
O03.82	Renal failure following complete or unspecified spontaneous abortion	ICD10CM
O31.11X5	Continuing pregnancy after spontaneous abortion of one fetus or more, first trimester, fetus 5	ICD10CM
O31.12X4	Continuing pregnancy after spontaneous abortion of one fetus or more, second trimester, fetus 4	ICD10CM
O31.1	Continuing pregnancy after spontaneous abortion of one fetus or more	ICD10CM
O60.03	Preterm labor without delivery, third trimester	ICD10CM
O60.02	Preterm labor without delivery, second trimester	ICD10CM
O60.00	Preterm labor without delivery, unspecified trimester	ICD10CM
O60.14X1	Preterm labor third trimester with preterm delivery third trimester, fetus 1	ICD10CM
O60.14X2	Preterm labor third trimester with preterm delivery third trimester, fetus 2	ICD10CM
O60.12X1	Preterm labor second trimester with preterm delivery second trimester, fetus 1	ICD10CM
O60.12X2	Preterm labor second trimester with preterm delivery second trimester, fetus 2	ICD10CM
O60.20X0	Term delivery with preterm labor, unspecified trimester, not applicable or unspecified	ICD10CM
O60.10X1	Preterm labor with preterm delivery, unspecified trimester, fetus 1	ICD10CM
O60.13X1	Preterm labor second trimester with preterm delivery third trimester, fetus 1	ICD10CM
O60.14X3	Preterm labor third trimester with preterm delivery third trimester, fetus 3	ICD10CM
O60.13X2	Preterm labor second trimester with preterm delivery third trimester, fetus 2	ICD10CM
O60.12X3	Preterm labor second trimester with preterm delivery second trimester, fetus 3	ICD10CM
O60.23X1	Term delivery with preterm labor, third trimester, fetus 1	ICD10CM
O60.14X9	Preterm labor third trimester with preterm delivery third trimester, other fetus	ICD10CM
O60.13X3	Preterm labor second trimester with preterm delivery third trimester, fetus 3	ICD10CM
O60.20X1	Term delivery with preterm labor, unspecified trimester, fetus 1	ICD10CM
O60.10X2	Preterm labor with preterm delivery, unspecified trimester, fetus 2	ICD10CM
O60.10X9	Preterm labor with preterm delivery, unspecified trimester, other fetus	ICD10CM
O60.23X2	Term delivery with preterm labor, third trimester, fetus 2	ICD10CM
O60.20X9	Term delivery with preterm labor, unspecified trimester, other fetus	ICD10CM
O60.23X3	Term delivery with preterm labor, third trimester, fetus 3	ICD10CM
O60.2	Term delivery with preterm labor	ICD10CM
O60.22X4	Term delivery with preterm labor, second trimester, fetus 4	ICD10CM
O60.22X5	Term delivery with preterm labor, second trimester, fetus 5	ICD10CM
O60.13	Preterm labor second trimester with preterm delivery third trimester	ICD10CM
O60	Preterm labor	ICD10CM
O60.1	Preterm labor with preterm delivery	ICD10CM
O60.13X9	Preterm labor second trimester with preterm delivery third trimester, other fetus	ICD10CM
O60.10X5	Preterm labor with preterm delivery, unspecified trimester, fetus 5	ICD10CM
O60.10X3	Preterm labor with preterm delivery, unspecified trimester, fetus 3	ICD10CM
O60.10X4	Preterm labor with preterm delivery, unspecified trimester, fetus 4	ICD10CM
O60.10	Preterm labor with preterm delivery, unspecified trimester	ICD10CM
O60.0	Preterm labor without delivery	ICD10CM
O60.22X1	Term delivery with preterm labor, second trimester, fetus 1	ICD10CM
O42.9	Premature rupture of membranes, unspecified as to length of time between rupture and onset of labor	ICD10CM
O60.23	Term delivery with preterm labor, third trimester	ICD10CM
O60.12X4	Preterm labor second trimester with preterm delivery second trimester, fetus 4	ICD10CM
O60.12	Preterm labor second trimester with preterm delivery second trimester	ICD10CM
O60.20X4	Term delivery with preterm labor, unspecified trimester, fetus 4	ICD10CM
O60.23X9	Term delivery with preterm labor, third trimester, other fetus	ICD10CM
O60.12X5	Preterm labor second trimester with preterm delivery second trimester, fetus 5	ICD10CM
O60.13X4	Preterm labor second trimester with preterm delivery third trimester, fetus 4	ICD10CM
O60.20X5	Term delivery with preterm labor, unspecified trimester, fetus 5	ICD10CM
O60.20X2	Term delivery with preterm labor, unspecified trimester, fetus 2	ICD10CM
O60.20X3	Term delivery with preterm labor, unspecified trimester, fetus 3	ICD10CM
O42.1	Premature rupture of membranes, onset of labor more than 24 hours following rupture	ICD10CM
O60.12X9	Preterm labor second trimester with preterm delivery second trimester, other fetus	ICD10CM
O60.22X3	Term delivery with preterm labor, second trimester, fetus 3	ICD10CM
O60.14	Preterm labor third trimester with preterm delivery third trimester	ICD10CM
O60.14X4	Preterm labor third trimester with preterm delivery third trimester, fetus 4	ICD10CM
O60.22X2	Term delivery with preterm labor, second trimester, fetus 2	ICD10CM
O60.23X5	Term delivery with preterm labor, third trimester, fetus 5	ICD10CM
O60.13X5	Preterm labor second trimester with preterm delivery third trimester, fetus 5	ICD10CM
O60.20	Term delivery with preterm labor, unspecified trimester	ICD10CM
O60.22	Term delivery with preterm labor, second trimester	ICD10CM
O42.0	Premature rupture of membranes, onset of labor within 24 hours of rupture	ICD10CM
O60.10	Preterm labor with preterm delivery, unspecified trimester	ICD10CM
O60.23X4	Term delivery with preterm labor, third trimester, fetus 4	ICD10CM
O60.14X5	Preterm labor third trimester with preterm delivery third trimester, fetus 5	ICD10CM
O60.22X9	Term delivery with preterm labor, second trimester, other fetus	ICD10CM
O36.4XX0	Maternal care for intrauterine death, not applicable or unspecified	ICD10CM
V27.1	Motorcycle passenger injured in collision with fixed or stationary object in nontraffic accident	ICD10CM
Z37.1	Single stillbirth	ICD10CM
Z37.9	Outcome of delivery, unspecified	ICD10CM
O36.4XX1	Maternal care for intrauterine death, fetus 1	ICD10CM
V27.3	Person boarding or alighting a motorcycle injured in collision with fixed or stationary object	ICD10CM
O31.23X2	Continuing pregnancy after intrauterine death of one fetus or more, third trimester, fetus 2	ICD10CM
O31.23X1	Continuing pregnancy after intrauterine death of one fetus or more, third trimester, fetus 1	ICD10CM
O31.22X1	Continuing pregnancy after intrauterine death of one fetus or more, second trimester, fetus 1	ICD10CM
Z37.3	Twins, one liveborn and one stillborn	ICD10CM
O31.21X1	Continuing pregnancy after intrauterine death of one fetus or more, first trimester, fetus 1	ICD10CM
O36.4XX2	Maternal care for intrauterine death, fetus 2	ICD10CM
O31.22X2	Continuing pregnancy after intrauterine death of one fetus or more, second trimester, fetus 2	ICD10CM
V27.4	Motorcycle driver injured in collision with fixed or stationary object in traffic accident	ICD10CM
Z37.4	Twins, both stillborn	ICD10CM
O31.23X0	Continuing pregnancy after intrauterine death of one fetus or more, third trimester, not applicable or unspecified	ICD10CM
O31.20X0	Continuing pregnancy after intrauterine death of one fetus or more, unspecified trimester, not applicable or unspecified	ICD10CM
O31.22X0	Continuing pregnancy after intrauterine death of one fetus or more, second trimester, not applicable or unspecified	ICD10CM
O31.21X0	Continuing pregnancy after intrauterine death of one fetus or more, first trimester, not applicable or unspecified	ICD10CM
O31.21X2	Continuing pregnancy after intrauterine death of one fetus or more, first trimester, fetus 2	ICD10CM
V32.1	Passenger in three-wheeled motor vehicle injured in collision with two- or three-wheeled motor vehicle in nontraffic accident	ICD10CM
O31.21X9	Continuing pregnancy after intrauterine death of one fetus or more, first trimester, other fetus	ICD10CM
O31.23X3	Continuing pregnancy after intrauterine death of one fetus or more, third trimester, fetus 3	ICD10CM
O31.22X3	Continuing pregnancy after intrauterine death of one fetus or more, second trimester, fetus 3	ICD10CM
V32.0	Driver of three-wheeled motor vehicle injured in collision with two- or three-wheeled motor vehicle in nontraffic accident	ICD10CM
O36.4XX9	Maternal care for intrauterine death, other fetus	ICD10CM
O31.20X1	Continuing pregnancy after intrauterine death of one fetus or more, unspecified trimester, fetus 1	ICD10CM
O36.4XX3	Maternal care for intrauterine death, fetus 3	ICD10CM
Z37.60	Multiple births, unspecified, some liveborn	ICD10CM
V35.0	Driver of three-wheeled motor vehicle injured in collision with railway train or railway vehicle in nontraffic accident	ICD10CM
Z37.7	Other multiple births, all stillborn	ICD10CM
O31.20X2	Continuing pregnancy after intrauterine death of one fetus or more, unspecified trimester, fetus 2	ICD10CM
O31.23X9	Continuing pregnancy after intrauterine death of one fetus or more, third trimester, other fetus	ICD10CM
Z37.64	Sextuplets, some liveborn	ICD10CM
O31.23X4	Continuing pregnancy after intrauterine death of one fetus or more, third trimester, fetus 4	ICD10CM
V36	Occupant of three-wheeled motor vehicle injured in collision with other nonmotor vehicle	ICD10CM
O31.23X5	Continuing pregnancy after intrauterine death of one fetus or more, third trimester, fetus 5	ICD10CM
O31.20X9	Continuing pregnancy after intrauterine death of one fetus or more, unspecified trimester, other fetus	ICD10CM
V32.2	Person on outside of three-wheeled motor vehicle injured in collision with two- or three-wheeled motor vehicle in nontraffic accident	ICD10CM
O36.4	Maternal care for intrauterine death	ICD10CM
V35	Occupant of three-wheeled motor vehicle injured in collision with railway train or railway vehicle	ICD10CM
O31.22X4	Continuing pregnancy after intrauterine death of one fetus or more, second trimester, fetus 4	ICD10CM
V35.2	Person on outside of three-wheeled motor vehicle injured in collision with railway train or railway vehicle in nontraffic accident	ICD10CM
O31.21	Continuing pregnancy after intrauterine death of one fetus or more, first trimester	ICD10CM
V36.2	Person on outside of three-wheeled motor vehicle injured in collision with other nonmotor vehicle in nontraffic accident	ICD10CM
O31.21X4	Continuing pregnancy after intrauterine death of one fetus or more, first trimester, fetus 4	ICD10CM
V33	Occupant of three-wheeled motor vehicle injured in collision with car, pick-up truck or van	ICD10CM
O31.20X4	Continuing pregnancy after intrauterine death of one fetus or more, unspecified trimester, fetus 4	ICD10CM
O31.20	Continuing pregnancy after intrauterine death of one fetus or more, unspecified trimester	ICD10CM
O31.21X5	Continuing pregnancy after intrauterine death of one fetus or more, first trimester, fetus 5	ICD10CM
V37	Occupant of three-wheeled motor vehicle injured in collision with fixed or stationary object	ICD10CM
O31.22X9	Continuing pregnancy after intrauterine death of one fetus or more, second trimester, other fetus	ICD10CM
Z37.63	Quintuplets, some liveborn	ICD10CM
Z37.69	Other multiple births, some liveborn	ICD10CM
V32	Occupant of three-wheeled motor vehicle injured in collision with two- or three-wheeled motor vehicle	ICD10CM
V35.1	Passenger in three-wheeled motor vehicle injured in collision with railway train or railway vehicle in nontraffic accident	ICD10CM
O31.2	Continuing pregnancy after intrauterine death of one fetus or more	ICD10CM
O36.4XX4	Maternal care for intrauterine death, fetus 4	ICD10CM
O36.4XX5	Maternal care for intrauterine death, fetus 5	ICD10CM
Z37.62	Quadruplets, some liveborn	ICD10CM
Z37.6	Other multiple births, some liveborn	ICD10CM
V36.0	Driver of three-wheeled motor vehicle injured in collision with other nonmotor vehicle in nontraffic accident	ICD10CM
V36.1	Passenger in three-wheeled motor vehicle injured in collision with other nonmotor vehicle in nontraffic accident	ICD10CM
O31.22X5	Continuing pregnancy after intrauterine death of one fetus or more, second trimester, fetus 5	ICD10CM
O31.23	Continuing pregnancy after intrauterine death of one fetus or more, third trimester	ICD10CM
O31.22	Continuing pregnancy after intrauterine death of one fetus or more, second trimester	ICD10CM
P95	Stillbirth	ICD10CM
O31.21X3	Continuing pregnancy after intrauterine death of one fetus or more, first trimester, fetus 3	ICD10CM
O31.20X5	Continuing pregnancy after intrauterine death of one fetus or more, unspecified trimester, fetus 5	ICD10CM
O31.20X3	Continuing pregnancy after intrauterine death of one fetus or more, unspecified trimester, fetus 3	ICD10CM
650	Normal delivery	ICD9CM
651	Multiple gestation	ICD9CM
651.01	Twin pregnancy, delivered, with or without mention of antepartum condition	ICD9CM
651.11	Triplet pregnancy, delivered, with or without mention of antepartum condition	ICD9CM
651.8	Other specified multiple gestation, unspecified as to episode of care or not applicable	ICD9CM
651.81	Other specified multiple gestation, delivered, with or without mention of antepartum condition	ICD9CM
651.83	Other specified multiple gestation, antepartum condition or complication	ICD9CM
651.9	Unspecified multiple gestation, unspecified as to episode of care or not applicable	ICD9CM
651.91	Unspecified multiple gestation, delivered, with or without mention of antepartum condition	ICD9CM
651.93	Unspecified multiple gestation, antepartum condition or complication	ICD9CM
652.6	Multiple gestation with malpresentation of one fetus or more, unspecified as to episode of care or not applicable	ICD9CM
652.61	Multiple gestation with malpresentation of one fetus or more, delivered, with or without mention of antepartum condition	ICD9CM
652.63	Multiple gestation with malpresentation of one fetus or more, antepartum condtion or complication	ICD9CM
658.2	Delayed delivery after spontaneous or unspecified rupture of membranes	ICD9CM
658.21	Delayed delivery after spontaneous or unspecified rupture of membranes, delivered, with or without mention of antepartum condition	ICD9CM
658.3	Delayed delivery after artificial rupture of membranes	ICD9CM
658.31	Delayed delivery after artificial rupture of membranes, delivered, with or without mention of antepartum condition	ICD9CM
662.01	Prolonged first stage of labor, delivered, with or without mention of antepartum condition	ICD9CM
662.11	Unspecified prolonged labor, delivered, with or without mention of antepartum condition	ICD9CM
662.21	Prolonged second stage of labor, delivered, with or without mention of antepartum condition	ICD9CM
662.31	Delayed delivery of second twin, triplet, etc., delivered, with or without mention of antepartum condition	ICD9CM
669.5	Forceps or vacuum extractor delivery without mention of indication	ICD9CM
669.51	Forceps or vacuum extractor delivery without mention of indication, delivered, with or without mention of antepartum condition	ICD9CM
669.6	Breech extraction, without mention of indication	ICD9CM
669.61	Breech extraction, without mention of indication, delivered, with or without mention of antepartum condition	ICD9CM
669.7	Cesarean delivery, without mention of indication	ICD9CM
669.71	Cesarean delivery, without mention of indication, delivered, with or without mention of antepartum condition	ICD9CM
V27.0	Outcome of delivery, single liveborn	ICD9CM
V27.2	Outcome of delivery, twins, both liveborn	ICD9CM
V27.3	Outcome of delivery, twins, one liveborn and one stillborn	ICD9CM
V27.5	Outcome of delivery, other multiple birth, all liveborn	ICD9CM
V27.6	Outcome of delivery, other multiple birth, some liveborn	ICD9CM
V30	Single liveborn	ICD9CM
V30.0	Single liveborn, born in hospital	ICD9CM
V30.00	Single liveborn, born in hospital, delivered without mention of cesarean section	ICD9CM
V30.01	Single liveborn, born in hospital, delivered by cesarean section	ICD9CM
V30.1	Single liveborn, born before admission to hospital	ICD9CM
V30.2	Single liveborn, born outside hospital and not hospitalized	ICD9CM
V31	Twin birth, mate liveborn	ICD9CM
V31.0	Twin, mate liveborn, born in hospital	ICD9CM
V31.00	Twin birth, mate liveborn, born in hospital, delivered without mention of cesarean section	ICD9CM
V31.01	Twin birth, mate liveborn, born in hospital, delivered by cesarean section	ICD9CM
V31.1	Twin birth, mate liveborn, born before admission to hospital	ICD9CM
V31.2	Twin birth, mate liveborn, born outside hospital and not hospitalized	ICD9CM
V32	Twin birth, mate stillborn	ICD9CM
V32.0	Twin, mate stillborn, born in hospital	ICD9CM
V32.00	Twin birth, mate stillborn, born in hospital, delivered without mention of cesarean section	ICD9CM
V32.01	Twin birth, mate stillborn, born in hospital, delivered by cesarean section	ICD9CM
V32.1	Twin birth, mate stillborn, born before admission to hospital	ICD9CM
V32.2	Twin birth, mate stillborn, born outside hospital and not hospitalized	ICD9CM
V33	Twin birth, unspecified whether mate liveborn or stillborn	ICD9CM
V33.0	Twin, unspecified, born in hospital	ICD9CM
V33.00	Twin birth, unspecified whether mate liveborn or stillborn, born in hospital, delivered without mention of cesarean section	ICD9CM
V33.01	Twin birth, unspecified whether mate liveborn or stillborn, born in hospital, delivered by cesarean section	ICD9CM
V33.1	Twin birth, unspecified whether mate liveborn or stillborn, born before admission to hospital	ICD9CM
V33.2	Twin birth, unspecified whether mate liveborn or stillborn, born outside hospital and not hospitalized	ICD9CM
V34	Other multiple birth (three or more), mates all liveborn	ICD9CM
V34.0	Other multiple, mates all liveborn, born in hospital	ICD9CM
V34.00	Other multiple birth (three or more), mates all liveborn, born in hospital, delivered without mention of cesarean section	ICD9CM
V34.01	Other multiple birth (three or more), mates all liveborn, born in hospital, delivered by cesarean section	ICD9CM
V34.1	Other multiple birth (three or more), mates all liveborn, born before admission to hospital	ICD9CM
V34.2	Other multiple birth (three or more), mates all liveborn, born outside hospital and not hospitalized	ICD9CM
V35	Other multiple birth (three or more), mates all stillborn	ICD9CM
V35.0	Other multiple, mates all stillborn, born in hospital	ICD9CM
V35.00	Other multiple birth (three or more), mates all still born, born in hospital, delivered without mention of cesarean section	ICD9CM
V35.01	Other multiple birth (three or more), mates all still born, born in hospital, delivered by cesarean section	ICD9CM
V35.1	Other multiple birth (three or more), mates all stillborn, born before admission to hospital	ICD9CM
V35.2	Other multiple birth (three or more), mates all stillborn, born outside of hospital and not hospitalized	ICD9CM
V36	Other multiple birth (three or more), mates liveborn and stillborn	ICD9CM
V36.0	Other multiple, mates liveborn and stillborn, born in hospital	ICD9CM
V36.00	Other multiple birth (three or more), mates liveborn and stillborn, born in hospital, delivered without mention of cesarean section	ICD9CM
V36.01	Other multiple birth (three or more), mates liveborn and stillborn, born in hospital, delivered without mention of cesarean section	ICD9CM
V36.1	Other multiple birth (three or more), mates liveborn and stillborn, born before admission to hospital	ICD9CM
V36.2	Other multiple birth (three or more), mates liveborn and stillborn, born outside hospital and not hospitalized	ICD9CM
V37	Other multiple birth (three or more), unspecified whether mates liveborn or stillborn	ICD9CM
V37.0	Other multiple, unspecified, born in hospital	ICD9CM
V37.00	Other multiple birth (three or more), unspecified whether mates liveborn or stillborn, born in hospital, delivered without mention of cesarean section	ICD9CM
V37.01	Other multiple birth (three or more), unspecified whether mates liveborn or stillborn, born in hospital, delivered by cesarean section	ICD9CM
V37.1	Other multiple birth (three or more), unspecified whether mates liveborn or stillborn, born before admission to hospital	ICD9CM
V37.2	Other multiple birth (three or more), unspecified whether mates liveborn or stillborn, born outside of hospital	ICD9CM
V39.0	Other liveborn, unspecified, born in hospital	ICD9CM
632	Missed abortion	ICD9CM
634.92	Spontaneous abortion, without mention of complication, complete	ICD9CM
634.91	Spontaneous abortion, without mention of complication, incomplete	ICD9CM
634.9	Spontaneous abortion, without mention of complication, unspecified	ICD9CM
634.11	Spontaneous abortion, complicated by delayed or excessive hemorrhage, incomplete	ICD9CM
634.1	Spontaneous abortion, complicated by delayed or excessive hemorrhage, unspecified	ICD9CM
637.91	Unspecified abortion, without mention of complication, incomplete	ICD9CM
637.9	Unspecified abortion, without mention of complication, unspecified	ICD9CM
637.92	Unspecified abortion, without mention of complication, complete	ICD9CM
634.71	Spontaneous abortion, with other specified complications, incomplete	ICD9CM
634	Spontaneous abortion	ICD9CM
634.12	Spontaneous abortion, complicated by delayed or excessive hemorrhage, complete	ICD9CM
634.81	Spontaneous abortion, with unspecified complication, incomplete	ICD9CM
634.01	Spontaneous abortion, complicated by genital tract and pelvic infection, incomplete	ICD9CM
634.9	Spontaneous abortion without mention of complication	ICD9CM
640.81	Other specified hemorrhage in early pregnancy, delivered, with or without mention of antepartum condition	ICD9CM
634.72	Spontaneous abortion, with other specified complications, complete	ICD9CM
634	Spontaneous abortion, complicated by genital tract and pelvic infection, unspecified	ICD9CM
634	Spontaneous abortion complicated by genital tract and pelvic infection	ICD9CM
634.7	Spontaneous abortion, with other specified complications, unspecified	ICD9CM
634.82	Spontaneous abortion, with unspecified complication, complete	ICD9CM
640.91	Unspecified hemorrhage in early pregnancy, delivered, with or without mention of antepartum condition	ICD9CM
637.1	Unspecified abortion, complicated by delayed or excessive hemorrhage, unspecified	ICD9CM
634.02	Spontaneous abortion, complicated by genital tract and pelvic infection, complete	ICD9CM
634.8	Spontaneous abortion, with unspecified complication, unspecified	ICD9CM
637.11	Unspecified abortion, complicated by delayed or excessive hemorrhage, incomplete	ICD9CM
637.9	Unspecified abortion without mention of complication	ICD9CM
637.12	Unspecified abortion, complicated by delayed or excessive hemorrhage, complete	ICD9CM
637	Unspecified abortion, complicated by genital tract and pelvic infection, unspecified	ICD9CM
634.51	Spontaneous abortion, complicated by shock, incomplete	ICD9CM
637.71	Unspecified abortion, with other specified complications, incomplete	ICD9CM
637.01	Unspecified abortion, complicated by genital tract and pelvic infection, incomplete	ICD9CM
634.42	Spontaneous abortion, complicated by metabolic disorder, complete	ICD9CM
634.1	Spontaneous abortion complicated by delayed or excessive hemorrhage	ICD9CM
637.7	Unspecified abortion, with other specified complications, unspecified	ICD9CM
634.41	Spontaneous abortion, complicated by metabolic disorder, incomplete	ICD9CM
634.8	Spontaneous abortion with unspecified complication	ICD9CM
637.82	Unspecified abortion, with unspecified complication, complete	ICD9CM
637	Unspecified abortion complicated by genital tract and pelvic infection	ICD9CM
634.5	Spontaneous abortion, complicated by shock, unspecified	ICD9CM
637.8	Unspecified abortion, with unspecified complication, unspecified	ICD9CM
637.81	Unspecified abortion, with unspecified complication, incomplete	ICD9CM
634.2	Spontaneous abortion complicated by damage to pelvic organs or tissues	ICD9CM
634.52	Spontaneous abortion, complicated by shock, complete	ICD9CM
637	Unspecified abortion	ICD9CM
634.32	Spontaneous abortion, complicated by renal failure, complete	ICD9CM
634.4	Spontaneous abortion, complicated by metabolic disorder, unspecified	ICD9CM
637.21	Unspecified abortion, complicated by damage to pelvic organs or tissues, incomplete	ICD9CM
634.7	Spontaneous abortion with other specified complications	ICD9CM
634.6	Spontaneous abortion, complicated by embolism, unspecified	ICD9CM
634.22	Spontaneous abortion, complicated by damage to pelvic organs or tissues, complete	ICD9CM
634.4	Spontaneous abortion complicated by metabolic disorder	ICD9CM
634.61	Spontaneous abortion, complicated by embolism, incomplete	ICD9CM
637.51	Unspecified abortion, complicated by shock, incomplete	ICD9CM
634.62	Spontaneous abortion, complicated by embolism, complete	ICD9CM
634.21	Spontaneous abortion, complicated by damage to pelvic organs or tissues, incomplete	ICD9CM
637.1	Unspecified abortion complicated by delayed or excessive hemorrhage	ICD9CM
634.3	Spontaneous abortion, complicated by renal failure, unspecified	ICD9CM
634.2	Spontaneous abortion, complicated by damage to pelvic organs or tissues, unspecified	ICD9CM
634.31	Spontaneous abortion, complicated by renal failure, incomplete	ICD9CM
637.02	Unspecified abortion, complicated by genital tract and pelvic infection, complete	ICD9CM
637.8	Unspecified abortion with unspecified complication	ICD9CM
637.3	Unspecified abortion complicated by renal failure	ICD9CM
637.42	Unspecified abortion, complicated by metabolic disorder, complete	ICD9CM
634.5	Spontaneous abortion complicated by shock	ICD9CM
634.3	Spontaneous abortion complicated by renal failure	ICD9CM
637.41	Unspecified abortion, complicated by metabolic disorder, incomplete	ICD9CM
637.22	Unspecified abortion, complicated by damage to pelvic organs or tissues, complete	ICD9CM
637.61	Unspecified abortion, complicated by embolism, incomplete	ICD9CM
637.3	Unspecified abortion, complicated by renal failure, unspecified	ICD9CM
637.6	Unspecified abortion, complicated by embolism, unspecified	ICD9CM
637.6	Unspecified abortion complicated by embolism	ICD9CM
637.5	Unspecified abortion, complicated by shock, unspecified	ICD9CM
634.6	Spontaneous abortion complicated by embolism	ICD9CM
637.2	Unspecified abortion complicated by damage to pelvic organs or tissues	ICD9CM
637.72	Unspecified abortion, with other specified complications, complete	ICD9CM
637.4	Unspecified abortion, complicated by metabolic disorder, unspecified	ICD9CM
637.32	Unspecified abortion, complicated by renal failure, complete	ICD9CM
637.62	Unspecified abortion, complicated by embolism, complete	ICD9CM
637.31	Unspecified abortion, complicated by renal failure, incomplete	ICD9CM
637.5	Unspecified abortion complicated by shock	ICD9CM
637.7	Unspecified abortion with other specified complications	ICD9CM
637.4	Unspecified abortion complicated by metabolic disorder	ICD9CM
637.52	Unspecified abortion, complicated by shock, complete	ICD9CM
637.2	Unspecified abortion, complicated by damage to pelvic organs or tissues, unspecified	ICD9CM
644.21	Early onset of delivery, delivered, with or without mention of antepartum condition	ICD9CM
644.03	Threatened premature labor, antepartum condition or complication	ICD9CM
644.13	Other threatened labor, antepartum condition or complication	ICD9CM
644.1	Other threatened labor, unspecified as to episode of care or not applicable	ICD9CM
644	Threatened premature labor, unspecified as to episode of care or not applicable	ICD9CM
644.2	Early onset of delivery, unspecified as to episode of care or not applicable	ICD9CM
644	Early or threatened labor	ICD9CM
644	Threatened premature labor	ICD9CM
644.2	Early onset of delivery	ICD9CM
644.1	Other threatened labor	ICD9CM
656.41	Intrauterine death, affecting management of mother, delivered, with or without mention of antepartum condition	ICD9CM
V27.1	Outcome of delivery, single stillborn	ICD9CM
656.43	Intrauterine death, affecting management of mother, antepartum condition or complication	ICD9CM
667.14	Retained portions of placenta or membranes, without hemorrhage, postpartum condition or complication	ICD9CM
667.1	Retained portions of placenta or membranes, without hemorrhage, unspecified as to episode of care or not applicable	ICD9CM
V27.3	Outcome of delivery, twins, one liveborn and one stillborn	ICD9CM
656.4	Intrauterine death, affecting management of mother, unspecified as to episode of care or not applicable	ICD9CM
V32.01	Twin birth, mate stillborn, born in hospital, delivered by cesarean section	ICD9CM
V27.4	Outcome of delivery, twins, both stillborn	ICD9CM
V32.00	Twin birth, mate stillborn, born in hospital, delivered without mention of cesarean section	ICD9CM
V36.01	Other multiple birth (three or more), mates liveborn and stillborn, born in hospital, delivered without mention of cesarean section	ICD9CM
V36.00	Other multiple birth (three or more), mates liveborn and stillborn, born in hospital, delivered without mention of cesarean section	ICD9CM
V27.6	Outcome of delivery, other multiple birth, some liveborn	ICD9CM
656.4	Intrauterine death affecting management of mother	ICD9CM
V27.7	Outcome of delivery, other multiple birth, all stillborn	ICD9CM
768	Fetal death from asphyxia or anoxia before onset of labor or at unspecified time	ICD9CM
V32.1	Twin birth, mate stillborn, born before admission to hospital	ICD9CM
667.1	Retained portions of placenta or membranes, without hemorrhage	ICD9CM
V32.0	Twin, mate stillborn, born in hospital	ICD9CM
V35.01	Other multiple birth (three or more), mates all still born, born in hospital, delivered by cesarean section	ICD9CM
V35.0	Other multiple, mates all stillborn, born in hospital	ICD9CM
V36	Other multiple birth (three or more), mates liveborn and stillborn	ICD9CM
V36.1	Other multiple birth (three or more), mates liveborn and stillborn, born before admission to hospital	ICD9CM
V32.2	Twin birth, mate stillborn, born outside hospital and not hospitalized	ICD9CM
V35.00	Other multiple birth (three or more), mates all still born, born in hospital, delivered without mention of cesarean section	ICD9CM
V35.1	Other multiple birth (three or more), mates all stillborn, born before admission to hospital	ICD9CM
V36.0	Other multiple, mates liveborn and stillborn, born in hospital	ICD9CM
V32	Twin birth, mate stillborn	ICD9CM
V35	Other multiple birth (three or more), mates all stillborn	ICD9CM
V33	Twin birth, unspecified whether mate liveborn or stillborn	ICD9CM
V35.2	Other multiple birth (three or more), mates all stillborn, born outside of hospital and not hospitalized	ICD9CM
V37	Other multiple birth (three or more), unspecified whether mates liveborn or stillborn	ICD9CM
V36.2	Other multiple birth (three or more), mates liveborn and stillborn, born outside hospital and not hospitalized	ICD9CM
O30	Multiple gestation	KCD7
O30.0	Twin pregnancy	KCD7
O30.1	Triplet pregnancy	KCD7
O30.2	Quadruplet pregnancy	KCD7
O30.8	Other multiple gestation	KCD7
O30.9	Multiple gestation, unspecified	KCD7

## Sheet: ST3. Significance thresholds
Analysis	Number of tests	Bonferroni-corrected p value threshold (.05/# of tests)
Submucosal main analysis	1701	2.93945e-05
Submucosal pregnant subset analysis	1570	3.18471e-05
Submucosal White analysis	1686	2.9656e-05
Submucosal Black analysis	1638	3.0525e-05
Submucosal Asian analysis	1219	4.10172e-05
Submucosal subtype indication analysis	1650	3.0303e-05
Intramural main analysis	1699	2.94291e-05
Intramural pregnant subset analysis	1556	3.21337e-05
Intramural White analysis	1686	2.9656e-05
Intramural Black analysis	1637	3.05437e-05
Intramural Asian analysis	1180	4.23729e-05
Intramural subtype indication analysis	1652	3.02663e-05
Subserosal main analysis	1698	2.94464e-05
Subserosal pregnant subset analysis	1556	3.21337e-05
Subserosal White analysis	1681	2.97442e-05
Subserosal Black analysis	1640	3.04878e-05
Subserosal Asian analysis	1203	4.15628e-05
Subserosal subtype indication analysis	1650	3.0303e-05

## Sheet: ST4. Demographics
	Vanderbilt SD (Discovery)
	Submucosal Cases (N = 2,445)	Submucosal Controls (N = 28,747)	Intramural Cases (N = 4,877)	Intramural Controls (N = 20,316)	Subserosal Cases (N = 3,472)	Subserosal Controls (N = 24,448)
Mean Age at Diagnosis (SD)	43.9 (10.0)	44.3 (12.0)	44.2 (10.5)	44.3 (12.4)	43.6 (10.6)	44.8 (12.1)
Age at Diagnosis Unpaired T-test	t = -1.93, p = 0.054		t = -0.32, p = 0.748		t = -6.23, p = 4.96e-10
Race (% of total)
White	50.5	59.8	53	60.4	54.6	60.2
Black	37.5	25.4	35	24.6	32.9	25.4
Asian	3	2.8	3	2.7	3.2	2.7
Other, Mixed, Unspecified	9	12	9	12.3	9.3	11.7
Chi-Squared Statistics of Race Distributions (alpha < 0.05)	chi-square statistic = 176.4, p < 2.2e-16		chi-square statistic = 233.7, p < 2.2e-16		chi-square statistic = 98.0, p < 2.2e-16
Median Number of PheCodes	29	17	29	17	28	18
Wilcoxon rank sum test	W = 44296718, p < 2.2e-16		W = 62506502, p < 2.2e-16		W = 52520380, p < 2.2e-16
Mean Number of PheCodes (SD)	41.3 (37.8)	30.2 (35.0)	41.0 (38.0)	30.2 (36.2)	39.9 (36.6)	30.9 (36.1)
	All of Us (Replication)
	Submucosal Cases (N = 1,156)	Submucosal Controls (N = 8,308)	Intramural Cases (N = 2,889)	Intramural Controls (N = 5,941)	Subserosal Cases (N = 1,269)	Subserosal Controls (N = 7,857)
Mean Age at Diagnosis (SD)	46.8 (9.4)	48.6 (10.7)	47.6 (10.2)	48.6 (10.5)	46.9 (10.8)	48.8 *10.4)
Age at Diagnosis Unpaired T-test	t = 6.01, p = 2.33e-9		t = 4.32, p = 1.59e-5		t = 5.89, p = 4.63e-9
Race (% of total)
White	36.2	39.6	34.1987	41.6933	35.3034	39.8116
Black	34.6	30.5	30.6681	31.2405	31.9149	31.0806
Asian	3.7	2.8	3.42679	2.60899	3.38849	2.69823
Admixed American	0.7	0.8	0.415369	0.858441	0.551615	0.801833
Middle Eastern	0.2	0.5	0.484597	0.504965	0.472813	0.496373
Native Hawaiin or Pacific Islander	0	0	0.0346141	0	0	0.025455
Other, Mixed, Unspecified	24.7	25.7	30.7719	23.0938	28.3688	25.0859
Chi-Squared Statistics of Race Distributions (alpha < 0.05)	chi-square statistic = 14.71, p = 0.02		chi-square statistic = 84.72, p = 3.77e-16		chi-square statistic = 13.61, p = 0.03
Median Number of PheCodes	47	48	46	48	45	49
Wilcoxon rank sum test	W = 4772430, p = 0.57		W = 8594705, p = 0.10		W = 5169184, p = 0.002
Mean Number of PheCodes (SD)	56.4 (40.5)	57.1 (41.0)	55.4 (39.5)	57.1 (41.1)	53.8 (38.6)	58.0 (41.7)

## Sheet: ST5. Submucosal primary
phenotype	predictor	predictor phecode	phecode group	beta	SE	OR	LCI	UCI	p	n_total	n_cases	n_controls	Bonferroni-corrected significant?
submucosal	626	Disorders of menstruation and other abnormal bleeding from female genital tract	genitourinary	1.67638	0.0560217	5.34618	4.79024	5.96665	9.64e-197	22237	1755	20482	TRUE
submucosal	280.2	Iron deficiency anemia secondary to blood loss (chronic)	hematopoietic	1.64867	0.0703135	5.20006	4.53061	5.96844	1.4e-121	22420	1569	20851	TRUE
submucosal	280	Iron deficiency anemias	hematopoietic	1.22042	0.0559969	3.38862	3.03639	3.78171	2.62e-105	24372	1828	22544	TRUE
submucosal	626.2	Dysmenorrhea	genitourinary	1.64612	0.08321	5.18679	4.40625	6.1056	4.2e-87	16671	825	15846	TRUE
submucosal	619	Noninflammatory female genital disorders	genitourinary	0.988068	0.050071	2.68604	2.43496	2.96302	1.12e-86	24449	1834	22615	TRUE
submucosal	215	Other benign neoplasm of connective and other soft tissue	neoplasms	1.26138	0.0687672	3.53027	3.08512	4.03966	3.78e-75	29371	2168	27203	TRUE
submucosal	619.2	Disorders of uterus, NEC	genitourinary	1.18549	0.0676845	3.2723	2.86575	3.73652	1.1e-68	20006	1291	18715	TRUE
submucosal	627.2	Symptomatic menopause	genitourinary	1.51876	0.0887141	4.56654	3.83771	5.43378	1.06e-65	16467	780	15687	TRUE
submucosal	627	Menopausal and postmenopausal disorders	genitourinary	1.36183	0.0796719	3.90334	3.33901	4.56304	1.67e-65	17744	910	16834	TRUE
submucosal	280.1	Iron deficiency anemias, unspecified or not due to blood loss	hematopoietic	1.02942	0.0644482	2.79945	2.46725	3.17638	1.97e-57	23545	1615	21930	TRUE
submucosal	623	Hypertrophy of female genital organs	genitourinary	1.35045	0.0857244	3.85917	3.2623	4.56525	6.51e-56	24842	1555	23287	TRUE
submucosal	285	Other anemias	hematopoietic	0.816172	0.0539977	2.26183	2.03468	2.51433	1.29e-51	25941	1861	24080	TRUE
submucosal	622	Polyp of female genital organs	genitourinary	1.05174	0.0715797	2.86264	2.48792	3.29379	7.12e-49	25798	1644	24154	TRUE
submucosal	626.8	Infertility, female	genitourinary	1.59767	0.109983	4.9415	3.98326	6.13026	8.24e-48	15781	664	15117	TRUE
submucosal	626.1	Irregular menstrual cycle/bleeding	genitourinary	1.49556	0.105286	4.46185	3.62989	5.48449	8.56e-46	15823	675	15148	TRUE
submucosal	622.1	Polyp of corpus uteri	genitourinary	1.04289	0.0800286	2.83742	2.4255	3.31929	8.1e-39	25347	1576	23771	TRUE
submucosal	654.1	Abnormality of organs and soft tissues of pelvis complicating pregnancy, childbirth, or the puerperium	pregnancy complications	-1.26549	0.101307	0.2821	0.231296	0.344063	8.29e-36	28013	2338	25675	TRUE
submucosal	619.4	Noninflammatory disorders of vagina	genitourinary	1.0645	0.0862611	2.89938	2.44837	3.43346	5.49e-35	19016	1133	17883	TRUE
submucosal	338	Pain	neurological	0.535629	0.0518373	1.70852	1.54346	1.89123	5e-25	27777	2051	25726	TRUE
submucosal	610	Benign mammary dysplasias	genitourinary	0.758794	0.0748986	2.1357	1.8441	2.4734	4.03e-24	25667	1837	23830	TRUE
submucosal	655	Known or suspected fetal abnormality affecting management of mother	pregnancy complications	-0.917172	0.0928094	0.399648	0.333178	0.479378	4.97e-23	29593	2385	27208	TRUE
submucosal	614	Inflammatory diseases of female pelvic organs	genitourinary	0.590855	0.0598616	1.80553	1.60565	2.0303	5.6e-23	25369	1796	23573	TRUE
submucosal	615	Endometriosis	genitourinary	0.790383	0.0810985	2.20424	1.8803	2.58399	1.92e-22	23120	1531	21589	TRUE
submucosal	338.1	Acute pain	neurological	0.595696	0.0619059	1.81429	1.60699	2.04834	6.42e-22	25084	1776	23308	TRUE
submucosal	649	Other conditions or status of the mother complicating pregnancy, childbirth, or the puerperium	pregnancy complications	-0.939842	0.0977238	0.390689	0.322587	0.473169	6.76e-22	29399	2358	27041	TRUE
submucosal	628	Ovarian cyst	genitourinary	0.816362	0.086564	2.26225	1.90922	2.68056	4.07e-21	17598	752	16846	TRUE
submucosal	610.1	Cystic mastopathy	genitourinary	0.757108	0.0845587	2.1321	1.80647	2.51643	3.44e-19	25210	1772	23438	TRUE
submucosal	285.1	Acute posthemorrhagic anemia	hematopoietic	0.80368	0.0923076	2.23375	1.86406	2.67675	3.13e-18	22223	1360	20863	TRUE
submucosal	611	Abnormal findings on mammogram or breast exam	genitourinary	0.647004	0.0743115	1.90981	1.65095	2.20925	3.13e-18	25861	1847	24014	TRUE
submucosal	654	Other and unspecified complications of birth; puerperium affecting management of mother	pregnancy complications	-1.06158	0.130926	0.345909	0.267618	0.447103	5.14e-16	26309	2288	24021	TRUE
submucosal	614.4	Inflammatory diseases of uterus, except cervix	genitourinary	1.37312	0.169954	3.94763	2.82923	5.50814	6.51e-16	21726	1370	20356	TRUE
submucosal	338.2	Chronic pain	neurological	0.489044	0.0622687	1.63076	1.44339	1.84244	4.04e-15	25360	1782	23578	TRUE
submucosal	785	Abdominal pain	symptoms	0.368183	0.046884	1.44511	1.31823	1.58419	4.06e-15	27301	2160	25141	TRUE
submucosal	619.3	Noninflammatory disorders of cervix	genitourinary	0.99708	0.128478	2.71036	2.107	3.4865	8.45e-15	18290	1008	17282	TRUE
submucosal	745	Pain in joint	musculoskeletal	0.390691	0.0505022	1.478	1.33871	1.63179	1.02e-14	28606	2225	26381	TRUE
submucosal	614.5	Inflammatory disease of cervix, vagina, and vulva	genitourinary	0.541081	0.0718974	1.71786	1.49207	1.97783	5.24e-14	23991	1627	22364	TRUE
submucosal	622.2	Mucous polyp of cervix	genitourinary	1.10002	0.149994	3.00422	2.239	4.03097	2.24e-13	24234	1414	22820	TRUE
submucosal	261	Vitamin deficiency	endocrine/metabolic	0.422414	0.0582259	1.52564	1.3611	1.71007	4.02e-13	28385	2154	26231	TRUE
submucosal	726	Peripheral enthesopathies and allied syndromes	musculoskeletal	0.464067	0.0642319	1.59053	1.40238	1.80392	5.02e-13	26651	1979	24672	TRUE
submucosal	327	Sleep disorders	neurological	0.448367	0.0622905	1.56575	1.3858	1.76907	6.11e-13	28265	2185	26080	TRUE
submucosal	636	Early or threatened labor; hemorrhage in early pregnancy	pregnancy complications	-0.672383	0.0936366	0.510491	0.424896	0.613328	6.93e-13	28398	2314	26084	TRUE
submucosal	655.1	Abnormality in fetal heart rate or rhythm	pregnancy complications	-1.1054	0.157216	0.331079	0.24328	0.450564	2.05e-12	27499	2292	25207	TRUE
submucosal	621	Endometrial hyperplasia	genitourinary	0.971729	0.138924	2.64251	2.01262	3.46954	2.66e-12	24352	1423	22929	TRUE
submucosal	261.4	Vitamin D deficiency	endocrine/metabolic	0.429481	0.0617148	1.53646	1.36141	1.73402	3.42e-12	27771	2092	25679	TRUE
submucosal	465	Acute upper respiratory infections of multiple or unspecified sites	respiratory	0.369727	0.0533224	1.44734	1.30371	1.60679	4.1e-12	26080	1989	24091	TRUE
submucosal	241	Nontoxic nodular goiter	endocrine/metabolic	0.537687	0.0775866	1.71204	1.47052	1.99323	4.2e-12	26644	2065	24579	TRUE
submucosal	271	Disorders of carbohydrate transport and metabolism	endocrine/metabolic	0.576406	0.083686	1.77963	1.51041	2.09684	5.67e-12	30600	2370	28230	TRUE
submucosal	271.3	Intestinal disaccharidase deficiencies and disaccharide malabsorption	endocrine/metabolic	0.577203	0.0838906	1.78105	1.51101	2.09935	5.97e-12	30592	2369	28223	TRUE
submucosal	611.1	Abnormal mammogram	genitourinary	0.718893	0.104809	2.05216	1.67107	2.52015	6.93e-12	24659	1699	22960	TRUE
submucosal	476	Allergic rhinitis	respiratory	0.427847	0.0626708	1.53395	1.35664	1.73444	8.68e-12	25035	1870	23165	TRUE
submucosal	300.1	Anxiety disorder	mental disorders	0.384889	0.0564058	1.46945	1.31565	1.64123	8.88e-12	25298	1902	23396	TRUE
submucosal	627.3	Postmenopausal atrophic vaginitis	genitourinary	0.890611	0.13083	2.43662	1.88548	3.14885	9.94e-12	15827	623	15204	TRUE
submucosal	611.3	Lump or mass in breast	genitourinary	0.611719	0.0908077	1.8436	1.54301	2.20274	1.62e-11	25072	1743	23329	TRUE
submucosal	262	Mineral deficiency NEC	endocrine/metabolic	0.80257	0.12103	2.23127	1.76007	2.82862	3.33e-11	24826	1773	23053	TRUE
submucosal	649.1	Diabetes or abnormal glucose tolerance complicating pregnancy	pregnancy complications	-1.04438	0.15838	0.351911	0.257998	0.480008	4.28e-11	27611	2278	25333	TRUE
submucosal	638	Other high-risk pregnancy	pregnancy complications	-1.04405	0.159584	0.352025	0.257474	0.481298	6.06e-11	30491	2415	28076	TRUE
submucosal	613.8	Other specified disorders of breast	genitourinary	0.694803	0.106483	2.00331	1.62596	2.46825	6.8e-11	27169	2000	25169	TRUE
submucosal	300	Anxiety disorders	mental disorders	0.358144	0.0549362	1.43067	1.28463	1.59332	7.06e-11	25797	1942	23855	TRUE
submucosal	773	Pain in limb	symptoms	0.373555	0.0576451	1.45289	1.29767	1.62668	9.16e-11	29352	2255	27097	TRUE
submucosal	613	Other nonmalignant breast conditions	genitourinary	0.434603	0.0670822	1.54435	1.35408	1.76136	9.25e-11	29078	2197	26881	TRUE
submucosal	512	Other symptoms of respiratory system	respiratory	0.324416	0.0504246	1.38322	1.25305	1.52691	1.25e-10	27775	2145	25630	TRUE
submucosal	653	Problems associated with amniotic cavity and membranes	pregnancy complications	-1.07065	0.167148	0.342786	0.247027	0.475666	1.5e-10	25566	2263	23303	TRUE
submucosal	530.1	Esophagitis, GERD and related diseases	digestive	0.36161	0.0569954	1.43564	1.2839	1.60532	2.23e-10	27682	2103	25579	TRUE
submucosal	530	Diseases of esophagus	digestive	0.356945	0.0563273	1.42896	1.2796	1.59575	2.34e-10	27868	2119	25749	TRUE
submucosal	646	Other complications of pregnancy NEC	pregnancy complications	-0.960384	0.153688	0.382746	0.283197	0.517288	4.13e-10	30175	2405	27770	TRUE
submucosal	599	Other symptoms/disorders or the urinary system	genitourinary	0.342304	0.05551	1.40819	1.26302	1.57004	6.98e-10	27520	2094	25426	TRUE
submucosal	530.11	GERD	digestive	0.353024	0.0577735	1.42336	1.27098	1.59402	9.93e-10	27529	2084	25445	TRUE
submucosal	701	Other hypertrophic and atrophic conditions of skin	dermatologic	0.512076	0.0838651	1.66875	1.41581	1.96689	1.02e-09	29156	2215	26941	TRUE
submucosal	614.52	Vaginitis and vulvovaginitis	genitourinary	0.496296	0.0820425	1.64263	1.39863	1.92919	1.46e-09	23332	1544	21788	TRUE
submucosal	704	Diseases of hair and hair follicles	dermatologic	0.541228	0.0896043	1.71812	1.44138	2.04798	1.54e-09	28578	2147	26431	TRUE
submucosal	619.1	Noninflammatory disorders of ovary, fallopian tube, and broad ligament	genitourinary	0.659124	0.109462	1.9331	1.55983	2.39569	1.73e-09	18800	1035	17765	TRUE
submucosal	706	Diseases of sebaceous glands	dermatologic	0.464785	0.0776845	1.59167	1.36687	1.85345	2.19e-09	28867	2192	26675	TRUE
submucosal	418	Nonspecific chest pain	circulatory system	0.326432	0.0548481	1.38601	1.24474	1.54332	2.66e-09	27680	2126	25554	TRUE
submucosal	327.4	Insomnia	neurological	0.446569	0.0753595	1.56294	1.34833	1.81171	3.11e-09	27045	2041	25004	TRUE
submucosal	617	Disorders secondary to childbirth, surgery, trauma	genitourinary	0.601904	0.101641	1.82559	1.49584	2.22804	3.18e-09	29667	2260	27407	TRUE
submucosal	627.21	Symptomatic artificial menopause	genitourinary	1.41295	0.238642	4.10806	2.57336	6.55803	3.2e-09	15022	556	14466	TRUE
submucosal	626.4	Premenstrual tension syndromes	genitourinary	1.69782	0.288937	5.46205	3.10033	9.62284	4.2e-09	14962	549	14413	TRUE
submucosal	216	Benign neoplasm of skin	neoplasms	0.432686	0.0743496	1.54139	1.33237	1.7832	5.9e-09	29522	2272	27250	TRUE
submucosal	610.4	Benign neoplasm of breast	genitourinary	0.858858	0.148122	2.36046	1.76569	3.15559	6.7e-09	24142	1635	22507	TRUE
submucosal	208	Benign neoplasm of colon	neoplasms	0.456859	0.0788257	1.57911	1.35305	1.84293	6.8e-09	29392	2227	27165	TRUE
submucosal	272.1	Hyperlipidemia	endocrine/metabolic	0.326578	0.0564219	1.38622	1.24109	1.54831	7.12e-09	29595	2307	27288	TRUE
submucosal	272	Disorders of lipoid metabolism	endocrine/metabolic	0.325687	0.0563513	1.38498	1.24016	1.54672	7.49e-09	29617	2309	27308	TRUE
submucosal	726.1	Enthesopathy	musculoskeletal	0.444879	0.0770943	1.5603	1.34148	1.81482	7.9e-09	25267	1825	23442	TRUE
submucosal	512.8	Cough	respiratory	0.373349	0.0660056	1.45259	1.27632	1.65321	1.55e-08	23154	1709	21445	TRUE
submucosal	635	Hemorrhage during pregnancy; childbirth and postpartum	pregnancy complications	-1.10908	0.198488	0.329863	0.223551	0.486732	2.3e-08	26608	2204	24404	TRUE
submucosal	704.2	Hirsutism	dermatologic	0.81953	0.147523	2.26943	1.69959	3.03034	2.77e-08	27677	2045	25632	TRUE
submucosal	665	Obstetrical/birth trauma	pregnancy complications	-1.17872	0.213839	0.307673	0.202333	0.467857	3.54e-08	30849	2435	28414	TRUE
submucosal	241.1	Nontoxic uninodular goiter	endocrine/metabolic	0.54807	0.0996788	1.72991	1.4229	2.10316	3.83e-08	25891	1969	23922	TRUE
submucosal	694.2	Other dyschromia	dermatologic	0.496523	0.0904485	1.643	1.37609	1.96168	4.03e-08	27339	2029	25310	TRUE
submucosal	619.5	Noninflammatory disorders of vulva and perineum	genitourinary	0.8903	0.162874	2.43586	1.77016	3.35192	4.6e-08	18098	977	17121	TRUE
submucosal	304	Adjustment reaction	mental disorders	0.498698	0.0915957	1.64658	1.37599	1.97038	5.19e-08	21433	1537	19896	TRUE
submucosal	464	Acute sinusitis	respiratory	0.400047	0.0737393	1.49189	1.29113	1.72388	5.79e-08	22080	1585	20495	TRUE
submucosal	612	Breast conditions, congenital or relating to hormones	genitourinary	0.709571	0.133345	2.03312	1.56552	2.64039	1.03e-07	24249	1649	22600	TRUE
submucosal	401.1	Essential hypertension	circulatory system	0.272343	0.0512914	1.31304	1.18745	1.4519	1.1e-07	29109	2285	26824	TRUE
submucosal	694	Dyschromia and Vitiligo	dermatologic	0.47346	0.0897587	1.60554	1.34653	1.91437	1.33e-07	27382	2031	25351	TRUE
submucosal	642	Hypertension complicating pregnancy, childbirth, and the puerperium	pregnancy complications	-0.653326	0.125573	0.520312	0.406794	0.665509	1.96e-07	30705	2422	28283	TRUE
submucosal	401	Hypertension	circulatory system	0.262242	0.0510506	1.29984	1.17607	1.43663	2.79e-07	29294	2295	26999	TRUE
submucosal	512.7	Shortness of breath	respiratory	0.325642	0.0638576	1.38492	1.22199	1.56957	3.41e-07	23414	1723	21691	TRUE
submucosal	947	Urticaria	dermatologic	0.662976	0.130353	1.94056	1.50303	2.50545	3.66e-07	26167	1909	24258	TRUE
submucosal	704.1	Alopecia	dermatologic	0.541755	0.106825	1.71902	1.39428	2.1194	3.95e-07	28175	2096	26079	TRUE
submucosal	761	Cervicalgia	symptoms	0.328884	0.0663635	1.38942	1.21995	1.58242	7.2e-07	29345	2253	27092	TRUE
submucosal	735	Acquired foot deformities	musculoskeletal	0.466587	0.0954291	1.59454	1.32253	1.9225	1.01e-06	28882	2220	26662	TRUE
submucosal	599.3	Dysuria	genitourinary	0.324527	0.0668484	1.38338	1.21349	1.57704	1.21e-06	25544	1892	23652	TRUE
submucosal	465.2	Acute pharyngitis	respiratory	0.344827	0.0717156	1.41175	1.22662	1.62481	1.52e-06	22299	1593	20706	TRUE
submucosal	687.4	Disturbance of skin sensation	dermatologic	0.396115	0.0831891	1.48604	1.26246	1.74921	1.92e-06	25676	1897	23779	TRUE
submucosal	112	Candidiasis	infectious diseases	0.403529	0.0848668	1.4971	1.26768	1.76803	1.99e-06	27357	2041	25316	TRUE
submucosal	599.9	Other abnormality of urination	genitourinary	0.513007	0.108324	1.67031	1.35079	2.0654	2.18e-06	23348	1680	21668	TRUE
submucosal	706.1	Acne	dermatologic	0.502484	0.106526	1.65282	1.34137	2.03659	2.39e-06	27919	2082	25837	TRUE
submucosal	644	Anemia during pregnancy	pregnancy complications	-0.817307	0.176193	0.441619	0.312658	0.623774	3.51e-06	30211	2406	27805	TRUE
submucosal	729	Other disorders of soft tissues	musculoskeletal	0.521207	0.112425	1.68406	1.35101	2.09921	3.55e-06	23811	1677	22134	TRUE
submucosal	296	Mood disorders	mental disorders	0.272731	0.0589415	1.31355	1.17024	1.47441	3.71e-06	24995	1842	23153	TRUE
submucosal	593	Hematuria	genitourinary	0.429934	0.0929866	1.53716	1.28105	1.84446	3.77e-06	23898	1791	22107	TRUE
submucosal	741	Symptoms and disorders of the joints	musculoskeletal	0.340744	0.0738714	1.40599	1.21647	1.62504	3.98e-06	29074	2203	26871	TRUE
submucosal	782.3	Edema	symptoms	0.347258	0.0753826	1.41518	1.2208	1.64051	4.09e-06	28719	2181	26538	TRUE
submucosal	296.22	Major depressive disorder	mental disorders	0.328483	0.0713188	1.38886	1.20768	1.59723	4.11e-06	22927	1662	21265	TRUE
submucosal	288.2	Elevated white blood cell count	hematopoietic	0.437124	0.0955458	1.54825	1.28384	1.86711	4.76e-06	26949	2005	24944	TRUE
submucosal	296.2	Depression	mental disorders	0.278458	0.0609709	1.32109	1.17229	1.48879	4.95e-06	24553	1803	22750	TRUE
submucosal	740.1	Osteoarthritis; localized	musculoskeletal	0.303261	0.066478	1.35427	1.18882	1.54274	5.07e-06	28658	2206	26452	TRUE
submucosal	386.9	Dizziness and giddiness (Light-headedness and vertigo)	sense organs	0.319459	0.0704445	1.37638	1.19888	1.58017	5.76e-06	28414	2153	26261	TRUE
submucosal	599.4	Urinary incontinence	genitourinary	0.427756	0.0947356	1.53381	1.27389	1.84677	6.32e-06	23763	1718	22045	TRUE
submucosal	242	Thyrotoxicosis with or without goiter	endocrine/metabolic	0.565168	0.125429	1.75974	1.3762	2.25018	6.61e-06	25470	1919	23551	TRUE
submucosal	636.3	Hemorrhage in early pregnancy	pregnancy complications	-0.511924	0.113637	0.599342	0.479672	0.748866	6.64e-06	27288	2267	25021	TRUE
submucosal	288	Diseases of white blood cells	hematopoietic	0.406237	0.0905163	1.50116	1.25712	1.79257	7.19e-06	27126	2022	25104	TRUE
submucosal	281	Other deficiency anemia	hematopoietic	0.65809	0.146817	1.9311	1.44821	2.57501	7.38e-06	21501	1261	20240	TRUE
submucosal	760	Back pain	symptoms	0.254933	0.0570291	1.29038	1.15391	1.44298	7.81e-06	28484	2206	26278	TRUE
submucosal	740	Osteoarthrosis	musculoskeletal	0.277658	0.0622611	1.32004	1.16839	1.49136	8.21e-06	29493	2277	27216	TRUE
submucosal	479	Other upper respiratory disease	respiratory	0.382794	0.085964	1.46638	1.239	1.73548	8.47e-06	22914	1634	21280	TRUE
submucosal	764	Sciatica	symptoms	0.391962	0.0885096	1.47988	1.24419	1.76022	9.49e-06	28159	2146	26013	TRUE
submucosal	635.2	Antepartum hemorrhage, abruptio placentae, and placenta previa	pregnancy complications	-1.04394	0.235975	0.352063	0.221694	0.559097	9.69e-06	26344	2196	24148	TRUE
submucosal	367	Disorders of refraction and accommodation; blindness and low vision	sense organs	0.323241	0.0736498	1.3816	1.19589	1.59615	1.14e-05	30208	2340	27868	TRUE
submucosal	110.1	Dermatophytosis	infectious diseases	0.451458	0.102963	1.5706	1.28358	1.92181	1.16e-05	26839	1983	24856	TRUE
submucosal	783	Fever of unknown origin	symptoms	0.308224	0.0705161	1.36101	1.18532	1.56273	1.24e-05	28351	2193	26158	TRUE
submucosal	612.2	Hypertrophy of breast (Gynecomastia)	genitourinary	0.684727	0.157291	1.98323	1.45708	2.69937	1.34e-05	24110	1628	22482	TRUE
submucosal	241.2	Nontoxic multinodular goiter	endocrine/metabolic	0.453461	0.104379	1.57375	1.28259	1.93101	1.4e-05	25857	1956	23901	TRUE
submucosal	740.11	Osteoarthrosis, localized, primary	musculoskeletal	0.293293	0.0675542	1.34084	1.17455	1.53066	1.41e-05	28518	2190	26328	TRUE
submucosal	763	Thoracic or lumbosacral neuritis or radiculitis, unspecified	symptoms	0.39622	0.0914442	1.4862	1.24233	1.77793	1.47e-05	28090	2136	25954	TRUE
submucosal	367.8	Hypermetropia	sense organs	0.782785	0.181088	2.18756	1.53396	3.11964	1.54e-05	28204	2133	26071	TRUE
submucosal	272.13	Mixed hyperlipidemia	endocrine/metabolic	0.303785	0.0703817	1.35498	1.18038	1.5554	1.59e-05	26957	2042	24915	TRUE
submucosal	110	Dermatophytosis / Dermatomycosis	infectious diseases	0.428532	0.0993097	1.535	1.2635	1.86485	1.6e-05	26937	1992	24945	TRUE
submucosal	627.5	Premature menopause and other ovarian failure	genitourinary	1.59873	0.371456	4.94674	2.38852	10.2449	1.68e-05	14922	543	14379	TRUE
submucosal	789	Nausea and vomiting	symptoms	0.250165	0.0581603	1.28424	1.14588	1.4393	1.7e-05	27951	2153	25798	TRUE
submucosal	728.7	Fasciitis	musculoskeletal	0.526353	0.122469	1.69275	1.33151	2.15199	1.72e-05	23697	1659	22038	TRUE
submucosal	340	Migraine	neurological	0.317361	0.0738253	1.3735	1.18847	1.58734	1.72e-05	28287	2155	26132	TRUE
submucosal	625	Pain and other symptoms associated with female genital organs	genitourinary	0.45966	0.108307	1.58354	1.28066	1.95804	2.2e-05	28285	2113	26172	TRUE
submucosal	244.1	Secondary hypothyroidism	endocrine/metabolic	0.494588	0.116587	1.63982	1.30484	2.06081	2.21e-05	25641	1931	23710	TRUE
submucosal	614.32	Chronic inflammatory pelvic disease	genitourinary	0.699084	0.165696	2.01191	1.454	2.78389	2.45e-05	21854	1367	20487	TRUE
submucosal	661	Fetal distress and abnormal forces of labor	pregnancy complications	-2.11791	0.502148	0.120283	0.0449539	0.321841	2.47e-05	30842	2435	28407	TRUE
submucosal	339	Other headache syndromes	neurological	0.389875	0.0928381	1.4768	1.2311	1.77152	2.67e-05	27245	2060	25185	TRUE
submucosal	272.11	Hypercholesterolemia	endocrine/metabolic	0.339423	0.0809913	1.40414	1.19803	1.6457	2.78e-05	26030	1953	24077	TRUE
submucosal	702	Degenerative skin conditions and other dermatoses	dermatologic	0.372157	0.0890802	1.45086	1.21843	1.72764	2.94e-05	27908	2048	25860	FALSE
submucosal	591	Urinary tract infection	genitourinary	0.269145	0.0645473	1.30884	1.15331	1.48536	3.05e-05	26060	1998	24062	FALSE
submucosal	381	Otitis media and Eustachian tube disorders	sense organs	0.322113	0.0776019	1.38004	1.18532	1.60675	3.31e-05	28298	2167	26131	FALSE
submucosal	611.11	Mammographic microcalcification	genitourinary	0.632878	0.15293	1.88302	1.39534	2.54116	3.5e-05	24186	1631	22555	FALSE
submucosal	455	Hemorrhoids	circulatory system	0.357389	0.0864684	1.42959	1.20673	1.69362	3.58e-05	27138	2044	25094	FALSE
submucosal	327.32	Obstructive sleep apnea	neurological	0.310638	0.075384	1.3643	1.1769	1.58153	3.78e-05	27205	2040	25165	FALSE
submucosal	214	Lipoma	neoplasms	0.5885	0.143103	1.80128	1.36073	2.38448	3.92e-05	28363	1914	26449	FALSE
submucosal	381.2	Eustachian tube disorders	sense organs	0.390157	0.0956374	1.47721	1.22471	1.78177	4.51e-05	27473	2087	25386	FALSE
submucosal	79.9	Viremia, NOS	infectious diseases	0.796392	0.195489	2.21752	1.5117	3.25291	4.62e-05	25003	1843	23160	FALSE
submucosal	495	Asthma	respiratory	0.285382	0.0707207	1.33027	1.15809	1.52805	5.45e-05	28103	2158	25945	FALSE
submucosal	512.9	Other dyspnea	respiratory	0.296644	0.0737258	1.34534	1.16432	1.55449	5.73e-05	22252	1594	20658	FALSE
submucosal	721	Spondylosis and allied disorders	musculoskeletal	0.324073	0.0809065	1.38275	1.17998	1.62036	6.19e-05	27593	2093	25500	FALSE
submucosal	454.1	Varicose veins of lower extremity	circulatory system	0.594207	0.148961	1.81159	1.35289	2.42582	6.63e-05	25990	1925	24065	FALSE
submucosal	687.1	Rash and other nonspecific skin eruption	dermatologic	0.331112	0.0832537	1.39252	1.18286	1.63933	6.97e-05	25790	1898	23892	FALSE
submucosal	327.3	Sleep apnea	neurological	0.280062	0.0710442	1.32321	1.15121	1.52091	8.08e-05	27598	2075	25523	FALSE
submucosal	741.2	Stiffness of joint	musculoskeletal	0.403304	0.102586	1.49676	1.22414	1.8301	8.45e-05	27802	2069	25733	FALSE
submucosal	727	Other disorders of synovium, tendon, and bursa	musculoskeletal	0.319148	0.0814761	1.37595	1.17287	1.6142	8.96e-05	25091	1787	23304	FALSE
submucosal	706.2	Sebaceous cyst	dermatologic	0.465475	0.119066	1.59277	1.26125	2.01143	9.25e-05	27765	2060	25705	FALSE
submucosal	634	Miscarriage; stillbirth	pregnancy complications	-0.433148	0.111193	0.648465	0.521479	0.806372	9.8e-05	27260	2271	24989	FALSE
submucosal	214.1	Lipoma of skin and subcutaneous tissue	neoplasms	0.655778	0.169077	1.92664	1.38318	2.68363	0.00010507	28211	1897	26314	FALSE
submucosal	285.2	Anemia of chronic disease	hematopoietic	0.434745	0.112873	1.54457	1.23802	1.92702	0.00011733	22039	1305	20734	FALSE
submucosal	562	Diverticulosis and diverticulitis	digestive	0.349182	0.0907967	1.41791	1.18675	1.69409	0.00012018	24189	1815	22374	FALSE
submucosal	327.71	Restless legs syndrome	neurological	0.565977	0.147349	1.76117	1.31939	2.35086	0.0001225	25409	1856	23553	FALSE
submucosal	1009	Injury, NOS	NULL	0.394389	0.102764	1.48348	1.21285	1.81449	0.00012414	31189	2445	28744	FALSE
submucosal	564	Functional digestive disorders	digestive	0.39447	0.103288	1.4836	1.2117	1.81651	0.00013392	23658	1758	21900	FALSE
submucosal	798	Malaise and fatigue	symptoms	0.452251	0.119534	1.57185	1.24354	1.98682	0.00015468	30545	2355	28190	FALSE
submucosal	798.1	Chronic fatigue syndrome	symptoms	0.453553	0.121657	1.57389	1.23999	1.99771	0.0001929	30519	2352	28167	FALSE
submucosal	472	Chronic pharyngitis and nasopharyngitis	respiratory	0.418627	0.112756	1.51987	1.21851	1.89578	0.00020506	22107	1552	20555	FALSE
submucosal	610.8	Other specified benign mammary dysplasias	genitourinary	0.604463	0.16297	1.83027	1.32982	2.51905	0.00020804	24141	1623	22518	FALSE
submucosal	626.15	Infertility, female, associated with anovulation	genitourinary	1.02441	0.276769	2.78545	1.61922	4.79167	0.00021448	15056	549	14507	FALSE
submucosal	721.1	Spondylosis without myelopathy	musculoskeletal	0.306062	0.0830968	1.35807	1.15395	1.59829	0.00023033	27497	2080	25417	FALSE
submucosal	689	Disorder of skin and subcutaneous tissue NOS	dermatologic	0.446619	0.121474	1.56302	1.23187	1.98319	0.00023631	29803	2295	27508	FALSE
submucosal	427.9	Palpitations	circulatory system	0.270989	0.0740904	1.31126	1.13402	1.5162	0.00025465	25924	1969	23955	FALSE
submucosal	261.2	Vitamin B-complex deficiencies	endocrine/metabolic	0.386644	0.105838	1.47203	1.19626	1.81137	0.00025903	25288	1798	23490	FALSE
submucosal	579	Other symptoms involving abdomen and pelvis	digestive	0.284261	0.078189	1.32878	1.13998	1.54885	0.00027738	27104	1993	25111	FALSE
submucosal	278	Overweight, obesity and other hyperalimentation	endocrine/metabolic	0.188861	0.0520302	1.20787	1.09077	1.33755	0.00028359	28586	2218	26368	FALSE
submucosal	532	Dysphagia	digestive	0.333035	0.0917562	1.3952	1.16555	1.67009	0.0002839	24270	1747	22523	FALSE
submucosal	382	Otalgia	sense organs	0.425262	0.117254	1.52999	1.21585	1.92529	0.0002869	26984	2040	24944	FALSE
submucosal	256	Ovarian dysfunction	endocrine/metabolic	0.38955	0.107743	1.47632	1.19527	1.82344	0.00029969	28098	2105	25993	FALSE
submucosal	281.1	Megaloblastic anemia	hematopoietic	0.649758	0.180197	1.91508	1.34524	2.7263	0.00031117	21333	1241	20092	FALSE
submucosal	614.3	Pelvic inflammatory disease (PID)	genitourinary	0.476546	0.132361	1.6105	1.24249	2.08752	0.0003178	22153	1392	20761	FALSE
submucosal	563	Constipation	digestive	0.307758	0.0855795	1.36037	1.1503	1.60881	0.00032294	29592	2284	27308	FALSE
submucosal	256.4	Polycystic ovaries	endocrine/metabolic	0.405191	0.112773	1.49959	1.2022	1.87054	0.00032691	28005	2096	25909	FALSE
submucosal	258.1	Postablative ovarian failure	endocrine/metabolic	1.02703	0.288143	2.79275	1.58767	4.91252	0.00036483	27212	2016	25196	FALSE
submucosal	367.2	Astigmatism	sense organs	0.453959	0.127645	1.57453	1.22602	2.02212	0.00037596	28567	2170	26397	FALSE
submucosal	246	Other disorders of thyroid	endocrine/metabolic	0.502092	0.14174	1.65217	1.25142	2.18126	0.00039661	25384	1900	23484	FALSE
submucosal	564.1	Irritable Bowel Syndrome	digestive	0.407148	0.115213	1.50253	1.19881	1.88318	0.0004095	23425	1733	21692	FALSE
submucosal	300.11	Generalized anxiety disorder	mental disorders	0.364923	0.103826	1.4404	1.17518	1.76548	0.00044018	21270	1493	19777	FALSE
submucosal	735.2	Acquired toe deformities	musculoskeletal	0.504001	0.143732	1.65533	1.24893	2.19398	0.000454	28212	2137	26075	FALSE
submucosal	327.1	Hypersomnia	neurological	0.573125	0.163676	1.7738	1.28701	2.44472	0.00046253	25295	1845	23450	FALSE
submucosal	480.3	Pneumonia due to fungus (mycoses)	respiratory	1.61612	0.46335	5.03353	2.02984	12.482	0.00048681	25428	1865	23563	FALSE
submucosal	278.1	Obesity	endocrine/metabolic	0.182564	0.0523435	1.20029	1.08326	1.32997	0.000487	28511	2208	26303	FALSE
submucosal	613.5	Mastodynia	genitourinary	0.327057	0.0938741	1.38688	1.1538	1.66704	0.00049398	27706	2028	25678	FALSE
submucosal	742	Derangement of joint, non-traumatic	musculoskeletal	0.471078	0.135476	1.60172	1.2282	2.08884	0.00050665	27308	2015	25293	FALSE
submucosal	704.8	Other specified diseases of hair and hair follicles	dermatologic	0.666183	0.191596	1.94679	1.3373	2.83406	0.00050702	27560	2020	25540	FALSE
submucosal	939	Atopic/contact dermatitis due to other or unspecified	dermatologic	0.291129	0.0838602	1.33794	1.13515	1.57695	0.00051738	27470	2020	25450	FALSE
submucosal	695	Erythematous conditions	dermatologic	0.332692	0.0965662	1.39472	1.15422	1.68533	0.00057058	27243	2003	25240	FALSE
submucosal	288.1	Decreased white blood cell count	hematopoietic	0.422872	0.122981	1.52634	1.19941	1.94238	0.00058489	26454	1948	24506	FALSE
submucosal	475	Chronic sinusitis	respiratory	0.310248	0.0904317	1.36376	1.14225	1.62823	0.00060193	22864	1615	21249	FALSE
submucosal	614.51	Cervicitis and endocervicitis	genitourinary	0.628595	0.184565	1.87497	1.30584	2.69216	0.00065966	21781	1359	20422	FALSE
submucosal	454	Varicose veins	circulatory system	0.500936	0.147983	1.65027	1.23478	2.20556	0.00071153	26027	1925	24102	FALSE
submucosal	765	Cervical radiculitis	symptoms	0.391246	0.116106	1.47882	1.17784	1.85672	0.0007524	27555	2072	25483	FALSE
submucosal	1011	Complications of surgical and medical procedures	NULL	0.440332	0.131132	1.55322	1.20119	2.00843	0.00078533	31189	2445	28744	FALSE
submucosal	427	Cardiac dysrhythmias	circulatory system	0.186415	0.0559362	1.20492	1.0798	1.34454	0.00086029	28719	2216	26503	FALSE
submucosal	635.3	Placenta previa and abruptio placenta	pregnancy complications	-1.20245	0.360914	0.300458	0.148104	0.609536	0.00086325	26065	2185	23880	FALSE
submucosal	246.2	Thyroid cyst	endocrine/metabolic	2.36953	0.71256	10.6923	2.64563	43.2131	0.00088301	24917	1844	23073	FALSE
submucosal	244	Hypothyroidism	endocrine/metabolic	0.224954	0.06783	1.25227	1.09637	1.43032	0.0009117	28179	2135	26044	FALSE
submucosal	735.3	Hallux valgus (Bunion)	musculoskeletal	0.481359	0.146127	1.61827	1.21525	2.15495	0.00098735	28199	2134	26065	FALSE
submucosal	327.7	Sleep related movement disorders	neurological	0.441329	0.135384	1.55477	1.19241	2.02725	0.0011148	25550	1866	23684	FALSE
submucosal	184.2	Cancer of other female genital organs (excluding uterus and ovary)	neoplasms	0.779205	0.239249	2.17974	1.3638	3.48383	0.00112645	25770	1906	23864	FALSE
submucosal	722	Intervertebral disc disorders	musculoskeletal	0.259323	0.0800251	1.29605	1.10791	1.51615	0.00119309	27730	2093	25637	FALSE
submucosal	742.9	Other derangement of joint	musculoskeletal	0.479519	0.148071	1.6153	1.2084	2.1592	0.00120182	27209	2004	25205	FALSE
submucosal	782.6	Pallor and flushing	symptoms	0.507369	0.156844	1.66091	1.22135	2.25868	0.00121699	26967	1985	24982	FALSE
submucosal	471	Nasal polyps	respiratory	0.868083	0.269378	2.38234	1.40509	4.03927	0.00127059	21285	1469	19816	FALSE
submucosal	281.12	Other vitamin B12 deficiency anemia	hematopoietic	0.661329	0.205799	1.93737	1.29429	2.89995	0.00131139	21257	1232	20025	FALSE
submucosal	702.2	Seborrheic keratosis	dermatologic	0.303616	0.0948653	1.35475	1.12488	1.63159	0.00137192	29764	2289	27475	FALSE
submucosal	645	Late pregnancy and failed induction	pregnancy complications	-1.44379	0.452947	0.236033	0.0971438	0.573493	0.00143491	30841	2442	28399	FALSE
submucosal	1005	Other symptoms	NULL	2.92217	0.919401	18.5815	3.06529	112.64	0.00148121	31189	2445	28744	FALSE
submucosal	737	Curvature of spine	musculoskeletal	0.489849	0.154705	1.63207	1.20518	2.21018	0.00154373	28159	2127	26032	FALSE
submucosal	175	Acquired absence of breast	neoplasms	0.554422	0.176115	1.74093	1.23274	2.45864	0.00164354	23495	1590	21905	FALSE
submucosal	701.2	Scar conditions and fibrosis of skin	dermatologic	0.434588	0.138487	1.54433	1.17722	2.02592	0.00170039	28188	2091	26097	FALSE
submucosal	771.1	Swelling of limb	symptoms	0.309811	0.0987469	1.36317	1.1233	1.65426	0.00170438	28610	2184	26426	FALSE
submucosal	454.11	Varicose veins of lower extremity, symptomtic	circulatory system	0.556123	0.17728	1.7439	1.23202	2.46845	0.00170697	25871	1908	23963	FALSE
submucosal	352.1	Trigeminal nerve disorders [CN5]	neurological	0.609881	0.194594	1.84021	1.25668	2.6947	0.00172371	27877	2149	25728	FALSE
submucosal	110.11	Dermatophytosis of nail	infectious diseases	0.377169	0.120521	1.45815	1.15136	1.84668	0.00175116	26598	1947	24651	FALSE
submucosal	722.6	Degeneration of intervertebral disc	musculoskeletal	0.27557	0.0882258	1.31728	1.1081	1.56595	0.00178738	27272	2052	25220	FALSE
submucosal	199	Neoplasm of uncertain behavior	neoplasms	0.337782	0.108564	1.40183	1.13314	1.73424	0.00186224	29088	2255	26833	FALSE
submucosal	110.12	Althete's foot	infectious diseases	0.734681	0.236662	2.08482	1.31104	3.31527	0.00190696	25994	1883	24111	FALSE
submucosal	54	Herpes simplex	infectious diseases	0.359841	0.116313	1.4331	1.14096	1.80005	0.00197652	25591	1900	23691	FALSE
submucosal	519	Other diseases of respiratory system, not elsewhere classified	respiratory	0.389977	0.126085	1.47695	1.15356	1.891	0.00198169	29764	2280	27484	FALSE
submucosal	642.1	Preeclampsia and eclampsia	pregnancy complications	-0.626677	0.203927	0.534364	0.358304	0.796937	0.00211887	29789	2377	27412	FALSE
submucosal	695.8	Other specified erythematous conditions	dermatologic	0.566014	0.184489	1.76123	1.22681	2.52846	0.00215492	26217	1905	24312	FALSE
submucosal	367.4	Presbyopia	sense organs	0.380028	0.124314	1.46233	1.14611	1.86579	0.00223569	30590	2369	28221	FALSE
submucosal	379.3	Aphakia and other disorders of lens	sense organs	1.51397	0.495501	4.54472	1.72079	12.0029	0.0022474	27296	2062	25234	FALSE
submucosal	687.2	Localized superficial swelling, mass, or lump	dermatologic	0.434102	0.142475	1.54358	1.16748	2.04082	0.00231249	30597	2394	28203	FALSE
submucosal	695.3	Rosacea	dermatologic	0.472319	0.155512	1.60371	1.18236	2.17521	0.00238801	26412	1919	24493	FALSE
submucosal	374.6	Dermatochalasis	sense organs	0.500164	0.16495	1.64899	1.19347	2.27838	0.00242759	26618	2012	24606	FALSE
submucosal	244.4	Hypothyroidism NOS	endocrine/metabolic	0.21828	0.0720404	1.24393	1.08013	1.43258	0.00244583	27777	2097	25680	FALSE
submucosal	643	Excessive vomiting in pregnancy	pregnancy complications	-0.777033	0.258085	0.459768	0.277238	0.762474	0.00260591	30750	2422	28328	FALSE
submucosal	592.11	Acute cystitis	genitourinary	0.340176	0.113259	1.40519	1.12545	1.75447	0.00266886	23519	1736	21783	FALSE
submucosal	540	Appendiceal conditions	digestive	0.607153	0.202886	1.8352	1.23306	2.73139	0.00276633	31000	2418	28582	FALSE
submucosal	592.1	Cystitis	genitourinary	0.290445	0.0973072	1.33702	1.10486	1.61796	0.00283743	23929	1773	22156	FALSE
submucosal	737.3	Kyphoscoliosis and scoliosis	musculoskeletal	0.496156	0.166437	1.6424	1.18523	2.27589	0.00287264	28100	2120	25980	FALSE
submucosal	592	Cystitis and urethritis	genitourinary	0.285808	0.0960219	1.33084	1.10253	1.60643	0.00291567	23973	1777	22196	FALSE
submucosal	726.3	Bursitis	musculoskeletal	0.49135	0.166073	1.63452	1.18039	2.26337	0.00308996	23362	1619	21743	FALSE
submucosal	728	Disorders of muscle, ligament, and fascia	musculoskeletal	0.783844	0.265716	2.18987	1.30088	3.68639	0.00317848	23108	1592	21516	FALSE
submucosal	686	Other local infections of skin and subcutaneous tissue	dermatologic	0.419083	0.142235	1.52057	1.15062	2.00945	0.00321477	26831	2055	24776	FALSE
submucosal	483	Acute bronchitis and bronchiolitis	respiratory	0.310605	0.105714	1.36425	1.10894	1.67834	0.00330177	26458	1970	24488	FALSE
submucosal	624.9	stress incontinence, female	genitourinary	0.342466	0.117203	1.40842	1.11935	1.77213	0.00347796	28235	2098	26137	FALSE
submucosal	306.1	Mental disorders durring/after pregnancy	mental disorders	-0.711075	0.243798	0.491116	0.30455	0.791971	0.00353809	20582	1395	19187	FALSE
submucosal	738	Other acquired musculoskeletal deformity	musculoskeletal	0.395674	0.135718	1.48538	1.13845	1.93805	0.00355215	28333	2143	26190	FALSE
submucosal	453	Chronic venous hypertension	circulatory system	1.83663	0.633909	6.27536	1.81152	21.7387	0.00376378	25582	1874	23708	FALSE
submucosal	724	Other and unspecified disorders of back	musculoskeletal	0.332759	0.115569	1.39481	1.11209	1.7494	0.00398548	26475	1972	24503	FALSE
submucosal	835	Internal derangement of knee	injuries & poisonings	0.330886	0.115027	1.3922	1.11119	1.74428	0.00402003	29786	2312	27474	FALSE
submucosal	250.4	Abnormal glucose	endocrine/metabolic	0.264953	0.0922983	1.30337	1.08768	1.56183	0.00409668	26957	2065	24892	FALSE
submucosal	174	Breast cancer	neoplasms	0.302947	0.105785	1.35384	1.10033	1.66577	0.00418614	25455	1795	23660	FALSE
submucosal	597	Other disorders of urethra and urinary tract	genitourinary	0.61322	0.214542	1.84637	1.21254	2.81151	0.00425949	28838	2226	26612	FALSE
submucosal	647.1	Infections of genitourinary tract during pregnancy	pregnancy complications	-0.672116	0.238772	0.510627	0.319784	0.815362	0.00487946	29840	2369	27471	FALSE
submucosal	253.1	Pituitary hyperfunction	endocrine/metabolic	0.601305	0.213696	1.8245	1.20017	2.77361	0.00489544	27318	2027	25291	FALSE
submucosal	470	Septal Deviations/Turbinate Hypertrophy	respiratory	0.307135	0.109224	1.35952	1.09752	1.68407	0.00492396	22279	1557	20722	FALSE
submucosal	681.1	Cellulitis and abscess of fingers/toes	dermatologic	0.480668	0.17193	1.61715	1.15452	2.26517	0.00517837	26673	2036	24637	FALSE
submucosal	173	Neoplasm of uncertain behavior of skin	neoplasms	0.280366	0.10041	1.32361	1.08715	1.61151	0.00523471	29406	2276	27130	FALSE
submucosal	284	Aplastic anemia	hematopoietic	0.547002	0.196451	1.72806	1.17581	2.5397	0.00536232	21313	1234	20079	FALSE
submucosal	174.1	Breast cancer [female]	neoplasms	0.300478	0.108436	1.3505	1.09193	1.67032	0.00558817	25395	1789	23606	FALSE
submucosal	562.1	Diverticulosis	digestive	0.270527	0.0977434	1.31066	1.08215	1.58741	0.00564479	24004	1786	22218	FALSE
submucosal	698	Pruritus and related conditions	dermatologic	0.316141	0.114784	1.37182	1.09545	1.71792	0.00588293	29844	2302	27542	FALSE
submucosal	184	Cancer of other female genital organs	neoplasms	0.39676	0.145236	1.487	1.11862	1.97669	0.00629828	26175	1941	24234	FALSE
submucosal	578	Gastrointestinal hemorrhage	digestive	0.243494	0.0895929	1.2757	1.07025	1.52059	0.00657218	26540	1940	24600	FALSE
submucosal	278.11	Morbid obesity	endocrine/metabolic	0.181168	0.0671356	1.19862	1.05083	1.36719	0.00696443	25642	1931	23711	FALSE
submucosal	939.1	Contact and allergic dermatitis of eyelid	dermatologic	1.64254	0.608894	5.16829	1.56692	17.047	0.0069845	25664	1840	23824	FALSE
submucosal	327.41	Organic or persistent insomnia	neurological	0.452533	0.167991	1.57229	1.13119	2.18539	0.0070643	25323	1842	23481	FALSE
submucosal	374	Other disorders of eyelids	sense organs	0.3452	0.128229	1.41227	1.09842	1.81581	0.00710137	26939	2042	24897	FALSE
submucosal	722.1	Displacement of intervertebral disc	musculoskeletal	0.380277	0.141317	1.46269	1.10882	1.92949	0.00712492	26157	1941	24216	FALSE
submucosal	240	Simple and unspecified goiter	endocrine/metabolic	0.444957	0.165896	1.56042	1.12727	2.16001	0.00731534	25240	1884	23356	FALSE
submucosal	727.4	Ganglion and cyst of synovium, tendon, and bursa	musculoskeletal	0.431143	0.160813	1.53902	1.12294	2.10926	0.0073396	23420	1621	21799	FALSE
submucosal	289.4	Lymphadenitis	hematopoietic	0.262519	0.0983346	1.3002	1.07228	1.57658	0.00759302	27026	1995	25031	FALSE
submucosal	735.21	Hammer toe (acquired)	musculoskeletal	0.448908	0.168571	1.5666	1.12582	2.17996	0.00774414	28085	2120	25965	FALSE
submucosal	573.3	Hepatomegaly	digestive	0.557002	0.209238	1.74543	1.15823	2.63033	0.00776681	26699	2039	24660	FALSE
submucosal	386.2	Peripheral or central vertigo	sense organs	0.391654	0.147748	1.47943	1.10746	1.97633	0.00802935	26295	1928	24367	FALSE
submucosal	502	Postinflammatory pulmonary fibrosis	respiratory	0.618413	0.234433	1.85598	1.17225	2.93851	0.00834192	27346	2094	25252	FALSE
submucosal	783.1	Postprocedural fever	symptoms	0.975631	0.372158	2.65284	1.27916	5.50171	0.00875301	25951	1933	24018	FALSE
submucosal	690.1	Seborrheic dermatitis	dermatologic	0.419867	0.160365	1.52176	1.11132	2.08378	0.00883948	26347	1916	24431	FALSE
submucosal	687	Symptoms affecting skin	dermatologic	0.320997	0.123036	1.3785	1.08312	1.75444	0.00908179	24730	1784	22946	FALSE
submucosal	211	Benign neoplasm of other parts of digestive system	neoplasms	0.484056	0.185758	1.62264	1.12746	2.3353	0.00916499	30008	2321	27687	FALSE
submucosal	367.1	Myopia	sense organs	0.256502	0.0984545	1.2924	1.06559	1.56749	0.00917976	29194	2222	26972	FALSE
submucosal	568	Other disorders of peritoneum	digestive	0.409767	0.15764	1.50647	1.10605	2.05185	0.00933907	26551	1954	24597	FALSE
submucosal	561	Symptoms involving digestive system	digestive	0.201715	0.0780942	1.2235	1.04985	1.42587	0.00979541	24921	1857	23064	FALSE
submucosal	840	Sprains and strains	injuries & poisonings	0.211315	0.0822582	1.2353	1.05136	1.45142	0.0102014	28201	2133	26068	FALSE
submucosal	562.2	Diverticulitis	digestive	0.42173	0.164745	1.5246	1.10388	2.10566	0.0104705	22963	1684	21279	FALSE
submucosal	228.1	Hemangioma of skin and subcutaneous tissue	neoplasms	0.393307	0.153673	1.48187	1.09648	2.00272	0.010486	30123	2354	27769	FALSE
submucosal	386	Vertiginous syndromes and other disorders of vestibular system	sense organs	0.327972	0.128705	1.38815	1.07865	1.78645	0.0108263	26501	1946	24555	FALSE
submucosal	172.21	Basal cell carcinoma	neoplasms	0.436574	0.171377	1.5474	1.10592	2.16512	0.0108516	28478	2191	26287	FALSE
submucosal	452	Other venous embolism and thrombosis	circulatory system	0.286769	0.112878	1.33212	1.06772	1.66198	0.0110685	26477	1965	24512	FALSE
submucosal	10	Tuberculosis	infectious diseases	1.22981	0.484442	3.42058	1.32353	8.84027	0.0111292	26658	2013	24645	FALSE
submucosal	690	Erythematosquamous dermatosis	dermatologic	0.406217	0.160248	1.50113	1.09651	2.05505	0.011247	26352	1916	24436	FALSE
submucosal	614.54	Abscess or ulceration of vulva	genitourinary	0.743317	0.29337	2.1029	1.18331	3.73715	0.011286	21611	1337	20274	FALSE
submucosal	610.3	Fibrosclerosis of breast	genitourinary	0.663088	0.262024	1.94078	1.16128	3.24351	0.0113856	23905	1595	22310	FALSE
submucosal	277.7	Dysmetabolic syndrome X	endocrine/metabolic	0.495875	0.196	1.64193	1.11819	2.41098	0.011407	30298	2356	27942	FALSE
submucosal	674	Other complications of the puerperium NEC	pregnancy complications	-1.79547	0.713637	0.166049	0.0409993	0.672508	0.0118714	30310	2409	27901	FALSE
submucosal	612.3	Congenital anomalies of breast	genitourinary	1.29707	0.517184	3.65857	1.32762	10.082	0.0121434	23786	1583	22203	FALSE
submucosal	365.5	Pseudoexfoliation glaucoma	sense organs	2.51808	1.00412	12.4048	1.73326	88.7794	0.0121502	28757	2214	26543	FALSE
submucosal	636.1	Threatened premature labor	pregnancy complications	-0.513269	0.20645	0.598536	0.399352	0.897065	0.0129128	26203	2203	24000	FALSE
submucosal	395.3	Nonrheumatic tricuspid valve disorders	circulatory system	0.596565	0.239974	1.81587	1.13453	2.9064	0.0129204	28975	2232	26743	FALSE
submucosal	741.5	Hemarthrosis	musculoskeletal	1.46589	0.589946	4.33138	1.36287	13.7657	0.0129631	26781	1953	24828	FALSE
submucosal	519.9	Symptoms involving respiratory system and other chest symptoms	respiratory	0.371158	0.149462	1.44941	1.08135	1.94275	0.0130171	29583	2257	27326	FALSE
submucosal	474.2	Chronic tonsillitis and adenoiditis	respiratory	0.492405	0.198342	1.63625	1.10922	2.41369	0.0130428	21437	1482	19955	FALSE
submucosal	612.1	Galactorrhea	genitourinary	0.67722	0.272901	1.9684	1.15296	3.36056	0.0130809	23881	1594	22287	FALSE
submucosal	251.1	Hypoglycemia	endocrine/metabolic	0.485728	0.19577	1.62536	1.1074	2.38557	0.0130971	23411	1681	21730	FALSE
submucosal	174.11	Malignant neoplasm of female breast	neoplasms	0.279795	0.112865	1.32286	1.06033	1.65039	0.0131743	25319	1780	23539	FALSE
submucosal	703.1	Ingrowing nail	dermatologic	0.4925	0.199012	1.6364	1.10787	2.41709	0.0133341	27569	2017	25552	FALSE
submucosal	555	Inflammatory bowel disease and other gastroenteritis and colitis	digestive	0.390867	0.158046	1.47826	1.08448	2.01504	0.0133937	23013	1686	21327	FALSE
submucosal	325	Phlebitis and thrombophlebitis of intracranial venous sinuses	neurological	1.14157	0.462454	3.13169	1.26511	7.75223	0.0135677	30898	2429	28469	FALSE
submucosal	727.1	Synovitis and tenosynovitis	musculoskeletal	0.26358	0.106853	1.30158	1.05564	1.60482	0.0136348	24124	1687	22437	FALSE
submucosal	217.1	Nevus, non-neoplastic	neoplasms	0.521109	0.211383	1.68389	1.11271	2.54828	0.0136921	27345	2049	25296	FALSE
submucosal	415.1	Acute pulmonary heart disease	circulatory system	0.358519	0.145464	1.43121	1.07617	1.90338	0.0137147	29493	2284	27209	FALSE
submucosal	425.8	Other cardiomyopathy	circulatory system	0.987159	0.40059	2.6836	1.22385	5.88446	0.0137296	30081	2347	27734	FALSE
submucosal	352	Disorders of other cranial nerves	neurological	0.404285	0.164186	1.49823	1.08598	2.06698	0.0138027	28020	2161	25859	FALSE
submucosal	295.2	Paranoid disorders	mental disorders	0.721374	0.294774	2.05726	1.15444	3.66611	0.0143966	20174	1391	18783	FALSE
submucosal	528.1	Stomatitis and mucositis	digestive	-1.2397	0.507681	0.28947	0.107018	0.78298	0.0146105	29552	2288	27264	FALSE
submucosal	474	Acute and chronic tonsillitis	respiratory	0.42487	0.174215	1.52939	1.08699	2.15186	0.0147372	21532	1491	20041	FALSE
submucosal	450	Noninfectious disorders of lymphatic channels	circulatory system	0.354157	0.145576	1.42498	1.07125	1.8955	0.0149825	30934	2424	28510	FALSE
submucosal	172	Skin cancer	neoplasms	0.308378	0.128494	1.36122	1.05816	1.75107	0.0163972	28879	2224	26655	FALSE
submucosal	707.1	Decubitus ulcer	dermatologic	-0.818576	0.342517	0.441059	0.225393	0.863085	0.0168537	30768	2402	28366	FALSE
submucosal	738.4	Acquired spondylolisthesis	musculoskeletal	0.362882	0.152475	1.43747	1.06613	1.93815	0.017315	28209	2129	26080	FALSE
submucosal	571	Chronic liver disease and cirrhosis	digestive	0.214015	0.0900164	1.23864	1.0383	1.47764	0.01743	28086	2163	25923	FALSE
submucosal	217	Vascular hamartomas and non-neoplastic nevi	neoplasms	0.481064	0.20337	1.61779	1.08595	2.4101	0.0180075	27373	2051	25322	FALSE
submucosal	565	Anal and rectal conditions	digestive	0.27683	0.117089	1.31894	1.04847	1.65918	0.0180658	26986	1994	24992	FALSE
submucosal	289.5	Diseases of spleen	hematopoietic	0.713883	0.302402	2.0419	1.12882	3.69356	0.0182403	25864	1881	23983	FALSE
submucosal	394.7	Disease of tricuspid valve	circulatory system	0.471629	0.200227	1.6026	1.0824	2.37281	0.0184995	29054	2241	26813	FALSE
submucosal	501	Pneumonitis due to inhalation of food or vomitus	respiratory	-1.68073	0.714619	0.186238	0.0458957	0.755726	0.0186766	27311	2074	25237	FALSE
submucosal	789.1	Persistent vomiting	symptoms	1.20345	0.51357	3.33158	1.21756	9.11612	0.0191142	23677	1722	21955	FALSE
submucosal	250.11	Type 1 diabetes with ketoacidosis	endocrine/metabolic	0.83399	0.356144	2.30249	1.14562	4.62757	0.0191949	25612	1925	23687	FALSE
submucosal	475.9	Postnasal drip	respiratory	0.400923	0.171598	1.4932	1.06672	2.09019	0.0194699	21564	1492	20072	FALSE
submucosal	656	Other perinatal conditions of fetus or newborn	pregnancy complications	-1.17651	0.506627	0.308352	0.114234	0.832331	0.0202195	30947	2438	28509	FALSE
submucosal	287.31	Primary thrombocytopenia	hematopoietic	0.768216	0.331543	2.15592	1.12569	4.12902	0.0204986	28281	2160	26121	FALSE
submucosal	568.1	Peritoneal adhesions (postoperative) (postinfection)	digestive	0.501532	0.21659	1.65125	1.08006	2.52451	0.0205814	26329	1932	24397	FALSE
submucosal	850	Hemorrhage or hematoma complicating a procedure	injuries & poisonings	0.475163	0.205259	1.60828	1.07558	2.40481	0.020616	29668	2299	27369	FALSE
submucosal	172.2	Other non-epithelial cancer of skin	neoplasms	0.320634	0.139908	1.378	1.04751	1.81276	0.02192	28739	2212	26527	FALSE
submucosal	478	Throat pain	respiratory	0.419851	0.18328	1.52173	1.0625	2.17947	0.0219775	21506	1487	20019	FALSE
submucosal	193	Thyroid cancer	neoplasms	0.466564	0.203839	1.59451	1.06934	2.37759	0.0220861	30578	2377	28201	FALSE
submucosal	250.41	Impaired fasting glucose	endocrine/metabolic	0.308933	0.135167	1.36197	1.04499	1.77511	0.0222798	26147	1981	24166	FALSE
submucosal	242.2	Toxic multinodular goiter	endocrine/metabolic	0.702018	0.307208	2.01782	1.10505	3.68454	0.0223036	24988	1853	23135	FALSE
submucosal	772.3	Muscle weakness	symptoms	0.201069	0.0882741	1.22271	1.02845	1.45366	0.0227395	28165	2147	26018	FALSE
submucosal	252	Disorders of parathyroid gland	endocrine/metabolic	0.346577	0.153112	1.41422	1.04757	1.90918	0.0236015	27570	2052	25518	FALSE
submucosal	284.1	Pancytopenia	hematopoietic	0.484221	0.214071	1.62291	1.06678	2.46897	0.0236997	21278	1229	20049	FALSE
submucosal	258	Iatrogenic endocrine disorders	endocrine/metabolic	1.54223	0.683349	4.67499	1.2249	17.8426	0.0240165	27140	2004	25136	FALSE
submucosal	300.4	Dysthymic disorder	mental disorders	0.434139	0.19251	1.54363	1.05847	2.25119	0.0241235	20373	1409	18964	FALSE
submucosal	480	Pneumonia	respiratory	0.217475	0.0966469	1.24293	1.02844	1.50216	0.0244362	26732	1992	24740	FALSE
submucosal	228	Hemangioma and lymphangioma, any site	neoplasms	0.300331	0.13365	1.35031	1.03912	1.75468	0.0246311	30309	2370	27939	FALSE
submucosal	375.1	Dry eyes	sense organs	0.221052	0.0985823	1.24739	1.02822	1.51327	0.0249417	28612	2187	26425	FALSE
submucosal	855	Complication of nervous system device, implant, and graft	injuries & poisonings	1.03029	0.460339	2.80188	1.13658	6.90714	0.0252138	29481	2277	27204	FALSE
submucosal	671	Venous/cerebrovascular complications embolism in pregnancy and the puerperium	pregnancy complications	-0.932398	0.417208	0.393609	0.173752	0.89166	0.0254272	30351	2413	27938	FALSE
submucosal	415.11	Pulmonary embolism and infarction, acute	circulatory system	0.332515	0.149076	1.39447	1.04115	1.86769	0.025714	29480	2281	27199	FALSE
submucosal	994.21	Septic shock	injuries & poisonings	-0.724786	0.325021	0.484428	0.256192	0.915994	0.0257496	30128	2347	27781	FALSE
submucosal	512.2	Painful respiration	respiratory	0.325935	0.146257	1.38533	1.04005	1.84522	0.025847	19932	1363	18569	FALSE
submucosal	79	Viral infection	infectious diseases	0.256292	0.115299	1.29213	1.03077	1.61976	0.0262263	25662	1902	23760	FALSE
submucosal	571.5	Other chronic nonalcoholic liver disease	digestive	0.204893	0.0922521	1.22739	1.02437	1.47065	0.0263501	28012	2155	25857	FALSE
submucosal	379	Other disorders of eye	sense organs	0.238328	0.107697	1.26912	1.02762	1.56739	0.0269014	28342	2165	26177	FALSE
submucosal	427.7	Tachycardia NOS	circulatory system	0.195151	0.0882438	1.21549	1.02244	1.445	0.0270011	25111	1880	23231	FALSE
submucosal	165	Cancer within the respiratory system	neoplasms	0.508238	0.230682	1.66236	1.0577	2.61268	0.0275809	31076	2431	28645	FALSE
submucosal	931	Contact dermatitis and other eczema due to plants [except food]	dermatologic	0.658365	0.299077	1.93163	1.07484	3.47139	0.0277131	25756	1849	23907	FALSE
submucosal	376	Disorders of the orbit	sense organs	1.25718	0.571268	3.51548	1.14739	10.771	0.0277587	27294	2060	25234	FALSE
submucosal	286.5	Hemorrhagic disorder due to intrinsic circulating anticoagulants	hematopoietic	0.770376	0.350754	2.16058	1.08643	4.29673	0.0280676	28270	2159	26111	FALSE
submucosal	340.1	Migrain with aura	neurological	0.301659	0.137484	1.3521	1.03271	1.77026	0.0282254	26613	1976	24637	FALSE
submucosal	269	Proteinuria	endocrine/metabolic	0.303131	0.13822	1.35409	1.03274	1.77543	0.0283001	30423	2370	28053	FALSE
submucosal	281.9	Deficiency anemias	hematopoietic	0.589118	0.269325	1.8024	1.06315	3.05566	0.0287145	21163	1220	19943	FALSE
submucosal	242.1	Graves' disease	endocrine/metabolic	0.419656	0.192027	1.52144	1.04423	2.21672	0.0288593	25165	1872	23293	FALSE
submucosal	286	Coagulation defects	hematopoietic	0.25215	0.115461	1.28679	1.02618	1.61358	0.0289737	29076	2237	26839	FALSE
submucosal	700	Corns and callosities	dermatologic	0.460101	0.210768	1.58423	1.04812	2.39458	0.0290374	27840	2056	25784	FALSE
submucosal	473.4	Voice disturbance	respiratory	0.314897	0.144274	1.37012	1.03264	1.81789	0.0290632	21759	1510	20249	FALSE
submucosal	643.1	Hyperemesis gravidarum	pregnancy complications	-1.11359	0.510311	0.328378	0.120778	0.892811	0.0290963	30497	2410	28087	FALSE
submucosal	599.5	Frequency of urination and polyuria	genitourinary	0.441683	0.202642	1.55532	1.04551	2.31373	0.0292852	22654	1600	21054	FALSE
submucosal	244.2	Acquired hypothyroidism	endocrine/metabolic	0.306537	0.140786	1.35871	1.03107	1.79047	0.0294562	25509	1899	23610	FALSE
submucosal	481	Influenza	respiratory	0.331918	0.152633	1.39364	1.0333	1.87964	0.0296586	25853	1909	23944	FALSE
submucosal	561.1	Diarrhea	digestive	0.196302	0.0903983	1.21689	1.01931	1.45279	0.0298917	29655	2322	27333	FALSE
submucosal	285.22	Anemia in neoplastic disease	hematopoietic	0.361666	0.166867	1.43572	1.03521	1.99118	0.0302054	21495	1246	20249	FALSE
submucosal	647	Infectious and parasitic complications affecting pregnancy	pregnancy complications	-0.470637	0.217876	0.624604	0.407516	0.957338	0.0307643	29866	2373	27493	FALSE
submucosal	153.2	Colon cancer	neoplasms	0.461331	0.215382	1.58618	1.03996	2.41931	0.0322005	27343	1994	25349	FALSE
submucosal	703	Diseases of nail, NOS	dermatologic	0.392842	0.183423	1.48118	1.03389	2.12198	0.0322156	27638	2022	25616	FALSE
submucosal	293.1	Swelling, mass, or lump in head and neck [Space-occupying lesion, intracranial NOS]	mental disorders	0.280125	0.13105	1.32329	1.02354	1.71084	0.0325535	30062	2325	27737	FALSE
submucosal	527.1	Hypertrophy of salivary gland	digestive	1.4867	0.698385	4.42248	1.12509	17.3838	0.0332734	29404	2287	27117	FALSE
submucosal	704.11	Alopecia Areata	dermatologic	0.704345	0.331414	2.02252	1.0563	3.87256	0.0335637	27403	1998	25405	FALSE
submucosal	366.2	Senile cataract	sense organs	0.181594	0.0854608	1.19913	1.01419	1.41779	0.0335968	30337	2362	27975	FALSE
submucosal	555.2	Ulcerative colitis	digestive	0.433344	0.204028	1.54241	1.03401	2.30076	0.0336754	22825	1667	21158	FALSE
submucosal	465.4	Acute laryngitis and tracheitis	respiratory	0.66552	0.314716	1.9455	1.04988	3.60515	0.0344584	19378	1308	18070	FALSE
submucosal	459.1	Hemorrhage NOS	circulatory system	0.615481	0.29154	1.85055	1.04505	3.27691	0.0347605	28646	2237	26409	FALSE
submucosal	735.23	Hallux rigidus	musculoskeletal	0.634052	0.301035	1.88523	1.04501	3.40104	0.0351837	27851	2090	25761	FALSE
submucosal	250	Diabetes mellitus	endocrine/metabolic	0.139903	0.0667872	1.15016	1.00904	1.31102	0.0361924	28792	2231	26561	FALSE
submucosal	158	Neoplasm of unspecified nature of digestive system	neoplasms	0.518355	0.247854	1.67926	1.0331	2.72958	0.0364944	29671	2287	27384	FALSE
submucosal	327.5	Parasomnia	neurological	0.660856	0.316059	1.93645	1.04225	3.59783	0.0365344	25040	1812	23228	FALSE
submucosal	300.9	Posttraumatic stress disorder	mental disorders	0.300826	0.144183	1.35097	1.01839	1.79217	0.0369412	20661	1434	19227	FALSE
submucosal	726.4	Calcaneal spur; Exostosis NOS	musculoskeletal	0.452501	0.217363	1.57224	1.02682	2.40737	0.0373631	23208	1600	21608	FALSE
submucosal	614.53	Cyst or abscess of Bartholin's gland	genitourinary	0.624207	0.30047	1.86676	1.03591	3.36399	0.0377618	21616	1336	20280	FALSE
submucosal	442.4	Arterial dissection	circulatory system	0.812357	0.391113	2.25321	1.04684	4.8498	0.0377981	28726	2218	26508	FALSE
submucosal	650	Normal delivery	pregnancy complications	-0.946313	0.456203	0.38817	0.158743	0.949183	0.0380494	30965	2441	28524	FALSE
submucosal	599.2	Retention of urine	genitourinary	0.332778	0.161221	1.39484	1.01693	1.91319	0.0390071	22873	1616	21257	FALSE
submucosal	253	Disorders of the pituitary gland and its hypothalamic control	endocrine/metabolic	0.374856	0.181888	1.45478	1.01852	2.0779	0.0393111	27441	2036	25405	FALSE
submucosal	701.6	Acquired acanthosis nigricans	dermatologic	0.552568	0.26828	1.73771	1.0271	2.93996	0.0394299	27739	2046	25693	FALSE
submucosal	569	Other disorders of intestine	digestive	0.199045	0.0967028	1.22024	1.00955	1.47489	0.0395601	27476	2037	25439	FALSE
submucosal	276.13	Hyperpotassemia	endocrine/metabolic	0.23815	0.116025	1.2689	1.0108	1.5929	0.0401133	25998	1970	24028	FALSE
submucosal	624	Symptoms involving female genital tract	genitourinary	0.673317	0.328116	1.96073	1.03067	3.73006	0.0401627	27443	2022	25421	FALSE
submucosal	252.1	Hyperparathyroidism	endocrine/metabolic	0.330075	0.160938	1.39107	1.01474	1.90697	0.0402723	27530	2047	25483	FALSE
submucosal	578.2	Blood in stool	digestive	0.253397	0.123628	1.28839	1.01115	1.64166	0.0403961	25723	1862	23861	FALSE
submucosal	519.8	Other diseases of respiratory system, NEC	respiratory	0.620361	0.302932	1.8596	1.02697	3.36729	0.040574	29217	2217	27000	FALSE
submucosal	561.2	Flatulence	digestive	0.292558	0.143763	1.33985	1.01084	1.77595	0.041851	30578	2380	28198	FALSE
submucosal	705	Disorders of sweat glands	dermatologic	0.405148	0.199102	1.49952	1.01502	2.2153	0.0418628	27277	2003	25274	FALSE
submucosal	652	Malposition and malpresentation of fetus or obstruction	pregnancy complications	-2.04166	1.00516	0.129814	0.0181014	0.930955	0.042237	30887	2438	28449	FALSE
submucosal	415	Pulmonary heart disease	circulatory system	0.257909	0.127637	1.29422	1.00777	1.66209	0.0433166	29689	2301	27388	FALSE
submucosal	651	Multiple gestation	pregnancy complications	-0.921532	0.456437	0.397909	0.162651	0.973443	0.0434903	31168	2443	28725	FALSE
submucosal	705.8	Hyperhidrosis	dermatologic	0.4351	0.215575	1.54512	1.01265	2.35756	0.0435576	27256	1998	25258	FALSE
submucosal	368	Visual disturbances	sense organs	0.208235	0.103296	1.2315	1.00579	1.50786	0.0438094	29865	2319	27546	FALSE
submucosal	272.14	Hyperchylomicronemia	endocrine/metabolic	1.69113	0.840875	5.42561	1.04395	28.1979	0.0443089	23876	1724	22152	FALSE
submucosal	165.1	Cancer of bronchus; lung	neoplasms	0.473273	0.235509	1.60524	1.01174	2.54689	0.0444763	31073	2430	28643	FALSE
submucosal	801	Fracture of ankle and foot	injuries & poisonings	0.240498	0.120171	1.27188	1.00498	1.60968	0.0453593	29034	2268	26766	FALSE
submucosal	741.4	Joint effusions	musculoskeletal	0.230611	0.115452	1.25937	1.00434	1.57916	0.045774	27658	2041	25617	FALSE
submucosal	740.9	Osteoarthrosis NOS	musculoskeletal	0.185566	0.0935746	1.2039	1.00216	1.44625	0.0473589	26680	1991	24689	FALSE
submucosal	112.3	Candidiasis of skin and nails	infectious diseases	0.535313	0.270233	1.70798	1.00567	2.90075	0.047599	25988	1877	24111	FALSE
submucosal	227	Benign neoplasm of other endocrine glands and related structures	neoplasms	0.379337	0.191534	1.46132	1.00394	2.12707	0.0476446	30604	2381	28223	FALSE
submucosal	540.11	Acute appendicitis	digestive	0.556248	0.280903	1.74412	1.00569	3.02472	0.0476796	30903	2404	28499	FALSE
submucosal	281.13	Folate-deficiency anemia	hematopoietic	1.28461	0.648793	3.61325	1.01306	12.8873	0.0477038	21038	1207	19831	FALSE
submucosal	8	Intestinal infection	infectious diseases	0.306382	0.154756	1.3585	1.00306	1.83989	0.0477289	30539	2382	28157	FALSE
submucosal	456	Chronic venous insufficiency [CVI]	circulatory system	0.357144	0.181094	1.42924	1.0022	2.03824	0.0485929	25896	1906	23990	FALSE
submucosal	705.3	Hidradenitis	dermatologic	0.480895	0.244947	1.61752	1.0008	2.61429	0.0496162	27185	1993	25192	FALSE
submucosal	714	Rheumatoid arthritis and other inflammatory polyarthropathies	musculoskeletal	0.27049	0.13781	1.31061	1.00038	1.71703	0.0496718	28908	2223	26685	FALSE
submucosal	366	Cataract	sense organs	0.163256	0.0832572	1.17734	1.00007	1.38602	0.0498954	30487	2374	28113	FALSE
submucosal	495.1	Chronic obstructive asthma	respiratory	0.627456	0.320533	1.87284	0.999212	3.51029	0.050284	25702	1902	23800	FALSE
submucosal	389	Hearing loss	sense organs	0.170947	0.0873589	1.18643	0.999724	1.408	0.0503668	30153	2348	27805	FALSE
submucosal	389.1	Sensorineural hearing loss	sense organs	0.219258	0.112182	1.24515	0.999381	1.55137	0.0506443	29364	2279	27085	FALSE
submucosal	578.1	Hematemesis	digestive	-1.14278	0.585942	0.318932	0.101143	1.00568	0.0511373	25056	1787	23269	FALSE
submucosal	624.1	Dystrophy of female genital tract	genitourinary	0.753642	0.387056	2.12472	0.995025	4.53702	0.0515211	27417	2019	25398	FALSE
submucosal	227.3	Benign neoplasm of pituitary gland and craniopharyngeal duct (pouch)	neoplasms	0.496288	0.255738	1.64261	0.995053	2.71159	0.0523057	30477	2367	28110	FALSE
submucosal	795	Other and nonspecific abnormal cytological, histological and immunological findings	symptoms	0.367982	0.190502	1.44482	0.994612	2.0988	0.0534037	30802	2412	28390	FALSE
submucosal	702.1	Actinic keratosis	dermatologic	0.269868	0.139821	1.30979	0.995828	1.72274	0.0535942	28900	2206	26694	FALSE
submucosal	560	Intestinal obstruction without mention of hernia	digestive	0.273725	0.141986	1.31485	0.995443	1.73675	0.0538757	23155	1698	21457	FALSE
submucosal	401.21	Hypertensive heart disease	circulatory system	0.225874	0.117316	1.25342	0.995943	1.57745	0.0541858	21903	1564	20339	FALSE
submucosal	701.3	Circumscribed scleroderma	dermatologic	0.500642	0.260311	1.64978	0.990477	2.74794	0.0544497	27785	2046	25739	FALSE
submucosal	514	Abnormal findings examination of lungs	respiratory	0.333113	0.173605	1.3953	0.992872	1.96085	0.0550107	29717	2306	27411	FALSE
submucosal	506	Empyema and pneumothorax	respiratory	0.383585	0.200258	1.46754	0.99112	2.17296	0.0554343	27454	2101	25353	FALSE
submucosal	370.1	Corneal ulcer	sense organs	0.743312	0.38937	2.10289	0.980342	4.51081	0.0562607	26294	1975	24319	FALSE
submucosal	555.21	Ulcerative colitis (chronic)	digestive	0.548011	0.287812	1.72981	0.984029	3.0408	0.0569023	22693	1653	21040	FALSE
submucosal	300.8	Acute reaction to stress	mental disorders	0.509731	0.269834	1.66484	0.981039	2.82527	0.0588843	20218	1393	18825	FALSE
submucosal	560.1	Paralytic ileus	digestive	0.393095	0.208194	1.48156	0.985147	2.22811	0.0590096	22815	1666	21149	FALSE
submucosal	592.12	Chronic cystitis	genitourinary	0.778763	0.414406	2.17877	0.967081	4.90865	0.0602135	22646	1647	20999	FALSE
submucosal	250.2	Type 2 diabetes	endocrine/metabolic	0.127951	0.0681026	1.1365	0.994485	1.29879	0.0602725	28677	2217	26460	FALSE
submucosal	225.2	Benign neoplasm of spinal cord, meninges	neoplasms	1.52246	0.81936	4.5835	0.919908	22.8376	0.0631528	30654	2396	28258	FALSE
submucosal	766	Neuralgia, neuritis, and radiculitis NOS	symptoms	0.241426	0.130121	1.27306	0.986481	1.6429	0.0635402	27448	2052	25396	FALSE
submucosal	427.4	Cardiac arrest and ventricular fibrillation	circulatory system	-1.32667	0.716844	0.265358	0.0651092	1.08149	0.0642106	23544	1721	21823	FALSE
submucosal	585.33	Chronic Kidney Disease, Stage III	genitourinary	-0.363774	0.197553	0.695048	0.471905	1.02371	0.0655636	27139	2072	25067	FALSE
submucosal	411.1	Unstable angina (intermediate coronary syndrome)	circulatory system	-0.531159	0.288505	0.587923	0.333995	1.03491	0.0656107	28420	2169	26251	FALSE
submucosal	282.8	Other hemoglobinopathies	hematopoietic	0.547584	0.2977	1.72907	0.964729	3.09899	0.065859	21142	1217	19925	FALSE
submucosal	276	Disorders of fluid, electrolyte, and acid-base balance	endocrine/metabolic	0.115319	0.0628811	1.12223	0.992104	1.26943	0.0666653	29020	2244	26776	FALSE
submucosal	195	Cancer, suspected or other	neoplasms	0.248133	0.135408	1.28163	0.982881	1.67119	0.0668794	28804	2216	26588	FALSE
submucosal	365	Glaucoma	sense organs	0.201731	0.11033	1.22352	0.985589	1.51889	0.0674852	29703	2314	27389	FALSE
submucosal	620	Dysplasia of female genital organs	genitourinary	0.691626	0.378413	1.99696	0.951168	4.19258	0.0675947	23950	1366	22584	FALSE
submucosal	209	Neuroendocrine tumors	neoplasms	0.596484	0.326854	1.81572	0.956811	3.44567	0.068012	31169	2443	28726	FALSE
submucosal	286.3	Coagulation defects complicating pregnancy or postpartum	hematopoietic	-0.705575	0.387551	0.493825	0.231038	1.05551	0.0686676	28385	2156	26229	FALSE
submucosal	569.1	Toxic gastroenteritis and colitis	digestive	0.699576	0.384345	2.0129	0.947677	4.27546	0.0687325	26184	1915	24269	FALSE
submucosal	781	Symptoms involving nervous and musculoskeletal systems	symptoms	0.441203	0.242745	1.55458	0.966015	2.50173	0.0691311	30772	2400	28372	FALSE
submucosal	535	Gastritis and duodenitis	digestive	0.217602	0.119841	1.24309	0.982863	1.57222	0.0694064	28764	2203	26561	FALSE
submucosal	510	Other diseases of lung	respiratory	0.227843	0.12554	1.25589	0.98195	1.60625	0.0695385	30276	2358	27918	FALSE
submucosal	259.8	Polyglandular activity in multiple endocrine adenomatosis	endocrine/metabolic	1.17619	0.648773	3.24199	0.909002	11.5627	0.0698408	27144	2004	25140	FALSE
submucosal	276.1	Electrolyte imbalance	endocrine/metabolic	0.129589	0.0716681	1.13836	0.989178	1.31004	0.0705785	27993	2148	25845	FALSE
submucosal	296.1	Bipolar	mental disorders	0.238009	0.131761	1.26872	0.979962	1.64257	0.07086	20820	1446	19374	FALSE
submucosal	90	Sexually transmitted infections (not HIV or hepatitis)	infectious diseases	0.395973	0.2201	1.48583	0.965197	2.28729	0.0720093	31003	2427	28576	FALSE
submucosal	733.9	Chondromalacia	musculoskeletal	0.695995	0.388026	2.0057	0.937503	4.29102	0.0728638	25787	1901	23886	FALSE
submucosal	728.2	Laxity of ligament or hypermobility syndrome	musculoskeletal	0.729255	0.408273	2.07354	0.931498	4.61573	0.074068	23047	1582	21465	FALSE
submucosal	145.5	Cancer of the mouth floor	neoplasms	2.53429	1.4263	12.6074	0.770083	206.402	0.0755964	30924	2424	28500	FALSE
submucosal	278.3	Localized adiposity	endocrine/metabolic	0.441102	0.248625	1.55442	0.954848	2.53047	0.0760356	22651	1637	21014	FALSE
submucosal	733	Other disorders of bone and cartilage	musculoskeletal	0.176694	0.0996297	1.19327	0.981591	1.45059	0.0761452	27237	2028	25209	FALSE
submucosal	153	Colorectal cancer	neoplasms	0.346584	0.195941	1.41423	0.963233	2.07638	0.0769235	27418	1999	25419	FALSE
submucosal	714.1	Rheumatoid arthritis	musculoskeletal	0.284685	0.161151	1.32934	0.96931	1.82311	0.0772994	28741	2206	26535	FALSE
submucosal	713.5	Arthropathy associated with neurological disorders	musculoskeletal	0.882419	0.500545	2.41674	0.90606	6.44618	0.0779146	28270	2171	26099	FALSE
submucosal	735.22	Claw toe (acquired)	musculoskeletal	2.48977	1.41505	12.0585	0.752976	193.111	0.0784932	27755	2078	25677	FALSE
submucosal	514.2	Solitary pulmonary nodule	respiratory	0.224924	0.12796	1.25223	0.974454	1.60918	0.078788	30105	2339	27766	FALSE
submucosal	782	Symptoms involving skin and other integumentary tissue	symptoms	0.678682	0.386441	1.97128	0.924278	4.20429	0.0790477	26618	1945	24673	FALSE
submucosal	528	Diseases of the oral soft tissues, excluding lesions specific for gingiva and tongue	digestive	-0.330202	0.18808	0.718778	0.497162	1.03918	0.0791491	29886	2315	27571	FALSE
submucosal	594.3	Calculus of ureter	genitourinary	-0.482502	0.276678	0.617237	0.358872	1.06161	0.0811741	29269	2272	26997	FALSE
submucosal	184.1	Malignant neoplasm of ovary and other uterine adnexa	neoplasms	0.34167	0.195923	1.4073	0.958544	2.06613	0.0811775	25944	1915	24029	FALSE
submucosal	654.2	Rhesus isoimmunization in pregnancy	pregnancy complications	-0.894712	0.514881	0.408725	0.14899	1.12126	0.0822626	24717	2228	22489	FALSE
submucosal	300.12	Agorophobia, social phobia, and panic disorder	mental disorders	0.290024	0.167292	1.33646	0.96284	1.85506	0.0829819	20509	1419	19090	FALSE
submucosal	577.1	Acute pancreatitis	digestive	-0.792809	0.459358	0.452572	0.183939	1.11353	0.0843644	30589	2397	28192	FALSE
submucosal	530.2	Esophageal bleeding (varices/hemorrhage)	digestive	-0.879	0.509589	0.415198	0.152927	1.12727	0.084542	22891	1593	21298	FALSE
submucosal	426.21	First degree AV block	circulatory system	0.779776	0.453188	2.18098	0.897203	5.30168	0.0853153	23493	1725	21768	FALSE
submucosal	441.2	Chronic vascular insufficiency of intestine	circulatory system	0.962844	0.560084	2.61913	0.873785	7.85074	0.085595	28699	2214	26485	FALSE
submucosal	184.11	Malignant neoplasm of ovary	neoplasms	0.354258	0.206272	1.42512	0.951195	2.13518	0.085901	25910	1912	23998	FALSE
submucosal	371.2	Conjunctivitis, noninfectious	sense organs	0.239718	0.141191	1.27089	0.96366	1.67607	0.0895411	26814	2027	24787	FALSE
submucosal	634.1	Missed abortion/Hydatidiform mole	pregnancy complications	-0.274627	0.161952	0.759856	0.553191	1.04373	0.0899376	26393	2220	24173	FALSE
submucosal	172.22	Squamous cell carcinoma	neoplasms	0.455374	0.268557	1.57676	0.931463	2.66911	0.089956	28236	2167	26069	FALSE
submucosal	681	Superficial cellulitis and abscess	dermatologic	0.139069	0.0821101	1.1492	0.978371	1.34987	0.0903236	28263	2187	26076	FALSE
submucosal	495.2	Asthma with exacerbation	respiratory	0.213125	0.12585	1.23754	0.967016	1.58374	0.0903626	26339	1966	24373	FALSE
submucosal	364.41	Keratoconus	sense organs	0.66446	0.392585	1.94344	0.90032	4.19514	0.0905454	28799	2220	26579	FALSE
submucosal	427.42	Cardiac arrest	circulatory system	-1.20759	0.716045	0.298918	0.0734585	1.21636	0.0917057	23534	1721	21813	FALSE
submucosal	297.1	Suicidal ideation	mental disorders	0.379514	0.225095	1.46157	0.94019	2.27209	0.0917933	20293	1400	18893	FALSE
submucosal	364.4	Corneal degenerations	sense organs	0.532379	0.315931	1.70298	0.916818	3.16327	0.0919672	28834	2224	26610	FALSE
submucosal	275.3	Disorders of magnesium metabolism	endocrine/metabolic	0.262145	0.156161	1.29972	0.95702	1.76512	0.0932135	29529	2282	27247	FALSE
submucosal	372	Disorders of conjunctiva	sense organs	0.388054	0.231566	1.47411	0.936304	2.32083	0.0937806	26420	1989	24431	FALSE
submucosal	159.4	Malignant neoplasm of retroperitoneum and peritoneum	neoplasms	0.680424	0.407235	1.97472	0.888913	4.38682	0.0947533	29572	2275	27297	FALSE
submucosal	250.42	Other abnormal glucose	endocrine/metabolic	0.198058	0.119169	1.21903	0.96511	1.53976	0.096514	26402	2000	24402	FALSE
submucosal	530.13	Barrett's esophagus	digestive	-1.67301	1.00734	0.187682	0.026059	1.35172	0.0967503	22841	1590	21251	FALSE
submucosal	697	Sarcoidosis	dermatologic	0.424209	0.255582	1.52838	0.926139	2.52225	0.0969592	26087	1888	24199	FALSE
submucosal	202.24	Large cell lymphoma	neoplasms	0.821861	0.49593	2.27473	0.860569	6.01275	0.0974765	30356	2365	27991	FALSE
submucosal	333.1	Essential tremor	neurological	0.389059	0.23488	1.47559	0.931177	2.3383	0.0976376	27771	2137	25634	FALSE
submucosal	528.4	Cysts of oral soft tissues	digestive	1.35572	0.818569	3.87955	0.779833	19.3002	0.09768	29402	2286	27116	FALSE
submucosal	297	Suicidal ideation or attempt	mental disorders	0.337837	0.204228	1.40191	0.939461	2.09201	0.0980835	20349	1405	18944	FALSE
submucosal	735.1	Flat foot	musculoskeletal	0.35262	0.213275	1.42279	0.936694	2.16115	0.0982579	27959	2103	25856	FALSE
submucosal	709.2	Sicca syndrome	dermatologic	0.417464	0.252495	1.51811	0.925495	2.49018	0.0982587	25850	1861	23989	FALSE
submucosal	565.1	Anal and rectal polyp	digestive	0.446685	0.270198	1.56312	0.92044	2.65455	0.0982954	26259	1923	24336	FALSE
submucosal	530.3	Stricture and stenosis of esophagus	digestive	0.409039	0.248034	1.50537	0.925789	2.44779	0.0991226	22935	1608	21327	FALSE
submucosal	287	Purpura and other hemorrhagic conditions	hematopoietic	0.204406	0.123953	1.2268	0.962192	1.56417	0.0991349	29005	2225	26780	FALSE
submucosal	281.11	Pernicious anemia	hematopoietic	0.592192	0.359126	1.80795	0.894317	3.65494	0.0991517	21098	1213	19885	FALSE
submucosal	358	Myoneural disorders	neurological	0.634769	0.386155	1.88659	0.885065	4.02141	0.100213	29125	2244	26881	FALSE
submucosal	946	Anaphylactic shock NOS	injuries & poisonings	0.568829	0.346068	1.7662	0.896314	3.48031	0.10024	25719	1846	23873	FALSE
submucosal	803.1	Fracture of humerus	injuries & poisonings	-0.688713	0.419118	0.502222	0.220869	1.14197	0.100333	28392	2191	26201	FALSE
submucosal	510.2	Lung transplant	respiratory	0.921089	0.560853	2.51202	0.836789	7.54105	0.100528	29595	2286	27309	FALSE
submucosal	444.1	Arterial embolism and thrombosis of lower extremity artery	circulatory system	0.813869	0.498144	2.25662	0.850022	5.99083	0.1023	28706	2215	26491	FALSE
submucosal	742.8	Articular cartilage disorder	musculoskeletal	0.667775	0.411045	1.94989	0.87121	4.36415	0.104252	26816	1956	24860	FALSE
submucosal	691	Congenital anomalies of skin	dermatologic	0.552013	0.340019	1.73675	0.89188	3.38194	0.104487	26029	1880	24149	FALSE
submucosal	528.5	Diseases of lips	digestive	-1.16008	0.71719	0.313461	0.0768599	1.2784	0.105763	29465	2286	27179	FALSE
submucosal	681.7	Cellulitis and abscess of trunk	dermatologic	0.2409	0.149281	1.27239	0.949622	1.70487	0.106586	26840	2048	24792	FALSE
submucosal	210	Benign neoplasm of lip, oral cavity, and pharynx	neoplasms	0.527902	0.329223	1.69537	0.889251	3.23225	0.108829	30998	2434	28564	FALSE
submucosal	286.8	Hypercoagulable state	hematopoietic	0.302485	0.18906	1.35322	0.934192	1.96019	0.109612	28519	2181	26338	FALSE
submucosal	394	Rheumatic disease of the heart valves	circulatory system	0.226894	0.142258	1.2547	0.949394	1.65818	0.110723	29386	2270	27116	FALSE
submucosal	585.3	Chronic renal failure [CKD]	genitourinary	-0.197746	0.12428	0.820578	0.643177	1.04691	0.111579	27726	2120	25606	FALSE
submucosal	394.2	Mitral valve disease	circulatory system	0.477773	0.300589	1.61248	0.894598	2.90644	0.111957	28934	2224	26710	FALSE
submucosal	711	Arthropathy associated with infections	musculoskeletal	-0.92743	0.590422	0.395569	0.12435	1.25835	0.116231	28322	2169	26153	FALSE
submucosal	282	Hereditary hemolytic anemias	hematopoietic	0.278446	0.177367	1.32108	0.933146	1.87027	0.116442	21451	1242	20209	FALSE
submucosal	145.4	Cancer of the gums	neoplasms	1.93548	1.23303	6.9274	0.618011	77.6505	0.116485	30925	2424	28501	FALSE
submucosal	418.1	Precordial pain	circulatory system	0.14507	0.0925368	1.15612	0.964349	1.38603	0.11695	23695	1677	22018	FALSE
submucosal	716.2	Unspecified monoarthritis	musculoskeletal	1.0554	0.673324	2.87313	0.767733	10.7523	0.11701	28255	2169	26086	FALSE
submucosal	313	Pervasive developmental disorders	mental disorders	0.249523	0.159283	1.28341	0.939252	1.75368	0.117223	30665	2393	28272	FALSE
submucosal	875	Non-healing surgical wound	injuries & poisonings	0.867474	0.554633	2.38089	0.802833	7.06078	0.117806	28631	2194	26437	FALSE
submucosal	289.9	Abnormality of red blood cells	hematopoietic	2.24075	1.43268	9.40037	0.567051	155.836	0.117812	25774	1869	23905	FALSE
submucosal	578.8	Hemorrhage of rectum and anus	digestive	0.224524	0.143939	1.25173	0.944032	1.65971	0.118793	25541	1840	23701	FALSE
submucosal	275.51	Hypocalcemia	endocrine/metabolic	0.336994	0.216216	1.40073	0.91687	2.13994	0.119091	29286	2259	27027	FALSE
submucosal	385.5	Tympanosclerosis and middle ear disease related to otitis media	sense organs	0.986667	0.634099	2.68228	0.774013	9.29522	0.119705	26244	1954	24290	FALSE
submucosal	427.6	Premature beats	circulatory system	0.262318	0.168833	1.29994	0.933704	1.80983	0.120254	23872	1760	22112	FALSE
submucosal	686.4	Pyogenic granuloma	dermatologic	1.00874	0.650995	2.74213	0.765509	9.8226	0.121255	26377	1998	24379	FALSE
submucosal	706.8	Other specified diseases of sebaceous glands	dermatologic	0.3725	0.240899	1.45136	0.905143	2.32719	0.122035	27226	1993	25233	FALSE
submucosal	415.21	Primary pulmonary hypertension	circulatory system	0.600927	0.388854	1.82381	0.851099	3.90821	0.122254	29065	2236	26829	FALSE
submucosal	134	Helminthiases	infectious diseases	1.01329	0.656308	2.75464	0.761036	9.97071	0.122607	30039	2323	27716	FALSE
submucosal	527.8	Other specified diseases of the salivary glands	digestive	0.64372	0.417103	1.90355	0.840464	4.31131	0.122755	29437	2291	27146	FALSE
submucosal	272.12	Hyperglyceridemia	endocrine/metabolic	0.368354	0.23896	1.44535	0.904829	2.30877	0.123199	24067	1742	22325	FALSE
submucosal	452.2	Deep vein thrombosis [DVT]	circulatory system	0.215564	0.139883	1.24056	0.943078	1.63188	0.123308	26177	1930	24247	FALSE
submucosal	282.9	Other hereditary hemolytic anemias	hematopoietic	0.499297	0.324216	1.64756	0.872697	3.11043	0.123557	21123	1215	19908	FALSE
submucosal	275	Disorders of mineral metabolism	endocrine/metabolic	0.148042	0.0963491	1.15956	0.960019	1.40058	0.124412	30440	2366	28074	FALSE
submucosal	912	Insect bite	injuries & poisonings	0.369122	0.240918	1.44646	0.902056	2.31943	0.125487	30222	2352	27870	FALSE
submucosal	255.22	Mineralocorticoid deficiency	endocrine/metabolic	1.2127	0.792573	3.36256	0.711243	15.8973	0.125996	27139	2003	25136	FALSE
submucosal	818.1	Subdural hemorrhage (injury)	injuries & poisonings	0.853672	0.558333	2.34825	0.786108	7.01468	0.126273	30631	2394	28237	FALSE
submucosal	287.3	Thrombocytopenia	hematopoietic	0.201179	0.131613	1.22284	0.944799	1.58271	0.126372	28908	2216	26692	FALSE
submucosal	528.11	Stomatitis and mucositis (ulcerative)	digestive	-1.54307	1.01039	0.213725	0.0294982	1.54851	0.126711	29447	2285	27162	FALSE
submucosal	286.1	Congenital coagulation defects	hematopoietic	0.518568	0.339774	1.67962	0.862958	3.26913	0.126956	28293	2159	26134	FALSE
submucosal	286.11	Von willebrand's disease	hematopoietic	0.833134	0.546417	2.30052	0.788325	6.71344	0.127329	28237	2153	26084	FALSE
submucosal	202.21	Nodular lymphoma	neoplasms	0.673532	0.442422	1.96115	0.823975	4.66776	0.127915	30371	2366	28005	FALSE
submucosal	574.3	Cholecystitis without cholelithiasis	digestive	0.30434	0.20018	1.35573	0.915748	2.0071	0.128429	29063	2261	26802	FALSE
submucosal	78	Viral warts & HPV	infectious diseases	0.209191	0.138579	1.23268	0.939484	1.61738	0.131161	25469	1871	23598	FALSE
submucosal	540.1	Appendicitis	digestive	0.371799	0.246566	1.45034	0.894517	2.35154	0.131579	30957	2408	28549	FALSE
submucosal	443.7	Peripheral angiopathy in diseases classified elsewhere	circulatory system	-0.636655	0.423643	0.529059	0.230617	1.21371	0.132888	28782	2216	26566	FALSE
submucosal	614.1	Pelvic peritoneal adhesions, female (postoperative) (postinfection)	genitourinary	0.28022	0.186928	1.32342	0.917448	1.90904	0.133853	21891	1356	20535	FALSE
submucosal	585.1	Acute renal failure	genitourinary	0.134088	0.0898005	1.14349	0.958946	1.36356	0.135391	28319	2205	26114	FALSE
submucosal	198.4	Secondary malignant neoplasm of liver	neoplasms	0.949036	0.635792	2.58322	0.742957	8.9817	0.13552	28139	2155	25984	FALSE
submucosal	361	Retinal detachments and defects	sense organs	0.359503	0.240931	1.43262	0.893399	2.29728	0.135662	28923	2232	26691	FALSE
submucosal	724.1	Disorders of sacrum	musculoskeletal	0.274449	0.184037	1.31581	0.917354	1.88733	0.135889	25967	1915	24052	FALSE
submucosal	691.3	Congenital pigmentary anomalies of skin	dermatologic	1.18149	0.793017	3.25921	0.688784	15.422	0.13626	25956	1872	24084	FALSE
submucosal	427.5	Arrhythmia (cardiac) NOS	circulatory system	0.151088	0.101733	1.1631	0.95284	1.41975	0.137506	24734	1840	22894	FALSE
submucosal	743.12	Senile osteoporosis	musculoskeletal	-0.625072	0.42103	0.535223	0.234502	1.22158	0.137643	28396	2199	26197	FALSE
submucosal	446.3	Hypersensitivity angiitis	circulatory system	1.21971	0.824224	3.38621	0.673164	17.0336	0.138918	28686	2212	26474	FALSE
submucosal	381.11	Suppurative and unspecified otitis media	sense organs	0.215385	0.145619	1.24034	0.932367	1.65004	0.139114	26788	2006	24782	FALSE
submucosal	229	Benign neoplasm of unspecified sites	neoplasms	0.441871	0.299366	1.55561	0.865119	2.79723	0.139939	30929	2420	28509	FALSE
submucosal	709	Diffuse diseases of connective tissue	dermatologic	0.256608	0.173995	1.29254	0.919044	1.81782	0.140265	26065	1881	24184	FALSE
submucosal	286.81	Primary hypercoagulable state	hematopoietic	0.297226	0.201631	1.34612	0.906675	1.99855	0.140453	28486	2177	26309	FALSE
submucosal	871	Open wounds of extremities	injuries & poisonings	0.190205	0.129172	1.2095	0.938971	1.55797	0.140886	29320	2260	27060	FALSE
submucosal	364.5	Corneal dystrophy	sense organs	0.567593	0.385496	1.76402	0.828632	3.75528	0.140921	28810	2220	26590	FALSE
submucosal	613.7	Other signs and symptoms in breast	genitourinary	0.243931	0.166068	1.27626	0.921676	1.76725	0.14187	26789	1929	24860	FALSE
submucosal	303.4	Somatoform disorder	mental disorders	-0.752565	0.512663	0.471156	0.172495	1.28692	0.142117	20182	1381	18801	FALSE
submucosal	727.2	Bursitis disorders	musculoskeletal	0.527825	0.360154	1.69524	0.836877	3.43401	0.14277	23067	1584	21483	FALSE
submucosal	31	Diseases due to other mycobacteria	infectious diseases	0.949734	0.649601	2.58502	0.723623	9.23456	0.143734	26651	2010	24641	FALSE
submucosal	523.1	Gingivitis	digestive	0.243246	0.166481	1.27538	0.920299	1.76747	0.143986	28702	2204	26498	FALSE
submucosal	498	Acute bronchospasm	respiratory	0.608751	0.416828	1.83813	0.812019	4.16091	0.14417	25672	1897	23775	FALSE
submucosal	938.2	Chronic dermatitis due to solar radiation	dermatologic	0.262092	0.179658	1.29965	0.913896	1.84822	0.144611	26073	1872	24201	FALSE
submucosal	285.21	Anemia in chronic kidney disease	hematopoietic	0.267179	0.183332	1.30627	0.911967	1.87107	0.145019	21415	1239	20176	FALSE
submucosal	755	Congenital anomalies of limbs	congenital anomalies	0.522641	0.359397	1.68648	0.833788	3.41118	0.145886	30722	2405	28317	FALSE
submucosal	594.1	Calculus of kidney	genitourinary	0.160909	0.111214	1.17458	0.944527	1.46066	0.147942	30012	2353	27659	FALSE
submucosal	374.3	Ptosis of eyelid	sense organs	0.33107	0.22959	1.39246	0.887874	2.1838	0.1493	26447	1989	24458	FALSE
submucosal	428.2	Heart failure NOS	circulatory system	0.358713	0.249082	1.43149	0.878546	2.33244	0.149828	28874	2221	26653	FALSE
submucosal	597.2	Urinary complications NEC	genitourinary	0.59076	0.411004	1.80536	0.806697	4.04033	0.150616	28706	2207	26499	FALSE
submucosal	365.1	Open-angle glaucoma	sense organs	0.21621	0.15055	1.24136	0.924162	1.66744	0.150964	29230	2265	26965	FALSE
submucosal	250.7	Diabetic retinopathy	endocrine/metabolic	-0.364758	0.254258	0.694365	0.421851	1.14292	0.151402	28872	2218	26654	FALSE
submucosal	842	Other sprains and strains	injuries & poisonings	0.264018	0.185449	1.30215	0.905324	1.87292	0.154542	26608	1975	24633	FALSE
submucosal	395.4	Nonrheumatic pulmonary valve disorders	circulatory system	0.635529	0.447241	1.88802	0.785791	4.53635	0.155317	28873	2217	26656	FALSE
submucosal	722.9	Other and unspecified disc disorder	musculoskeletal	0.510964	0.35974	1.6669	0.823554	3.37385	0.1555	25697	1890	23807	FALSE
submucosal	571.81	Portal hypertension	digestive	-0.595385	0.419262	0.55135	0.242406	1.25404	0.155585	26628	2018	24610	FALSE
submucosal	295.1	Schizophrenia	mental disorders	0.384983	0.271298	1.46959	0.8635	2.50109	0.155887	20211	1393	18818	FALSE
submucosal	503	Pulmonary congestion and hypostasis	respiratory	-0.331128	0.234252	0.718113	0.453726	1.13656	0.157492	27504	2092	25412	FALSE
submucosal	580.1	Glomerulonephritis	genitourinary	-0.833908	0.593448	0.434349	0.135733	1.38993	0.159964	26791	2046	24745	FALSE
submucosal	276.14	Hypopotassemia	endocrine/metabolic	0.125071	0.0891178	1.13323	0.95161	1.34951	0.160487	26792	2041	24751	FALSE
submucosal	573.2	Liver replaced by transplant	digestive	-1.41897	1.0113	0.241963	0.0333357	1.75626	0.160584	26542	2013	24529	FALSE
submucosal	149.3	Cancer of hypopharynx	neoplasms	1.72973	1.236	5.63911	0.500152	63.5798	0.161678	30925	2424	28501	FALSE
submucosal	723.1	Torticollis	musculoskeletal	0.6805	0.486327	1.97486	0.761321	5.12279	0.161733	25660	1886	23774	FALSE
submucosal	756	Other congenital musculoskeletal anomalies	congenital anomalies	-0.820446	0.589595	0.440235	0.138615	1.39816	0.164061	30733	2399	28334	FALSE
submucosal	907	Injuries to the nervous system	injuries & poisonings	-0.714967	0.513987	0.489208	0.17864	1.3397	0.164219	31052	2431	28621	FALSE
submucosal	803.21	Colles' fracture	injuries & poisonings	-0.818999	0.590097	0.440873	0.13868	1.40157	0.165166	28331	2188	26143	FALSE
submucosal	599.6	Oliguria and anuria	genitourinary	-1.39807	1.00901	0.247072	0.0341928	1.78531	0.165874	22458	1572	20886	FALSE
submucosal	669	Complications of labor and delivery NEC	pregnancy complications	-0.41417	0.299102	0.660889	0.367729	1.18776	0.166142	30673	2415	28258	FALSE
submucosal	755.1	Congenital deformities of feet	congenital anomalies	0.673418	0.487207	1.96093	0.754645	5.09543	0.16691	30686	2401	28285	FALSE
submucosal	451	Phlebitis and thrombophlebitis	circulatory system	0.358944	0.25974	1.43182	0.860582	2.38223	0.166991	25728	1887	23841	FALSE
submucosal	401.3	Other hypertensive complications	circulatory system	0.217089	0.157332	1.24245	0.912761	1.69123	0.167643	21438	1513	19925	FALSE
submucosal	347	Cataplexy and narcolepsy	neurological	0.66806	0.484876	1.95045	0.75405	5.0451	0.168266	27618	2121	25497	FALSE
submucosal	313.1	Attention deficit hyperactivity disorder	mental disorders	0.243911	0.177454	1.27623	0.901315	1.8071	0.169288	30575	2384	28191	FALSE
submucosal	189.21	Malignant neoplasm of bladder	neoplasms	-0.804412	0.589533	0.447351	0.140873	1.42059	0.172413	30950	2419	28531	FALSE
submucosal	276.5	Hypovolemia	endocrine/metabolic	0.121635	0.0891522	1.12934	0.948282	1.34497	0.172459	26770	2037	24733	FALSE
submucosal	327.31	Central/nonobstroctive sleep apnea	neurological	0.602457	0.441706	1.8266	0.768522	4.34141	0.172589	25003	1806	23197	FALSE
submucosal	202.2	Non-Hodgkins lymphoma	neoplasms	0.326873	0.239783	1.38662	0.866665	2.21854	0.172819	30513	2380	28133	FALSE
submucosal	750.13	Congenital anomalies of mouth/tongue	congenital anomalies	1.10413	0.810125	3.0166	0.61649	14.7608	0.172909	29853	2335	27518	FALSE
submucosal	696.41	Psoriasis vulgaris	dermatologic	0.290066	0.213039	1.33652	0.880301	2.02916	0.173336	25748	1853	23895	FALSE
submucosal	250.5	Glycosuria or Acetonuria	endocrine/metabolic	0.660417	0.487351	1.9356	0.744687	5.03104	0.175381	25594	1920	23674	FALSE
submucosal	938	Dermatitis due to solar radiation	dermatologic	0.225387	0.166477	1.25281	0.904016	1.73617	0.175781	26154	1878	24276	FALSE
submucosal	803	Fracture of upper limb	injuries & poisonings	-0.210279	0.155812	0.810358	0.5971	1.09978	0.177155	28947	2231	26716	FALSE
submucosal	473	Diseases of the larynx and vocal cords	respiratory	0.180213	0.133851	1.19747	0.921147	1.55669	0.178183	21938	1519	20419	FALSE
submucosal	274.1	Gout	endocrine/metabolic	0.24139	0.179798	1.27302	0.894925	1.81085	0.179415	30881	2424	28457	FALSE
submucosal	380.1	Otitis externa	sense organs	0.239142	0.178757	1.27016	0.894741	1.80309	0.18096	29161	2245	26916	FALSE
submucosal	420.2	Pericarditis	circulatory system	0.25388	0.190151	1.28902	0.887971	1.87119	0.181828	30331	2371	27960	FALSE
submucosal	575.8	Other disorders of biliary tract	digestive	-0.382596	0.287765	0.682088	0.388052	1.19892	0.183668	29036	2245	26791	FALSE
submucosal	333	Extrapyramidal disease and abnormal movement disorders	neurological	0.217922	0.164021	1.24349	0.901622	1.71498	0.183973	28024	2159	25865	FALSE
submucosal	740.3	Osteoarthrosis involving more than one site, but not specified as generalized	musculoskeletal	0.548402	0.413377	1.73049	0.769652	3.89082	0.184628	25103	1836	23267	FALSE
submucosal	249	Secondary diabetes mellitus	endocrine/metabolic	0.357406	0.269409	1.42962	0.843129	2.42407	0.184631	25695	1931	23764	FALSE
submucosal	625.1	Dyspareunia	genitourinary	0.257753	0.194678	1.29402	0.883543	1.8952	0.185504	27678	2041	25637	FALSE
submucosal	380.4	Impacted cerumen	sense organs	0.171419	0.129999	1.18699	0.920003	1.53145	0.187295	29525	2279	27246	FALSE
submucosal	560.2	Impaction of intestine	digestive	0.449856	0.342119	1.56809	0.801959	3.06611	0.18854	22656	1649	21007	FALSE
submucosal	395	Heart valve disorders	circulatory system	0.145349	0.110821	1.15644	0.93066	1.437	0.189668	29871	2310	27561	FALSE
submucosal	301	Personality disorders	mental disorders	-0.550003	0.420381	0.576948	0.253105	1.31514	0.190757	20216	1383	18833	FALSE
submucosal	279.8	Other specified disorders involving the immune mechanism	endocrine/metabolic	-1.31691	1.00834	0.267962	0.0371327	1.93371	0.191547	29427	2267	27160	FALSE
submucosal	752.1	Neural tube defects	congenital anomalies	0.49861	0.382704	1.64643	0.77764	3.48584	0.192623	30853	2420	28433	FALSE
submucosal	751.21	Cystic kidney disease	congenital anomalies	0.421996	0.324519	1.525	0.807298	2.88076	0.193474	29935	2344	27591	FALSE
submucosal	916	Contusion	injuries & poisonings	0.160574	0.123711	1.17418	0.921365	1.49638	0.194293	29902	2340	27562	FALSE
submucosal	803.2	Fracture of radius and ulna	injuries & poisonings	-0.276446	0.213321	0.758474	0.499296	1.15219	0.195004	28639	2209	26430	FALSE
submucosal	613.9	Breast disorder NOS	genitourinary	0.402178	0.310699	1.49508	0.813189	2.74875	0.195516	26471	1899	24572	FALSE
submucosal	613.1	Inflammatory disease of breast	genitourinary	0.336975	0.260498	1.4007	0.840633	2.33392	0.195809	26522	1904	24618	FALSE
submucosal	550.6	Incisional hernia	digestive	0.244799	0.189449	1.27736	0.881155	1.85173	0.196301	28494	2206	26288	FALSE
submucosal	790.6	Other abnormal blood chemistry	symptoms	-1.30156	1.01323	0.272108	0.0373477	1.98252	0.198944	31150	2442	28708	FALSE
submucosal	701.5	Abnormal granulation tissue	dermatologic	0.486039	0.379543	1.62586	0.7727	3.42103	0.200337	27701	2037	25664	FALSE
submucosal	155	Cancer of liver and intrahepatic bile duct	neoplasms	-1.28881	1.00697	0.275599	0.0382937	1.98349	0.200586	29561	2269	27292	FALSE
submucosal	191	Manlignant and unknown neoplasms of brain and nervous system	neoplasms	-0.537042	0.419766	0.584474	0.256716	1.33069	0.200761	30774	2400	28374	FALSE
submucosal	381.1	Otitis media	sense organs	0.149987	0.117317	1.16182	0.92316	1.46218	0.201079	27164	2037	25127	FALSE
submucosal	274	Gout and other crystal arthropathies	endocrine/metabolic	0.210534	0.164935	1.23434	0.893383	1.70541	0.201792	30960	2431	28529	FALSE
submucosal	647.3	Major puerperal infection	pregnancy complications	-0.757064	0.593638	0.469042	0.14652	1.5015	0.202205	29537	2353	27184	FALSE
submucosal	362.27	Drusen (degenerative) of retina	sense organs	-0.754209	0.591688	0.470383	0.147501	1.50005	0.202425	28697	2204	26493	FALSE
submucosal	261.41	Rickets or osteomalacia	endocrine/metabolic	0.801607	0.629025	2.22912	0.649675	7.6484	0.202535	24280	1690	22590	FALSE
submucosal	711.1	Pyogenic arthritis	musculoskeletal	-0.921495	0.723506	0.397924	0.0963694	1.64309	0.202787	28294	2168	26126	FALSE
submucosal	573.4	Acute and subacute necrosis of liver	digestive	-0.752431	0.590774	0.471219	0.148029	1.50003	0.202792	26567	2015	24552	FALSE
submucosal	550.5	Ventral hernia	digestive	0.215967	0.169701	1.24106	0.889899	1.7308	0.20315	28578	2214	26364	FALSE
submucosal	528.12	Oral aphthae	digestive	-1.28882	1.01514	0.275595	0.0376848	2.01547	0.204226	29428	2285	27143	FALSE
submucosal	388	Other disorders of ear	sense organs	0.518147	0.408197	1.67891	0.754335	3.73674	0.204314	28407	2188	26219	FALSE
submucosal	803.3	Fracture of clavicle or scapula	injuries & poisonings	0.453819	0.357969	1.57431	0.780516	3.17541	0.204883	28328	2194	26134	FALSE
submucosal	530.7	Gastroesophageal laceration-hemorrhage syndrome	digestive	0.994759	0.796147	2.70407	0.567969	12.874	0.211494	22778	1591	21187	FALSE
submucosal	270.2	Disorders of amino-acid metabolism	endocrine/metabolic	0.993123	0.795	2.69965	0.568316	12.8241	0.211588	29923	2309	27614	FALSE
submucosal	38.1	Gram negative septicemia	infectious diseases	-0.374117	0.300714	0.687897	0.381549	1.24021	0.213464	26828	2019	24809	FALSE
submucosal	962.2	Insulins and antidiabetic agents causing adverse effects in therapeutic use	injuries & poisonings	1.53908	1.23727	4.66029	0.412313	52.6744	0.213525	30258	2347	27911	FALSE
submucosal	362.8	Retinal hemorrhage/ischemia	sense organs	-1.25572	1.01045	0.284872	0.0393134	2.06423	0.213966	28664	2202	26462	FALSE
submucosal	535.1	Acute gastritis	digestive	-0.897601	0.723731	0.407546	0.0986563	1.68356	0.214886	28033	2122	25911	FALSE
submucosal	284.2	Constitutional aplastic anemia	hematopoietic	1.43943	1.16187	4.21831	0.432649	41.1282	0.215384	21027	1205	19822	FALSE
submucosal	426.8	Other cardiac conduction disorders	circulatory system	-0.894619	0.722984	0.408763	0.0990959	1.68612	0.215939	23510	1721	21789	FALSE
submucosal	710.1	Osteomyelitis	musculoskeletal	-0.452629	0.366669	0.635954	0.309964	1.30479	0.21704	28381	2174	26207	FALSE
submucosal	676	Other disorders of the breast associated with childbirth and disorders of lactation	pregnancy complications	-0.729299	0.591171	0.482247	0.151375	1.53633	0.217333	30256	2410	27846	FALSE
submucosal	841	Sprains and strains of back and neck	injuries & poisonings	0.184076	0.149364	1.20211	0.897019	1.61096	0.217802	26798	1995	24803	FALSE
submucosal	331	Other cerebral degenerations	neurological	-0.480915	0.390236	0.618218	0.287717	1.32836	0.217811	27718	2123	25595	FALSE
submucosal	351	Other peripheral nerve disorders	neurological	0.117408	0.0952903	1.12458	0.93299	1.35551	0.217909	29075	2253	26822	FALSE
submucosal	283.2	Non-autoimmune hemolytic anemias	hematopoietic	0.768327	0.624272	2.15616	0.634292	7.32944	0.218414	21045	1207	19838	FALSE
submucosal	709.7	Unspecified diffuse connective tissue disease	dermatologic	0.38009	0.308936	1.46242	0.798178	2.67943	0.218577	25789	1855	23934	FALSE
submucosal	379.1	Scleritis and episcleritis	sense organs	0.354933	0.289368	1.42609	0.80878	2.51455	0.21998	27387	2070	25317	FALSE
submucosal	395.1	Nonrheumatic mitral valve disorders	circulatory system	0.169027	0.137878	1.18415	0.90374	1.55157	0.22023	29467	2273	27194	FALSE
submucosal	300.3	Obsessive-compulsive disorders	mental disorders	-0.876999	0.717954	0.41603	0.101857	1.69926	0.221887	20151	1379	18772	FALSE
submucosal	801.1	Fracture of foot	injuries & poisonings	-0.309673	0.253636	0.733687	0.446284	1.20617	0.22211	28506	2202	26304	FALSE
submucosal	523	Gingival and periodontal diseases	digestive	0.184311	0.151339	1.20239	0.893764	1.61759	0.223274	28802	2213	26589	FALSE
submucosal	305.2	Eating disorder	mental disorders	0.315252	0.258882	1.3706	0.825178	2.27655	0.223321	20256	1394	18862	FALSE
submucosal	709.3	Systemic sclerosis	dermatologic	-1.22724	1.01368	0.2931	0.0401932	2.13736	0.226018	25718	1844	23874	FALSE
submucosal	580.12	Non-proliferative glomerulonephritis	genitourinary	-1.22864	1.01675	0.292691	0.0398964	2.14727	0.226895	26759	2044	24715	FALSE
submucosal	707	Chronic ulcer of skin	dermatologic	-0.240632	0.199139	0.786131	0.532089	1.16146	0.226908	30940	2421	28519	FALSE
submucosal	558	Noninfectious gastroenteritis	digestive	0.151299	0.125253	1.16334	0.910103	1.48705	0.227067	23410	1715	21695	FALSE
submucosal	526.3	Anomalies of jaw size/symmetry	digestive	0.657928	0.545333	1.93079	0.663037	5.62252	0.227636	28334	2166	26168	FALSE
submucosal	202	Cancer of other lymphoid, histiocytic tissue	neoplasms	0.287313	0.239243	1.33284	0.833932	2.13023	0.229781	30519	2380	28139	FALSE
submucosal	71	Human immunodeficiency virus [HIV] disease	infectious diseases	0.261652	0.218088	1.29907	0.847215	1.99193	0.230235	25008	1835	23173	FALSE
submucosal	204.21	Myeloid leukemia, acute	neoplasms	-0.861323	0.720097	0.422602	0.103032	1.73337	0.231649	30387	2362	28025	FALSE
submucosal	426.32	Left bundle branch block	circulatory system	0.343869	0.28759	1.41039	0.802673	2.47823	0.231818	23586	1733	21853	FALSE
submucosal	433.11	Occlusion of cerebral arteries, with cerebral infarction	circulatory system	-0.862571	0.721815	0.422076	0.102558	1.73705	0.232086	29261	2258	27003	FALSE
submucosal	755.3	Congenital anomaly of fingers/toes	congenital anomalies	1.47116	1.23282	4.35429	0.388616	48.7882	0.232739	30655	2397	28258	FALSE
submucosal	41.4	E. coli	infectious diseases	-0.237216	0.19905	0.788821	0.534003	1.16523	0.233361	27040	2035	25005	FALSE
submucosal	41.1	Staphylococcus infections	infectious diseases	0.213687	0.179406	1.23823	0.871143	1.76002	0.233623	26978	2043	24935	FALSE
submucosal	350.6	Disturbances of sensation of smell and taste	neurological	0.451704	0.37988	1.57099	0.746126	3.30775	0.234412	29399	2273	27126	FALSE
submucosal	270.32	Paraproteinemia	endocrine/metabolic	-0.436719	0.367415	0.646153	0.314474	1.32766	0.234587	30044	2315	27729	FALSE
submucosal	714.2	Juvenile rheumatoid arthritis	musculoskeletal	0.931684	0.786486	2.53878	0.543444	11.8603	0.236169	28339	2163	26176	FALSE
submucosal	277	Other disorders of metabolism	endocrine/metabolic	0.450443	0.380417	1.56901	0.744402	3.30706	0.236383	30133	2333	27800	FALSE
submucosal	70.4	Chronic hepatitis	infectious diseases	-0.699856	0.591443	0.496657	0.155815	1.58308	0.236689	24885	1813	23072	FALSE
submucosal	414	Other forms of chronic heart disease	circulatory system	-0.192142	0.162791	0.82519	0.599768	1.13534	0.237883	28757	2199	26558	FALSE
submucosal	769	Nonallopathic lesions NEC	symptoms	0.937005	0.794738	2.55233	0.537579	12.118	0.238393	31169	2444	28725	FALSE
submucosal	586.2	Cyst of kidney, acquired	genitourinary	0.179476	0.152686	1.19659	0.887108	1.61404	0.239811	27219	2094	25125	FALSE
submucosal	317	Alcohol-related disorders	mental disorders	-0.225625	0.192342	0.798018	0.547378	1.16342	0.240781	27809	2152	25657	FALSE
submucosal	523.3	Periodontitis (acute or chronic)	digestive	0.337858	0.28905	1.40194	0.795584	2.47044	0.242461	28420	2176	26244	FALSE
submucosal	401.2	Hypertensive heart and/or renal disease	circulatory system	0.116104	0.0994039	1.12311	0.924291	1.3647	0.242808	22499	1611	20888	FALSE
submucosal	840.3	Joint/ligament sprain	injuries & poisonings	0.206293	0.176803	1.22911	0.869149	1.73816	0.243292	26673	1978	24695	FALSE
submucosal	190	Cancer of eye	neoplasms	0.729958	0.627043	2.07499	0.60711	7.09196	0.244372	30667	2397	28270	FALSE
submucosal	716	Other arthropathies	musculoskeletal	0.174542	0.149986	1.1907	0.887426	1.59762	0.244536	28753	2219	26534	FALSE
submucosal	759	Other and unspecified congenital anomalies	congenital anomalies	0.417293	0.359133	1.51785	0.750806	3.06852	0.245258	30797	2416	28381	FALSE
submucosal	555.1	Regional enteritis	digestive	0.238077	0.205011	1.26881	0.84896	1.89629	0.245523	22867	1666	21201	FALSE
submucosal	286.4	Acquired coagulation factor deficiency	hematopoietic	-1.17386	1.01216	0.309172	0.0425235	2.24787	0.24615	28249	2150	26099	FALSE
submucosal	585.2	Renal failure NOS	genitourinary	-0.364896	0.314978	0.694269	0.374467	1.28719	0.246667	26888	2054	24834	FALSE
submucosal	318	Tobacco use disorder	mental disorders	-0.110271	0.095355	0.895591	0.74292	1.07964	0.247507	28998	2253	26745	FALSE
submucosal	293	Symptoms involving head and neck	mental disorders	0.415744	0.360081	1.5155	0.748253	3.06946	0.24826	29508	2265	27243	FALSE
submucosal	275.5	Disorders of calcium/phosphorus metabolism	endocrine/metabolic	0.174342	0.151027	1.19046	0.88544	1.60056	0.248346	29576	2285	27291	FALSE
submucosal	41.11	Methicillin sensitive Staphylococcus aureus	infectious diseases	0.300257	0.260385	1.35021	0.810506	2.24928	0.248857	26786	2024	24762	FALSE
submucosal	202.22	Reticulosarcoma	neoplasms	0.43907	0.380941	1.55126	0.735227	3.27302	0.249078	30393	2368	28025	FALSE
submucosal	334	Degenerative disease of the spinal cord	neurological	0.257526	0.224048	1.29372	0.833927	2.00704	0.250383	27791	2139	25652	FALSE
submucosal	701.1	Keratoderma, acquired	dermatologic	-0.830573	0.723628	0.4358	0.105517	1.79991	0.251056	27684	2031	25653	FALSE
submucosal	747.12	Valvular heart disease/ heart chambers	congenital anomalies	0.436	0.380237	1.54651	0.733986	3.25849	0.251526	30530	2381	28149	FALSE
submucosal	496.3	Bronchiectasis	respiratory	0.341505	0.297942	1.40706	0.784693	2.52306	0.251708	25744	1903	23841	FALSE
submucosal	306	Other mental disorder	mental disorders	0.315496	0.276756	1.37094	0.796964	2.35829	0.254294	20225	1392	18833	FALSE
submucosal	306.9	Tension headache	mental disorders	0.338416	0.296994	1.40272	0.78373	2.5106	0.254506	20205	1390	18815	FALSE
submucosal	275.1	Disorders of iron metabolism	hematopoietic	0.432551	0.379814	1.54118	0.732066	3.24458	0.254766	29144	2242	26902	FALSE
submucosal	286.7	Other and unspecified coagulation defects	hematopoietic	0.185761	0.163244	1.20413	0.874418	1.65818	0.255147	28645	2192	26453	FALSE
submucosal	261.3	Vitamin C deficiencies	endocrine/metabolic	0.544111	0.479179	1.72308	0.673625	4.40748	0.256164	24302	1692	22610	FALSE
submucosal	767	Cervicocranial/Cervicobrachial syndrome	symptoms	0.719043	0.634678	2.05247	0.5916	7.12074	0.257245	26792	1984	24808	FALSE
submucosal	274.11	Gouty arthropathy	endocrine/metabolic	0.307511	0.271966	1.36004	0.798082	2.31768	0.258184	30696	2403	28293	FALSE
submucosal	301.2	Antisocial/borderline personality disorder	mental disorders	-0.6657	0.5911	0.513914	0.161338	1.63698	0.260079	20158	1380	18778	FALSE
submucosal	70.9	Hepatitis NOS	infectious diseases	0.346219	0.308083	1.41371	0.772886	2.58587	0.261104	24925	1822	23103	FALSE
submucosal	427.11	Paroxysmal supraventricular tachycardia	circulatory system	0.201405	0.179286	1.22312	0.860711	1.73812	0.261281	23835	1755	22080	FALSE
submucosal	727.7	Contracture of tendon (sheath)	musculoskeletal	0.60719	0.541107	1.83527	0.635477	5.30027	0.261809	23023	1579	21444	FALSE
submucosal	704.12	Telogen effluvium	dermatologic	0.423942	0.378426	1.52797	0.727769	3.20803	0.262595	27402	1995	25407	FALSE
submucosal	204.2	Myeloid leukemia	neoplasms	-0.660969	0.590826	0.516351	0.16219	1.64386	0.263259	30401	2363	28038	FALSE
submucosal	362.21	Macular degeneration, dry	sense organs	-1.12815	1.01302	0.323631	0.0444372	2.35697	0.26543	28662	2202	26460	FALSE
submucosal	288.11	Neutropenia	hematopoietic	0.212903	0.191902	1.23727	0.849401	1.80224	0.267241	26104	1899	24205	FALSE
submucosal	580.2	Nephrotic syndrome without mention of glomerulonephritis	genitourinary	-0.571504	0.516469	0.564675	0.205197	1.55391	0.268484	26801	2047	24754	FALSE
submucosal	727.6	Rupture of tendon, nontraumatic	musculoskeletal	0.287999	0.260658	1.33376	0.800203	2.22307	0.269206	23161	1592	21569	FALSE
submucosal	286.12	Congenital deficiency of other clotting factors (including factor VII)	hematopoietic	0.483547	0.437643	1.62182	0.687817	3.82411	0.269207	28261	2155	26106	FALSE
submucosal	333.3	Tics and choreas	neurological	0.867077	0.787059	2.37994	0.508872	11.1308	0.270606	27593	2118	25475	FALSE
submucosal	358.1	Myasthenia gravis	neurological	0.59883	0.543678	1.81999	0.627019	5.28271	0.270704	29099	2240	26859	FALSE
submucosal	323	Encephalitis	neurological	-0.652844	0.593582	0.520563	0.162632	1.66625	0.271402	30931	2426	28505	FALSE
submucosal	586	Other disorders of the kidney and ureters	genitourinary	0.106079	0.096714	1.11191	0.919909	1.34398	0.272715	28125	2176	25949	FALSE
submucosal	172.3	Carcinoma in situ of skin	neoplasms	0.389347	0.355271	1.47602	0.735663	2.96144	0.273115	28177	2160	26017	FALSE
submucosal	427.3	Other specified cardiac dysrhythmias	circulatory system	-0.179617	0.164179	0.83559	0.605678	1.15278	0.273939	24070	1761	22309	FALSE
submucosal	277.6	Other deficiencies of circulating enzymes	endocrine/metabolic	1.22222	1.12032	3.39472	0.377715	30.51	0.275294	30074	2326	27748	FALSE
submucosal	444	Arterial embolism and thrombosis	circulatory system	0.338613	0.310653	1.403	0.763176	2.57924	0.275711	28779	2222	26557	FALSE
submucosal	364.51	Fuchs' dystrophy	sense organs	0.530803	0.4872	1.7003	0.654353	4.41812	0.275934	28789	2217	26572	FALSE
submucosal	8.52	Intestinal infection due to C. difficile	infectious diseases	-0.459551	0.422192	0.631567	0.276085	1.44476	0.27638	30224	2339	27885	FALSE
submucosal	189.2	Cancer of bladder	neoplasms	-0.558271	0.513871	0.572198	0.208992	1.56661	0.277301	30954	2420	28534	FALSE
submucosal	201	Hodgkin's disease	neoplasms	-0.784066	0.721758	0.456546	0.110946	1.8787	0.277334	30381	2362	28019	FALSE
submucosal	442.11	Abdominal aortic aneurysm	circulatory system	-1.10372	1.01815	0.331634	0.0450804	2.43966	0.278346	28709	2211	26498	FALSE
submucosal	1010	Other tests	NULL	-0.111036	0.102485	0.894906	0.73205	1.09399	0.278613	31189	2445	28744	FALSE
submucosal	348.4	Cerebral cysts	neurological	0.675329	0.62338	1.96468	0.578974	6.6669	0.278661	27604	2119	25485	FALSE
submucosal	571.6	Primary biliary cirrhosis	digestive	-1.09676	1.01248	0.333953	0.045903	2.42957	0.278705	26529	2013	24516	FALSE
submucosal	594	Urinary calculus	genitourinary	0.116391	0.107837	1.12344	0.909401	1.38784	0.280442	30118	2359	27759	FALSE
submucosal	536.7	Complications of gastrostomy, colostomy and enterostomy	digestive	-0.639639	0.594149	0.527483	0.164611	1.69028	0.281675	28045	2123	25922	FALSE
submucosal	8.6	Viral Enteritis	infectious diseases	0.34939	0.325597	1.4182	0.749177	2.68468	0.283237	30204	2344	27860	FALSE
submucosal	771	Musculoskeletal symptoms referable to limbs	symptoms	0.156241	0.146032	1.16911	0.878111	1.55654	0.28466	28054	2109	25945	FALSE
submucosal	292	Neurological disorders	mental disorders	0.116799	0.109328	1.12389	0.907118	1.39247	0.285367	29896	2325	27571	FALSE
submucosal	753	Congenital anomalies of the eye	congenital anomalies	0.519847	0.487676	1.68177	0.646619	4.37406	0.286438	30827	2417	28410	FALSE
submucosal	385	Other disorders of middle ear and mastoid	sense organs	0.461051	0.43425	1.58574	0.677004	3.71427	0.288363	26282	1957	24325	FALSE
submucosal	872	Traumatic amputation	injuries & poisonings	0.584397	0.550969	1.79391	0.609264	5.28196	0.28884	28633	2194	26439	FALSE
submucosal	255.11	Cushing's syndrome	endocrine/metabolic	-0.766188	0.722671	0.464782	0.112745	1.91601	0.289046	27181	2003	25178	FALSE
submucosal	276.12	Hyposmolality and/or hyponatremia	endocrine/metabolic	-0.150572	0.142073	0.860215	0.651137	1.13643	0.289224	25947	1935	24012	FALSE
submucosal	585.32	End stage renal disease	genitourinary	-0.211811	0.200065	0.809117	0.546654	1.1976	0.28973	27090	2071	25019	FALSE
submucosal	567	Peritonitis and retroperitoneal infections	digestive	0.193868	0.183302	1.21394	0.847551	1.7387	0.29022	26490	1941	24549	FALSE
submucosal	290.2	Delirium due to conditions classified elsewhere	mental disorders	0.293701	0.27772	1.34138	0.77831	2.31181	0.290264	28957	2239	26718	FALSE
submucosal	695.7	Prurigo and Lichen	dermatologic	0.25966	0.245629	1.29649	0.801097	2.09823	0.290456	26128	1889	24239	FALSE
submucosal	371	Inflammation of the eye	sense organs	0.109042	0.103202	1.11521	0.910981	1.36522	0.290699	27485	2083	25402	FALSE
submucosal	379.2	Disorders of vitreous body	sense organs	0.132088	0.125365	1.14121	0.89259	1.45908	0.292054	28119	2134	25985	FALSE
submucosal	830	Dislocation	injuries & poisonings	0.12611	0.119711	1.13441	0.897158	1.43439	0.292134	29866	2302	27564	FALSE
submucosal	444.2	Embolism and thrombosis of abdominal aorta	circulatory system	0.668309	0.635235	1.95094	0.56172	6.77589	0.29277	28697	2213	26484	FALSE
submucosal	525.1	Loss of teeth or edentulism	digestive	0.275037	0.261683	1.31658	0.788311	2.19885	0.293245	28453	2179	26274	FALSE
submucosal	713	Arthropathy associated with other disorders classified elsewhere	musculoskeletal	0.466133	0.44419	1.59382	0.667324	3.80664	0.293994	28286	2172	26114	FALSE
submucosal	79.2	Infectious mononucleosis	infectious diseases	-0.757636	0.722815	0.468773	0.113682	1.93302	0.294558	24864	1812	23052	FALSE
submucosal	362.3	Other nondiabetic retinopathy	sense organs	0.260218	0.248565	1.29721	0.796946	2.11151	0.295153	28781	2220	26561	FALSE
submucosal	636.2	Early onset of delivery	pregnancy complications	-0.294637	0.282139	0.744802	0.42843	1.2948	0.296347	25983	2191	23792	FALSE
submucosal	443	Peripheral vascular disease	circulatory system	-0.169403	0.162467	0.844169	0.613953	1.16071	0.29709	29245	2253	26992	FALSE
submucosal	362.2	Degeneration of macula and posterior pole of retina	sense organs	-0.234693	0.225132	0.790814	0.508672	1.22945	0.297194	28949	2223	26726	FALSE
submucosal	8.5	Bacterial enteritis	infectious diseases	0.214455	0.206503	1.23919	0.826719	1.85744	0.299033	30366	2360	28006	FALSE
submucosal	529	Diseases and other conditions of the tongue	digestive	0.350372	0.337631	1.4196	0.732433	2.75145	0.299392	29485	2294	27191	FALSE
submucosal	250.12	Type 1 diabetes with renal manifestations	endocrine/metabolic	0.373058	0.359821	1.45217	0.71735	2.9397	0.299835	25631	1924	23707	FALSE
submucosal	369	Infection of the eye	sense organs	0.127323	0.122823	1.13578	0.892784	1.44492	0.299906	27073	2046	25027	FALSE
submucosal	840.1	Muscle/tendon sprain	injuries & poisonings	0.656198	0.633769	1.92745	0.556555	6.67511	0.300487	26324	1944	24380	FALSE
submucosal	707.3	Chronic ulcer of unspecified site	dermatologic	-0.535398	0.517301	0.585436	0.212395	1.61367	0.300677	30614	2397	28217	FALSE
submucosal	440.2	Atherosclerosis of the extremities	circulatory system	-0.380263	0.369421	0.683682	0.331434	1.4103	0.303315	28798	2218	26580	FALSE
submucosal	596.1	Bladder neck obstruction	genitourinary	0.792893	0.77217	2.20978	0.48648	10.0377	0.304497	28669	2202	26467	FALSE
submucosal	530.15	Eosinophilic esophagitis	digestive	0.544806	0.531467	1.72427	0.608432	4.88653	0.305317	22805	1593	21212	FALSE
submucosal	350.1	Abnormal involuntary movements	neurological	0.135466	0.132217	1.14507	0.883663	1.48381	0.305567	30020	2332	27688	FALSE
submucosal	624.2	Atrophy of female genital tract	genitourinary	0.635695	0.621703	1.88833	0.558309	6.3868	0.306541	27387	2014	25373	FALSE
submucosal	292.6	Hallucinations	mental disorders	0.390334	0.381863	1.47747	0.698991	3.12297	0.306695	28886	2232	26654	FALSE
submucosal	871.1	Open wound of hand except finger(s)	injuries & poisonings	0.31451	0.307835	1.36959	0.749127	2.50394	0.306931	28720	2202	26518	FALSE
submucosal	572	Ascites (non malignant)	digestive	0.140299	0.137416	1.15062	0.878943	1.50627	0.307263	27167	2073	25094	FALSE
submucosal	259	Other endocrine disorders	endocrine/metabolic	0.193726	0.190566	1.21376	0.83545	1.76339	0.309354	27486	2032	25454	FALSE
submucosal	614.33	Pelvic inflammatory disease, NOS	genitourinary	0.263219	0.25929	1.30111	0.782713	2.16285	0.310033	21693	1340	20353	FALSE
submucosal	1012	Late effect	NULL	-1.02954	1.01554	0.357171	0.0488013	2.61409	0.310684	31189	2445	28744	FALSE
submucosal	580	Nephritis; nephrosis; renal sclerosis	genitourinary	-0.227611	0.225063	0.796434	0.512356	1.23802	0.311864	27011	2065	24946	FALSE
submucosal	275.6	Hypercalcemia	endocrine/metabolic	0.159696	0.157973	1.17315	0.860766	1.59891	0.312063	29546	2281	27265	FALSE
submucosal	800.2	Fracture of unspecified part of femur	injuries & poisonings	-0.521978	0.516376	0.593346	0.215655	1.63251	0.312088	28326	2189	26137	FALSE
submucosal	521.1	Dental caries	digestive	0.129408	0.128282	1.13815	0.885127	1.46351	0.313081	29007	2234	26773	FALSE
submucosal	198	Secondary malignant neoplasm	neoplasms	0.149675	0.148595	1.16146	0.867994	1.55414	0.313805	28749	2204	26545	FALSE
submucosal	550.1	Inguinal hernia	digestive	0.357413	0.355531	1.42963	0.712177	2.86983	0.314756	28263	2183	26080	FALSE
submucosal	586.12	Vesicoureteral reflux	genitourinary	0.776552	0.772814	2.17396	0.477991	9.88745	0.314975	26740	2045	24695	FALSE
submucosal	259.2	Carcinoid syndrome	endocrine/metabolic	0.62506	0.622582	1.86836	0.551452	6.33013	0.315388	27152	2004	25148	FALSE
submucosal	618.5	Prolapse of vaginal vault after hysterectomy	genitourinary	0.378954	0.377914	1.46076	0.696451	3.06383	0.31598	29577	2289	27288	FALSE
submucosal	359.1	Muscular dystrophies	neurological	0.777069	0.778622	2.17509	0.472824	10.0058	0.318277	29083	2238	26845	FALSE
submucosal	317.11	Alcoholic liver damage	mental disorders	-0.512901	0.515326	0.598756	0.21807	1.64401	0.319593	27471	2126	25345	FALSE
submucosal	250.6	Polyneuropathy in diabetes	endocrine/metabolic	0.148341	0.149335	1.15991	0.86558	1.55432	0.320542	26072	1969	24103	FALSE
submucosal	915	Superficial injury without mention of infection	injuries & poisonings	0.318874	0.322227	1.37558	0.731476	2.58685	0.322372	30811	2414	28397	FALSE
submucosal	758	Chromosomal anomalies and genetic disorders	congenital anomalies	0.47798	0.483329	1.61281	0.625412	4.15912	0.322696	30762	2412	28350	FALSE
submucosal	870.3	Other open wound of head and face	injuries & poisonings	0.401202	0.407226	1.49362	0.67236	3.31801	0.324522	28665	2197	26468	FALSE
submucosal	371.21	Allergic conjunctivitis	sense organs	0.160501	0.163018	1.1741	0.852984	1.6161	0.32484	26694	2011	24683	FALSE
submucosal	636.8	Cervical incompetence	pregnancy complications	-0.2773	0.281967	0.757827	0.436069	1.317	0.325388	25984	2191	23793	FALSE
submucosal	300.13	Phobia	mental disorders	0.290064	0.295112	1.33651	0.749496	2.38329	0.325658	20221	1390	18831	FALSE
submucosal	341	Other demyelinating diseases of central nervous system	neurological	0.290571	0.296237	1.33719	0.748223	2.38977	0.326656	27702	2129	25573	FALSE
submucosal	425.12	Other hypertrophic cardiomyopathy	circulatory system	0.47392	0.484241	1.60628	0.621765	4.14968	0.327736	30079	2344	27735	FALSE
submucosal	274.21	Chondrocalcinosis	endocrine/metabolic	0.349727	0.35851	1.41868	0.702611	2.86454	0.329311	30650	2396	28254	FALSE
submucosal	303.3	Psychogenic disorder	mental disorders	-0.576336	0.591369	0.561954	0.176326	1.79095	0.329769	20155	1380	18775	FALSE
submucosal	251	Other disorders of pancreatic internal secretion	endocrine/metabolic	0.371791	0.381816	1.45033	0.686212	3.06532	0.330184	27192	2009	25183	FALSE
submucosal	618.2	Uterine/Uterovaginal prolapse	genitourinary	-0.173656	0.178378	0.840586	0.592575	1.1924	0.330291	30047	2316	27731	FALSE
submucosal	200	Myeloproliferative disease	neoplasms	0.210523	0.217893	1.23432	0.805294	1.89192	0.333957	30560	2384	28176	FALSE
submucosal	634.3	Ectopic pregnancy	pregnancy complications	-0.281975	0.292135	0.754293	0.425471	1.33724	0.334434	25975	2190	23785	FALSE
submucosal	332	Parkinson's disease	neurological	0.461354	0.478969	1.58622	0.620378	4.05574	0.335436	27626	2121	25505	FALSE
submucosal	442	Other aneurysm	circulatory system	0.19528	0.202862	1.21565	0.816825	1.80921	0.335737	28956	2238	26718	FALSE
submucosal	509.2	Respiratory insufficiency	respiratory	0.265826	0.276286	1.30451	0.759045	2.24195	0.335978	27335	2087	25248	FALSE
submucosal	292.3	Memory loss	mental disorders	0.139051	0.144682	1.14918	0.865432	1.52597	0.336513	29413	2280	27133	FALSE
submucosal	575.7	Other disorders of gallbladder	digestive	0.229367	0.238859	1.2578	0.787574	2.00879	0.336925	29001	2252	26749	FALSE
submucosal	446.7	Takayasu's disease	circulatory system	1.12228	1.16942	3.07186	0.310434	30.3971	0.337211	28682	2211	26471	FALSE
submucosal	290.3	Other persistent mental disorders due to conditions classified elsewhere	mental disorders	0.297722	0.310389	1.34679	0.732978	2.47461	0.337463	28926	2236	26690	FALSE
submucosal	368.91	Psychophysical visual disturbances	sense organs	0.604987	0.631147	1.83123	0.531495	6.30937	0.337785	28784	2209	26575	FALSE
submucosal	585	Renal failure	genitourinary	0.0787539	0.0822759	1.08194	0.920805	1.27127	0.33847	28770	2239	26531	FALSE
submucosal	972	Poisoning by agents primarily affecting the cardiovascular system	injuries & poisonings	0.743989	0.777761	2.10431	0.458212	9.66394	0.338781	30267	2348	27919	FALSE
submucosal	132	Infestation (lice, mites)	infectious diseases	0.460753	0.481969	1.58527	0.616371	4.07721	0.339082	30064	2325	27739	FALSE
submucosal	370.2	Superficial keratitis	sense organs	-0.565928	0.594572	0.567833	0.177056	1.82109	0.341187	26304	1970	24334	FALSE
submucosal	480.2	Viral pneumonia	respiratory	0.362635	0.380993	1.43711	0.681055	3.03248	0.341191	25470	1866	23604	FALSE
submucosal	343	Infantile cerebral palsy	neurological	-0.968512	1.01866	0.379647	0.0515563	2.79563	0.34172	27611	2117	25494	FALSE
submucosal	966	Poisoning by anticonvulsants and anti-Parkinsonism drugs	injuries & poisonings	1.10407	1.16383	3.01643	0.308193	29.5232	0.342795	30259	2347	27912	FALSE
submucosal	710	Osteomyelitis, periostitis, and other infections involving bone	musculoskeletal	-0.265186	0.27967	0.767063	0.443375	1.32706	0.343023	28445	2180	26265	FALSE
submucosal	426.23	Second degree AV block	circulatory system	-0.965766	1.02028	0.380692	0.0515344	2.81222	0.343856	23486	1720	21766	FALSE
submucosal	425.1	Primary/intrinsic cardiomyopathies	circulatory system	-0.19187	0.203172	0.825414	0.554279	1.22918	0.344979	30393	2366	28027	FALSE
submucosal	1019	Other ill-defined and unknown causes of morbidity and mortality	NULL	0.154208	0.163905	1.16673	0.846161	1.60876	0.346787	31189	2445	28744	FALSE
submucosal	800	Fracture of lower limb	injuries & poisonings	0.120975	0.128742	1.1286	0.876902	1.45253	0.347388	29006	2256	26750	FALSE
submucosal	710.19	Unspecified osteomyelitis	musculoskeletal	-0.367543	0.393158	0.692434	0.320417	1.49638	0.349866	28353	2173	26180	FALSE
submucosal	53.1	Herpes zoster with nervous system complications	infectious diseases	-0.555065	0.59531	0.574035	0.178731	1.84364	0.351131	24872	1813	23059	FALSE
submucosal	480.5	Bronchopneumonia and lung abscess	respiratory	-0.674076	0.726027	0.509627	0.122814	2.11475	0.353177	25450	1860	23590	FALSE
submucosal	229.1	Benign neoplasm of lymph nodes	neoplasms	1.04447	1.1281	2.84189	0.311424	25.9336	0.354514	30830	2408	28422	FALSE
submucosal	433.31	Transient cerebral ischemia	circulatory system	0.184631	0.199941	1.20277	0.812814	1.77982	0.355785	29488	2285	27203	FALSE
submucosal	519.2	Respiratory complications	respiratory	-0.67116	0.727702	0.511115	0.122769	2.1279	0.356372	29168	2206	26962	FALSE
submucosal	364	Corneal opacity and other disorders of cornea	sense organs	0.221248	0.240007	1.24763	0.77945	1.99703	0.356612	28937	2232	26705	FALSE
submucosal	70.3	Viral hepatitis C	infectious diseases	-0.257376	0.279614	0.773077	0.4469	1.33732	0.357328	25019	1824	23195	FALSE
submucosal	726.2	Synoviopathy	musculoskeletal	0.271362	0.294813	1.31175	0.73604	2.33777	0.357335	23130	1588	21542	FALSE
submucosal	705.1	Dyshidrosis	dermatologic	0.330083	0.358636	1.39108	0.688773	2.80951	0.357372	27120	1982	25138	FALSE
submucosal	586.1	Anatomical abnormatilies of kidney and ureters	genitourinary	0.705128	0.767633	2.02411	0.449584	9.11287	0.358318	26741	2045	24696	FALSE
submucosal	274.2	Crystal arthropathies	endocrine/metabolic	0.311679	0.339336	1.36572	0.702283	2.65588	0.358358	30662	2397	28265	FALSE
submucosal	295	Schizophrenia and other psychotic disorders	mental disorders	0.190376	0.207279	1.2097	0.805823	1.81601	0.358382	20353	1404	18949	FALSE
submucosal	287.1	Spontaneous ecchymoses	hematopoietic	0.282304	0.307815	1.32618	0.725413	2.42449	0.359078	28324	2161	26163	FALSE
submucosal	348.9	Other conditions of brain, NOS	neurological	0.176483	0.195036	1.19301	0.814006	1.74849	0.365532	27895	2146	25749	FALSE
submucosal	263	Other nutritional deficiency	endocrine/metabolic	-0.417787	0.462286	0.658503	0.266104	1.62953	0.366132	24351	1692	22659	FALSE
submucosal	411.3	Angina pectoris	circulatory system	-0.181216	0.200547	0.834255	0.563106	1.23597	0.366201	28555	2184	26371	FALSE
submucosal	362.26	Macular puckering of retina	sense organs	-0.354663	0.392839	0.701409	0.324773	1.51483	0.366621	28741	2208	26533	FALSE
submucosal	911	Blister	injuries & poisonings	-0.923199	1.02473	0.397246	0.0533078	2.96025	0.367632	31111	2438	28673	FALSE
submucosal	315	Develomental delays and disorders	mental disorders	0.304467	0.338189	1.3559	0.698806	2.63088	0.367967	30282	2358	27924	FALSE
submucosal	357	Inflammatory and toxic neuropathy	neurological	0.110486	0.123693	1.11682	0.876383	1.42322	0.371735	29880	2313	27567	FALSE
submucosal	379.9	Pain, swelling or discharge of eye	sense organs	0.218976	0.24563	1.2448	0.769158	2.01458	0.372669	27456	2075	25381	FALSE
submucosal	723	Other disorders of cervical region	musculoskeletal	0.197961	0.222511	1.21892	0.788076	1.88529	0.373644	25865	1904	23961	FALSE
submucosal	963.1	Antineoplastic and immunosuppressive drugs causing adverse effects	injuries & poisonings	-0.526204	0.593122	0.590843	0.184755	1.88951	0.374984	30320	2349	27971	FALSE
submucosal	255.1	Adrenal hyperfunction	endocrine/metabolic	-0.373515	0.422849	0.688311	0.300503	1.5766	0.377058	27231	2007	25224	FALSE
submucosal	362.7	Hereditary retinal dystrophies	sense organs	0.425211	0.481727	1.52991	0.595131	3.93297	0.377409	28663	2206	26457	FALSE
submucosal	962	Poisoning by hormones and synthetic substitutes	injuries & poisonings	1.02801	1.16493	2.7955	0.285005	27.42	0.377524	30259	2347	27912	FALSE
submucosal	595	Hydronephrosis	genitourinary	0.130513	0.148176	1.13941	0.852218	1.52339	0.378428	29573	2310	27263	FALSE
submucosal	743.4	Stress fracture	musculoskeletal	-0.371135	0.422462	0.689951	0.301447	1.57915	0.379669	28369	2199	26170	FALSE
submucosal	315.2	Speech and language disorder	mental disorders	0.67387	0.76797	1.96181	0.435461	8.83826	0.380232	30206	2350	27856	FALSE
submucosal	204.12	Lymphoid leukemia, chronic	neoplasms	-0.635551	0.725566	0.529644	0.127752	2.19583	0.381064	30372	2362	28010	FALSE
submucosal	497	Bronchitis	respiratory	0.141177	0.162296	1.15163	0.837844	1.58293	0.384369	26096	1934	24162	FALSE
submucosal	337	Disorders of the autonomic nervous system	neurological	-0.284929	0.32837	0.752068	0.395133	1.43143	0.385554	27748	2126	25622	FALSE
submucosal	198.3	Secondary malignant neoplasm of digestive systems	neoplasms	0.953321	1.1012	2.59431	0.299683	22.4585	0.386648	28127	2153	25974	FALSE
submucosal	715.3	Spinal enthesopathy	musculoskeletal	0.418547	0.483629	1.51975	0.588979	3.92144	0.386803	28366	2166	26200	FALSE
submucosal	260.1	Cachexia	endocrine/metabolic	-0.629278	0.727606	0.532976	0.128043	2.2185	0.387115	24301	1689	22612	FALSE
submucosal	504.1	Idiopathic fibrosing alveolitis	respiratory	-0.879986	1.02142	0.414789	0.0560243	3.07098	0.388945	27223	2073	25150	FALSE
submucosal	348	Other conditions of brain	neurological	-0.121448	0.14111	0.885637	0.671646	1.16781	0.389423	28324	2173	26151	FALSE
submucosal	500	Lung disease due to external agents	respiratory	0.410453	0.47812	1.5075	0.590572	3.84806	0.390632	27241	2077	25164	FALSE
submucosal	250.23	Type 2 diabetes with ophthalmic manifestations	endocrine/metabolic	-0.186554	0.217484	0.829813	0.541819	1.27089	0.391012	25853	1939	23914	FALSE
submucosal	722.8	Postlaminectomy syndrome	musculoskeletal	0.253772	0.296091	1.28888	0.721396	2.30277	0.391404	25753	1894	23859	FALSE
submucosal	724.2	Disorders of coccyx	musculoskeletal	0.171433	0.201129	1.18701	0.800291	1.76059	0.394018	25938	1909	24029	FALSE
submucosal	1013	Asphyxia and hypoxemia	NULL	0.099581	0.116876	1.10471	0.878538	1.3891	0.394202	31189	2445	28744	FALSE
submucosal	303	Psychogenic and somatoform disorders	mental disorders	-0.279425	0.328775	0.756218	0.396998	1.44048	0.395382	20253	1387	18866	FALSE
submucosal	521	Diseases of hard tissues of teeth	digestive	0.108888	0.128168	1.11504	0.867342	1.43347	0.395563	29019	2234	26785	FALSE
submucosal	513.31	Apnea	respiratory	0.525732	0.619505	1.6917	0.50233	5.69713	0.396086	30160	2347	27813	FALSE
submucosal	110.13	Dermatophytosis of the body	infectious diseases	0.286272	0.337859	1.33145	0.68665	2.58177	0.39682	25952	1871	24081	FALSE
submucosal	277.4	Disorders of bilirubin excretion	endocrine/metabolic	-0.39127	0.462028	0.676198	0.273393	1.67248	0.397077	30158	2330	27828	FALSE
submucosal	362.31	Separation of retinal layers	sense organs	0.642866	0.762511	1.90192	0.426708	8.47726	0.399177	28639	2203	26436	FALSE
submucosal	368.4	Visual field defects	sense organs	0.249405	0.295977	1.28326	0.718413	2.29222	0.399424	28887	2219	26668	FALSE
submucosal	695.9	Unspecified erythematous condition	dermatologic	-0.49946	0.592784	0.606858	0.189889	1.93944	0.399471	26012	1873	24139	FALSE
submucosal	292.2	Mild cognitive impairment	mental disorders	0.225664	0.268231	1.25315	0.740768	2.11996	0.400177	28976	2240	26736	FALSE
submucosal	550.3	Femoral hernia	digestive	0.645837	0.767906	1.90758	0.423476	8.59286	0.400328	28195	2176	26019	FALSE
submucosal	130	Spirochetal infection	infectious diseases	0.640315	0.764062	1.89708	0.424329	8.48141	0.402008	30040	2322	27718	FALSE
submucosal	260.2	severe protein-calorie malnutrition	endocrine/metabolic	-0.1757	0.210384	0.83887	0.555408	1.267	0.40364	24641	1712	22929	FALSE
submucosal	531	Peptic ulcer (excl. esophageal)	digestive	0.151135	0.181516	1.16315	0.814943	1.66015	0.405055	30632	2393	28239	FALSE
submucosal	378	Strabismus and other disorders of binocular eye movements	sense organs	0.198188	0.238152	1.21919	0.764457	1.94442	0.405301	27479	2076	25403	FALSE
submucosal	331.1	Hydrocephalus	neurological	-0.382241	0.462394	0.682331	0.275675	1.68885	0.408432	27670	2121	25549	FALSE
submucosal	429	Ill-defined descriptions and complications of heart disease	circulatory system	0.135287	0.163747	1.14487	0.830558	1.57812	0.408694	29165	2245	26920	FALSE
submucosal	396	Abnormal heart sounds	circulatory system	0.51419	0.622475	1.67228	0.493683	5.66463	0.408781	28857	2214	26643	FALSE
submucosal	531.4	Peptic ulcer, site unspecified	digestive	0.336707	0.408186	1.40033	0.62918	3.11663	0.409436	30344	2365	27979	FALSE
submucosal	536	Disorders of function of stomach	digestive	0.121442	0.147603	1.12912	0.845471	1.50794	0.410646	28536	2173	26363	FALSE
submucosal	260.3	Adult failure to thrive	endocrine/metabolic	0.180233	0.219466	1.1975	0.778862	1.84114	0.411514	24510	1711	22799	FALSE
submucosal	952	Spinal cord injury without evidence of spinal bone injury	injuries & poisonings	-0.841302	1.02486	0.431149	0.0578426	3.21371	0.411707	31160	2442	28718	FALSE
submucosal	727.5	Rupture of synovium	musculoskeletal	0.251916	0.308467	1.28649	0.702803	2.35493	0.414115	23113	1587	21526	FALSE
submucosal	426.3	Bundle branch block	circulatory system	0.195782	0.239822	1.21626	0.760127	1.94611	0.414293	23666	1739	21927	FALSE
submucosal	739	Contracture of joint	musculoskeletal	-0.300553	0.368236	0.740409	0.359768	1.52377	0.414388	27874	2085	25789	FALSE
submucosal	369.5	Conjunctivitis, infectious	sense organs	0.109906	0.134658	1.11617	0.857251	1.4533	0.414396	26933	2032	24901	FALSE
submucosal	416	Cardiomegaly	circulatory system	0.0966155	0.118437	1.10144	0.87326	1.38923	0.414642	29870	2314	27556	FALSE
submucosal	270.3	Disorders of plasma protein metabolism	endocrine/metabolic	-0.213971	0.262605	0.807372	0.482548	1.35085	0.415186	30131	2323	27808	FALSE
submucosal	71.1	HIV infection, symptomatic	infectious diseases	0.187786	0.231279	1.20658	0.766806	1.89856	0.416822	24993	1832	23161	FALSE
submucosal	433.1	Occlusion and stenosis of precerebral arteries	circulatory system	0.142662	0.175844	1.15334	0.817102	1.62794	0.417192	29591	2294	27297	FALSE
submucosal	279.11	Deficiency of humoral immunity	endocrine/metabolic	0.303763	0.375878	1.35495	0.648587	2.83059	0.419009	29461	2274	27187	FALSE
submucosal	580.4	Renal sclerosis, NOS	genitourinary	-0.376326	0.465963	0.686378	0.275377	1.7108	0.419303	26801	2048	24753	FALSE
submucosal	385.3	Cholesteatoma	sense organs	0.428765	0.531005	1.53536	0.542262	4.34721	0.419403	26264	1955	24309	FALSE
submucosal	733.4	Aseptic necrosis of bone	musculoskeletal	-0.342772	0.424732	0.7098	0.308743	1.63183	0.419649	25829	1899	23930	FALSE
submucosal	443.9	Peripheral vascular disease, unspecified	circulatory system	-0.171532	0.212589	0.842373	0.555322	1.2778	0.41974	28993	2235	26758	FALSE
submucosal	204	Leukemia	neoplasms	-0.232396	0.289255	0.792632	0.449628	1.3973	0.421727	30525	2373	28152	FALSE
submucosal	428.4	Heart failure with preserved EF [Diastolic heart failure]	circulatory system	-0.127401	0.15871	0.880381	0.645021	1.20162	0.42213	29280	2248	27032	FALSE
submucosal	585.34	Chronic Kidney Disease, Stage IV	genitourinary	0.153648	0.191669	1.16608	0.800896	1.69778	0.422767	27022	2075	24947	FALSE
submucosal	361.1	Retinal detachment with retinal defect	sense organs	-0.582324	0.726608	0.558599	0.134462	2.3206	0.422884	28794	2214	26580	FALSE
submucosal	362.4	Retinal vascular changes and abnomalities	sense organs	-0.369278	0.463894	0.691233	0.278452	1.71593	0.426008	28706	2206	26500	FALSE
submucosal	350	Abnormal movement	neurological	0.090308	0.113855	1.09451	0.875598	1.36816	0.427671	30322	2356	27966	FALSE
submucosal	371.33	Noninfectious dermatoses of eyelid	sense organs	0.489468	0.618184	1.63145	0.485696	5.48002	0.428487	26269	1970	24299	FALSE
submucosal	524	Dentofacial anomalies, including malocclusion	digestive	0.211034	0.267335	1.23495	0.731293	2.0855	0.429877	28456	2178	26278	FALSE
submucosal	275.53	Disorders of phosphorus metabolism	endocrine/metabolic	0.172256	0.218404	1.18798	0.774285	1.82271	0.430285	29308	2258	27050	FALSE
submucosal	599.8	Other symptoms involving urinary system	genitourinary	0.174628	0.221626	1.1908	0.771237	1.83862	0.430732	22681	1594	21087	FALSE
submucosal	1001	Foreign body injury	NULL	0.19796	0.251534	1.21891	0.744496	1.99564	0.431277	31189	2445	28744	FALSE
submucosal	800.4	Fracture of patella	injuries & poisonings	0.278889	0.354763	1.32166	0.659386	2.64911	0.431793	28338	2194	26144	FALSE
submucosal	355	Complex regional/central pain syndrome	neurological	0.209262	0.266303	1.23277	0.731475	2.07761	0.431982	27817	2133	25684	FALSE
submucosal	1007	Injury to blood vessels	NULL	-0.569615	0.726448	0.565743	0.136224	2.34955	0.432976	31189	2445	28744	FALSE
submucosal	420	Carditis	circulatory system	0.133906	0.171575	1.14329	0.816784	1.6003	0.435124	30431	2378	28053	FALSE
submucosal	531.1	Hemorrhage from gastrointestinal ulcer	digestive	-0.463866	0.598318	0.628848	0.194647	2.03163	0.438172	30339	2361	27978	FALSE
submucosal	588.1	Renal osteodystrophy	genitourinary	-0.16776	0.216921	0.845557	0.552709	1.29357	0.439304	27011	2067	24944	FALSE
submucosal	772.4	Rhabdomyolysis	symptoms	-0.462317	0.597818	0.629822	0.19514	2.03278	0.43932	26579	1985	24594	FALSE
submucosal	752.11	Spina bifida	congenital anomalies	0.370154	0.478719	1.44796	0.566581	3.70041	0.439394	30836	2417	28419	FALSE
submucosal	224	Benign neoplasm of eye	neoplasms	0.246204	0.31979	1.27916	0.683462	2.39406	0.441364	30759	2405	28354	FALSE
submucosal	531.2	Gastric ulcer	digestive	0.227612	0.296444	1.2556	0.702284	2.24486	0.442601	30409	2371	28038	FALSE
submucosal	452.1	Iatrogenic pulmonary embolism and infarction	circulatory system	0.590429	0.769787	1.80476	0.399176	8.15974	0.44308	25585	1872	23713	FALSE
submucosal	441.1	Acute vascular insufficiency of intestine	circulatory system	-0.785777	1.02578	0.455765	0.0610345	3.40335	0.443661	28701	2211	26490	FALSE
submucosal	586.3	Vascular disorders of kidney/hypertrophy	genitourinary	0.476967	0.622866	1.61118	0.475281	5.46183	0.443818	26750	2046	24704	FALSE
submucosal	840.2	Rotator cuff (capsule) sprain	injuries & poisonings	0.226242	0.296699	1.25388	0.700972	2.24291	0.445742	26431	1954	24477	FALSE
submucosal	556.11	Angiodysplasia of intestine (without mention of hemorrhage)	digestive	-0.77832	1.02362	0.459177	0.061753	3.4143	0.447039	22602	1640	20962	FALSE
submucosal	856	Vascular complications of surgery and medical procedures	injuries & poisonings	0.583803	0.769321	1.79284	0.396902	8.09845	0.447939	29465	2273	27192	FALSE
submucosal	447.7	Aortic ectasia	circulatory system	-0.229109	0.302325	0.795242	0.439699	1.43828	0.448556	28852	2222	26630	FALSE
submucosal	574.11	Cholelithiasis with acute cholecystitis	digestive	0.255541	0.337401	1.29116	0.666467	2.50139	0.448822	28902	2242	26660	FALSE
submucosal	379.4	Anomalies of pupillary function	sense organs	0.401657	0.531864	1.4943	0.526872	4.23809	0.450136	27313	2060	25253	FALSE
submucosal	509	Respiratory failure, insufficiency, arrest	respiratory	-0.0905922	0.120066	0.91339	0.721862	1.15574	0.450537	28213	2153	26060	FALSE
submucosal	446.4	Wegener's granulomatosis	circulatory system	0.814804	1.081	2.25873	0.271458	18.7944	0.450997	28685	2211	26474	FALSE
submucosal	496.2	Chronic bronchitis	respiratory	0.156027	0.207735	1.16886	0.777919	1.75626	0.452599	25894	1917	23977	FALSE
submucosal	270.35	Macroglobulinemia	endocrine/metabolic	0.809682	1.0826	2.24719	0.269223	18.7572	0.454518	29920	2308	27612	FALSE
submucosal	433.3	Cerebral ischemia	circulatory system	0.131076	0.175277	1.14005	0.808586	1.6074	0.454569	29591	2294	27297	FALSE
submucosal	224.1	Benign neoplasm of eye, uveal	neoplasms	-0.344325	0.462108	0.708698	0.286489	1.75314	0.4562	30736	2399	28337	FALSE
submucosal	537	Other disorders of stomach and duodenum	digestive	0.121644	0.163428	1.12935	0.819816	1.55576	0.456678	28441	2163	26278	FALSE
submucosal	577	Diseases of pancreas	digestive	-0.130645	0.175963	0.877529	0.621554	1.23892	0.457809	30961	2428	28533	FALSE
submucosal	275.11	Hereditary hemochromatosis	hematopoietic	0.559214	0.753878	1.7493	0.399162	7.66616	0.458219	29094	2236	26858	FALSE
submucosal	836	Traumatic arthropathy	injuries & poisonings	0.458548	0.618415	1.58178	0.470695	5.31558	0.458397	29017	2223	26794	FALSE
submucosal	969	Poisoning by psychotropic agents	injuries & poisonings	-0.539222	0.728024	0.583202	0.139995	2.42955	0.458897	30294	2348	27946	FALSE
submucosal	386.3	Labyrinthitis	sense organs	-0.535296	0.724104	0.585496	0.14163	2.42043	0.459753	25843	1875	23968	FALSE
submucosal	526.5	Inflammatory conditions of jaw	digestive	-0.757162	1.02502	0.468996	0.0629005	3.4969	0.460101	28330	2163	26167	FALSE
submucosal	737.1	Kyphosis (acquired)	musculoskeletal	0.317691	0.434492	1.37395	0.586307	3.21972	0.46467	27811	2083	25728	FALSE
submucosal	368.2	Diplopia and disorders of binocular vision	sense organs	0.182793	0.25048	1.20057	0.734807	1.96155	0.465529	28950	2224	26726	FALSE
submucosal	695.1	Toxic erythema	dermatologic	0.560041	0.76902	1.75074	0.38781	7.90362	0.466459	25960	1872	24088	FALSE
submucosal	170.2	Cancer of connective tissue	neoplasms	0.213811	0.293797	1.23839	0.69626	2.20263	0.466767	31069	2435	28634	FALSE
submucosal	805	Fracture of vertebral column without mention of spinal cord injury	injuries & poisonings	-0.155872	0.214356	0.855668	0.562136	1.30247	0.467125	28600	2209	26391	FALSE
submucosal	377	Disorders of optic nerve and visual pathways	sense organs	0.157166	0.217295	1.17019	0.764349	1.79152	0.469503	27523	2080	25443	FALSE
submucosal	577.3	Cyst and pseudocyst of pancreas	digestive	-0.208942	0.289354	0.811442	0.460208	1.43074	0.470234	30672	2405	28267	FALSE
submucosal	368.9	Subjective visual disturbances	sense organs	0.147872	0.205076	1.15936	0.775631	1.73294	0.470875	29045	2233	26812	FALSE
submucosal	529.6	Glossodynia	digestive	-0.736024	1.02088	0.479015	0.064768	3.54272	0.470927	29420	2285	27135	FALSE
submucosal	818.2	Subarachnoid hemorrhage (injury)	injuries & poisonings	-0.737817	1.025	0.478157	0.064132	3.56505	0.471634	30632	2391	28241	FALSE
submucosal	597.1	Urethral stricture (not specified as infectious)	genitourinary	0.793665	1.10295	2.21149	0.254587	19.2103	0.471781	28662	2201	26461	FALSE
submucosal	749	Congenital anomalies of face and neck	congenital anomalies	0.342045	0.476398	1.40782	0.553388	3.58151	0.47277	31071	2434	28637	FALSE
submucosal	772	Symptoms of the muscles	symptoms	0.12529	0.174508	1.13348	0.805134	1.59572	0.472782	26954	2019	24935	FALSE
submucosal	420.21	Acute pericarditis	circulatory system	-0.521906	0.729879	0.593388	0.141923	2.48099	0.474573	30078	2341	27737	FALSE
submucosal	695.4	Lupus (localized and systemic)	dermatologic	0.143937	0.20159	1.15481	0.777883	1.71438	0.475221	26014	1879	24135	FALSE
submucosal	204.4	Multiple myeloma	neoplasms	-0.330681	0.464625	0.718434	0.288995	1.78601	0.476641	30407	2365	28042	FALSE
submucosal	788	Syncope and collapse	symptoms	0.104425	0.146881	1.11007	0.832384	1.4804	0.477114	30449	2376	28073	FALSE
submucosal	720	Spinal stenosis	musculoskeletal	0.0995417	0.1402	1.10466	0.839248	1.45402	0.477704	26292	1942	24350	FALSE
submucosal	459	Other disorders of circulatory system	circulatory system	0.137826	0.19424	1.14778	0.784362	1.67957	0.477975	28867	2253	26614	FALSE
submucosal	751.2	Congenital anomalies of urinary system	congenital anomalies	0.187647	0.265374	1.20641	0.717138	2.02948	0.479503	30008	2349	27659	FALSE
submucosal	637	Short gestation; low birth weight; and fetal growth retardation	pregnancy complications	-0.725669	1.02856	0.484001	0.0644641	3.63391	0.480487	25822	2178	23644	FALSE
submucosal	750.21	Congenital anomalies of intestine	congenital anomalies	0.237386	0.33676	1.26793	0.6553	2.4533	0.480864	29939	2343	27596	FALSE
submucosal	695.41	Cutaneous lupus erythematosus	dermatologic	0.266853	0.380163	1.30585	0.619857	2.75102	0.482714	25789	1859	23930	FALSE
submucosal	520.2	Disturbances in tooth eruption	digestive	0.209083	0.297901	1.23255	0.687424	2.20995	0.482771	28422	2175	26247	FALSE
submucosal	227.2	Benign neoplasm of parathyroid gland	neoplasms	0.33695	0.481408	1.40067	0.545196	3.59847	0.483974	30383	2354	28029	FALSE
submucosal	81.1	Graft-versus-host disease	infectious diseases	-0.713778	1.02114	0.48979	0.0661911	3.62427	0.48455	30484	2390	28094	FALSE
submucosal	427.8	Sinoatrial node dysfunction (Bradycardia)	circulatory system	0.206994	0.296771	1.22998	0.687511	2.20046	0.485498	23590	1732	21858	FALSE
submucosal	560.3	Peritoneal or intestinal adhesions	digestive	-0.508543	0.729697	0.601371	0.143884	2.51347	0.48585	22615	1641	20974	FALSE
submucosal	575.2	Obstruction of bile duct	digestive	-0.294131	0.422651	0.745179	0.325457	1.70619	0.486479	28910	2238	26672	FALSE
submucosal	204.11	Lymphoid leukemia, acute	neoplasms	-0.505956	0.727495	0.602929	0.14488	2.50912	0.486756	30367	2362	28005	FALSE
submucosal	727.8	Plica syndrome	musculoskeletal	0.523362	0.753397	1.68769	0.385468	7.38921	0.487263	23011	1577	21434	FALSE
submucosal	716.9	Arthropathy NOS	musculoskeletal	0.120394	0.173377	1.12794	0.80298	1.58441	0.487427	28635	2205	26430	FALSE
submucosal	753.2	Congenital anomalies of posterior segment of eye	congenital anomalies	0.760997	1.09822	2.14041	0.248701	18.4212	0.488348	30799	2413	28386	FALSE
submucosal	320	Meningitis	neurological	0.234264	0.338302	1.26398	0.651285	2.45306	0.488642	30958	2433	28525	FALSE
submucosal	276.8	Polydipsia	endocrine/metabolic	-0.706887	1.02233	0.493177	0.0664931	3.65788	0.489286	25169	1879	23290	FALSE
submucosal	443.1	Raynaud's syndrome	circulatory system	-0.207069	0.300137	0.812963	0.451428	1.46404	0.490247	28865	2222	26643	FALSE
submucosal	426.24	Atrioventricular block, complete	circulatory system	-0.409681	0.596752	0.663862	0.206116	2.13817	0.492386	23513	1722	21791	FALSE
submucosal	742.2	Pathological, developmental or recurrent dislocation	musculoskeletal	-0.699695	1.0202	0.496737	0.0672536	3.66891	0.492813	26793	1950	24843	FALSE
submucosal	477	Epistaxis or throat hemorrhage	respiratory	0.158975	0.232524	1.17231	0.743213	1.84914	0.49417	21419	1473	19946	FALSE
submucosal	315.3	Mental retardation	mental disorders	0.298316	0.437423	1.34759	0.571761	3.17614	0.495248	30244	2354	27890	FALSE
submucosal	260	Protein-calorie malnutrition	endocrine/metabolic	0.0833942	0.122389	1.08697	0.855142	1.38165	0.495627	25223	1767	23456	FALSE
submucosal	253.2	Pituitary hypofunction	endocrine/metabolic	-0.695214	1.02228	0.498968	0.0672807	3.70045	0.496465	27154	2002	25152	FALSE
submucosal	170	Cancer of bone and connective tissue	neoplasms	0.179781	0.264647	1.19696	0.712534	2.01071	0.496933	31105	2438	28667	FALSE
submucosal	707.2	Chronic ulcer of leg or foot	dermatologic	0.166925	0.245869	1.18167	0.729806	1.9133	0.497188	30721	2412	28309	FALSE
submucosal	425.11	Hypertrophic obstructive cardiomyopathy	circulatory system	0.416957	0.62108	1.51734	0.449167	5.12574	0.502003	30066	2342	27724	FALSE
submucosal	255.3	Adrenogenital disorders	endocrine/metabolic	0.508886	0.75945	1.66344	0.375447	7.36993	0.502813	27145	2003	25142	FALSE
submucosal	961	Poisoning by other anti-infectives	injuries & poisonings	-0.346738	0.518534	0.706991	0.255875	1.95344	0.503695	30319	2350	27969	FALSE
submucosal	323.8	Encephalitis, non-infectious	neurological	-0.484211	0.72961	0.616183	0.147453	2.57493	0.50691	30905	2425	28480	FALSE
submucosal	474.1	Acute tonsillitis	respiratory	0.265902	0.400812	1.30461	0.594706	2.86192	0.507069	21256	1459	19797	FALSE
submucosal	569.2	Gastrointestinal complications	digestive	0.0878175	0.132424	1.09179	0.842204	1.41534	0.50723	26865	1973	24892	FALSE
submucosal	513.32	Orthopnea	respiratory	-0.396737	0.600229	0.672511	0.207383	2.18084	0.508628	30181	2347	27834	FALSE
submucosal	355.1	Chronic pain syndrome	neurological	0.105612	0.160379	1.11139	0.811615	1.52189	0.510205	28127	2162	25965	FALSE
submucosal	290.1	Dementias	mental disorders	-0.186152	0.28271	0.830147	0.476988	1.44478	0.510245	29016	2238	26778	FALSE
submucosal	204.1	Lymphoid leukemia	neoplasms	-0.34062	0.518031	0.711329	0.2577	1.96348	0.510841	30394	2364	28030	FALSE
submucosal	526.9	Jaw disease NOS	digestive	-0.675449	1.02828	0.508928	0.067822	3.81893	0.511261	28327	2163	26164	FALSE
submucosal	509.3	Pulmonary insufficiency or respiratory failure following trauma and surgery	respiratory	-0.21607	0.329612	0.805679	0.42227	1.53721	0.512129	27344	2082	25262	FALSE
submucosal	360.2	Progressive myopia	sense organs	0.312915	0.478066	1.36741	0.535746	3.49008	0.512762	28797	2217	26580	FALSE
submucosal	733.8	Malunion and nonunion of fracture	musculoskeletal	0.230128	0.352587	1.25876	0.630689	2.5123	0.51396	25832	1902	23930	FALSE
submucosal	433	Cerebrovascular disease	circulatory system	0.067727	0.103904	1.07007	0.872909	1.31177	0.514514	30443	2370	28073	FALSE
submucosal	297.2	Suicide or self-inflicted injury	mental disorders	0.308808	0.474614	1.3618	0.537172	3.45234	0.515272	20133	1382	18751	FALSE
submucosal	212	Benign neoplasm of respiratory and intrathoracic organs	neoplasms	-0.388701	0.598356	0.677937	0.209826	2.19038	0.51594	31127	2438	28689	FALSE
submucosal	696.4	Psoriasis	dermatologic	0.134406	0.207531	1.14386	0.761585	1.71801	0.517214	25804	1854	23950	FALSE
submucosal	596.5	Functional disorders of bladder	genitourinary	0.126157	0.194917	1.13446	0.774235	1.66228	0.51748	28973	2230	26743	FALSE
submucosal	729.3	Panniculitis	musculoskeletal	0.281054	0.434403	1.32452	0.565313	3.10335	0.517639	23052	1581	21471	FALSE
submucosal	374.1	Ectropion or entropion	sense organs	0.344768	0.534876	1.41166	0.494806	4.02742	0.519202	26279	1971	24308	FALSE
submucosal	428.3	Heart failure with reduced EF [Systolic or combined heart failure]	circulatory system	0.104788	0.16291	1.11047	0.806932	1.5282	0.520078	29162	2246	26916	FALSE
submucosal	327.72	Sleep related leg cramps	neurological	-0.655363	1.0239	0.519254	0.0697941	3.86314	0.52213	24982	1801	23181	FALSE
submucosal	315.1	Learning disorder	mental disorders	0.703752	1.10466	2.02132	0.231917	17.6172	0.524074	30198	2349	27849	FALSE
submucosal	535.2	Atrophic gastritis	digestive	0.141284	0.222042	1.15175	0.745338	1.77977	0.524583	28220	2143	26077	FALSE
submucosal	749.1	Cleft palate	congenital anomalies	0.679749	1.07077	1.97338	0.241967	16.0941	0.525543	28240	2185	26055	FALSE
submucosal	496.21	Obstructive chronic bronchitis	respiratory	0.152612	0.241148	1.16487	0.726122	1.86873	0.526828	25819	1910	23909	FALSE
submucosal	250.24	Type 2 diabetes with neurological manifestations	endocrine/metabolic	0.08459	0.133673	1.08827	0.837437	1.41424	0.526856	26248	1983	24265	FALSE
submucosal	1008	Crushing or internal injury to organs	NULL	-0.190369	0.301364	0.826654	0.457928	1.49228	0.527589	31189	2445	28744	FALSE
submucosal	851	Complications of transplants and reattached limbs	injuries & poisonings	0.173266	0.27509	1.18918	0.693564	2.03897	0.528792	29595	2286	27309	FALSE
submucosal	930	Allergic reaction to food	injuries & poisonings	-0.644459	1.0238	0.524947	0.070573	3.90474	0.529037	25675	1837	23838	FALSE
submucosal	441	Vascular insufficiency of intestine	circulatory system	-0.266739	0.425022	0.765873	0.332944	1.76174	0.530274	28768	2216	26552	FALSE
submucosal	580.11	Proliferative glomerulonephritis	genitourinary	-0.64596	1.03123	0.524159	0.069449	3.95603	0.531052	26745	2044	24701	FALSE
submucosal	994.1	Systemic inflammatory response syndrome (SIRS)	injuries & poisonings	-0.19645	0.314832	0.821642	0.443295	1.52291	0.532638	30049	2348	27701	FALSE
submucosal	287.32	Secondary thrombocytopenia	hematopoietic	0.198857	0.318953	1.22001	0.652927	2.27961	0.532977	28329	2160	26169	FALSE
submucosal	426.31	Right bundle branch block	circulatory system	-0.322796	0.51875	0.724121	0.261965	2.00161	0.533772	23524	1723	21801	FALSE
submucosal	446.5	Giant cell arteritis	circulatory system	0.476003	0.765942	1.60963	0.358709	7.22285	0.534296	28693	2212	26481	FALSE
submucosal	800.3	Fracture of tibia and fibula	injuries & poisonings	-0.145765	0.235353	0.864361	0.544952	1.37098	0.535688	28513	2205	26308	FALSE
submucosal	429.3	Symptoms involving cardiovascular system	circulatory system	0.111857	0.180798	1.11835	0.784658	1.59396	0.536123	29090	2237	26853	FALSE
submucosal	618.6	Vaginal enterocele, congenital or acquired	genitourinary	0.246424	0.399008	1.27944	0.5853	2.79681	0.536844	29581	2288	27293	FALSE
submucosal	772.2	Spasm of muscle	symptoms	0.0797092	0.12916	1.08297	0.840763	1.39496	0.537147	27311	2052	25259	FALSE
submucosal	588	Disorders resulting from impaired renal function	genitourinary	-0.116707	0.189126	0.889846	0.614225	1.28914	0.537177	27092	2075	25017	FALSE
submucosal	522	Diseases of pulp and periapical tissues	digestive	0.160819	0.260785	1.17447	0.704463	1.95807	0.537452	28456	2179	26277	FALSE
submucosal	500.1	Extrinsic allergic alveolitis	respiratory	0.660235	1.07075	1.93525	0.237297	15.7827	0.537494	27205	2073	25132	FALSE
submucosal	535.8	Other specified gastritis	digestive	0.175768	0.285337	1.19216	0.681477	2.08554	0.537893	28116	2134	25982	FALSE
submucosal	710.12	Chronic osteomyelitis	musculoskeletal	-0.367226	0.600607	0.692653	0.213437	2.24783	0.540918	28288	2169	26119	FALSE
submucosal	853	Complication of colostomy or enterostomy	injuries & poisonings	-0.363262	0.595868	0.695404	0.216284	2.23589	0.542104	29505	2274	27231	FALSE
submucosal	270.33	Amyloidosis	endocrine/metabolic	0.37748	0.619446	1.4586	0.433166	4.91157	0.54227	29938	2310	27628	FALSE
submucosal	368.1	Amblyopia	sense organs	-0.363636	0.598975	0.695144	0.214891	2.2487	0.543786	28811	2209	26602	FALSE
submucosal	528.41	Cyst of the salivary gland	digestive	0.654003	1.08202	1.92322	0.230675	16.0347	0.545558	29401	2285	27116	FALSE
submucosal	145	Cancer of mouth	neoplasms	-0.439386	0.727752	0.644432	0.154775	2.6832	0.546005	30961	2425	28536	FALSE
submucosal	279.2	Autoimmune disease NEC	endocrine/metabolic	0.663661	1.1013	1.94189	0.224273	16.8141	0.546765	29390	2267	27123	FALSE
submucosal	415.2	Chronic pulmonary heart disease	circulatory system	0.128754	0.214539	1.13741	0.74696	1.73195	0.548413	29257	2253	27004	FALSE
submucosal	370	Keratitis	sense organs	0.100681	0.168143	1.10592	0.795424	1.53763	0.549318	26689	2008	24681	FALSE
submucosal	333.2	Myoclonus	neurological	-0.435803	0.729026	0.646745	0.154944	2.69956	0.549982	27619	2118	25501	FALSE
submucosal	913	Toxic effect of venom	injuries & poisonings	-0.357316	0.598153	0.699551	0.216602	2.25932	0.550263	30102	2335	27767	FALSE
submucosal	512.1	Wheezing	respiratory	0.0919236	0.153979	1.09628	0.810685	1.48249	0.550516	19980	1356	18624	FALSE
submucosal	579.2	Splenomegaly	digestive	-0.17158	0.288037	0.842333	0.478962	1.48138	0.551384	25168	1797	23371	FALSE
submucosal	754	Congenital musculoskeletal deformities of spine	congenital anomalies	0.319089	0.535829	1.37587	0.481362	3.93265	0.551506	30686	2400	28286	FALSE
submucosal	371.9	Chronic inflammatory disorders of orbit	sense organs	0.657615	1.10445	1.93018	0.221549	16.8162	0.551561	26250	1968	24282	FALSE
submucosal	695.21	Dermatitis herpetiformis	dermatologic	0.632186	1.0622	1.88172	0.234634	15.091	0.551732	25955	1871	24084	FALSE
submucosal	586.4	Stricture/obstruction of ureter	genitourinary	-0.195886	0.329301	0.822106	0.431143	1.5676	0.551941	26877	2053	24824	FALSE
submucosal	365.11	Primary open angle glaucoma	sense organs	-0.207445	0.350563	0.812658	0.408792	1.61552	0.554019	28871	2221	26650	FALSE
submucosal	509.1	Respiratory failure	respiratory	-0.076738	0.129782	0.926132	0.718125	1.19439	0.554331	28045	2141	25904	FALSE
submucosal	495.11	Chronic obstructive asthma with exacerbation	respiratory	0.372681	0.632846	1.45162	0.419918	5.01814	0.55593	25648	1893	23755	FALSE
submucosal	592.13	Chronic interstitial cystitis	genitourinary	0.1657	0.28177	1.18022	0.679384	2.05026	0.556487	22769	1654	21115	FALSE
submucosal	367.9	Blindness and low vision	sense organs	0.135978	0.232196	1.14566	0.726784	1.80594	0.558133	28190	2116	26074	FALSE
submucosal	537.1	Lesions of stomach and duodenum	digestive	-0.600682	1.02645	0.548437	0.0733492	4.10071	0.558411	28005	2121	25884	FALSE
submucosal	686.1	Carbuncle and furuncle	dermatologic	0.140174	0.240095	1.15047	0.718627	1.84183	0.559336	26546	2015	24531	FALSE
submucosal	963	Poisoning by primarily systemic agents	injuries & poisonings	-0.300458	0.517034	0.740479	0.268785	2.03996	0.561161	30325	2350	27975	FALSE
submucosal	535.9	Gastritis and duodenitis, NOS	digestive	0.164887	0.284708	1.17926	0.674934	2.06043	0.562491	28120	2134	25986	FALSE
submucosal	556.1	Ulceration of intestine	digestive	0.203847	0.353669	1.22611	0.613029	2.45233	0.564359	22673	1648	21025	FALSE
submucosal	942	Infusion and transfusion reaction	injuries & poisonings	0.352988	0.613724	1.42331	0.427453	4.73929	0.565184	25680	1839	23841	FALSE
submucosal	170.1	Bone cancer	neoplasms	-0.342701	0.5966	0.70985	0.220461	2.28561	0.565681	30984	2425	28559	FALSE
submucosal	411.41	Aneurysm and dissection of heart	circulatory system	0.306903	0.535996	1.35921	0.475376	3.88629	0.566925	28221	2160	26061	FALSE
submucosal	519.1	Tracheostomy complications	respiratory	-0.58832	1.03272	0.555259	0.0733543	4.20307	0.568896	29145	2205	26940	FALSE
submucosal	751.22	Other specified congenital anomalies of kidney	congenital anomalies	-0.339214	0.596743	0.71233	0.221169	2.29424	0.569734	29895	2336	27559	FALSE
submucosal	526.41	Temporomandibular joint disorder, unspecified	digestive	0.174063	0.306503	1.19013	0.65267	2.17018	0.570103	28429	2174	26255	FALSE
submucosal	356	Hereditary and idiopathic peripheral neuropathy	neurological	-0.117365	0.207256	0.88926	0.592392	1.3349	0.571203	29412	2262	27150	FALSE
submucosal	687.3	Changes in skin texture	dermatologic	0.198271	0.352339	1.21929	0.611211	2.43234	0.573619	24070	1713	22357	FALSE
submucosal	290.11	Alzheimer's disease	mental disorders	-0.262766	0.46696	0.768922	0.307892	1.92029	0.573628	28900	2229	26671	FALSE
submucosal	524.3	Anomalies of tooth position/malocclusion	digestive	0.160129	0.2848	1.17366	0.671608	2.05102	0.573946	28443	2176	26267	FALSE
submucosal	279.1	Immunity deficiency	endocrine/metabolic	0.0703653	0.12525	1.0729	0.839353	1.37143	0.574251	30194	2341	27853	FALSE
submucosal	312.3	Impulse control disorder	mental disorders	0.426797	0.75986	1.53234	0.345581	6.79456	0.574335	30208	2350	27858	FALSE
submucosal	458.2	Iatrogenic hypotension	circulatory system	0.244247	0.435277	1.27666	0.543951	2.99634	0.574709	28605	2229	26376	FALSE
submucosal	362.9	Retinal edema	sense organs	-0.236967	0.427132	0.789017	0.341589	1.8225	0.57904	28704	2207	26497	FALSE
submucosal	513	Respiratory abnormalities	respiratory	0.095257	0.171748	1.09994	0.785551	1.54016	0.579146	30530	2383	28147	FALSE
submucosal	577.2	Chronic pancreatitis	digestive	-0.217539	0.394587	0.804496	0.371232	1.74342	0.581422	30574	2399	28175	FALSE
submucosal	740.12	Osteoarthrosis, localized, secondary	musculoskeletal	0.168939	0.307374	1.18405	0.648227	2.16278	0.582579	25176	1841	23335	FALSE
submucosal	871.4	Open wound of toe(s)	injuries & poisonings	0.341837	0.622093	1.40753	0.415835	4.76425	0.582666	28632	2193	26439	FALSE
submucosal	425	Cardiomyopathy	circulatory system	-0.0970201	0.177199	0.907538	0.641254	1.2844	0.584021	30474	2375	28099	FALSE
submucosal	938.1	Acute dermatitis due to solar radiation	dermatologic	0.579303	1.07774	1.78479	0.215874	14.7563	0.59091	25659	1837	23822	FALSE
submucosal	38.2	Gram positive septicemia	infectious diseases	0.171389	0.321475	1.18695	0.632103	2.22884	0.593942	26741	2018	24723	FALSE
submucosal	751	Genitourinary congenital anomalies	congenital anomalies	-0.113904	0.213701	0.892343	0.586983	1.35656	0.594029	30184	2357	27827	FALSE
submucosal	38	Septicemia	infectious diseases	0.0616699	0.11571	1.06361	0.847791	1.33437	0.594055	27624	2095	25529	FALSE
submucosal	90.3	Venereal diseases due to Chlamydia trachomatis	infectious diseases	0.410022	0.770398	1.50685	0.332885	6.82097	0.594573	30847	2404	28443	FALSE
submucosal	362.6	Peripheral retinal degenerations	sense organs	-0.225363	0.425983	0.798226	0.346356	1.83963	0.596776	28708	2207	26501	FALSE
submucosal	428	Congestive heart failure; nonhypertensive	circulatory system	-0.0599426	0.113778	0.941819	0.753559	1.17711	0.598305	29815	2295	27520	FALSE
submucosal	442.8	Aneurysm of other specified artery	circulatory system	0.196336	0.374401	1.21694	0.584213	2.53492	0.6	28762	2218	26544	FALSE
submucosal	53	Herpes zoster	infectious diseases	-0.108088	0.207254	0.897548	0.597915	1.34734	0.602001	25172	1836	23336	FALSE
submucosal	270.21	Disorders of urea cycle metabolism	endocrine/metabolic	0.563416	1.08623	1.75666	0.208963	14.7675	0.603978	29920	2308	27612	FALSE
submucosal	958.2	Traumatic and surgical subcutaneous emphysema	injuries & poisonings	0.552044	1.06484	1.7368	0.215447	14.001	0.604159	31029	2433	28596	FALSE
submucosal	427.1	Paroxysmal tachycardia, unspecified	circulatory system	0.0800979	0.155417	1.08339	0.798901	1.4692	0.606291	24011	1767	22244	FALSE
submucosal	174.3	Neoplasm of uncertain behavior of breast	neoplasms	0.180717	0.35127	1.19808	0.601834	2.38502	0.606926	24387	1693	22694	FALSE
submucosal	377.1	Optic atrophy	sense organs	-0.239334	0.466195	0.787152	0.315664	1.96287	0.607688	27348	2061	25287	FALSE
submucosal	857	Mechanical complication of unspecified genitourinary device, implant, and graft	injuries & poisonings	-0.307279	0.599305	0.735445	0.227202	2.38061	0.608143	29498	2274	27224	FALSE
submucosal	250.13	Type 1 diabetes with ophthalmic manifestations	endocrine/metabolic	0.20579	0.402161	1.22849	0.558531	2.70209	0.608854	25627	1922	23705	FALSE
submucosal	289.8	Polycythemia, secondary	hematopoietic	0.170122	0.333984	1.18545	0.616013	2.28127	0.610492	25757	1867	23890	FALSE
submucosal	70.2	Viral hepatitis B	infectious diseases	-0.201912	0.396627	0.817167	0.375573	1.77798	0.610701	24905	1817	23088	FALSE
submucosal	426	Cardiac conduction disorders	circulatory system	0.0751353	0.147652	1.07803	0.807136	1.43984	0.610845	24070	1773	22297	FALSE
submucosal	195.1	Malignant neoplasm, other	neoplasms	0.112121	0.220984	1.11865	0.725418	1.72504	0.611895	28400	2175	26225	FALSE
submucosal	342	Hemiplegia	neurological	-0.167721	0.331305	0.845589	0.44172	1.61872	0.612686	27713	2126	25587	FALSE
submucosal	747.13	Congenital anomalies of great vessels	congenital anomalies	-0.302527	0.598345	0.738949	0.228714	2.38746	0.613133	30513	2376	28137	FALSE
submucosal	362	Other retinal disorders	sense organs	-0.0703126	0.139596	0.932102	0.708985	1.22544	0.614482	29350	2261	27089	FALSE
submucosal	686.2	Impetigo	dermatologic	-0.366293	0.729056	0.6933	0.166087	2.89405	0.615372	26399	1997	24402	FALSE
submucosal	442.1	Aortic aneurysm	circulatory system	0.154462	0.308214	1.16703	0.63786	2.1352	0.616264	28797	2222	26575	FALSE
submucosal	610.2	Fibroadenosis of breast	genitourinary	-0.230672	0.462271	0.794	0.320869	1.96478	0.617782	23855	1583	22272	FALSE
submucosal	359.2	Myopathy	neurological	-0.150966	0.302817	0.859877	0.474978	1.55668	0.618104	29231	2248	26983	FALSE
submucosal	550	Abdominal hernia	digestive	0.0449223	0.0901204	1.04595	0.876592	1.24802	0.618153	29902	2324	27578	FALSE
submucosal	366.3	Traumatic cataract	sense organs	0.537575	1.08554	1.71185	0.203907	14.3714	0.62045	28401	2171	26230	FALSE
submucosal	526.4	Temporomandibular joint disorders	digestive	0.127335	0.257504	1.1358	0.68566	1.88145	0.620955	28486	2179	26307	FALSE
submucosal	751.1	Congenital anomalies of genital organs	congenital anomalies	-0.171073	0.346329	0.84276	0.427467	1.66152	0.621333	29987	2342	27645	FALSE
submucosal	446.8	Thrombotic microangiopathy	circulatory system	-0.510488	1.03641	0.600202	0.0787204	4.57623	0.622328	28694	2211	26483	FALSE
submucosal	755.6	Other congenital anomalies of lower limb, including pelvic girdle	congenital anomalies	0.300937	0.612555	1.35112	0.406704	4.48862	0.623227	30681	2399	28282	FALSE
submucosal	189.1	Cancer of kidney and renal pelvis	neoplasms	0.144376	0.29393	1.15532	0.649387	2.05542	0.62329	31004	2429	28575	FALSE
submucosal	150	Cancer of esophagus	neoplasms	0.532803	1.09009	1.7037	0.201135	14.4311	0.625006	29523	2269	27254	FALSE
submucosal	522.5	Periapical abscess	digestive	0.135155	0.277089	1.14471	0.665019	1.97042	0.625715	28441	2177	26264	FALSE
submucosal	285.8	Hemoglobinuria	hematopoietic	0.518824	1.06399	1.68005	0.208753	13.5211	0.62582	21032	1205	19827	FALSE
submucosal	754.2	Spondylolisthesis, congenital	congenital anomalies	-0.505313	1.03655	0.603316	0.0791078	4.6012	0.625906	30668	2397	28271	FALSE
submucosal	430.1	Subarachnoid hemorrhage	circulatory system	-0.226192	0.465228	0.797565	0.320447	1.98507	0.626828	29279	2261	27018	FALSE
submucosal	349	Other and unspecified disorders of the nervous system	neurological	0.163525	0.336637	1.17765	0.608789	2.27808	0.627138	27680	2126	25554	FALSE
submucosal	151	Cancer of stomach	neoplasms	-0.354552	0.732759	0.701488	0.166833	2.94956	0.628487	29549	2270	27279	FALSE
submucosal	496	Chronic airway obstruction	respiratory	0.0631305	0.130856	1.06517	0.824196	1.37659	0.629491	26415	1960	24455	FALSE
submucosal	743.9	Osteopenia or other disorder of bone and cartilage	musculoskeletal	0.061681	0.12793	1.06362	0.827735	1.36673	0.629702	29120	2267	26853	FALSE
submucosal	295.3	Psychosis	mental disorders	-0.178206	0.369663	0.83677	0.405455	1.72691	0.629751	20196	1385	18811	FALSE
submucosal	598	Abnormal findings on examination of urine	genitourinary	-0.204804	0.424991	0.814807	0.354238	1.8742	0.629876	31013	2430	28583	FALSE
submucosal	333.4	Torsion dystonia	neurological	0.153462	0.318516	1.16586	0.624484	2.17658	0.629946	27705	2127	25578	FALSE
submucosal	728.71	Contracture of palmar fascia [Dupuytren's disease]	musculoskeletal	-0.349473	0.725371	0.70506	0.170129	2.92196	0.629959	23037	1577	21460	FALSE
submucosal	323.2	Acute (transverse) myelitis	neurological	-0.496894	1.03217	0.608418	0.0804643	4.60045	0.630226	30887	2424	28463	FALSE
submucosal	379.5	Disorders of iris and ciliary body	sense organs	-0.2498	0.520408	0.778956	0.280888	2.1602	0.631222	27336	2060	25276	FALSE
submucosal	550.4	Umbilical hernia	digestive	-0.101127	0.210971	0.903818	0.597721	1.36667	0.631698	28491	2199	26292	FALSE
submucosal	255.2	Adrenal hypofunction	endocrine/metabolic	-0.150128	0.313772	0.860598	0.465277	1.5918	0.632321	27297	2012	25285	FALSE
submucosal	530.5	Disorders of esophageal motility	digestive	0.151977	0.318858	1.16413	0.62314	2.1748	0.633627	22892	1600	21292	FALSE
submucosal	312	Conduct disorders	mental disorders	0.226388	0.476213	1.25406	0.493127	3.18919	0.634507	30238	2353	27885	FALSE
submucosal	753.1	Congenital cataract and lens anomalies	congenital anomalies	0.516651	1.0894	1.6764	0.198181	14.1806	0.635321	30800	2413	28387	FALSE
submucosal	303.1	Dissociative disorder	mental disorders	-0.486881	1.02679	0.61454	0.082135	4.59804	0.635374	20103	1378	18725	FALSE
submucosal	250.15	Diabetes type 1 with peripheral circulatory disorders	endocrine/metabolic	-0.491687	1.03795	0.611594	0.079973	4.67716	0.635706	25575	1916	23659	FALSE
submucosal	732.7	Osteochondritis dissecans	musculoskeletal	-0.485927	1.03043	0.615127	0.0816293	4.63535	0.637228	25754	1894	23860	FALSE
submucosal	743.2	Pathologic fracture	musculoskeletal	0.120324	0.256347	1.12786	0.682416	1.86408	0.638798	28461	2210	26251	FALSE
submucosal	750.2	Lower gastrointestinal congenital anomalies	congenital anomalies	0.137403	0.294205	1.14729	0.644526	2.04224	0.640478	29979	2346	27633	FALSE
submucosal	780	Hypothermia/Chills	symptoms	-0.478066	1.03583	0.619981	0.0814079	4.72162	0.644417	31124	2441	28683	FALSE
submucosal	335	Multiple sclerosis	neurological	0.104236	0.226156	1.10986	0.712461	1.72893	0.644868	27820	2138	25682	FALSE
submucosal	758.1	Chromosomal anomalies	congenital anomalies	-0.336769	0.73237	0.714074	0.169956	3.00019	0.645635	30756	2409	28347	FALSE
submucosal	740.2	Osteoarthrosis, generalized	musculoskeletal	0.068149	0.148465	1.07052	0.800241	1.4321	0.646217	25686	1884	23802	FALSE
submucosal	732.1	Juvenile osteochondrosis	musculoskeletal	-0.472004	1.03215	0.623751	0.0824946	4.71625	0.647455	25753	1894	23859	FALSE
submucosal	291.1	Transient mental disorders due to conditions classified elsewhere	mental disorders	-0.468835	1.03715	0.625731	0.0819497	4.7778	0.651239	28839	2225	26614	FALSE
submucosal	770	Myalgia and myositis unspecified	symptoms	0.0448852	0.0995605	1.04591	0.86049	1.27128	0.65211	30091	2334	27757	FALSE
submucosal	41	Bacterial infection NOS	infectious diseases	0.038088	0.0848019	1.03882	0.879744	1.22667	0.65333	28534	2179	26355	FALSE
submucosal	189.4	Malignant neoplasm of other urinary organs	neoplasms	0.276528	0.616372	1.31854	0.393938	4.41328	0.653693	30892	2419	28473	FALSE
submucosal	443.8	Other specified peripheral vascular diseases	circulatory system	0.339956	0.758354	1.40489	0.317773	6.21105	0.65395	28695	2212	26483	FALSE
submucosal	859	Complication due to other implant and internal device	injuries & poisonings	0.131767	0.294272	1.14084	0.640821	2.03102	0.654317	29586	2284	27302	FALSE
submucosal	353.1	Nerve plexus lesions	neurological	-0.230734	0.516998	0.79395	0.288215	2.18711	0.655383	27725	2121	25604	FALSE
submucosal	225	Benign neoplasm of brain and other parts of nervous system	neoplasms	0.119997	0.27256	1.12749	0.660856	1.92363	0.659749	30816	2409	28407	FALSE
submucosal	530.12	Ulcer of esophagus	digestive	0.26955	0.612995	1.30938	0.393797	4.35368	0.660135	22797	1592	21205	FALSE
submucosal	149	Cancer of larynx, pharynx, nasal cavities	neoplasms	-0.31872	0.731577	0.727079	0.173321	3.05009	0.663082	30956	2425	28531	FALSE
submucosal	194	Cancer of other endocrine glands	neoplasms	0.325294	0.748141	1.38444	0.319479	5.99935	0.663705	30362	2351	28011	FALSE
submucosal	270	Disorders of protein plasma/amino-acid transport and metabolism	endocrine/metabolic	-0.0998845	0.230164	0.904942	0.57637	1.42082	0.664309	30178	2328	27850	FALSE
submucosal	573.5	Jaundice (not of newborn)	digestive	-0.150864	0.34783	0.859965	0.434912	1.70043	0.664485	26620	2021	24599	FALSE
submucosal	159	Malignant neoplasm of other and ill-defined sites within the digestive organs and peritoneum	neoplasms	0.143846	0.332424	1.15471	0.601875	2.21532	0.66522	29641	2278	27363	FALSE
submucosal	681.2	Cellulitis and abscess of face/neck	dermatologic	0.105806	0.245396	1.11161	0.687172	1.79819	0.666348	26549	2014	24535	FALSE
submucosal	427.12	Paroxysmal ventricular tachycardia	circulatory system	0.122554	0.284364	1.13038	0.647394	1.9737	0.666487	23607	1733	21874	FALSE
submucosal	41.2	Streptococcus infection	infectious diseases	-0.0926368	0.215015	0.911525	0.598059	1.38929	0.666586	26947	2031	24916	FALSE
submucosal	317.1	Alcoholism	mental disorders	-0.0966558	0.225214	0.907868	0.583871	1.41166	0.667798	27664	2144	25520	FALSE
submucosal	381.3	Mastoiditis & related conditions	sense organs	-0.437568	1.02645	0.645605	0.086345	4.82721	0.669894	26247	1952	24295	FALSE
submucosal	359	Muscular dystrophies and other myopathies	neurological	-0.123903	0.291361	0.883465	0.499089	1.56387	0.670649	29240	2249	26991	FALSE
submucosal	411.2	Myocardial infarction	circulatory system	0.0643287	0.151712	1.06644	0.792132	1.43575	0.671552	28726	2207	26519	FALSE
submucosal	721.2	Spondylosis with myelopathy	musculoskeletal	-0.147874	0.348788	0.862539	0.435396	1.70873	0.67159	25752	1890	23862	FALSE
submucosal	271.9	Other disorders of carbohydrate transport and metabolism	endocrine/metabolic	0.454612	1.07681	1.57556	0.190915	13.0027	0.672889	29297	2183	27114	FALSE
submucosal	365.2	Primary angle-closure glaucoma	sense organs	0.141674	0.337294	1.1522	0.594864	2.23172	0.674463	28852	2222	26630	FALSE
submucosal	283	Acquired hemolytic anemias	hematopoietic	0.218609	0.523225	1.24434	0.446234	3.46992	0.676085	21073	1208	19865	FALSE
submucosal	480.1	Bacterial pneumonia	respiratory	-0.0936491	0.225134	0.910602	0.585721	1.41569	0.677432	25688	1880	23808	FALSE
submucosal	592.2	Urethritis and urethral syndrome	genitourinary	0.311106	0.748552	1.36493	0.314725	5.9196	0.677695	22620	1642	20978	FALSE
submucosal	819	Skull and face fracture and other intercranial injury	injuries & poisonings	-0.130895	0.315328	0.87731	0.472869	1.62767	0.678063	30760	2401	28359	FALSE
submucosal	70	Viral hepatitis	infectious diseases	-0.0872214	0.21145	0.916474	0.605522	1.38711	0.679979	25130	1835	23295	FALSE
submucosal	81.12	Chronic graft-versus-host disease	infectious diseases	-0.421301	1.028	0.656192	0.0874945	4.92132	0.681933	30478	2390	28088	FALSE
submucosal	429.1	Heart transplant/surgery	circulatory system	-0.213614	0.521702	0.80766	0.290501	2.24549	0.682205	28779	2206	26573	FALSE
submucosal	585.4	Chronic kidney disease, Stage I or II	genitourinary	-0.0772071	0.189134	0.925698	0.638962	1.34111	0.683117	27082	2075	25007	FALSE
submucosal	598.9	Other nonspecific findings on examination of urine	genitourinary	-0.173406	0.425385	0.840796	0.365255	1.93547	0.683535	31028	2432	28596	FALSE
submucosal	709.5	Dermatomyositis	dermatologic	-0.298876	0.733707	0.741652	0.176058	3.12424	0.683751	25714	1845	23869	FALSE
submucosal	153.3	Malignant neoplasm of rectum, rectosigmoid junction, and anus	neoplasms	-0.133221	0.329045	0.875271	0.459255	1.66814	0.685571	27270	1979	25291	FALSE
submucosal	350.3	Lack of coordination	neurological	0.0770487	0.190605	1.08009	0.743388	1.56931	0.686041	29687	2296	27391	FALSE
submucosal	302	Sexual and gender identity disorders	mental disorders	0.211846	0.524167	1.23596	0.442408	3.4529	0.686098	20131	1381	18750	FALSE
submucosal	520	Disorders of tooth development	digestive	0.119333	0.29621	1.12675	0.630502	2.01356	0.687046	28432	2175	26257	FALSE
submucosal	362.22	Macular degeneration, wet	sense organs	-0.413667	1.02783	0.661221	0.0881938	4.95742	0.687342	28644	2202	26442	FALSE
submucosal	574	Cholelithiasis and cholecystitis	digestive	0.0420599	0.104849	1.04296	0.849214	1.2809	0.688311	30021	2339	27682	FALSE
submucosal	750.1	Upper gastrointestinal congenital anomalies	congenital anomalies	-0.240008	0.600711	0.786622	0.242343	2.5533	0.689496	29888	2336	27552	FALSE
submucosal	504	Other alveolar and parietoalveolar pneumonopathy	respiratory	0.11781	0.295639	1.12503	0.630247	2.00825	0.690268	27326	2085	25241	FALSE
submucosal	389.5	Disorders of acoustic nerve	sense organs	-0.408135	1.03105	0.664889	0.0881255	5.01645	0.69222	28371	2182	26189	FALSE
submucosal	526.1	Cysts of the jaws	digestive	-0.405603	1.03363	0.666575	0.0879028	5.05469	0.694759	28324	2163	26161	FALSE
submucosal	447	Other disorders of arteries and arterioles	circulatory system	-0.0770741	0.197209	0.925821	0.629013	1.36268	0.695926	29041	2239	26802	FALSE
submucosal	527.7	Disturbance of salivary secretion	digestive	-0.154067	0.394997	0.857214	0.395241	1.85916	0.696502	29489	2291	27198	FALSE
submucosal	695.81	Erythema nodosum	dermatologic	-0.285577	0.733432	0.75158	0.178511	3.16436	0.697002	25978	1872	24106	FALSE
submucosal	253.11	Acromegaly and gigantism	endocrine/metabolic	0.409461	1.05525	1.50601	0.190364	11.9143	0.697998	27139	2002	25137	FALSE
submucosal	292.11	Aphasia	mental disorders	0.122695	0.318966	1.13054	0.605029	2.11249	0.700486	28943	2235	26708	FALSE
submucosal	430.2	Intracerebral hemorrhage	circulatory system	0.136053	0.353951	1.14574	0.572529	2.29285	0.700695	29299	2265	27034	FALSE
submucosal	131	Protozoan infection	infectious diseases	-0.0900541	0.234373	0.913882	0.577281	1.44675	0.700805	30225	2341	27884	FALSE
submucosal	242.3	Exophthalmos	endocrine/metabolic	-0.200371	0.522053	0.818427	0.294171	2.27699	0.701117	24963	1844	23119	FALSE
submucosal	695.2	Bullous dermatoses	dermatologic	0.288268	0.751797	1.33411	0.305668	5.82285	0.701395	25965	1872	24093	FALSE
submucosal	751.11	Congenital anomalies of female genital organs	congenital anomalies	-0.132879	0.346811	0.875571	0.44369	1.72784	0.701612	29982	2342	27640	FALSE
submucosal	531.3	Duodenal ulcer	digestive	-0.230643	0.602142	0.794023	0.243938	2.58456	0.701691	30331	2361	27970	FALSE
submucosal	377.3	Optic neuritis/neuropathy	sense organs	0.134775	0.352161	1.14428	0.573808	2.28191	0.701936	27373	2065	25308	FALSE
submucosal	575.6	Cholesterolosis of gallbladder	digestive	0.165339	0.432119	1.17979	0.5058	2.7519	0.701999	28871	2238	26633	FALSE
submucosal	556	Ulceration of the lower GI tract	digestive	0.12704	0.334494	1.13546	0.589448	2.18726	0.704095	22691	1649	21042	FALSE
submucosal	990	Effects radiation NOS	injuries & poisonings	-0.274348	0.732445	0.760067	0.180877	3.1939	0.707984	29861	2331	27530	FALSE
submucosal	588.2	Secondary hyperparathyroidism (of renal origin)	genitourinary	0.0946927	0.253615	1.09932	0.668717	1.8072	0.708872	26892	2061	24831	FALSE
submucosal	287.4	Qualitative platelet defects	hematopoietic	-0.384074	1.02872	0.681081	0.0906841	5.11525	0.708888	28231	2150	26081	FALSE
submucosal	513.8	Disorders of diaphragm	respiratory	-0.224555	0.601886	0.798872	0.245551	2.59904	0.709085	30179	2347	27832	FALSE
submucosal	1006	Crushing injury	NULL	-0.383316	1.02876	0.681598	0.0907471	5.11945	0.709446	31189	2445	28744	FALSE
submucosal	157	Pancreatic cancer	neoplasms	-0.172609	0.464414	0.841467	0.338625	2.091	0.710139	29594	2273	27321	FALSE
submucosal	755.61	Congenital hip dysplasia and deformity	congenital anomalies	0.276458	0.745903	1.31845	0.30559	5.68839	0.710909	30673	2398	28275	FALSE
submucosal	290.13	Senile dementia	mental disorders	0.280554	0.759237	1.32386	0.298928	5.86299	0.71174	28840	2226	26614	FALSE
submucosal	536.3	Gastroparesis	digestive	0.0875718	0.23721	1.09152	0.685669	1.7376	0.711998	28198	2140	26058	FALSE
submucosal	324	Other CNS infection and poliomyelitis	neurological	0.196497	0.533588	1.21713	0.427699	3.46367	0.712682	30906	2427	28479	FALSE
submucosal	255.21	Glucocorticoid deficiency	endocrine/metabolic	-0.11946	0.329203	0.8874	0.465475	1.69177	0.716697	27279	2011	25268	FALSE
submucosal	384.1	Myringitis	sense organs	-0.37241	1.03176	0.689072	0.0912035	5.20616	0.71814	26244	1952	24292	FALSE
submucosal	527	Diseases of the salivary glands	digestive	0.0781834	0.217382	1.08132	0.70618	1.65575	0.719102	29647	2308	27339	FALSE
submucosal	370.3	Keratoconjunctivitis	sense organs	0.0739655	0.205775	1.07677	0.719389	1.61169	0.719259	26547	1994	24553	FALSE
submucosal	200.1	Polycythemia vera	neoplasms	0.189107	0.527751	1.20817	0.429435	3.39906	0.720099	27616	2092	25524	FALSE
submucosal	585.31	Renal dialysis	genitourinary	0.0986971	0.275767	1.10373	0.642875	1.89496	0.720417	26871	2058	24813	FALSE
submucosal	371.3	Inflammation of eyelids	sense organs	0.05609	0.156992	1.05769	0.777544	1.43878	0.720883	26775	2014	24761	FALSE
submucosal	386.21	Central origin vertigo	sense organs	-0.165906	0.465376	0.847126	0.340261	2.10904	0.721467	25872	1878	23994	FALSE
submucosal	420.22	Chronic pericarditis	circulatory system	0.266484	0.749095	1.30537	0.30067	5.66729	0.722034	30062	2341	27721	FALSE
submucosal	401.22	Hypertensive chronic kidney disease	circulatory system	0.0480854	0.135437	1.04926	0.804632	1.36826	0.72256	21726	1533	20193	FALSE
submucosal	348.8	Encephalopathy, not elsewhere classified	neurological	-0.064249	0.1829	0.937771	0.655254	1.3421	0.725379	27988	2150	25838	FALSE
submucosal	368.3	Anisometropia	sense organs	-0.359484	1.03162	0.698036	0.0924149	5.27247	0.727492	28782	2207	26575	FALSE
submucosal	389.2	Conductive hearing loss	sense organs	-0.09105	0.261839	0.912972	0.546481	1.52525	0.728041	28572	2197	26375	FALSE
submucosal	743.22	Pathologic fracture of femur	musculoskeletal	0.210601	0.606001	1.23442	0.376378	4.04857	0.728196	28299	2196	26103	FALSE
submucosal	513.4	Hyperventilation	respiratory	0.111541	0.320985	1.118	0.595955	2.09734	0.728218	30244	2355	27889	FALSE
submucosal	694.1	Vitiligo	dermatologic	0.182141	0.528011	1.19978	0.426237	3.37718	0.730127	25989	1874	24115	FALSE
submucosal	427.21	Atrial fibrillation	circulatory system	0.0479626	0.139506	1.04913	0.798141	1.37905	0.730995	24201	1782	22419	FALSE
submucosal	964.1	Anticoagulants causing adverse effects	injuries & poisonings	0.36326	1.05857	1.43801	0.180588	11.4508	0.731477	30265	2347	27918	FALSE
submucosal	375.2	Epiphora	sense organs	0.128362	0.374832	1.13696	0.54536	2.37034	0.732012	27360	2064	25296	FALSE
submucosal	686.3	Pilonidal cyst	dermatologic	-0.250655	0.739214	0.778291	0.182772	3.31416	0.734548	26388	1997	24391	FALSE
submucosal	575.1	Cholangitis	digestive	0.205095	0.60995	1.22764	0.371425	4.05762	0.736684	28840	2235	26605	FALSE
submucosal	446.9	Arteritis NOS	circulatory system	0.177613	0.530108	1.19436	0.422571	3.37577	0.737587	28718	2214	26504	FALSE
submucosal	429.9	Cardiac complications, not elsewhere classified	circulatory system	0.133904	0.400273	1.14328	0.521716	2.50538	0.737979	28797	2209	26588	FALSE
submucosal	425.2	Secondary/extrinsic cardiomyopathies	circulatory system	0.102691	0.308171	1.10815	0.605728	2.0273	0.738963	30158	2351	27807	FALSE
submucosal	345.1	Epilepsy	neurological	-0.0765802	0.229882	0.926279	0.590285	1.45352	0.739038	27844	2137	25707	FALSE
submucosal	530.6	Diverticulum of esophagus, acquired	digestive	0.354471	1.06488	1.42543	0.176806	11.4919	0.73923	22777	1590	21187	FALSE
submucosal	772.1	Muscular wasting and disuse atrophy	symptoms	-0.199189	0.600552	0.819395	0.252518	2.65885	0.740134	26571	1985	24586	FALSE
submucosal	270.1	Disturbances of amino-acid transport	endocrine/metabolic	0.198472	0.606517	1.21954	0.371465	4.00381	0.743492	29947	2310	27637	FALSE
submucosal	316.1	Polyneuropathy due to drugs	mental disorders	0.0833054	0.256678	1.08687	0.657188	1.7975	0.745521	27590	2139	25451	FALSE
submucosal	717	Polymyalgia Rheumatica	musculoskeletal	-0.194412	0.601278	0.823319	0.253367	2.67538	0.746444	31100	2432	28668	FALSE
submucosal	245.1	Thyroiditis, acute and subacute	endocrine/metabolic	-0.236572	0.734256	0.789329	0.187175	3.32866	0.747306	24940	1842	23098	FALSE
submucosal	250.14	Type 1 diabetes with neurological manifestations	endocrine/metabolic	0.103471	0.321155	1.10901	0.590969	2.08118	0.747314	25669	1926	23743	FALSE
submucosal	172.1	Melanomas of skin, dx or hx	neoplasms	0.0968773	0.302453	1.10173	0.609004	1.99309	0.748737	28251	2163	26088	FALSE
submucosal	172.11	Melanomas of skin	neoplasms	0.0968773	0.302453	1.10173	0.609004	1.99309	0.748737	28251	2163	26088	FALSE
submucosal	791	Gangrene	symptoms	0.127274	0.401174	1.13573	0.517354	2.49322	0.751051	31091	2437	28654	FALSE
submucosal	378.5	Paralytic strabismus	sense organs	-0.190762	0.601325	0.826329	0.25427	2.68541	0.751065	27319	2059	25260	FALSE
submucosal	536.8	Dyspepsia and other specified disorders of function of stomach	digestive	0.0635915	0.201025	1.06566	0.718624	1.58028	0.751747	28290	2148	26142	FALSE
submucosal	426.92	Cardiac defibrillator in situ	circulatory system	0.335775	1.06603	1.39902	0.173141	11.3045	0.75278	23467	1720	21747	FALSE
submucosal	433.6	Acute, but ill-defined cerebrovascular disease	circulatory system	0.105826	0.336986	1.11163	0.574264	2.15183	0.753494	29304	2266	27038	FALSE
submucosal	344	Other paralytic syndromes	neurological	-0.115941	0.371218	0.890528	0.43019	1.84346	0.754792	27681	2124	25557	FALSE
submucosal	729.7	Nontraumatic compartment syndrome	musculoskeletal	0.328257	1.05165	1.38855	0.176759	10.9079	0.754937	23004	1576	21428	FALSE
submucosal	381.9	Otorrhea	sense organs	0.133414	0.429091	1.14272	0.492823	2.64966	0.755859	26296	1957	24339	FALSE
submucosal	715	Other inflammatory spondylopathies	musculoskeletal	0.0573701	0.18546	1.05905	0.736289	1.52329	0.757064	28704	2194	26510	FALSE
submucosal	164	Cancer of intrathoracic organs	neoplasms	0.324831	1.05117	1.3838	0.17632	10.8603	0.757306	30906	2410	28496	FALSE
submucosal	594.2	Calculus of lower urinary tract	genitourinary	0.190135	0.616185	1.20941	0.361466	4.04652	0.75765	29033	2261	26772	FALSE
submucosal	189.12	Malignant neoplasm of renal pelvis	neoplasms	-0.318124	1.03534	0.727512	0.0956175	5.53533	0.758642	30881	2417	28464	FALSE
submucosal	747.1	Cardiac congenital anomalies	congenital anomalies	0.0612705	0.200195	1.06319	0.718124	1.57405	0.759564	30784	2401	28383	FALSE
submucosal	967	Adverse effects of sedatives or other central nervous system depressants and anesthetics	injuries & poisonings	0.161429	0.529291	1.17519	0.416453	3.31626	0.760374	30296	2350	27946	FALSE
submucosal	715.1	Sacroiliitis NEC	musculoskeletal	0.0648606	0.212667	1.06701	0.703304	1.6188	0.760376	28607	2186	26421	FALSE
submucosal	749.2	Congenital anomalies of skull and face bones	congenital anomalies	0.323523	1.06514	1.38199	0.171332	11.1473	0.761328	31034	2430	28604	FALSE
submucosal	110.2	Dermatomycoses	infectious diseases	0.129209	0.429525	1.13793	0.490338	2.64079	0.763552	25929	1867	24062	FALSE
submucosal	189.11	Malignant neoplasm of kidney, except pelvis	neoplasms	0.0912263	0.305117	1.09552	0.602418	1.99223	0.764949	30999	2428	28571	FALSE
submucosal	871.3	Open wound of foot except toe(s) alone	injuries & poisonings	-0.179467	0.60325	0.835715	0.25619	2.72618	0.766084	28648	2193	26455	FALSE
submucosal	227.1	Benign neoplasm of adrenal gland	neoplasms	0.110943	0.374863	1.11733	0.53591	2.32955	0.767264	30425	2357	28068	FALSE
submucosal	252.2	Hypoparathyroidism	endocrine/metabolic	0.127646	0.431744	1.13615	0.487448	2.64816	0.767496	27193	2007	25186	FALSE
submucosal	722.7	Intervertebral disc disorder with myelopathy	musculoskeletal	0.127581	0.431822	1.13608	0.487341	2.64839	0.767652	25690	1887	23803	FALSE
submucosal	345	Epilepsy, recurrent seizures, convulsions	neurological	-0.0402511	0.136793	0.960548	0.734647	1.25591	0.768568	28316	2177	26139	FALSE
submucosal	507	Pleurisy; pleural effusion	respiratory	0.0333698	0.113642	1.03393	0.827482	1.29189	0.769033	28269	2164	26105	FALSE
submucosal	733.6	Costochondritis	musculoskeletal	-0.116725	0.397582	0.889829	0.408205	1.9397	0.769072	25821	1900	23921	FALSE
submucosal	250.25	Diabetes type 2 with peripheral circulatory disorders	endocrine/metabolic	-0.075755	0.258842	0.927043	0.558173	1.53968	0.769775	25749	1932	23817	FALSE
submucosal	742.1	Loose body in joint	musculoskeletal	0.217973	0.747072	1.24355	0.28757	5.37756	0.770463	26787	1951	24836	FALSE
submucosal	681.6	Cellulitis and abscess of foot, toe	dermatologic	-0.137049	0.471385	0.871927	0.346122	2.1965	0.771252	26420	2000	24420	FALSE
submucosal	870.1	Open wound or laceration of eye or eyelid	injuries & poisonings	-0.298377	1.03156	0.742021	0.0982498	5.60404	0.772392	28626	2191	26435	FALSE
submucosal	386.1	Meniere's disease	sense organs	-0.113446	0.393334	0.892752	0.412969	1.92994	0.773024	25903	1880	24023	FALSE
submucosal	428.1	Congestive heart failure (CHF) NOS	circulatory system	0.0394292	0.13702	1.04022	0.795225	1.36069	0.773529	29399	2265	27134	FALSE
submucosal	130.1	Lyme disease	infectious diseases	0.303051	1.05728	1.35398	0.170468	10.7544	0.774393	30035	2321	27714	FALSE
submucosal	797	Shock	symptoms	0.0594547	0.208308	1.06126	0.705514	1.59638	0.775324	30963	2429	28534	FALSE
submucosal	327.6	Circadian rhythm sleep disorder	neurological	0.149783	0.526752	1.16158	0.413685	3.26159	0.77614	25002	1804	23198	FALSE
submucosal	291	Other specified nonpsychotic and/or transient mental disorders	mental disorders	-0.0651734	0.230216	0.936905	0.596667	1.47116	0.777102	29078	2245	26833	FALSE
submucosal	597.8	Urethral hypermobility/ISD	genitourinary	-0.206945	0.732803	0.813064	0.193353	3.419	0.777635	28687	2202	26485	FALSE
submucosal	458	Hypotension	circulatory system	0.0306014	0.1087	1.03107	0.833227	1.2759	0.77831	29697	2323	27374	FALSE
submucosal	571.8	Liver abscess and sequelae of chronic liver disease	digestive	-0.0715087	0.254525	0.930988	0.565312	1.53321	0.778749	26722	2029	24693	FALSE
submucosal	226	Benign neoplasm of thyroid glands	neoplasms	0.12147	0.433012	1.12916	0.483245	2.6384	0.779075	30403	2355	28048	FALSE
submucosal	433.12	Cerebral atherosclerosis	circulatory system	-0.168593	0.604033	0.844852	0.258593	2.76022	0.780158	29246	2259	26987	FALSE
submucosal	743	Osteoporosis, osteopenia and pathological fracture	musculoskeletal	0.0250891	0.0901449	1.02541	0.859336	1.22357	0.780767	30225	2355	27870	FALSE
submucosal	870	Open wounds of head; neck; and trunk	injuries & poisonings	-0.0536707	0.193021	0.947744	0.649215	1.38355	0.780969	28980	2220	26760	FALSE
submucosal	360	Disorders of the globe	sense organs	-0.130032	0.46785	0.878067	0.350983	2.1967	0.781062	28818	2217	26601	FALSE
submucosal	282.5	Sickle cell anemia	hematopoietic	-0.0783598	0.282483	0.924632	0.531514	1.60851	0.781476	21237	1218	20019	FALSE
submucosal	696.42	Psoriatic arthropathy	dermatologic	-0.116398	0.422859	0.890121	0.388601	2.03889	0.783112	25579	1834	23745	FALSE
submucosal	361.2	Retinoschisis and retinal cysts	sense organs	0.288503	1.0553	1.33443	0.168658	10.558	0.784557	28763	2213	26550	FALSE
submucosal	191.1	Cancer of brain and nervous system	neoplasms	-0.126471	0.465175	0.881199	0.354086	2.193	0.785715	30720	2399	28321	FALSE
submucosal	337.1	Peripheral autonomic neuropathy	neurological	-0.200731	0.74001	0.818133	0.191829	3.48926	0.786196	27608	2118	25490	FALSE
submucosal	292.1	Aphasia/speech disturbance	mental disorders	0.0469685	0.175689	1.04809	0.742761	1.47893	0.789208	29234	2261	26973	FALSE
submucosal	345.3	Convulsions	neurological	-0.0423424	0.158605	0.958542	0.702431	1.30803	0.789494	28119	2161	25958	FALSE
submucosal	480.12	Pseudomonal pneumonia	respiratory	0.162571	0.610664	1.17653	0.355464	3.89414	0.79007	25437	1861	23576	FALSE
submucosal	440	Atherosclerosis	circulatory system	0.0450549	0.169378	1.04609	0.750568	1.45796	0.790237	29126	2251	26875	FALSE
submucosal	41.9	Infection with drug-resistant microorganisms	infectious diseases	-0.0721567	0.272276	0.930385	0.545628	1.58646	0.791	26818	2022	24796	FALSE
submucosal	395.2	Nonrheumatic aortic valve disorders	circulatory system	0.0483095	0.184127	1.0495	0.731557	1.50561	0.793036	29227	2245	26982	FALSE
submucosal	695.42	Systemic lupus erythematosus	dermatologic	0.0562484	0.216402	1.05786	0.692187	1.61671	0.794921	25994	1875	24119	FALSE
submucosal	771.2	Cramp of limb	symptoms	0.123647	0.47664	1.13162	0.444606	2.88021	0.795315	27549	2059	25490	FALSE
submucosal	732	Osteochondropathies	musculoskeletal	0.135676	0.52811	1.14531	0.406806	3.22448	0.797249	25778	1897	23881	FALSE
submucosal	989	Toxic effect of other substances, chiefly nonmedicinal as to source	injuries & poisonings	0.275792	1.07828	1.31757	0.159193	10.905	0.798128	31076	2440	28636	FALSE
submucosal	316	Substance addiction and disorders	mental disorders	-0.0300491	0.11803	0.970398	0.769981	1.22298	0.799041	28341	2206	26135	FALSE
submucosal	378.1	Strabismus (not specified as paralytic)	sense organs	0.0880897	0.351467	1.09209	0.548381	2.17486	0.802097	27377	2065	25312	FALSE
submucosal	525.2	Atrophy of edentulous alveolar ridge	digestive	-0.259342	1.03719	0.771559	0.10104	5.89176	0.802555	28322	2163	26159	FALSE
submucosal	817	Concussion	injuries & poisonings	-0.183911	0.73613	0.83201	0.196572	3.52156	0.802715	30637	2392	28245	FALSE
submucosal	414.2	ASCVD	circulatory system	0.187969	0.757719	1.2068	0.273307	5.32865	0.804079	28203	2158	26045	FALSE
submucosal	272.9	Unspecified disorder of lipoid metabolism	endocrine/metabolic	-0.181947	0.735964	0.833645	0.197023	3.52733	0.804736	23898	1724	22174	FALSE
submucosal	508	Pulmonary collapse; interstitial and compensatory emphysema	respiratory	0.023716	0.0982127	1.024	0.844694	1.24137	0.809186	28662	2199	26463	FALSE
submucosal	394.1	Mitral valve stenosis and aortic valve stenosis	circulatory system	0.0849662	0.353666	1.08868	0.544319	2.17744	0.810141	28931	2220	26711	FALSE
submucosal	525	Other diseases of the teeth and supporting structures	digestive	-0.0452248	0.188946	0.955783	0.659971	1.38418	0.810832	28658	2194	26464	FALSE
submucosal	352.2	Facial nerve disorders [CN7]	neurological	-0.0752724	0.316619	0.927491	0.498653	1.72513	0.812084	27797	2128	25669	FALSE
submucosal	426.91	Cardiac pacemaker in situ	circulatory system	-0.246856	1.03891	0.781254	0.101966	5.98591	0.812183	23473	1720	21753	FALSE
submucosal	90.2	Gonococcal infections	infectious diseases	0.112934	0.481489	1.11956	0.435708	2.87673	0.814556	30873	2407	28466	FALSE
submucosal	748	Anomalies of respiratory system, congenital	congenital anomalies	-0.243957	1.04482	0.783521	0.101084	6.07321	0.815379	31038	2430	28608	FALSE
submucosal	80	Postoperative infection	infectious diseases	-0.0547245	0.235683	0.946746	0.596508	1.50262	0.816386	30705	2409	28296	FALSE
submucosal	253.7	Other disorders of neurohypophysis	endocrine/metabolic	-0.239522	1.03273	0.787004	0.103967	5.9574	0.816592	27146	2002	25144	FALSE
submucosal	709.4	Polymyositis	dermatologic	0.173676	0.75108	1.18967	0.272957	5.18512	0.817132	25701	1845	23856	FALSE
submucosal	255.12	Hyperaldosteronism	endocrine/metabolic	0.122735	0.530934	1.13058	0.399358	3.20068	0.817185	27168	2005	25163	FALSE
submucosal	245	Thyroiditis	endocrine/metabolic	-0.0381276	0.165126	0.96259	0.69644	1.33045	0.817392	25489	1881	23608	FALSE
submucosal	618	Genital prolapse	genitourinary	0.0266532	0.116021	1.02701	0.818119	1.28924	0.818303	30609	2368	28241	FALSE
submucosal	804	Fracture of hand or wrist	injuries & poisonings	0.0442269	0.194051	1.04522	0.714543	1.52893	0.819713	28592	2215	26377	FALSE
submucosal	473.3	Paralysis/spasm of vocal cords or larynx	respiratory	0.0905529	0.397744	1.09478	0.502065	2.38722	0.819906	21269	1459	19810	FALSE
submucosal	752	Nervous system congenital anomalies	congenital anomalies	0.0722322	0.318264	1.0749	0.576047	2.00577	0.820457	30916	2423	28493	FALSE
submucosal	807	Fracture of ribs	injuries & poisonings	-0.0895199	0.394859	0.91437	0.421708	1.98259	0.820647	28347	2192	26155	FALSE
submucosal	874	Complication of amputation stump	injuries & poisonings	0.172367	0.76074	1.18811	0.267487	5.27731	0.820752	28624	2192	26432	FALSE
submucosal	458.1	Orthostatic hypotension	circulatory system	-0.0533223	0.235831	0.948074	0.597171	1.50517	0.821121	28796	2243	26553	FALSE
submucosal	530.9	Heartburn	digestive	-0.0543672	0.241065	0.947084	0.590459	1.5191	0.821568	23028	1608	21420	FALSE
submucosal	596	Other disorders of bladder	genitourinary	0.0346951	0.155713	1.0353	0.762996	1.4048	0.82368	29208	2247	26961	FALSE
submucosal	245.21	Chronic lymphocytic thyroiditis	endocrine/metabolic	-0.040504	0.185981	0.960305	0.666959	1.38267	0.827596	25372	1872	23500	FALSE
submucosal	709.6	Other specified diffuse diseases of connective tissue	dermatologic	0.101908	0.470042	1.10728	0.440708	2.78205	0.82836	25740	1848	23892	FALSE
submucosal	781.2	Abnormal posture	symptoms	0.0659005	0.304601	1.06812	0.587948	1.94045	0.828715	30755	2392	28363	FALSE
submucosal	809	Fracture of unspecified bones	injuries & poisonings	0.100276	0.469097	1.10548	0.440804	2.77238	0.830731	28312	2190	26122	FALSE
submucosal	578.9	Hemorrhage of gastrointestinal tract	digestive	-0.04694	0.220551	0.954145	0.619267	1.47011	0.831459	25245	1807	23438	FALSE
submucosal	375	Disorders of lacrimal system	sense organs	-0.0701405	0.332522	0.932263	0.485837	1.7889	0.832938	27402	2066	25336	FALSE
submucosal	516	Abnormal sputum	respiratory	0.0615333	0.294561	1.06347	0.597019	1.89434	0.834528	31019	2426	28593	FALSE
submucosal	516.1	Hemoptysis	respiratory	0.0615333	0.294561	1.06347	0.597019	1.89434	0.834528	31019	2426	28593	FALSE
submucosal	369.2	Eye infection, viral	sense organs	0.0733891	0.351852	1.07615	0.539971	2.14474	0.834777	26345	1976	24369	FALSE
submucosal	535.6	Duodenitis	digestive	0.110057	0.528114	1.11634	0.396513	3.14295	0.83492	28025	2124	25901	FALSE
submucosal	743.13	Other specified osteoporosis	musculoskeletal	0.0387444	0.186386	1.0395	0.721392	1.49789	0.835329	28648	2226	26422	FALSE
submucosal	724.8	Other symptoms referable to back	musculoskeletal	-0.0689222	0.332146	0.933399	0.486787	1.78977	0.835615	25753	1891	23862	FALSE
submucosal	473.1	Chronic laryngitis	respiratory	0.0878427	0.428552	1.09182	0.471367	2.52895	0.837591	21259	1458	19801	FALSE
submucosal	574.1	Cholelithiasis	digestive	0.0230474	0.113158	1.02332	0.819761	1.27741	0.838608	29854	2323	27531	FALSE
submucosal	513.3	Hypoventilation	respiratory	0.0537953	0.266111	1.05527	0.62639	1.77779	0.839797	30297	2360	27937	FALSE
submucosal	345.12	Partial epilepsy	neurological	-0.056861	0.28132	0.944725	0.544304	1.63972	0.839821	27751	2130	25621	FALSE
submucosal	277.5	Other disorders of lipoid metabolism	endocrine/metabolic	-0.0739343	0.369856	0.928733	0.449845	1.91742	0.841559	30173	2333	27840	FALSE
submucosal	531.5	Gastrojejunal ulcer	digestive	-0.145538	0.738471	0.864557	0.203327	3.67614	0.843764	30316	2360	27956	FALSE
submucosal	245.2	Chronic thyroiditis	endocrine/metabolic	-0.0360934	0.18326	0.96455	0.673489	1.3814	0.843865	25383	1873	23510	FALSE
submucosal	270.34	Alpha-1-antitrypsin deficiency	endocrine/metabolic	0.206446	1.05198	1.2293	0.156386	9.66318	0.844418	29924	2308	27616	FALSE
submucosal	250.1	Type 1 diabetes	endocrine/metabolic	0.0323618	0.165968	1.03289	0.746071	1.42998	0.845402	26011	1957	24054	FALSE
submucosal	331.9	Cerebral degeneration, unspecified	neurological	-0.116925	0.602811	0.889652	0.272959	2.89963	0.846202	27624	2119	25505	FALSE
submucosal	384	Other disorders of tympanic membrane	sense organs	0.0671436	0.349589	1.06945	0.538995	2.12195	0.847691	26339	1960	24379	FALSE
submucosal	860	Bone marrow or stem cell transplant	neoplasms	0.115116	0.606151	1.122	0.342002	3.68095	0.849377	31179	2444	28735	FALSE
submucosal	526	Diseases of the jaws	digestive	0.0348944	0.185234	1.03551	0.720245	1.48877	0.850578	28680	2195	26485	FALSE
submucosal	426.2	Atrioventricular [AV] block	circulatory system	-0.0625939	0.333561	0.939325	0.48852	1.80613	0.851148	23581	1729	21852	FALSE
submucosal	289	Other diseases of blood and blood-forming organs	hematopoietic	0.0465173	0.248859	1.04762	0.643235	1.70622	0.851721	25990	1886	24104	FALSE
submucosal	854	Complications of cardiac/vascular device, implant, and graft	injuries & poisonings	-0.0567961	0.304186	0.944787	0.520482	1.71499	0.851884	29591	2283	27308	FALSE
submucosal	427.61	Supraventricular premature beats	circulatory system	-0.0796211	0.426638	0.923466	0.400184	2.13099	0.851955	23541	1725	21816	FALSE
submucosal	261.1	Vitamin A deficiency	endocrine/metabolic	-0.137771	0.738837	0.871298	0.204765	3.70747	0.852076	24286	1689	22597	FALSE
submucosal	291.8	Alteration of consciousness	mental disorders	0.0696959	0.373969	1.07218	0.515157	2.2315	0.852156	28908	2232	26676	FALSE
submucosal	750.22	Congenital anomaly of gallbladder, bile ducts, liver, pancreas	congenital anomalies	-0.112224	0.603302	0.893844	0.273981	2.9161	0.852432	29883	2336	27547	FALSE
submucosal	590	Pyelonephritis	genitourinary	-0.0304735	0.164693	0.969986	0.702387	1.33954	0.853204	23124	1682	21442	FALSE
submucosal	253.3	Diabetes insipidus	endocrine/metabolic	0.135177	0.741136	1.14474	0.267818	4.89299	0.855275	27153	2003	25150	FALSE
submucosal	580.31	Nephritis and nephropathy in diseases classified elsewhere	genitourinary	-0.0642797	0.353175	0.937743	0.469305	1.87375	0.855579	26822	2052	24770	FALSE
submucosal	134.1	Intestinal helminthiases	infectious diseases	0.191479	1.05642	1.21104	0.152728	9.60281	0.856169	30035	2321	27714	FALSE
submucosal	560.4	Other intestinal obstruction	digestive	-0.0407022	0.225093	0.960115	0.617619	1.49254	0.856506	22865	1661	21204	FALSE
submucosal	756.3	Congenital anomalies of muscle, tendon, fascia, and connective tissue	congenital anomalies	0.108522	0.603282	1.11463	0.34167	3.63626	0.857242	30690	2399	28291	FALSE
submucosal	433.21	Cerebral artery occlusion, with cerebral infarction	circulatory system	-0.0298144	0.169077	0.970626	0.696836	1.35199	0.86003	29670	2296	27374	FALSE
submucosal	496.1	Emphysema	respiratory	0.0467206	0.266684	1.04783	0.621275	1.76725	0.86093	25803	1906	23897	FALSE
submucosal	539	Bariatric surgery	digestive	0.0750431	0.431273	1.07793	0.462896	2.51014	0.861863	31092	2435	28657	FALSE
submucosal	371.1	Uveitis, noninfectious or NOS	sense organs	-0.0473201	0.272939	0.953782	0.558623	1.62847	0.862359	26419	1982	24437	FALSE
submucosal	291.4	Specific nonpsychotic mental disorders due to brain damage	mental disorders	-0.0502649	0.291784	0.950977	0.536783	1.68477	0.863227	28983	2237	26746	FALSE
submucosal	41.8	H. pylori	infectious diseases	0.0599421	0.353287	1.06178	0.531261	2.12206	0.86527	26730	2016	24714	FALSE
submucosal	198.1	Secondary malignancy of lymph nodes	neoplasms	0.0336378	0.199474	1.03421	0.699541	1.52899	0.866085	28488	2180	26308	FALSE
submucosal	370.31	Keratoconjunctivitis sicca	sense organs	0.0366471	0.217707	1.03733	0.677018	1.58939	0.866322	26521	1991	24530	FALSE
submucosal	448	Disease of capillaries	circulatory system	0.175699	1.04571	1.19208	0.153526	9.25609	0.866568	28690	2211	26479	FALSE
submucosal	334.2	Anterior horn cell disease	neurological	0.177143	1.05915	1.1938	0.14975	9.51694	0.867173	27592	2117	25475	FALSE
submucosal	696	Psoriasis and related disorders	dermatologic	0.0344066	0.206762	1.03501	0.690149	1.55218	0.867837	25831	1854	23977	FALSE
submucosal	574.12	Cholelithiasis with other cholecystitis	digestive	-0.0423848	0.255567	0.958501	0.580831	1.58174	0.868278	29015	2249	26766	FALSE
submucosal	573	Other disorders of liver	digestive	-0.0231401	0.13991	0.977126	0.742773	1.28542	0.868636	27239	2070	25169	FALSE
submucosal	283.1	Autoimmune hemolytic anemias	hematopoietic	-0.169626	1.02855	0.843981	0.112412	6.33655	0.869009	21042	1205	19837	FALSE
submucosal	276.6	Fluid overload	endocrine/metabolic	-0.0263839	0.161938	0.973961	0.709083	1.33779	0.870577	25656	1922	23734	FALSE
submucosal	353	Nerve root and plexus disorders	neurological	-0.0512636	0.316045	0.950028	0.511344	1.76506	0.871146	27801	2128	25673	FALSE
submucosal	712	Infective connective tissue disorders	musculoskeletal	-0.0981543	0.605479	0.906509	0.27668	2.97007	0.871219	28280	2169	26111	FALSE
submucosal	772.6	Facial weakness	symptoms	0.0600704	0.372767	1.06191	0.511425	2.20493	0.871977	26618	1990	24628	FALSE
submucosal	374.2	Lagophthalmos	sense organs	0.119177	0.740825	1.12657	0.263727	4.81239	0.872196	26268	1969	24299	FALSE
submucosal	430	Intracranial hemorrhage	circulatory system	-0.0420751	0.263449	0.958798	0.572103	1.60687	0.873111	29406	2272	27134	FALSE
submucosal	276.11	Hyperosmolality and/or hypernatremia	endocrine/metabolic	0.0452867	0.284882	1.04633	0.598648	1.82879	0.873695	25290	1892	23398	FALSE
submucosal	411.8	Other chronic ischemic heart disease, unspecified	circulatory system	0.0335502	0.214067	1.03412	0.679756	1.57321	0.875459	28455	2181	26274	FALSE
submucosal	433.5	Cerebral aneurysm	circulatory system	0.0521679	0.333827	1.05355	0.547642	2.02682	0.875818	29319	2266	27053	FALSE
submucosal	353.2	Nerve root lesions	neurological	-0.0816925	0.523438	0.921555	0.330341	2.57087	0.875979	27709	2121	25588	FALSE
submucosal	279	Disorders involving the immune mechanism	endocrine/metabolic	0.0189613	0.122535	1.01914	0.80155	1.2958	0.877025	30267	2344	27923	FALSE
submucosal	433.8	Late effects of cerebrovascular disease	circulatory system	0.0334654	0.222795	1.03403	0.66817	1.60022	0.880601	29447	2279	27168	FALSE
submucosal	711.3	Behcet's syndrome	musculoskeletal	-0.155787	1.04587	0.855742	0.110175	6.64666	0.88159	28256	2167	26089	FALSE
submucosal	380	Disorders of external ear	sense organs	-0.0883861	0.602724	0.915407	0.280909	2.98307	0.883413	28852	2212	26640	FALSE
submucosal	433.2	Occlusion of cerebral arteries	circulatory system	-0.0234754	0.163136	0.976798	0.709481	1.34483	0.885579	29705	2299	27406	FALSE
submucosal	575	Other biliary tract disease	digestive	-0.0227733	0.159697	0.977484	0.714781	1.33674	0.886603	29363	2276	27087	FALSE
submucosal	720.1	Spinal stenosis of lumbar region	musculoskeletal	-0.0288693	0.209857	0.971543	0.643915	1.46587	0.890583	25943	1907	24036	FALSE
submucosal	965	Poisoning by analgesics, antipyretics, and antirheumatics	injuries & poisonings	-0.101375	0.743285	0.903594	0.210512	3.87856	0.891515	30278	2348	27930	FALSE
submucosal	870.2	Open wound of ear	injuries & poisonings	0.140922	1.0528	1.15133	0.14623	9.06495	0.893518	28619	2191	26428	FALSE
submucosal	750	Digestive congenital anomalies	congenital anomalies	0.0353683	0.264259	1.036	0.61719	1.73901	0.893529	30026	2349	27677	FALSE
submucosal	117	Mycoses	infectious diseases	0.0403749	0.304023	1.0412	0.57378	1.8894	0.89435	26003	1873	24130	FALSE
submucosal	38.3	Bacteremia	infectious diseases	0.0223715	0.171071	1.02262	0.731303	1.42999	0.895955	27073	2046	25027	FALSE
submucosal	447.1	Stricture of artery	circulatory system	0.0686741	0.529383	1.07109	0.379494	3.02304	0.896784	28720	2214	26506	FALSE
submucosal	741.6	Villonodular synovitis	musculoskeletal	0.134863	1.05319	1.14438	0.145236	9.0171	0.898108	26777	1950	24827	FALSE
submucosal	440.22	Atherosclerosis of native arteries of the extremities with intermittent claudication	circulatory system	0.0673366	0.531297	1.06966	0.377567	3.03035	0.899146	28718	2214	26504	FALSE
submucosal	523.31	Acute periodontitis	digestive	-0.0489857	0.398149	0.952195	0.436329	2.07796	0.90208	28389	2169	26220	FALSE
submucosal	313.3	Autism	mental disorders	-0.12556	1.03604	0.882003	0.115765	6.7199	0.903539	30207	2349	27858	FALSE
submucosal	499	Cystic fibrosis	respiratory	-0.125818	1.03961	0.881775	0.114927	6.76541	0.903672	31168	2443	28725	FALSE
submucosal	736.2	Acquired deformities of finger	musculoskeletal	0.0568009	0.470373	1.05845	0.420997	2.66108	0.903883	27812	2082	25730	FALSE
submucosal	964	Poisoning by agents primarily affecting blood constituents	injuries & poisonings	-0.123223	1.04136	0.884066	0.114832	6.8062	0.905806	30269	2347	27922	FALSE
submucosal	571.51	Cirrhosis of liver without mention of alcohol	digestive	0.0266272	0.225189	1.02698	0.66051	1.59679	0.905875	26762	2034	24728	FALSE
submucosal	290.16	Vascular dementia	mental disorders	-11.3047	98.5637	1.23e-05	1.5536e-89	9.7616e+78	0.908687	28852	2224	26628	FALSE
submucosal	594.8	Renal colic	genitourinary	0.0696128	0.608374	1.07209	0.325368	3.53257	0.908901	29039	2261	26778	FALSE
submucosal	117.1	Histoplasmosis	infectious diseases	0.0527544	0.47052	1.05417	0.419176	2.6511	0.910729	25918	1866	24052	FALSE
submucosal	155.1	Malignant neoplasm of liver, primary	neoplasms	-11.0889	100.433	1.53e-05	4.9419e-91	4.7255e+80	0.912084	29544	2268	27276	FALSE
submucosal	292.12	Symbolic dysfunction	mental disorders	-10.2329	92.7888	3.6e-05	3.7367e-84	3.4623e+74	0.912186	28835	2224	26611	FALSE
submucosal	965.1	Opiates and related narcotics causing adverse effects in therapeutic use	injuries & poisonings	-10.2247	92.8859	3.63e-05	3.1145e-84	4.2221e+74	0.912347	30267	2346	27921	FALSE
submucosal	313.2	Tics and stuttering	mental disorders	-10.1965	92.6983	3.73e-05	4.627e-84	3.0071e+74	0.912412	30204	2348	27856	FALSE
submucosal	411.4	Coronary atherosclerosis	circulatory system	0.0119485	0.109102	1.01202	0.817183	1.25331	0.912793	29394	2260	27134	FALSE
submucosal	530.14	Reflux esophagitis	digestive	-0.0319278	0.291646	0.968576	0.546865	1.71549	0.912826	22940	1602	21338	FALSE
submucosal	250.21	Type 2 diabetes with ketoacidosis	endocrine/metabolic	-11.3856	104.242	1.14e-05	2.1008e-94	6.141e+83	0.913026	25586	1915	23671	FALSE
submucosal	557	Intestinal malabsorption (non-celiac)	digestive	0.0331098	0.30332	1.03366	0.570411	1.87314	0.913077	22732	1651	21081	FALSE
submucosal	681.5	Cellulitis and abscess of leg, except foot	dermatologic	0.0191612	0.176226	1.01935	0.721631	1.43989	0.913416	26765	2032	24733	FALSE
submucosal	270.11	Disturbances of sulphur-bearing amino-acid metabolism	endocrine/metabolic	-10.9775	100.987	1.71e-05	1.8641e-91	1.5653e+81	0.913439	29941	2307	27634	FALSE
submucosal	346	Abnormal findings on study of brain and/or nervous system	neurological	-10.1075	93.1169	4.08e-05	2.227e-84	7.4655e+74	0.913563	27594	2116	25478	FALSE
submucosal	346.2	Nonspecific abnormal results of function study of brain and central nervous system	neurological	-10.1075	93.1169	4.08e-05	2.227e-84	7.4655e+74	0.913563	27594	2116	25478	FALSE
submucosal	149.4	Cancer of larynx	neoplasms	-9.4169	87.0463	8.13e-05	6.5313e-79	1.0129e+70	0.913851	30927	2423	28504	FALSE
submucosal	816	Cerebral laceration and contusion	injuries & poisonings	-10.074	93.1847	4.22e-05	2.0161e-84	8.8165e+74	0.91391	30621	2390	28231	FALSE
submucosal	204.22	Myeloid leukemia, chronic	neoplasms	-11.0582	102.515	1.58e-05	8.6136e-93	2.8828e+82	0.9141	30354	2360	27994	FALSE
submucosal	440.21	Atherosclerosis of native arteries of the extremities with ulceration or gangrene	circulatory system	-11.249	104.409	1.3e-05	1.7359e-94	9.7669e+83	0.914203	28704	2210	26494	FALSE
submucosal	1000	Burns	NULL	0.0254061	0.236602	1.02573	0.645111	1.63092	0.914488	31189	2445	28744	FALSE
submucosal	756.2	Pectus and other congenital anomalies of ribs/sternum	congenital anomalies	-9.94217	93.6692	4.81e-05	8.8984e-85	2.6003e+75	0.91547	30664	2396	28268	FALSE
submucosal	979	Adverse drug events and drug allergies	injuries & poisonings	-0.0555051	0.523463	0.946007	0.339089	2.63922	0.915555	30306	2350	27956	FALSE
submucosal	218.1	Uterine leiomyoma	neoplasms	16.7144	160.925	1.81541e+07	1.892e-130	1.742e+144	0.917277	17578	2249	15329	FALSE
submucosal	218	Benign neoplasm of uterus	neoplasms	16.7057	160.915	1.79966e+07	1.913e-130	1.693e+144	0.917315	17866	2260	15606	FALSE
submucosal	254	Diseases of thymus gland	endocrine/metabolic	-10.1198	97.4818	4.03e-05	4.2348e-88	3.8298e+78	0.917318	27140	2001	25139	FALSE
submucosal	199.4	Neurofibromatosis	neoplasms	-0.0771258	0.743528	0.925773	0.215576	3.97565	0.917384	28144	2154	25990	FALSE
submucosal	752.2	Other specified congenital anomalies of nervous system	congenital anomalies	-0.0484831	0.468251	0.952673	0.380505	2.38522	0.917534	30857	2417	28440	FALSE
submucosal	480.11	Pneumococcal pneumonia	respiratory	0.0364423	0.352277	1.03711	0.519951	2.06867	0.917608	25506	1867	23639	FALSE
submucosal	290.12	Dementia with cerebral degenerations	mental disorders	-10.0943	97.6796	4.13e-05	2.9481e-88	5.7901e+78	0.917693	28834	2224	26610	FALSE
submucosal	523.32	Chronic periodontitis	digestive	-10.5049	102.063	2.74e-05	3.6294e-92	2.0689e+82	0.918022	28317	2162	26155	FALSE
submucosal	756.5	Congenital osteodystrophies	congenital anomalies	-10.3725	101.565	3.13e-05	1.1008e-91	8.8894e+81	0.918656	30662	2396	28266	FALSE
submucosal	364.2	Corneal edema	sense organs	-11.2326	110.644	1.32e-05	8.7e-100	2.0134e+89	0.919138	28776	2212	26564	FALSE
submucosal	750.14	Congenital anomalies of esophagus	congenital anomalies	-10.2356	101.794	3.59e-05	8.0585e-92	1.5965e+82	0.919905	29854	2333	27521	FALSE
submucosal	452.8	Postphlebitic syndrome	circulatory system	-11.2711	113.325	1.27e-05	4.376e-102	3.7067e+91	0.920775	25593	1870	23723	FALSE
submucosal	716.1	Unspecified polyarthropathy or polyarthritis	musculoskeletal	-10.1518	102.09	3.9e-05	4.9037e-92	3.1026e+82	0.920789	28253	2166	26087	FALSE
submucosal	580.13	Acute glomerulonephritis, NOS	genitourinary	-9.67875	98.3792	6.26e-05	1.1337e-88	3.4567e+79	0.921629	26731	2043	24688	FALSE
submucosal	736.1	Acquired deformities of forearm	musculoskeletal	0.104104	1.05913	1.10972	0.139208	8.84627	0.9217	27763	2078	25685	FALSE
submucosal	802	Fracture of pelvis	injuries & poisonings	0.0343662	0.349729	1.03496	0.52147	2.0541	0.921722	28363	2194	26169	FALSE
submucosal	383	Otosclerosis	sense organs	0.0719544	0.736063	1.07461	0.253922	4.54777	0.922126	26253	1953	24300	FALSE
submucosal	159.2	Malignant neoplasm of small intestine, including duodenum	neoplasms	0.051021	0.522298	1.05235	0.378068	2.92918	0.922182	29569	2272	27297	FALSE
submucosal	527.2	Sialoadenitis	digestive	-0.036273	0.372083	0.964377	0.465075	1.99973	0.92234	29487	2292	27195	FALSE
submucosal	420.1	Myocarditis	circulatory system	-11.2549	116.003	1.29e-05	2.337e-104	7.1689e+93	0.922709	30063	2339	27724	FALSE
submucosal	363.4	Choroidal degenerations	sense organs	-9.35018	97.2766	8.69e-05	1.3669e-87	5.531e+78	0.923426	28757	2212	26545	FALSE
submucosal	81	Infection/inflammation of internal prosthetic device; implant; and graft	infectious diseases	-0.0269775	0.281166	0.973383	0.560984	1.68895	0.923561	30628	2403	28225	FALSE
submucosal	593.2	Microscopic hematuria	genitourinary	0.0246271	0.256801	1.02493	0.619586	1.69547	0.923601	22804	1657	21147	FALSE
submucosal	974	Poisoning by water, mineral, and uric acid metabolism drugs	injuries & poisonings	-10.3327	107.818	3.26e-05	5.4458e-97	1.9456e+87	0.923652	30264	2346	27918	FALSE
submucosal	133	Arthropod-borne diseases	infectious diseases	-9.41404	98.382	8.16e-05	1.4693e-88	4.5285e+79	0.923768	30029	2320	27709	FALSE
submucosal	366.1	Nonsenile Cataract	sense organs	-10.2559	107.239	3.51e-05	1.8285e-96	6.7563e+86	0.92381	28403	2170	26233	FALSE
submucosal	442.2	Aneurysm of iliac artery	circulatory system	-10.2709	107.433	3.46e-05	1.233e-96	9.7237e+86	0.923835	28687	2210	26477	FALSE
submucosal	270.38	Other specified disorders of plasma protein metabolism	endocrine/metabolic	-0.0409403	0.430825	0.959886	0.412567	2.23329	0.924293	29981	2313	27668	FALSE
submucosal	362.1	Retinopathy of prematurity	sense organs	-9.2593	97.7346	9.52e-05	6.1e-88	1.4864e+79	0.924522	28628	2201	26427	FALSE
submucosal	958.1	Postoperative shock	injuries & poisonings	-0.0989021	1.04449	0.905831	0.116939	7.01674	0.924562	31033	2433	28600	FALSE
submucosal	986	Toxic effect of carbon monoxide	injuries & poisonings	-9.26366	97.8776	9.48e-05	4.5889e-88	1.9587e+79	0.924597	31072	2439	28633	FALSE
submucosal	253.4	Anterior pituitary disorders	endocrine/metabolic	-11.2197	118.927	1.34e-05	7.844e-107	2.2919e+96	0.924839	27149	2001	25148	FALSE
submucosal	509.5	Respiratory arrest	respiratory	-10.1487	107.609	3.91e-05	9.868e-97	1.5515e+87	0.924862	27206	2072	25134	FALSE
submucosal	711.2	Reiter's disease	musculoskeletal	-10.1498	107.766	3.91e-05	7.2352e-97	2.1113e+87	0.924964	28252	2166	26086	FALSE
submucosal	876	Posttraumatic wound infection not elsewhere classified	injuries & poisonings	-10.1501	107.811	3.91e-05	6.6228e-97	2.3053e+87	0.924993	28617	2190	26427	FALSE
submucosal	668	Complications of the administration of anesthetic or other sedation in labor and delivery	pregnancy complications	-9.20867	97.8283	0.00010017	5.3403e-88	1.8788e+79	0.925005	31161	2444	28717	FALSE
submucosal	599.1	Urinary obstruction	genitourinary	-12.1398	129.092	5.34e-06	6.953e-116	4.105e+104	0.925077	22461	1571	20890	FALSE
submucosal	348.7	Coma	neurological	0.0568818	0.607568	1.05853	0.321759	3.48238	0.925409	27616	2119	25497	FALSE
submucosal	580.14	Chronic glomerulonephritis, NOS	genitourinary	-0.0699145	0.747068	0.932474	0.215635	4.03231	0.925439	26748	2045	24703	FALSE
submucosal	520.1	Hereditary disturbances in tooth structure	digestive	-9.08291	97.7794	0.00011359	6.6656e-88	1.9357e+79	0.925989	28311	2162	26149	FALSE
submucosal	195.3	Malignant neoplasm of head, face, and neck	neoplasms	-0.0559113	0.601917	0.945623	0.290641	3.07666	0.925992	28163	2155	26008	FALSE
submucosal	420.3	Endocarditis	circulatory system	0.0344597	0.373891	1.03506	0.497397	2.15391	0.926567	30127	2347	27780	FALSE
submucosal	459.9	Circulatory disease NEC	circulatory system	-0.0278824	0.303744	0.972503	0.536215	1.76377	0.92686	28693	2235	26458	FALSE
submucosal	756.21	Pectus excavatum	congenital anomalies	-9.92746	108.151	4.88e-05	4.2512e-97	5.6053e+87	0.926863	30661	2396	28265	FALSE
submucosal	225.1	Benign neoplasm of brain, cranial nerves, meninges	neoplasms	0.02647	0.291525	1.02682	0.579889	1.81822	0.927653	30805	2407	28398	FALSE
submucosal	446.6	Polyarteritis nodosa	circulatory system	-8.89898	98.2364	0.00013653	3.2711e-88	5.6983e+79	0.92782	28682	2210	26472	FALSE
submucosal	360.3	Hypotony of eye	sense organs	-10.2829	113.916	3.42e-05	3.693e-102	3.17e+92	0.928075	28761	2212	26549	FALSE
submucosal	433.32	Moyamoya disease	circulatory system	-8.87314	98.314	0.0001401	2.8832e-88	6.8081e+79	0.928086	29210	2256	26954	FALSE
submucosal	695.22	Pemphigus and pemphigoid	dermatologic	-10.3086	114.284	3.33e-05	1.747e-102	6.3643e+92	0.928127	25954	1870	24084	FALSE
submucosal	204.3	Monocytic leukemia	neoplasms	-10.2135	113.433	3.67e-05	1.019e-101	1.3202e+92	0.928256	30335	2360	27975	FALSE
submucosal	658	Maternal complication of pregnancy affecting fetus or newborn	pregnancy complications	-10.9749	122.204	1.71e-05	1.627e-109	1.803e+99	0.92844	31172	2445	28727	FALSE
submucosal	757	Congenital anomalies of the integument	congenital anomalies	-10.1739	113.664	3.82e-05	6.743e-102	2.1586e+92	0.928677	30732	2407	28325	FALSE
submucosal	639	Complications following abortion or ectopic and molar pregnancies	pregnancy complications	-10.1389	113.77	3.95e-05	5.675e-102	2.7511e+92	0.928989	31172	2445	28727	FALSE
submucosal	244.5	Congenital hypothyroidism	endocrine/metabolic	-11.1573	125.323	1.43e-05	2.999e-112	6.789e+101	0.929059	24927	1840	23087	FALSE
submucosal	364.1	Corneal opacity	sense organs	0.0467622	0.526537	1.04787	0.373346	2.94107	0.929232	28797	2216	26581	FALSE
submucosal	301.1	Schizoid personality disorder	mental disorders	-10.0771	114.15	4.2e-05	2.865e-102	6.1656e+92	0.929655	20090	1377	18713	FALSE
submucosal	528.7	Sialolithiasis	digestive	-11.3612	128.712	1.16e-05	3.192e-115	4.243e+104	0.929664	29411	2284	27127	FALSE
submucosal	149.9	Cancer of of nasal cavities	neoplasms	-10.0687	114.088	4.24e-05	3.262e-102	5.5066e+92	0.929675	30930	2423	28507	FALSE
submucosal	378.2	Nystagmus and other irregular eye movements	sense organs	-0.065264	0.74117	0.93682	0.219159	4.00454	0.929833	27301	2058	25243	FALSE
submucosal	81.11	Acute graft-versus-host disease	infectious diseases	-11.0463	125.617	1.59e-05	1.884e-112	1.35e+102	0.929928	30476	2389	28087	FALSE
submucosal	743.21	Pathologic fracture of vertebrae	musculoskeletal	-11.0135	125.481	1.65e-05	2.541e-112	1.069e+102	0.93006	28282	2193	26089	FALSE
submucosal	696.3	Pityriasis	dermatologic	-11.2625	128.904	1.28e-05	2.417e-115	6.827e+104	0.930377	25963	1870	24093	FALSE
submucosal	983	Toxic effect of corrosive aromatics, acids, and caustic alkalis	injuries & poisonings	-9.76142	113.335	5.76e-05	1.941e-101	1.7115e+92	0.931364	31071	2439	28632	FALSE
submucosal	526.42	Arthralgia/ankylosis of temporomandibular joint	digestive	-11.1179	129.092	1.48e-05	1.935e-115	1.139e+105	0.931368	28324	2162	26162	FALSE
submucosal	529.1	Glossitis	digestive	0.0635365	0.738917	1.0656	0.250389	4.53495	0.931477	29419	2286	27133	FALSE
submucosal	960	Poisoning by antibiotics	injuries & poisonings	-10.4252	121.941	2.97e-05	4.721e-109	1.865e+99	0.931869	30262	2346	27916	FALSE
submucosal	260.22	Nutritional marasmus	endocrine/metabolic	-11.0337	129.077	1.61e-05	2.165e-115	1.205e+105	0.931878	24277	1687	22590	FALSE
submucosal	159.3	Malignant neoplasm of gallbladder and extrahepatic bile ducts	neoplasms	-10.9919	129.256	1.68e-05	1.59e-115	1.783e+105	0.93223	29533	2268	27265	FALSE
submucosal	715.2	Ankylosing spondylitis	musculoskeletal	-0.0508049	0.60002	0.950464	0.293217	3.08094	0.932522	28372	2164	26208	FALSE
submucosal	751.3	Obstructive genitourinary defect	congenital anomalies	-12.1732	144.023	5.17e-06	1.314e-128	2.032e+117	0.932641	29881	2333	27548	FALSE
submucosal	721.8	Other allied disorders of spine	musculoskeletal	-0.0442539	0.52596	0.956711	0.341251	2.68218	0.932946	25672	1885	23787	FALSE
submucosal	41.21	Rheumatic fever / chorea	infectious diseases	-10.2224	121.641	3.63e-05	1.041e-108	1.268e+99	0.933026	26643	2007	24636	FALSE
submucosal	79.1	Varicella infection	infectious diseases	-10.1777	121.843	3.8e-05	7.323e-109	1.973e+99	0.93343	24819	1810	23009	FALSE
submucosal	333.8	Other degenerative diseases of the basal ganglia	neurological	-11.1007	132.996	1.51e-05	9.346e-119	2.44e+108	0.933481	27598	2116	25482	FALSE
submucosal	985	Toxic effect of other metals	injuries & poisonings	-10.1455	121.796	3.93e-05	8.293e-109	1.858e+99	0.933614	31075	2439	28636	FALSE
submucosal	737.2	Lordosis (acquired)	musculoskeletal	-9.39226	113.084	8.34e-05	4.594e-101	1.5128e+92	0.933807	27756	2077	25679	FALSE
submucosal	149.1	Cancer of oropharynx	neoplasms	-11.0249	133.309	1.63e-05	5.463e-119	4.858e+108	0.934088	30938	2423	28515	FALSE
submucosal	949.1	Diaper or napkin rash	injuries & poisonings	-9.28809	112.756	9.25e-05	9.684e-101	8.8389e+91	0.93435	25654	1836	23818	FALSE
submucosal	656.1	Isoimmunization of fetus or newborn	pregnancy complications	-9.24129	112.97	9.7e-05	6.678e-101	1.4077e+92	0.934803	30797	2434	28363	FALSE
submucosal	430.3	Subdural hemorrhage	circulatory system	0.0384644	0.470577	1.03921	0.413183	2.61377	0.934854	29265	2261	27004	FALSE
submucosal	987	Toxic effect of other gases, fumes, or vapors	injuries & poisonings	-9.23486	113.024	9.76e-05	6.049e-101	1.5741e+92	0.934879	31071	2439	28632	FALSE
submucosal	521.2	Dental abrasion, erosion and attrition	digestive	-9.23496	113.065	9.76e-05	5.574e-101	1.7078e+92	0.934903	28310	2162	26148	FALSE
submucosal	286.13	Congenital factor VIII disorder	hematopoietic	-9.1954	112.661	0.0001015	1.281e-100	8.0424e+91	0.934949	28214	2149	26065	FALSE
submucosal	557.1	Celiac disease	digestive	-0.0346001	0.424699	0.965992	0.420206	2.22067	0.935069	22667	1645	21022	FALSE
submucosal	756.1	Congenital anomalies of abdominal wall; diaphram	congenital anomalies	-11.1796	137.4	1.4e-05	1.539e-122	1.266e+112	0.935152	30667	2396	28271	FALSE
submucosal	444.5	Atheroembolism	circulatory system	-9.14542	112.899	0.00010671	8.44e-101	1.3492e+92	0.935438	28681	2210	26471	FALSE
submucosal	526.8	Exostosis of jaw	digestive	-9.13299	113.432	0.00010804	3.007e-101	3.8819e+92	0.935828	28310	2162	26148	FALSE
submucosal	573.1	Chronic passive congestion of liver	digestive	-0.083784	1.04063	0.91963	0.119623	7.06987	0.935829	26506	2013	24493	FALSE
submucosal	70.1	Viral hepatitis A	infectious diseases	-9.07997	112.869	0.00011392	9.558e-101	1.358e+92	0.935882	24815	1810	23005	FALSE
submucosal	117.4	Aspergillosis	infectious diseases	-11.0359	137.571	1.61e-05	1.273e-122	2.04e+112	0.936062	25875	1861	24014	FALSE
submucosal	145.2	Cancer of tongue	neoplasms	-11.0469	137.929	1.59e-05	6.239e-123	4.071e+112	0.936164	30937	2423	28514	FALSE
submucosal	136	Other infectious and parasitic diseases	infectious diseases	0.029807	0.372518	1.03026	0.496422	2.13815	0.936225	30116	2328	27788	FALSE
submucosal	741.1	Ankylosis of joint	musculoskeletal	0.048655	0.608474	1.04986	0.318557	3.45999	0.936267	26800	1952	24848	FALSE
submucosal	975	Poisoning by agents primarily acting on the smooth and skeletal muscles and respiratory system	injuries & poisonings	-9.03744	113.364	0.00011888	3.778e-101	3.7401e+92	0.93646	30258	2346	27912	FALSE
submucosal	870.6	Open wound of neck	injuries & poisonings	-8.98185	113.232	0.00012567	5.182e-101	3.0478e+92	0.936776	28611	2190	26421	FALSE
submucosal	716.8	Palindromic rheumatism	musculoskeletal	-8.98262	113.651	0.00012557	2.275e-101	6.9303e+92	0.937003	28246	2166	26080	FALSE
submucosal	736.4	Genu valgum or varum (acquired)	musculoskeletal	-11.2291	142.162	1.33e-05	1.295e-126	1.362e+116	0.937042	27767	2077	25690	FALSE
submucosal	574.2	Calculus of bile duct	digestive	-0.0214391	0.27152	0.978789	0.574866	1.66652	0.937065	28996	2247	26749	FALSE
submucosal	593.1	Gross hematuria	genitourinary	0.0164226	0.208318	1.01656	0.675784	1.52917	0.937165	22920	1666	21254	FALSE
submucosal	145.3	Cancer of major salivary glands	neoplasms	-11.1718	141.722	1.41e-05	3.252e-126	6.083e+115	0.937169	30936	2423	28513	FALSE
submucosal	870.4	Open wound of nose and sinus	injuries & poisonings	-8.95872	113.648	0.00012861	2.344e-101	7.0569e+92	0.937169	28611	2190	26421	FALSE
submucosal	251.8	Abnormality of secretion of glucagon or gastrin	endocrine/metabolic	-8.94945	113.572	0.00012981	2.745e-101	6.1385e+92	0.937192	27132	2001	25131	FALSE
submucosal	277.8	Carnitine deficiencies	endocrine/metabolic	-8.94559	113.566	0.00013031	2.788e-101	6.0911e+92	0.937216	30072	2325	27747	FALSE
submucosal	686.5	Pyoderma	dermatologic	-11.172	142.171	1.41e-05	1.347e-126	1.468e+116	0.937366	26376	1995	24381	FALSE
submucosal	528.6	Leukoplakia of oral mucosa	digestive	-11.1675	142.48	1.41e-05	7.393e-127	2.699e+116	0.937526	29408	2284	27124	FALSE
submucosal	755.4	Congenital anomalies of upper limb, including shoulder girdle	congenital anomalies	-10.2968	131.388	3.37e-05	4.883e-117	2.331e+107	0.937534	30658	2396	28262	FALSE
submucosal	747.2	Congenital anomalies of peripheral vascular system	congenital anomalies	0.0336431	0.429852	1.03422	0.445362	2.40164	0.937616	30534	2379	28155	FALSE
submucosal	427.41	Ventricular fibrillation and flutter	circulatory system	-11.1295	142.249	1.47e-05	1.208e-126	1.782e+116	0.937637	23472	1719	21753	FALSE
submucosal	276.42	Alkalosis	endocrine/metabolic	0.0292332	0.373935	1.02966	0.494761	2.14287	0.937687	25232	1886	23346	FALSE
submucosal	230	Kaposi's sarcoma	neoplasms	-8.86102	113.54	0.00014181	3.194e-101	6.2956e+92	0.937794	31183	2444	28739	FALSE
submucosal	346.3	Nonspecific abnormal findings in cerebrospinal fluid	neurological	-10.2235	131.12	3.63e-05	8.888e-117	1.483e+107	0.937851	27588	2116	25472	FALSE
submucosal	522.1	Pulpitis and necrosis of tooth pulp	digestive	-10.2483	131.459	3.54e-05	4.456e-117	2.815e+107	0.937862	28313	2162	26151	FALSE
submucosal	592.21	Urethral syndrome	genitourinary	-8.85792	113.666	0.00014225	2.506e-101	8.0748e+92	0.937884	22603	1640	20963	FALSE
submucosal	246.7	Abnormal results of function study of thyroid	endocrine/metabolic	-10.1934	131.929	3.74e-05	1.876e-117	7.464e+107	0.938413	24915	1840	23075	FALSE
submucosal	702.4	Degenerative skin disorders	dermatologic	-10.1028	131.146	4.1e-05	9.516e-117	1.763e+107	0.938596	26092	1874	24218	FALSE
submucosal	149.2	Cancer of nasopharynx	neoplasms	-10.1158	131.388	4.04e-05	5.845e-117	2.797e+107	0.93863	30928	2423	28505	FALSE
submucosal	797.1	Cardiogenic shock	symptoms	-0.0331376	0.430687	0.967405	0.415911	2.25018	0.93867	30745	2409	28336	FALSE
submucosal	442.3	Aneurysm of artery of lower extremity	circulatory system	-11.3063	147.176	1.23e-05	6.471e-131	2.336e+120	0.938766	28691	2210	26481	FALSE
submucosal	696.2	Parapsoriasis	dermatologic	-10.0832	131.322	4.18e-05	6.872e-117	2.539e+107	0.938797	25952	1870	24082	FALSE
submucosal	394.4	Acute rheumatic heart disease	circulatory system	-11.1079	147.657	1.5e-05	3.075e-131	7.311e+120	0.940034	28847	2211	26636	FALSE
submucosal	480.13	MRSA pneumonia	respiratory	-11.0415	147.922	1.6e-05	1.953e-131	1.314e+121	0.940498	25419	1858	23561	FALSE
submucosal	379.51	Pigmentary iris degeneration	sense organs	-11.0251	148.342	1.63e-05	8.723e-132	3.042e+121	0.940754	27289	2056	25233	FALSE
submucosal	426.25	Other heart block	circulatory system	-11.3324	153.573	1.2e-05	2.263e-136	6.341e+125	0.941176	23470	1719	21751	FALSE
submucosal	958	Certain early complications of trauma or procedure	injuries & poisonings	0.0381316	0.522923	1.03887	0.372769	2.89522	0.94187	31072	2436	28636	FALSE
submucosal	509.8	Dependence on respirator [Ventilator] or supplemental oxygen	respiratory	-8.64399	119.468	0.00017618	3.57e-106	8.6941e+97	0.94232	27198	2072	25126	FALSE
submucosal	8.7	Intestinal infection due to protozoa	infectious diseases	-10.3229	143.707	3.29e-05	1.551e-127	6.965e+117	0.942735	30122	2333	27789	FALSE
submucosal	972.1	Cardiac rhythm regulators causing adverse effects in therapeutic use	injuries & poisonings	-8.56931	119.468	0.00018984	3.847e-106	9.3681e+97	0.942818	30256	2346	27910	FALSE
submucosal	198.6	Secondary malignancy of bone	neoplasms	-10.2779	143.948	3.44e-05	1.012e-127	1.169e+118	0.94308	28126	2152	25974	FALSE
submucosal	750.11	Esophageal atresia/tracheoesophageal fistula	congenital anomalies	-10.2954	144.233	3.38e-05	5.694e-128	2.005e+118	0.943095	29849	2333	27516	FALSE
submucosal	910	Superficial injury, infected	injuries & poisonings	-8.52166	119.468	0.00019911	4.035e-106	9.8253e+97	0.943135	31163	2444	28719	FALSE
submucosal	965.3	Salicylates causing adverse effects in therapeutic use	injuries & poisonings	-10.2858	144.337	3.41e-05	4.687e-128	2.483e+118	0.943189	30260	2346	27914	FALSE
submucosal	729.1	Rheumatism, unspecified and fibrositis	musculoskeletal	-8.50336	119.468	0.00020279	4.109e-106	1.0007e+98	0.943257	22994	1575	21419	FALSE
submucosal	736.3	Acquired deformities of hip	musculoskeletal	-10.2498	144.681	3.54e-05	2.475e-128	5.053e+118	0.943522	27758	2077	25681	FALSE
submucosal	270.31	Polyclonal hypergammaglobulinemia	endocrine/metabolic	-10.2073	144.401	3.69e-05	4.467e-128	3.048e+118	0.943647	29918	2307	27611	FALSE
submucosal	277.1	Disorders of porphyrin metabolism	endocrine/metabolic	-10.1601	144.281	3.87e-05	5.931e-128	2.523e+118	0.94386	30074	2325	27749	FALSE
submucosal	458.9	Hypotension NOS	circulatory system	0.00894163	0.126992	1.00898	0.786657	1.29414	0.943867	29390	2295	27095	FALSE
submucosal	394.3	Aortic valve disease	circulatory system	-10.1636	144.392	3.85e-05	4.749e-128	3.129e+118	0.943884	28839	2211	26628	FALSE
submucosal	264.2	Failure to thrive (childhood)	endocrine/metabolic	-8.39775	119.468	0.00022537	4.567e-106	1.1121e+98	0.943961	24261	1687	22574	FALSE
submucosal	981	Toxic effect of (non-ethyl) alcohol and petroleum and other solvents	injuries & poisonings	-8.39392	119.468	0.00022624	4.584e-106	1.1166e+98	0.943986	31069	2439	28630	FALSE
submucosal	256.1	Hyperestrogenism	endocrine/metabolic	-10.128	144.417	3.99e-05	4.689e-128	3.403e+118	0.94409	27134	2001	25133	FALSE
submucosal	334.21	Amyotrophic Lateral Sclerosis	neurological	-10.0822	144.303	4.18e-05	6.136e-128	2.85e+118	0.944299	27587	2116	25471	FALSE
submucosal	255.13	Medulloadrenal hyperfunction	endocrine/metabolic	-10.118	144.911	4.03e-05	1.799e-128	9.051e+118	0.944335	27134	2001	25133	FALSE
submucosal	694.3	Vascular disorders of skin	dermatologic	-11.1558	160.009	1.43e-05	8.961e-142	2.28e+131	0.944417	25957	1870	24087	FALSE
submucosal	1014	Effects of heat, cold and air pressure	NULL	-9.65061	139.129	6.44e-05	2.399e-123	1.728e+114	0.944699	31189	2445	28744	FALSE
submucosal	973	Poisoning by agents primarily affecting the gastrointestinal system	injuries & poisonings	-8.19595	119.468	0.00027577	5.588e-106	1.3608e+98	0.945305	30256	2346	27910	FALSE
submucosal	275.2	Disorders of copper metabolism	endocrine/metabolic	-9.94733	145.036	4.79e-05	1.669e-128	1.372e+119	0.94532	29082	2234	26848	FALSE
submucosal	283.21	Hemolytic-uremic syndrome	hematopoietic	-9.92625	144.732	4.89e-05	3.093e-128	7.724e+118	0.945321	21028	1204	19824	FALSE
submucosal	285.3	Sideroblastic anemia	hematopoietic	-9.93821	145.019	4.83e-05	1.744e-128	1.338e+119	0.945363	21028	1204	19824	FALSE
submucosal	426.4	Anomalous atrioventricular excitation	circulatory system	-11.0076	160.958	1.66e-05	1.618e-142	1.698e+132	0.945477	23469	1719	21750	FALSE
submucosal	870.8	Open wound of genital organs	injuries & poisonings	-9.92217	145.128	4.91e-05	1.43e-128	1.684e+119	0.945492	28613	2190	26423	FALSE
submucosal	305.21	Anorexia nervosa	mental disorders	-10.9804	160.638	1.7e-05	3.117e-142	9.307e+131	0.945503	20093	1377	18716	FALSE
submucosal	145.1	Cancer of lip	neoplasms	-8.16144	119.468	0.00028545	5.785e-106	1.4086e+98	0.945535	30923	2423	28500	FALSE
submucosal	277.2	Other disorders of purine and pyrimidine metabolism	endocrine/metabolic	-8.15597	119.468	0.00028702	5.816e-106	1.4163e+98	0.945571	30070	2325	27745	FALSE
submucosal	302.1	Decreased libido	mental disorders	-10.9552	160.737	1.75e-05	2.631e-142	1.159e+132	0.945661	20093	1377	18716	FALSE
submucosal	754.1	Lumbosacral spondylolysis, congenital	congenital anomalies	-8.13335	119.468	0.00029358	5.949e-106	1.4487e+98	0.945722	30653	2396	28257	FALSE
submucosal	270.12	Phenylketonuria [PKU]	endocrine/metabolic	-8.12138	119.468	0.00029712	6.021e-106	1.4662e+98	0.945802	29914	2307	27607	FALSE
submucosal	656.9	Neonatal bradycardia or tachycardia	pregnancy complications	-8.1201	119.468	0.0002975	6.029e-106	1.4681e+98	0.94581	30795	2434	28361	FALSE
submucosal	289.1	Myelofibrosis	hematopoietic	-10.9325	160.948	1.79e-05	1.78e-142	1.794e+132	0.945845	25783	1868	23915	FALSE
submucosal	618.1	Prolapse of vaginal walls	genitourinary	-0.0096844	0.142905	0.990362	0.74843	1.3105	0.94597	30244	2337	27907	FALSE
submucosal	451.2	Phlebitis and thrombophlebitis of lower extremities	circulatory system	0.0268532	0.396657	1.02722	0.472086	2.23513	0.946025	25659	1877	23782	FALSE
submucosal	965.2	Antirheumatics causing adverse effects in therapeutic use	injuries & poisonings	-8.08091	119.468	0.00030939	6.27e-106	1.5267e+98	0.946072	30256	2346	27910	FALSE
submucosal	117.2	Coccidioidomycosis	infectious diseases	-9.36987	139.104	8.53e-05	3.333e-123	2.181e+114	0.946296	25862	1861	24001	FALSE
submucosal	446.1	Thromboangiitis obliterans	circulatory system	-9.29985	138.074	9.14e-05	2.694e-122	3.104e+113	0.9463	28680	2210	26470	FALSE
submucosal	287.2	Allergic purpura	hematopoietic	-9.29647	138.124	9.17e-05	2.45e-122	3.436e+113	0.946339	28213	2149	26064	FALSE
submucosal	132.1	Pediculosis and phthirus infestation	infectious diseases	-9.30715	138.294	9.08e-05	1.736e-122	4.745e+113	0.946343	30027	2320	27707	FALSE
submucosal	656.5	Hematological disorders of newborn	pregnancy complications	-9.31939	138.512	8.97e-05	1.119e-122	7.183e+113	0.946357	30796	2434	28362	FALSE
submucosal	794	Abnormal results of other function studies (bladder, pancreas, placenta, spleen, etc)	symptoms	-0.0404605	0.60153	0.960347	0.29539	3.1222	0.946373	31108	2434	28674	FALSE
submucosal	426.22	Mobitz II AV block	circulatory system	-9.27609	138.167	9.36e-05	2.297e-122	3.817e+113	0.946473	23460	1719	21741	FALSE
submucosal	984	Toxic effect of lead and its compounds (including fumes)	injuries & poisonings	-8.01604	119.468	0.00033012	6.69e-106	1.6291e+98	0.946504	31069	2439	28630	FALSE
submucosal	728.1	Muscular calcification and ossification	musculoskeletal	-11.2585	168.073	1.29e-05	1.106e-148	1.504e+138	0.946593	23003	1575	21428	FALSE
submucosal	756.22	Pectus carinatum	congenital anomalies	-7.98668	119.468	0.00033996	6.889e-106	1.6776e+98	0.9467	30653	2396	28257	FALSE
submucosal	722.3	Schmorl's nodes	musculoskeletal	-7.97841	119.468	0.00034278	6.946e-106	1.6916e+98	0.946755	25626	1881	23745	FALSE
submucosal	244.3	Iodine hypothyroidism	endocrine/metabolic	-7.95828	119.468	0.00034975	7.088e-106	1.7259e+98	0.946889	24910	1840	23070	FALSE
submucosal	736.5	Acquired deformities of knee	musculoskeletal	-7.95603	119.468	0.00035054	7.104e-106	1.7298e+98	0.946904	27754	2077	25677	FALSE
submucosal	731.1	Osteitis deformans [Paget's disease of bone]	musculoskeletal	-9.20397	138.952	0.00010064	5.307e-123	1.909e+114	0.947188	25737	1893	23844	FALSE
submucosal	941	Adverse reaction to serum or vaccine	injuries & poisonings	-7.89997	119.468	0.00037075	7.513e-106	1.8296e+98	0.947277	25652	1836	23816	FALSE
submucosal	971	Poisoning by drugs primarily affecting the autonomic nervous system	injuries & poisonings	-7.89921	119.468	0.00037103	7.519e-106	1.8309e+98	0.947282	30256	2346	27910	FALSE
submucosal	264	Lack of normal physiological development	endocrine/metabolic	-9.10729	138.139	0.00011085	2.875e-122	4.275e+113	0.947435	24262	1687	22575	FALSE
submucosal	994.2	Sepsis	injuries & poisonings	0.0081859	0.124927	1.00822	0.789251	1.28794	0.947756	30748	2411	28337	FALSE
submucosal	750.15	Congenital anomalies of stomach	congenital anomalies	-7.81154	119.468	0.00040503	8.208e-106	1.9987e+98	0.947867	29845	2333	27512	FALSE
submucosal	264.1	Short stature	endocrine/metabolic	-7.74489	119.468	0.00043295	8.774e-106	2.1365e+98	0.948311	24261	1687	22574	FALSE
submucosal	521.4	Tooth complications likely association with other diseases	digestive	-9.0086	139.138	0.00012235	4.48e-123	3.342e+114	0.948376	28309	2162	26147	FALSE
submucosal	657	Infections specific to the perinatal period	pregnancy complications	-7.72898	119.468	0.00043989	8.914e-106	2.1707e+98	0.948417	31179	2445	28734	FALSE
submucosal	117.3	Blastomycotic infection	infectious diseases	-8.91629	139.275	0.00013418	3.755e-123	4.795e+114	0.948955	25862	1861	24001	FALSE
submucosal	550.2	Diaphragmatic hernia	digestive	-0.008188	0.128019	0.991845	0.771742	1.27472	0.949002	29028	2245	26783	FALSE
submucosal	691.1	Ichthyosis congenita	dermatologic	-8.88852	139.145	0.00013796	4.984e-123	3.819e+114	0.949066	25948	1870	24078	FALSE
submucosal	260.21	Kwashiorkor	endocrine/metabolic	-8.84807	139.25	0.00014366	4.217e-123	4.894e+114	0.949336	24262	1687	22575	FALSE
submucosal	384.4	Perforation of tympanic membrane	sense organs	0.0270966	0.426476	1.02747	0.445394	2.37023	0.94934	26306	1957	24349	FALSE
submucosal	440.1	Atherosclerosis of renal artery	circulatory system	-0.0334436	0.526845	0.967109	0.344363	2.71603	0.949385	28724	2214	26510	FALSE
submucosal	242.31	Thyrotoxic exophthalmos	endocrine/metabolic	-10.2246	161.407	3.63e-05	1.471e-142	8.945e+132	0.94949	24913	1840	23073	FALSE
submucosal	303.31	Gastrointestinal malfunction arising from mental factors	mental disorders	-8.7996	139.03	0.00015079	6.824e-123	3.332e+114	0.949533	20084	1377	18707	FALSE
submucosal	276.4	Acid-base balance disorder	endocrine/metabolic	0.00846162	0.133699	1.0085	0.776011	1.31063	0.949537	25877	1944	23933	FALSE
submucosal	994	Sepsis and SIRS	injuries & poisonings	0.00755108	0.119515	1.00758	0.797161	1.27354	0.949622	30835	2418	28417	FALSE
submucosal	656.7	Conditions involving the integument and temperature regulation of fetus and newborn	pregnancy complications	-8.76709	139.264	0.00015578	4.454e-123	5.449e+114	0.949804	30796	2434	28362	FALSE
submucosal	189	Cancer of urinary organs (incl. kidney and bladder)	neoplasms	0.0155612	0.248558	1.01568	0.623995	1.65324	0.95008	31089	2434	28655	FALSE
submucosal	363	Chorioretinal inflammations, scars, and other disorders of choroid	sense organs	0.0456931	0.744237	1.04675	0.243409	4.50144	0.951044	28776	2214	26562	FALSE
submucosal	871.2	Open wound of finger(s)	injuries & poisonings	-0.0157232	0.263015	0.9844	0.58788	1.64837	0.95233	28805	2206	26599	FALSE
submucosal	427.22	Atrial flutter	circulatory system	-0.0151113	0.258458	0.985002	0.593518	1.63471	0.953376	23665	1736	21929	FALSE
submucosal	614.31	Acute inflammatory pelvic disease	genitourinary	-0.0302817	0.521472	0.970172	0.349111	2.69609	0.953693	21573	1327	20246	FALSE
submucosal	426.9	Cardiac pacemaker/device in situ	circulatory system	0.0400098	0.742168	1.04082	0.243013	4.45781	0.957007	23482	1721	21761	FALSE
submucosal	626.21	Mittelschmerz	genitourinary	-11.2482	213.158	1.3e-05	4.693e-187	3.618e+176	0.957916	14886	534	14352	FALSE
submucosal	512.3	Abnormal chest sounds	respiratory	-9.84923	187.314	5.28e-05	1.895e-164	1.471e+155	0.958065	19391	1306	18085	FALSE
submucosal	290	Delirium dementia and amnestic and other cognitive disorders	mental disorders	0.0106461	0.202877	1.0107	0.679096	1.50424	0.95815	29148	2252	26896	FALSE
submucosal	440.9	Atherosclerosis of aorta	circulatory system	-0.0125699	0.244549	0.987509	0.611472	1.5948	0.959006	28902	2229	26673	FALSE
submucosal	348.2	Cerebral edema and compression of brain	neurological	-0.0101465	0.199684	0.989905	0.669297	1.46409	0.959475	27918	2144	25774	FALSE
submucosal	202.23	Lymphosarcoma	neoplasms	0.0357383	0.739517	1.03638	0.243238	4.41581	0.961456	30352	2362	27990	FALSE
submucosal	731	Osteitis deformans and osteopathies associated with other disorders classified elsewhere	musculoskeletal	0.0226028	0.472791	1.02286	0.404919	2.58383	0.96187	25790	1898	23892	FALSE
submucosal	362.23	Cystoid macular degeneration of retina	sense organs	0.0171596	0.375037	1.01731	0.48777	2.12173	0.963506	28709	2209	26500	FALSE
submucosal	724.9	Other unspecified back disorders	musculoskeletal	0.0202446	0.470248	1.02045	0.405984	2.56493	0.965661	25684	1886	23798	FALSE
submucosal	580.3	Nephritis and nephropathy without mention of glomerulonephritis	genitourinary	-0.0117775	0.274424	0.988292	0.577153	1.69231	0.965768	26884	2058	24826	FALSE
submucosal	180	Cervical cancer and dysplasia	neoplasms	18.2208	435.123	8.18823e+07	0	#NUM!	0.966598	2759	109	2650	FALSE
submucosal	747.11	Cardiac shunt/ heart septal defect	congenital anomalies	0.0119885	0.291583	1.01206	0.571486	1.79229	0.967204	30622	2386	28236	FALSE
submucosal	286.6	Defibrination syndrome	hematopoietic	-0.0299139	0.738604	0.970529	0.22819	4.12783	0.967694	28237	2151	26086	FALSE
submucosal	710.11	Acute osteomyelitis	musculoskeletal	0.0188909	0.474123	1.01907	0.402367	2.58099	0.968217	28295	2171	26124	FALSE
submucosal	411.9	Other acute and subacute forms of ischemic heart disease	circulatory system	-0.0232024	0.610929	0.977065	0.295046	3.23561	0.969704	28217	2159	26058	FALSE
submucosal	362.5	Toxic maculopathy of retina	sense organs	-0.0196649	0.528661	0.980527	0.3479	2.76354	0.970327	28666	2205	26461	FALSE
submucosal	733.2	Cyst of bone	musculoskeletal	-0.0223264	0.60485	0.977921	0.298845	3.20009	0.970555	25773	1896	23877	FALSE
submucosal	800.1	Fracture of neck of femur	injuries & poisonings	-0.0116732	0.317474	0.988395	0.530507	1.84149	0.970669	28389	2196	26193	FALSE
submucosal	858	Complication of internal orthopedic device	injuries & poisonings	-0.0100816	0.292444	0.989969	0.558069	1.75612	0.972499	29603	2284	27319	FALSE
submucosal	250.22	Type 2 diabetes with renal manifestations	endocrine/metabolic	0.0047688	0.142728	1.00478	0.759589	1.32912	0.973346	26189	1974	24215	FALSE
submucosal	870.5	Open wound of lip and mouth	injuries & poisonings	-0.0229713	0.741748	0.977291	0.228368	4.18227	0.975294	28632	2192	26440	FALSE
submucosal	411	Ischemic Heart Disease	circulatory system	-0.0027489	0.0942243	0.997255	0.829088	1.19953	0.976726	29854	2299	27555	FALSE
submucosal	255	Disorders of adrenal glands	endocrine/metabolic	0.00496749	0.174145	1.00498	0.714369	1.41381	0.977243	27593	2038	25555	FALSE
submucosal	389.3	Degenerative and vascular disorders of ear	sense organs	0.0295627	1.04322	1.03	0.1333	7.95881	0.977393	28366	2182	26184	FALSE
submucosal	446	Polyarteritis nodosa and allied conditions	circulatory system	0.0112392	0.398653	1.0113	0.462958	2.20913	0.977508	28757	2217	26540	FALSE
submucosal	818	Intracranial hemorrhage (injury)	injuries & poisonings	0.00989068	0.470797	1.00994	0.40137	2.54124	0.983239	30667	2395	28272	FALSE
submucosal	743.1	Osteoporosis	musculoskeletal	0.00235222	0.113069	1.00235	0.803111	1.25103	0.983402	29477	2291	27186	FALSE
submucosal	580.32	Nephritis and nephropathy with pathological lesion	genitourinary	0.00816667	0.400213	1.0082	0.460128	2.2091	0.98372	26801	2050	24751	FALSE
submucosal	277.51	Lipoprotein disorders	endocrine/metabolic	-0.0104605	0.525299	0.989594	0.353438	2.77077	0.984112	30116	2329	27787	FALSE
submucosal	736.6	Unequal leg length (acquired)	musculoskeletal	-0.0185018	1.04865	0.981668	0.1257	7.66648	0.985923	27765	2078	25687	FALSE
submucosal	747	Cardiac and circulatory congenital anomalies	congenital anomalies	-0.0031024	0.178798	0.996902	0.702193	1.4153	0.986156	30891	2408	28483	FALSE
submucosal	427.2	Atrial fibrillation and flutter	circulatory system	0.00236215	0.139255	1.00236	0.762938	1.31693	0.986466	24231	1782	22449	FALSE
submucosal	743.11	Osteoporosis NOS	musculoskeletal	-0.0020421	0.121322	0.99796	0.786759	1.26586	0.986571	29314	2277	27037	FALSE
submucosal	362.29	Macular degeneration (senile) of retina NOS	sense organs	0.00734403	0.469826	1.00737	0.401112	2.52996	0.987528	28686	2206	26480	FALSE
submucosal	345.11	Generalized convulsive epilepsy	neurological	0.00603948	0.398286	1.00606	0.460887	2.19609	0.987902	27662	2123	25539	FALSE
submucosal	41.12	Methicillin resistant Staphylococcus aureus	infectious diseases	-0.0047737	0.318335	0.995238	0.533279	1.85737	0.988035	26763	2018	24745	FALSE
submucosal	528.3	Cellulitis and abscess of oral soft tissues	digestive	-0.0075626	0.529239	0.992466	0.351737	2.80035	0.988599	29436	2288	27148	FALSE
submucosal	505	Other pulmonary inflamation or edema	respiratory	0.0047233	0.374171	1.00473	0.482559	2.09195	0.989928	27282	2080	25202	FALSE
submucosal	759.1	Anomalies of endocrine glands, congenital	congenital anomalies	-0.0118483	1.05627	0.988222	0.124664	7.83371	0.99105	30735	2408	28327	FALSE
submucosal	334.1	Spinocerebellar disease	neurological	0.00799243	0.744349	1.00802	0.234352	4.33584	0.991433	27605	2118	25487	FALSE
submucosal	276.41	Acidosis	endocrine/metabolic	0.00139461	0.143274	1.0014	0.756221	1.32606	0.992234	25779	1935	23844	FALSE
submucosal	736	Other acquired deformities of limbs	musculoskeletal	0.00234091	0.28174	1.00234	0.577025	1.74116	0.993371	27925	2091	25834	FALSE
submucosal	587	Kidney replaced by transpant	genitourinary	-0.0021384	0.294286	0.997864	0.560493	1.77653	0.994202	26864	2056	24808	FALSE
submucosal	191.11	Cancer of brain	neoplasms	-0.0030215	0.466991	0.996983	0.399187	2.49	0.994838	30713	2399	28314	FALSE
submucosal	681.3	Cellulitis and abscess of arm/hand	dermatologic	0.00086037	0.24356	1.00086	0.620942	1.61323	0.997181	26573	2014	24559	FALSE

## Sheet: ST6. Submucosal category count
category	number of significant associations	proportion of all phecodes tested in category
pregnancy complications	17	0.346939
genitourinary	45	0.330882
symptoms	9	0.230769
hematopoietic	8	0.137931
dermatologic	10	0.106383
respiratory	8	0.0963855
endocrine/metabolic	14	0.0897436
neurological	7	0.0864198
mental disorders	6	0.0821918
musculoskeletal	10	0.078125
infectious diseases	3	0.0454545
neoplasms	3	0.0252101
sense organs	3	0.0243902
digestive	3	0.0189873
circulatory system	3	0.0184049
congenital anomalies	0	0
injuries & poisonings	0	0

## Sheet: ST7. Submucosal pregnant subset
phenotype	predictor	predictor phecode	phecode group	beta_primary	SE_primary	OR_primary	LCI_primary	UCI_primary	p_primary	beta_pregnant_subset	SE_pregnant_subset	OR_pregnant_subset	LCI_pregnant_subset	UCI_pregnant_subset	p_pregnant_subset
submucosal	661	Fetal distress and abnormal forces of labor	pregnancy complications	-2.11791	0.502148	0.120283	0.0449539	0.321841	2.47e-05	-1.26966	0.508768	0.280928	0.103639	0.761494	0.012576
submucosal	654.1	Abnormality of organs and soft tissues of pelvis complicating pregnancy, childbirth, or the puerperium	pregnancy complications	-1.26549	0.101307	0.2821	0.231296	0.344063	8.29e-36	-0.695373	0.160728	0.498888	0.364073	0.683625	1.51569e-05
submucosal	665	Obstetrical/birth trauma	pregnancy complications	-1.17872	0.213839	0.307673	0.202333	0.467857	3.54e-08	-0.402152	0.225048	0.668879	0.430311	1.03971	0.073944
submucosal	635	Hemorrhage during pregnancy; childbirth and postpartum	pregnancy complications	-1.10908	0.198488	0.329863	0.223551	0.486732	2.3e-08	-0.10162	0.233227	0.903373	0.571926	1.4269	0.663045
submucosal	655.1	Abnormality in fetal heart rate or rhythm	pregnancy complications	-1.1054	0.157216	0.331079	0.24328	0.450564	2.05e-12	-0.448813	0.183257	0.638386	0.445751	0.91427	0.0143216
submucosal	653	Problems associated with amniotic cavity and membranes	pregnancy complications	-1.07065	0.167148	0.342786	0.247027	0.475666	1.5e-10	-0.718715	0.207562	0.487378	0.324478	0.732059	0.000534878
submucosal	654	Other and unspecified complications of birth; puerperium affecting management of mother	pregnancy complications	-1.06158	0.130926	0.345909	0.267618	0.447103	5.14e-16	-0.663934	0.174527	0.514822	0.365676	0.724799	0.000142272
submucosal	649.1	Diabetes or abnormal glucose tolerance complicating pregnancy	pregnancy complications	-1.04438	0.15838	0.351911	0.257998	0.480008	4.28e-11	-0.334129	0.187812	0.715961	0.495474	1.03457	0.075229
submucosal	638	Other high-risk pregnancy	pregnancy complications	-1.04405	0.159584	0.352025	0.257474	0.481298	6.06e-11	-0.145425	0.177716	0.864655	0.610334	1.22495	0.413188
submucosal	635.2	Antepartum hemorrhage, abruptio placentae, and placenta previa	pregnancy complications	-1.04394	0.235975	0.352063	0.221694	0.559097	9.69e-06	-0.0429007	0.269071	0.958007	0.565367	1.62333	0.873322
submucosal	646	Other complications of pregnancy NEC	pregnancy complications	-0.960384	0.153688	0.382746	0.283197	0.517288	4.13e-10	-0.212098	0.172709	0.808885	0.576599	1.13475	0.219422
submucosal	649	Other conditions or status of the mother complicating pregnancy, childbirth, or the puerperium	pregnancy complications	-0.939842	0.0977238	0.390689	0.322587	0.473169	6.76e-22	-0.235776	0.140015	0.789958	0.600372	1.03941	0.0921956
submucosal	655	Known or suspected fetal abnormality affecting management of mother	pregnancy complications	-0.917172	0.0928094	0.399648	0.333178	0.479378	4.97e-23	-0.277197	0.130801	0.757905	0.586509	0.979389	0.0340714
submucosal	644	Anemia during pregnancy	pregnancy complications	-0.817307	0.176193	0.441619	0.312658	0.623774	3.51e-06	-0.139114	0.205813	0.870129	0.581289	1.30249	0.499087
submucosal	636	Early or threatened labor; hemorrhage in early pregnancy	pregnancy complications	-0.672383	0.0936366	0.510491	0.424896	0.613328	6.93e-13	0.187356	0.148799	1.20606	0.900963	1.61446	0.207988
submucosal	642	Hypertension complicating pregnancy, childbirth, and the puerperium	pregnancy complications	-0.653326	0.125573	0.520312	0.406794	0.665509	1.96e-07	-0.0142525	0.148353	0.985849	0.737105	1.31853	0.923464
submucosal	636.3	Hemorrhage in early pregnancy	pregnancy complications	-0.511924	0.113637	0.599342	0.479672	0.748866	6.64e-06	0.322386	0.165817	1.38042	0.997388	1.91054	0.0518681

## Sheet: ST8. Submucosal White strata
phenotype	predictor	predictor phecode	beta	SE	OR	LCI	UCI	p	n_total	n_cases	n_controls	Bonferroni-corrected significant?
submucosal	626	Disorders of menstruation and other abnormal bleeding from female genital tract	1.61857	0.0795418	5.04588	4.31748	5.89718	4.76736e-92	12526	849	11677	TRUE
submucosal	280.2	Iron deficiency anemia secondary to blood loss (chronic)	1.56675	0.106881	4.79108	3.88556	5.90761	1.18226e-48	13832	848	12984	TRUE
submucosal	280	Iron deficiency anemias	1.11161	0.0818079	3.03926	2.589	3.56783	4.71093e-42	14768	951	13817	TRUE
submucosal	619	Noninflammatory female genital disorders	0.901312	0.0690157	2.46283	2.15123	2.81957	5.60824e-39	14432	928	13504	TRUE
submucosal	619.2	Disorders of uterus, NEC	1.14092	0.0904975	3.12965	2.62098	3.73705	1.92649e-36	11766	675	11091	TRUE
submucosal	626.2	Dysmenorrhea	1.53282	0.123322	4.63123	3.63682	5.89753	1.80998e-35	9305	385	8920	TRUE
submucosal	627	Menopausal and postmenopausal disorders	1.25161	0.100994	3.49597	2.86814	4.26123	2.85259e-35	10533	512	10021	TRUE
submucosal	627.2	Symptomatic menopause	1.39091	0.112299	4.01852	3.22459	5.00791	3.12108e-35	9539	421	9118	TRUE
submucosal	215	Other benign neoplasm of connective and other soft tissue	1.26024	0.104613	3.52625	2.87253	4.32874	2.01954e-33	17338	1098	16240	TRUE
submucosal	622	Polyp of female genital organs	1.07636	0.0919226	2.93398	2.45025	3.5132	1.14082e-31	15273	863	14410	TRUE
submucosal	622.1	Polyp of corpus uteri	1.04774	0.102757	2.85121	2.3311	3.48737	2.05897e-24	14971	820	14151	TRUE
submucosal	285	Other anemias	0.719873	0.0765584	2.05417	1.76795	2.38674	5.30678e-21	15724	988	14736	TRUE
submucosal	623	Hypertrophy of female genital organs	1.24453	0.133768	3.47129	2.6707	4.51187	1.35729e-20	14437	761	13676	TRUE
submucosal	610	Benign mammary dysplasias	0.818006	0.0931203	2.26598	1.88795	2.7197	1.57209e-18	15021	939	14082	TRUE
submucosal	626.1	Irregular menstrual cycle/bleeding	1.38964	0.158206	4.0134	2.94337	5.47243	1.58146e-18	8854	323	8531	TRUE
submucosal	338	Pain	0.590025	0.0698812	1.80403	1.57311	2.06885	3.08616e-17	16300	1036	15264	TRUE
submucosal	280.1	Iron deficiency anemias, unspecified or not due to blood loss	0.830247	0.0983822	2.29388	1.89159	2.78174	3.20098e-17	14407	861	13546	TRUE
submucosal	654.1	Abnormality of organs and soft tissues of pelvis complicating pregnancy, childbirth, or the puerperium	-1.43988	0.173566	0.236957	0.168627	0.332975	1.07827e-16	16735	1179	15556	TRUE
submucosal	610.1	Cystic mastopathy	0.81248	0.102918	2.25349	1.84183	2.75715	2.91567e-15	14728	901	13827	TRUE
submucosal	615	Endometriosis	0.812136	0.104503	2.25272	1.83549	2.76478	7.76066e-15	14062	821	13241	TRUE
submucosal	626.8	Infertility, female	1.31173	0.170651	3.71258	2.65714	5.18725	1.51085e-14	8872	316	8556	TRUE
submucosal	614	Inflammatory diseases of female pelvic organs	0.6599	0.0869326	1.9346	1.63152	2.29398	3.17594e-14	14824	888	13936	TRUE
submucosal	338.1	Acute pain	0.618464	0.0826861	1.85607	1.57838	2.18263	7.45157e-14	14673	887	13786	TRUE
submucosal	619.4	Noninflammatory disorders of vagina	0.953881	0.13688	2.59576	1.98495	3.39453	3.19827e-12	10920	547	10373	TRUE
submucosal	338.2	Chronic pain	0.558384	0.0842716	1.74785	1.48173	2.06175	3.4488e-11	14722	884	13838	TRUE
submucosal	622.2	Mucous polyp of cervix	1.21908	0.186858	3.38409	2.3463	4.88088	6.84067e-11	14203	724	13479	TRUE
submucosal	619.3	Noninflammatory disorders of cervix	1.08022	0.170409	2.94532	2.109	4.11327	2.31321e-10	10655	521	10134	TRUE
submucosal	285.1	Acute posthemorrhagic anemia	0.773628	0.130951	2.16762	1.67693	2.80189	3.468e-09	13880	791	13089	TRUE
submucosal	614.5	Inflammatory disease of cervix, vagina, and vulva	0.640579	0.108855	1.89758	1.53299	2.34887	3.98796e-09	14058	809	13249	TRUE
submucosal	628	Ovarian cyst	0.684379	0.117697	1.98254	1.57412	2.49694	6.07203e-09	10149	382	9767	TRUE
submucosal	626.4	Premenstrual tension syndromes	1.84291	0.318088	6.31492	3.38537	11.7796	6.88386e-09	8431	279	8152	TRUE
submucosal	611	Abnormal findings on mammogram or breast exam	0.576393	0.100422	1.77961	1.46165	2.16673	9.48401e-09	15036	909	14127	TRUE
submucosal	745	Pain in joint	0.385606	0.0688026	1.47051	1.28499	1.6828	2.08821e-08	16775	1112	15663	TRUE
submucosal	627.3	Postmenopausal atrophic vaginitis	0.850386	0.151971	2.34055	1.73763	3.15267	2.19732e-08	9162	337	8825	TRUE
submucosal	613.8	Other specified disorders of breast	0.7436	0.13309	2.10349	1.62051	2.73042	2.30771e-08	15872	1000	14872	TRUE
submucosal	654	Other and unspecified complications of birth; puerperium affecting management of mother	-1.08921	0.200221	0.336483	0.227265	0.49819	5.32727e-08	15987	1169	14818	TRUE
submucosal	649	Other conditions or status of the mother complicating pregnancy, childbirth, or the puerperium	-0.77393	0.14294	0.461197	0.348509	0.610323	6.15044e-08	17515	1192	16323	TRUE
submucosal	619.1	Noninflammatory disorders of ovary, fallopian tube, and broad ligament	0.70927	0.137747	2.03251	1.5516	2.66247	2.61769e-07	11042	544	10498	TRUE
submucosal	614.4	Inflammatory diseases of uterus, except cervix	1.34983	0.263652	3.85675	2.30037	6.46617	3.05978e-07	13092	715	12377	TRUE
submucosal	216	Benign neoplasm of skin	0.41979	0.0836524	1.52164	1.29154	1.79275	5.21391e-07	17152	1126	16026	TRUE
submucosal	261.4	Vitamin D deficiency	0.429983	0.0861956	1.53723	1.29828	1.82016	6.08615e-07	16294	1075	15219	TRUE
submucosal	261	Vitamin deficiency	0.399927	0.0805439	1.49172	1.27387	1.74681	6.85845e-07	16731	1110	15621	TRUE
submucosal	613	Other nonmalignant breast conditions	0.442245	0.090382	1.5562	1.30356	1.8578	9.92794e-07	17058	1097	15961	TRUE
submucosal	621	Endometrial hyperplasia	0.84994	0.17424	2.33951	1.66268	3.29185	1.07173e-06	14331	728	13603	TRUE
submucosal	655	Known or suspected fetal abnormality affecting management of mother	-0.610164	0.125615	0.543262	0.424701	0.69492	1.18923e-06	17545	1205	16340	TRUE
submucosal	704	Diseases of hair and hair follicles	0.558853	0.116727	1.74867	1.39106	2.1982	1.68692e-06	16791	1082	15709	TRUE
submucosal	614.32	Chronic inflammatory pelvic disease	1.0317	0.216175	2.80584	1.83675	4.28622	1.81931e-06	13172	723	12449	TRUE
submucosal	241	Nontoxic nodular goiter	0.503452	0.105947	1.65442	1.3442	2.03625	2.01481e-06	15257	1008	14249	TRUE
submucosal	300.1	Anxiety disorder	0.345632	0.0735853	1.41288	1.22312	1.63209	2.63973e-06	14818	957	13861	TRUE
submucosal	610.4	Benign neoplasm of breast	0.890651	0.189755	2.43672	1.6799	3.53449	2.68307e-06	13905	800	13105	TRUE
submucosal	599	Other symptoms/disorders or the urinary system	0.349261	0.0746261	1.41802	1.22506	1.64136	2.86669e-06	16186	1054	15132	TRUE
submucosal	300	Anxiety disorders	0.335683	0.0718805	1.39889	1.21506	1.61054	3.01185e-06	15126	980	14146	TRUE
submucosal	785	Abdominal pain	0.299011	0.064089	1.34852	1.18934	1.52902	3.07779e-06	16088	1099	14989	TRUE
submucosal	704.1	Alopecia	0.641189	0.137912	1.89874	1.44901	2.48804	3.33123e-06	16503	1054	15449	TRUE
submucosal	638	Other high-risk pregnancy	-1.18118	0.256426	0.306915	0.185671	0.507332	4.09822e-06	18088	1224	16864	TRUE
submucosal	726	Peripheral enthesopathies and allied syndromes	0.390105	0.0852126	1.47714	1.24993	1.74564	4.69386e-06	15575	993	14582	TRUE
submucosal	241.1	Nontoxic uninodular goiter	0.595462	0.131348	1.81387	1.40217	2.34645	5.80264e-06	14789	964	13825	TRUE
submucosal	465	Acute upper respiratory infections of multiple or unspecified sites	0.324292	0.0716003	1.38305	1.20196	1.59142	5.92058e-06	15214	1014	14200	TRUE
submucosal	611.3	Lump or mass in breast	0.555841	0.123246	1.74341	1.36927	2.21977	6.48229e-06	14500	853	13647	TRUE
submucosal	694.2	Other dyschromia	0.485965	0.109025	1.62574	1.31295	2.01306	8.29767e-06	15878	1003	14875	TRUE
submucosal	694	Dyschromia and Vitiligo	0.476121	0.108518	1.60982	1.30138	1.99136	1.14664e-05	15899	1004	14895	TRUE
submucosal	735	Acquired foot deformities	0.551146	0.125856	1.73524	1.3559	2.2207	1.19122e-05	16835	1101	15734	TRUE
submucosal	208	Benign neoplasm of colon	0.439654	0.100647	1.55217	1.27429	1.89065	1.25232e-05	17244	1120	16124	TRUE
submucosal	653	Problems associated with amniotic cavity and membranes	-1.24554	0.285303	0.287785	0.164518	0.503411	1.26726e-05	15584	1155	14429	TRUE
submucosal	272.1	Hyperlipidemia	0.327489	0.0756102	1.38748	1.19637	1.60912	1.48241e-05	17392	1161	16231	TRUE
submucosal	272	Disorders of lipoid metabolism	0.32266	0.075577	1.3808	1.19069	1.60126	1.96099e-05	17406	1161	16245	TRUE
submucosal	649.1	Diabetes or abnormal glucose tolerance complicating pregnancy	-1.02615	0.243381	0.358384	0.222422	0.577456	2.48425e-05	16604	1153	15451	TRUE
submucosal	947	Urticaria	0.737502	0.175964	2.09071	1.48085	2.95173	2.77459e-05	15034	931	14103	TRUE
submucosal	611.1	Abnormal mammogram	0.588729	0.14127	1.8017	1.36594	2.37647	3.08079e-05	14263	830	13433	FALSE
submucosal	686	Other local infections of skin and subcutaneous tissue	0.743001	0.178853	2.10224	1.4806	2.98486	3.26348e-05	15692	1031	14661	FALSE
submucosal	1009	Injury, NOS	0.531369	0.128884	1.70126	1.32148	2.19018	3.74232e-05	18436	1236	17200	FALSE
submucosal	591	Urinary tract infection	0.353338	0.0860324	1.42381	1.20288	1.68533	4.0077e-05	15217	1002	14215	FALSE
submucosal	454.1	Varicose veins of lower extremity	0.706436	0.173169	2.02676	1.44343	2.84581	4.51421e-05	15106	970	14136	FALSE
submucosal	636	Early or threatened labor; hemorrhage in early pregnancy	-0.565373	0.139919	0.568148	0.431877	0.747417	5.32867e-05	16972	1178	15794	FALSE
submucosal	627.21	Symptomatic artificial menopause	1.23339	0.305557	3.43283	1.88607	6.2481	5.42517e-05	8471	279	8192	FALSE
submucosal	773	Pain in limb	0.322649	0.0799512	1.38078	1.18051	1.61503	5.44683e-05	17281	1129	16152	FALSE
submucosal	599.3	Dysuria	0.359191	0.0890134	1.43217	1.20289	1.70516	5.45453e-05	14848	942	13906	FALSE
submucosal	281.12	Other vitamin B12 deficiency anemia	0.929135	0.230598	2.53232	1.61149	3.97931	5.59586e-05	13403	741	12662	FALSE
submucosal	327	Sleep disorders	0.340821	0.0846976	1.4061	1.19102	1.66002	5.72254e-05	16574	1096	15478	FALSE
submucosal	214	Lipoma	0.698188	0.173576	2.01011	1.43044	2.82468	5.76131e-05	16984	1013	15971	FALSE
submucosal	339	Other headache syndromes	0.506091	0.126272	1.65879	1.29511	2.1246	6.12475e-05	15875	1034	14841	FALSE
submucosal	741.2	Stiffness of joint	0.516393	0.129519	1.67597	1.30022	2.16031	6.69074e-05	16268	1040	15228	FALSE
submucosal	741	Symptoms and disorders of the joints	0.386112	0.0982897	1.47125	1.21345	1.78383	8.55455e-05	17043	1105	15938	FALSE
submucosal	614.52	Vaginitis and vulvovaginitis	0.527471	0.13474	1.69464	1.30132	2.20684	9.05049e-05	13708	765	12943	FALSE
submucosal	512	Other symptoms of respiratory system	0.271366	0.0694318	1.31175	1.14486	1.50298	9.29174e-05	16209	1070	15139	FALSE
submucosal	665	Obstetrical/birth trauma	-1.14932	0.295661	0.316853	0.177495	0.565627	0.000101376	18261	1228	17033	FALSE
submucosal	288	Diseases of white blood cells	0.470825	0.121701	1.60131	1.26149	2.03269	0.000109419	15881	1023	14858	FALSE
submucosal	646	Other complications of pregnancy NEC	-0.913242	0.23756	0.401221	0.251866	0.639144	0.000120915	17916	1216	16700	FALSE
submucosal	760	Back pain	0.293037	0.0766785	1.34049	1.15344	1.55788	0.000132574	16806	1122	15684	FALSE
submucosal	593	Hematuria	0.466912	0.122539	1.59506	1.2545	2.02808	0.000138787	13862	886	12976	FALSE
submucosal	288.2	Elevated white blood cell count	0.487474	0.128249	1.6282	1.26631	2.09351	0.000144121	15782	1014	14768	FALSE
submucosal	304	Adjustment reaction	0.466401	0.122936	1.59425	1.25288	2.02862	0.000148325	12003	730	11273	FALSE
submucosal	655.1	Abnormality in fetal heart rate or rhythm	-0.87885	0.23219	0.41526	0.263437	0.654583	0.000153681	16402	1149	15253	FALSE
submucosal	464	Acute sinusitis	0.356034	0.0941387	1.42766	1.18711	1.71694	0.000155565	12744	808	11936	FALSE
submucosal	614.3	Pelvic inflammatory disease (PID)	0.696017	0.18594	2.00575	1.39316	2.88769	0.000181662	13316	731	12585	FALSE
submucosal	476	Allergic rhinitis	0.316028	0.0845598	1.37167	1.16217	1.61893	0.000185979	14426	936	13490	FALSE
submucosal	271.3	Intestinal disaccharidase deficiencies and disaccharide malabsorption	0.486879	0.131133	1.62723	1.25842	2.10413	0.000204938	18145	1207	16938	FALSE
submucosal	702	Degenerative skin conditions and other dermatoses	0.370171	0.0997198	1.44798	1.19091	1.76054	0.000205542	16284	1026	15258	FALSE
submucosal	281	Other deficiency anemia	0.693735	0.188797	2.00118	1.38222	2.8973	0.000238321	13539	752	12787	FALSE
submucosal	271	Disorders of carbohydrate transport and metabolism	0.480649	0.131098	1.61712	1.25069	2.09091	0.000246048	18149	1207	16942	FALSE
submucosal	706	Diseases of sebaceous glands	0.381408	0.104202	1.46434	1.19384	1.79615	0.000251961	16966	1109	15857	FALSE
submucosal	939.1	Contact and allergic dermatitis of eyelid	2.45572	0.672909	11.6548	3.11683	43.5808	0.000262848	14734	896	13838	FALSE
submucosal	214.1	Lipoma of skin and subcutaneous tissue	0.7393	0.202962	2.09447	1.40705	3.11773	0.000269947	16883	1002	15881	FALSE
submucosal	1011	Complications of surgical and medical procedures	0.596454	0.163775	1.81567	1.31713	2.5029	0.000270611	18436	1236	17200	FALSE
submucosal	726.1	Enthesopathy	0.368744	0.102461	1.44592	1.18284	1.7675	0.000319614	14618	906	13712	FALSE
submucosal	454.11	Varicose veins of lower extremity, symptomtic	0.720722	0.200817	2.05592	1.38697	3.0475	0.000332017	15018	959	14059	FALSE
submucosal	401.1	Essential hypertension	0.254254	0.070864	1.2895	1.12228	1.48164	0.000333332	17207	1161	16046	FALSE
submucosal	454	Varicose veins	0.612939	0.172054	1.84585	1.31747	2.58614	0.000367385	15134	970	14164	FALSE
submucosal	502	Postinflammatory pulmonary fibrosis	1.01582	0.286535	2.76162	1.57493	4.84248	0.000392343	16128	1075	15053	FALSE
submucosal	418	Nonspecific chest pain	0.270551	0.0769914	1.31069	1.1271	1.52418	0.000441345	16292	1079	15213	FALSE
submucosal	610.8	Other specified benign mammary dysplasias	0.686573	0.196292	1.98689	1.35234	2.91919	0.00046928	13925	797	13128	FALSE
submucosal	562	Diverticulosis and diverticulitis	0.401306	0.115016	1.49377	1.19229	1.87149	0.000484602	13808	902	12906	FALSE
submucosal	455	Hemorrhoids	0.39545	0.113793	1.48505	1.18817	1.85611	0.000510526	15811	1028	14783	FALSE
submucosal	296.22	Major depressive disorder	0.32498	0.0945301	1.384	1.14993	1.66572	0.000586352	13013	806	12207	FALSE
submucosal	619.5	Noninflammatory disorders of vulva and perineum	0.759707	0.221164	2.13765	1.38573	3.29758	0.000592469	10563	502	10061	FALSE
submucosal	272.11	Hypercholesterolemia	0.359718	0.10505	1.43293	1.16628	1.76053	0.00061649	15103	975	14128	FALSE
submucosal	401	Hypertension	0.241735	0.0706537	1.27346	1.10877	1.4626	0.000622983	17305	1164	16141	FALSE
submucosal	281.1	Megaloblastic anemia	0.747173	0.219399	2.11102	1.37321	3.24526	0.000660331	13447	743	12704	FALSE
submucosal	272.13	Mixed hyperlipidemia	0.3187	0.0946047	1.37534	1.14256	1.65554	0.000755083	15607	1010	14597	FALSE
submucosal	599.9	Other abnormality of urination	0.459453	0.137539	1.58321	1.2091	2.07307	0.000836209	13504	827	12677	FALSE
submucosal	701	Other hypertrophic and atrophic conditions of skin	0.368162	0.110383	1.44508	1.16394	1.79412	0.000852082	17049	1103	15946	FALSE
submucosal	735.3	Hallux valgus (Bunion)	0.616169	0.185395	1.85182	1.28762	2.66324	0.000888808	16401	1055	15346	FALSE
submucosal	367.8	Hypermetropia	0.742161	0.224285	2.10047	1.35332	3.26011	0.000936284	16509	1080	15429	FALSE
submucosal	789	Nausea and vomiting	0.264829	0.0801099	1.30321	1.11384	1.52477	0.000946978	16501	1095	15406	FALSE
submucosal	612	Breast conditions, congenital or relating to hormones	0.691209	0.209476	1.99613	1.32397	3.00952	0.000967853	13890	793	13097	FALSE
submucosal	262	Mineral deficiency NEC	0.579443	0.176136	1.78504	1.26392	2.52103	0.00100277	14621	916	13705	FALSE
submucosal	278	Overweight, obesity and other hyperalimentation	0.242541	0.0740887	1.27448	1.10222	1.47367	0.00106167	16940	1110	15830	FALSE
submucosal	592.1	Cystitis	0.394684	0.12127	1.48392	1.16999	1.88207	0.00113553	13942	887	13055	FALSE
submucosal	704.2	Hirsutism	0.735511	0.226644	2.08655	1.33815	3.25351	0.00117358	16144	1012	15132	FALSE
submucosal	636.3	Hemorrhage in early pregnancy	-0.580585	0.179021	0.559571	0.393975	0.794769	0.00118233	16447	1153	15294	FALSE
submucosal	465.2	Acute pharyngitis	0.306463	0.0944971	1.35861	1.12891	1.63506	0.0011824	12767	799	11968	FALSE
submucosal	740	Osteoarthrosis	0.27031	0.0836243	1.31037	1.11227	1.54375	0.00122741	17314	1139	16175	FALSE
submucosal	592	Cystitis and urethritis	0.388077	0.120059	1.47414	1.16505	1.86525	0.00122759	13969	889	13080	FALSE
submucosal	574.3	Cholecystitis without cholelithiasis	0.768163	0.23818	2.1558	1.35165	3.43837	0.00125916	17098	1145	15953	FALSE
submucosal	110.11	Dermatophytosis of nail	0.514565	0.159828	1.67291	1.22299	2.28834	0.00128416	15852	1012	14840	FALSE
submucosal	296	Mood disorders	0.251768	0.0787535	1.2863	1.10231	1.50099	0.00138909	14411	904	13507	FALSE
submucosal	695.3	Rosacea	0.523114	0.163823	1.68727	1.22387	2.32613	0.00140722	15206	936	14270	FALSE
submucosal	512.8	Cough	0.284394	0.0891627	1.32896	1.11587	1.58273	0.00142467	13498	861	12637	FALSE
submucosal	642	Hypertension complicating pregnancy, childbirth, and the puerperium	-0.662421	0.208094	0.515602	0.342911	0.775261	0.00145622	18198	1226	16972	FALSE
submucosal	278.1	Obesity	0.236692	0.0747018	1.26705	1.09448	1.46684	0.00153234	16886	1104	15782	FALSE
submucosal	635	Hemorrhage during pregnancy; childbirth and postpartum	-0.864926	0.27584	0.421083	0.245227	0.723048	0.00171498	16083	1132	14951	FALSE
submucosal	783	Fever of unknown origin	0.308181	0.0982987	1.36095	1.12245	1.65012	0.00171769	16637	1104	15533	FALSE
submucosal	592.11	Acute cystitis	0.438347	0.140437	1.55014	1.17714	2.04133	0.00180044	13659	863	12796	FALSE
submucosal	296.2	Depression	0.254204	0.0815372	1.28943	1.09899	1.51288	0.00182305	14115	881	13234	FALSE
submucosal	626.15	Infertility, female, associated with anovulation	1.11496	0.358712	3.04946	1.50966	6.15977	0.00188205	8474	275	8199	FALSE
submucosal	695	Erythematous conditions	0.379782	0.122417	1.46197	1.1501	1.85841	0.00191981	15695	975	14720	FALSE
submucosal	244.1	Secondary hypothyroidism	0.476967	0.153818	1.61118	1.19182	2.17809	0.0019296	14646	942	13704	FALSE
submucosal	471	Nasal polyps	1.08523	0.352249	2.96013	1.48413	5.90406	0.00206395	11934	722	11212	FALSE
submucosal	453	Chronic venous hypertension	2.35891	0.767352	10.5794	2.35115	47.6043	0.00211142	14797	932	13865	FALSE
submucosal	381	Otitis media and Eustachian tube disorders	0.301032	0.0979503	1.35125	1.11522	1.63724	0.00211697	16509	1080	15429	FALSE
submucosal	735.2	Acquired toe deformities	0.570504	0.186157	1.76916	1.22831	2.54816	0.00217928	16417	1055	15362	FALSE
submucosal	740.1	Osteoarthritis; localized	0.274014	0.0895818	1.31523	1.10344	1.56768	0.00222215	16750	1096	15654	FALSE
submucosal	241.2	Nontoxic multinodular goiter	0.425832	0.139493	1.53086	1.16466	2.01222	0.00226782	14784	954	13830	FALSE
submucosal	110.12	Althete's foot	1.01525	0.334357	2.76004	1.43319	5.31528	0.00239414	15472	975	14497	FALSE
submucosal	327.4	Insomnia	0.311329	0.103234	1.36524	1.11515	1.67141	0.00256342	15763	1018	14745	FALSE
submucosal	721	Spondylosis and allied disorders	0.317037	0.105971	1.37305	1.11553	1.69002	0.002774	16010	1045	14965	FALSE
submucosal	381.2	Eustachian tube disorders	0.351795	0.118327	1.42162	1.12735	1.79269	0.00294832	15937	1033	14904	FALSE
submucosal	495	Asthma	0.298111	0.100324	1.34731	1.1068	1.64008	0.00296355	16426	1070	15356	FALSE
submucosal	738	Other acquired musculoskeletal deformity	0.489332	0.165151	1.63123	1.18014	2.25472	0.00304713	16528	1064	15464	FALSE
submucosal	555.2	Ulcerative colitis	0.686346	0.231794	1.98644	1.26116	3.12884	0.00306626	12843	813	12030	FALSE
submucosal	79.9	Viremia, NOS	0.860468	0.291395	2.36427	1.33554	4.1854	0.00314772	14624	907	13717	FALSE
submucosal	512.7	Shortness of breath	0.266264	0.0903605	1.30508	1.09325	1.55795	0.00321205	13384	844	12540	FALSE
submucosal	722	Intervertebral disc disorders	0.299655	0.10194	1.34939	1.10501	1.64783	0.00328707	16121	1054	15067	FALSE
submucosal	300.11	Generalized anxiety disorder	0.375902	0.128082	1.4563	1.13299	1.87188	0.00333711	11991	720	11271	FALSE
submucosal	479	Other upper respiratory disease	0.330923	0.112831	1.39225	1.11603	1.73685	0.00335796	13043	817	12226	FALSE
submucosal	599.2	Retention of urine	0.545117	0.187239	1.72481	1.19498	2.48956	0.00359876	13143	794	12349	FALSE
submucosal	722.6	Degeneration of intervertebral disc	0.328418	0.113049	1.38877	1.11276	1.73324	0.00367138	15784	1027	14757	FALSE
submucosal	562.1	Diverticulosis	0.355619	0.123108	1.42706	1.12112	1.8165	0.00386864	13669	885	12784	FALSE
submucosal	530	Diseases of esophagus	0.223459	0.0773667	1.25039	1.07446	1.45513	0.00387311	16372	1063	15309	FALSE
submucosal	110.1	Dermatophytosis	0.422747	0.146763	1.52615	1.14464	2.03481	0.0039707	15982	1021	14961	FALSE
submucosal	661	Fetal distress and abnormal forces of labor	-2.04959	0.711853	0.128788	0.0319105	0.519776	0.00398646	18273	1231	17042	FALSE
submucosal	798	Malaise and fatigue	0.43624	0.151868	1.54688	1.14864	2.08319	0.00407255	18007	1188	16819	FALSE
submucosal	599.4	Urinary incontinence	0.356691	0.124669	1.42859	1.11889	1.82402	0.00422168	13770	844	12926	FALSE
submucosal	112	Candidiasis	0.368377	0.12893	1.44539	1.12263	1.86094	0.00427398	16187	1036	15151	FALSE
submucosal	721.1	Spondylosis without myelopathy	0.309178	0.108288	1.36231	1.10179	1.68442	0.00430167	15947	1039	14908	FALSE
submucosal	340	Migraine	0.276909	0.0972557	1.31905	1.09012	1.59605	0.00441023	16704	1093	15611	FALSE
submucosal	261.2	Vitamin B-complex deficiencies	0.389135	0.137236	1.4757	1.12767	1.93116	0.00457531	14961	943	14018	FALSE
submucosal	681.1	Cellulitis and abscess of fingers/toes	0.591567	0.210428	1.80682	1.19617	2.72919	0.00493491	15631	1020	14611	FALSE
submucosal	555	Inflammatory bowel disease and other gastroenteritis and colitis	0.528726	0.188591	1.69677	1.17244	2.45559	0.00505428	12976	824	12152	FALSE
submucosal	706.2	Sebaceous cyst	0.423813	0.151213	1.52778	1.13591	2.05483	0.00506688	16261	1043	15218	FALSE
submucosal	702.2	Seborrheic keratosis	0.293838	0.10505	1.34157	1.09192	1.64829	0.00515582	17297	1127	16170	FALSE
submucosal	530.1	Esophagitis, GERD and related diseases	0.219169	0.0785431	1.24504	1.0674	1.45225	0.00526372	16241	1052	15189	FALSE
submucosal	300.9	Posttraumatic stress disorder	0.508284	0.182206	1.66244	1.16318	2.37597	0.00527707	11478	679	10799	FALSE
submucosal	327.71	Restless legs syndrome	0.493292	0.177218	1.6377	1.15713	2.31785	0.0053771	14708	932	13776	FALSE
submucosal	173	Neoplasm of uncertain behavior of skin	0.301828	0.108476	1.35233	1.09331	1.6727	0.00539537	16983	1113	15870	FALSE
submucosal	798.1	Chronic fatigue syndrome	0.429209	0.154761	1.53604	1.13414	2.08036	0.00554797	17990	1186	16804	FALSE
submucosal	293	Symptoms involving head and neck	1.0868	0.393926	2.96477	1.36986	6.41664	0.00579968	17426	1151	16275	FALSE
submucosal	293.1	Swelling, mass, or lump in head and neck [Space-occupying lesion, intracranial NOS]	0.460905	0.167188	1.58551	1.1425	2.2003	0.00583687	17776	1185	16591	FALSE
submucosal	610.3	Fibrosclerosis of breast	0.798612	0.290318	2.22245	1.25808	3.92606	0.00594473	13764	780	12984	FALSE
submucosal	728.7	Fasciitis	0.444473	0.162833	1.55967	1.13351	2.14604	0.00634054	13538	812	12726	FALSE
submucosal	110	Dermatophytosis / Dermatomycosis	0.386271	0.141766	1.47148	1.11451	1.9428	0.00643569	16042	1025	15017	FALSE
submucosal	78	Viral warts & HPV	0.424483	0.156504	1.5288	1.12495	2.07764	0.00668223	15024	942	14082	FALSE
submucosal	740.11	Osteoarthrosis, localized, primary	0.246817	0.0914218	1.27994	1.06997	1.53113	0.00693901	16653	1085	15568	FALSE
submucosal	613.5	Mastodynia	0.345048	0.128186	1.41206	1.09834	1.81538	0.00710749	16136	1002	15134	FALSE
submucosal	395.3	Nonrheumatic tricuspid valve disorders	0.891084	0.331412	2.43777	1.27318	4.66763	0.0071721	17003	1118	15885	FALSE
submucosal	514.2	Solitary pulmonary nodule	0.405047	0.151258	1.49937	1.11469	2.0168	0.00740971	17762	1187	16575	FALSE
submucosal	444.1	Arterial embolism and thrombosis of lower extremity artery	1.57082	0.586684	4.81058	1.52336	15.1912	0.00741848	16810	1109	15701	FALSE
submucosal	735.23	Hallux rigidus	0.879952	0.328994	2.41078	1.26506	4.59413	0.0074802	16183	1031	15152	FALSE
submucosal	530.11	GERD	0.212574	0.0797157	1.23686	1.05795	1.44602	0.00766112	16128	1042	15086	FALSE
submucosal	483	Acute bronchitis and bronchiolitis	0.348336	0.130674	1.41671	1.0966	1.83026	0.00768321	15445	1004	14441	FALSE
submucosal	325	Phlebitis and thrombophlebitis of intracranial venous sinuses	1.35687	0.51107	3.88404	1.42643	10.5759	0.00793163	18282	1228	17054	FALSE
submucosal	729	Other disorders of soft tissues	0.445292	0.167951	1.56095	1.12312	2.16945	0.00801755	13511	809	12702	FALSE
submucosal	763	Thoracic or lumbosacral neuritis or radiculitis, unspecified	0.326372	0.123391	1.38593	1.0882	1.76512	0.00816829	16435	1084	15351	FALSE
submucosal	172.21	Basal cell carcinoma	0.456261	0.172871	1.57816	1.12461	2.21464	0.0083075	16165	1042	15123	FALSE
submucosal	737	Curvature of spine	0.50717	0.192249	1.66058	1.13924	2.42051	0.00833751	16402	1052	15350	FALSE
submucosal	741.5	Hemarthrosis	1.82203	0.692646	6.1844	1.59113	24.0375	0.00852506	15582	968	14614	FALSE
submucosal	555.21	Ulcerative colitis (chronic)	0.82386	0.3138	2.27928	1.23221	4.21609	0.00865401	12751	803	11948	FALSE
submucosal	706.1	Acne	0.399386	0.152422	1.49091	1.10588	2.01	0.0087861	16265	1041	15224	FALSE
submucosal	634	Miscarriage; stillbirth	-0.455676	0.174373	0.634019	0.450478	0.892343	0.00896913	16408	1155	15253	FALSE
submucosal	1019	Other ill-defined and unknown causes of morbidity and mortality	0.575267	0.220194	1.77761	1.15452	2.73696	0.00898716	18436	1236	17200	FALSE
submucosal	1005	Other symptoms	2.61452	1.00275	13.6607	1.91386	97.5065	0.00912497	18436	1236	17200	FALSE
submucosal	586	Other disorders of the kidney and ureters	0.327294	0.126873	1.38721	1.0818	1.77885	0.00988837	16702	1109	15593	FALSE
submucosal	703.1	Ingrowing nail	0.640636	0.248724	1.89769	1.16548	3.08989	0.010004	16121	1008	15113	FALSE
submucosal	569.1	Toxic gastroenteritis and colitis	1.06321	0.416919	2.89566	1.27897	6.55596	0.0107672	15247	948	14299	FALSE
submucosal	374.6	Dermatochalasis	0.476758	0.18709	1.61084	1.11635	2.32438	0.0108255	15502	1018	14484	FALSE
submucosal	578	Gastrointestinal hemorrhage	0.300099	0.117901	1.34999	1.07145	1.70094	0.0109169	15459	982	14477	FALSE
submucosal	365.5	Pseudoexfoliation glaucoma	2.55918	1.00603	12.9252	1.79924	92.8513	0.010964	16959	1130	15829	FALSE
submucosal	611.11	Mammographic microcalcification	0.503777	0.199785	1.65496	1.11873	2.44821	0.0116824	13955	796	13159	FALSE
submucosal	540	Appendiceal conditions	0.657633	0.261789	1.93022	1.15549	3.22437	0.0120024	18309	1222	17087	FALSE
submucosal	635.2	Antepartum hemorrhage, abruptio placentae, and placenta previa	-0.816235	0.325293	0.442093	0.233678	0.836389	0.0120994	15957	1128	14829	FALSE
submucosal	425.8	Other cardiomyopathy	1.15701	0.461241	3.18042	1.28786	7.85416	0.0121253	17833	1193	16640	FALSE
submucosal	386.9	Dizziness and giddiness (Light-headedness and vertigo)	0.240029	0.0962902	1.27129	1.05264	1.53535	0.0126754	16691	1091	15600	FALSE
submucosal	382	Otalgia	0.38406	0.154141	1.46823	1.08539	1.98611	0.0127167	15514	995	14519	FALSE
submucosal	276.13	Hyperpotassemia	0.402141	0.16161	1.49502	1.08914	2.05217	0.012834	15426	1022	14404	FALSE
submucosal	258.1	Postablative ovarian failure	0.898444	0.362409	2.45578	1.20698	4.99664	0.0131717	16003	1030	14973	FALSE
submucosal	289.4	Lymphadenitis	0.321951	0.129917	1.37982	1.06963	1.77996	0.0132078	15854	1011	14843	FALSE
submucosal	727	Other disorders of synovium, tendon, and bursa	0.273241	0.110601	1.31422	1.05809	1.63235	0.0134921	14429	879	13550	FALSE
submucosal	614.54	Abscess or ulceration of vulva	1.01527	0.412189	2.7601	1.23045	6.19138	0.0137736	13038	704	12334	FALSE
submucosal	199	Neoplasm of uncertain behavior	0.327397	0.132976	1.38735	1.06904	1.80044	0.0138135	16902	1117	15785	FALSE
submucosal	724	Other and unspecified disorders of back	0.361536	0.147521	1.43553	1.07508	1.91684	0.0142563	15257	979	14278	FALSE
submucosal	415.1	Acute pulmonary heart disease	0.494266	0.203114	1.63929	1.10094	2.44091	0.0149561	17540	1161	16379	FALSE
submucosal	939	Atopic/contact dermatitis due to other or unspecified	0.273484	0.113597	1.31454	1.05215	1.64236	0.0160624	15904	991	14913	FALSE
submucosal	625	Pain and other symptoms associated with female genital organs	0.3466	0.144083	1.41425	1.0663	1.87574	0.0161482	16374	1042	15332	FALSE
submucosal	260.3	Adult failure to thrive	0.674186	0.280347	1.96244	1.13281	3.39963	0.0161802	14398	893	13505	FALSE
submucosal	738.4	Acquired spondylolisthesis	0.459142	0.192409	1.58272	1.08548	2.30773	0.0170194	16421	1052	15369	FALSE
submucosal	727.6	Rupture of tendon, nontraumatic	0.694407	0.2916	2.00252	1.13074	3.54644	0.0172484	13176	780	12396	FALSE
submucosal	612.2	Hypertrophy of breast (Gynecomastia)	0.601682	0.25352	1.82519	1.11047	2.99991	0.0176294	13823	784	13039	FALSE
submucosal	172	Skin cancer	0.315119	0.133734	1.37042	1.05443	1.78111	0.0184578	16540	1071	15469	FALSE
submucosal	783.1	Postprocedural fever	1.05748	0.448991	2.87911	1.19418	6.94139	0.0185107	15213	978	14235	FALSE
submucosal	246	Other disorders of thyroid	0.45589	0.193722	1.57758	1.07917	2.30616	0.0186069	14464	922	13542	FALSE
submucosal	367.2	Astigmatism	0.41028	0.174455	1.50724	1.07074	2.12169	0.0186838	16712	1095	15617	FALSE
submucosal	614.53	Cyst or abscess of Bartholin's gland	0.965248	0.410844	2.62544	1.1735	5.87381	0.0188024	13040	704	12336	FALSE
submucosal	795	Other and nonspecific abnormal cytological, histological and immunological findings	0.593179	0.253238	1.80973	1.10168	2.97286	0.0191612	18222	1224	16998	FALSE
submucosal	444	Arterial embolism and thrombosis	0.848165	0.364576	2.33536	1.14293	4.77185	0.019995	16854	1114	15740	FALSE
submucosal	272.12	Hyperglyceridemia	0.592245	0.254574	1.80804	1.09777	2.97788	0.0199963	13761	854	12907	FALSE
submucosal	564	Functional digestive disorders	0.308105	0.132498	1.36084	1.0496	1.76438	0.0200528	13459	862	12597	FALSE
submucosal	272.14	Hyperchylomicronemia	2.01415	0.867157	7.49436	1.36961	41.0084	0.0201949	13609	838	12771	FALSE
submucosal	153	Colorectal cancer	0.532796	0.229389	1.70369	1.08675	2.67085	0.0201965	15859	988	14871	FALSE
submucosal	415	Pulmonary heart disease	0.414636	0.179212	1.51382	1.06543	2.15091	0.020686	17642	1169	16473	FALSE
submucosal	687.4	Disturbance of skin sensation	0.270126	0.116833	1.31013	1.04199	1.64727	0.0207741	14904	956	13948	FALSE
submucosal	842	Other sprains and strains	0.584259	0.253692	1.79366	1.09092	2.94909	0.0212775	15530	987	14543	FALSE
submucosal	285.2	Anemia of chronic disease	0.375122	0.1631	1.45517	1.05701	2.00331	0.0214509	13786	763	13023	FALSE
submucosal	782.6	Pallor and flushing	0.451464	0.196394	1.57061	1.0688	2.30803	0.0215181	15940	1035	14905	FALSE
submucosal	415.11	Pulmonary embolism and infarction, acute	0.474185	0.206504	1.6067	1.0719	2.40833	0.0216614	17535	1160	16375	FALSE
submucosal	327.32	Obstructive sleep apnea	0.239763	0.104692	1.27095	1.03517	1.56042	0.0220107	15769	1014	14755	FALSE
submucosal	379.3	Aphakia and other disorders of lens	1.52537	0.668766	4.59686	1.23936	17.0501	0.0225557	15845	1030	14815	FALSE
submucosal	764	Sciatica	0.290918	0.127557	1.33765	1.04175	1.7176	0.0225671	16396	1077	15319	FALSE
submucosal	228.1	Hemangioma of skin and subcutaneous tissue	0.360941	0.159266	1.43468	1.04999	1.96031	0.0234346	17559	1166	16393	FALSE
submucosal	70.9	Hepatitis NOS	0.769148	0.342007	2.15793	1.10386	4.21851	0.0245173	14601	903	13698	FALSE
submucosal	689	Disorder of skin and subcutaneous tissue NOS	0.348623	0.155112	1.41711	1.04561	1.92061	0.0246049	17475	1145	16330	FALSE
submucosal	645	Late pregnancy and failed induction	-1.30407	0.584776	0.271425	0.0862738	0.853929	0.0257454	18252	1234	17018	FALSE
submucosal	512.9	Other dyspnea	0.231036	0.103605	1.25991	1.02837	1.54358	0.0257486	12745	789	11956	FALSE
submucosal	573.3	Hepatomegaly	0.596335	0.268523	1.81545	1.07254	3.07296	0.0263647	15561	1024	14537	FALSE
submucosal	617	Disorders secondary to childbirth, surgery, trauma	0.385011	0.173544	1.46963	1.04589	2.06505	0.0265192	17661	1149	16512	FALSE
submucosal	578.8	Hemorrhage of rectum and anus	0.392181	0.177293	1.48021	1.0457	2.09525	0.0269628	14834	930	13904	FALSE
submucosal	184.11	Malignant neoplasm of ovary	0.506968	0.229951	1.66025	1.05788	2.60562	0.0274763	14964	954	14010	FALSE
submucosal	256.4	Polycystic ovaries	0.340727	0.15518	1.40597	1.03725	1.90576	0.0281142	16485	1070	15415	FALSE
submucosal	782.3	Edema	0.241501	0.110241	1.27316	1.02575	1.58023	0.028476	16881	1110	15771	FALSE
submucosal	54	Herpes simplex	0.376517	0.17228	1.4572	1.03961	2.04252	0.0288529	14953	932	14021	FALSE
submucosal	327.7	Sleep related movement disorders	0.359434	0.1645	1.43252	1.03771	1.97754	0.0288879	14817	938	13879	FALSE
submucosal	211	Benign neoplasm of other parts of digestive system	0.489217	0.224131	1.63104	1.05119	2.53075	0.029056	17593	1161	16432	FALSE
submucosal	300.8	Acute reaction to stress	0.706893	0.325641	2.02768	1.07105	3.83876	0.0299483	11206	654	10552	FALSE
submucosal	614.51	Cervicitis and endocervicitis	0.642093	0.296936	1.90045	1.06194	3.40106	0.030588	13114	710	12404	FALSE
submucosal	327.3	Sleep apnea	0.212823	0.0987358	1.23717	1.01949	1.50132	0.031124	16010	1031	14979	FALSE
submucosal	153.2	Colon cancer	0.559869	0.260068	1.75044	1.05141	2.91422	0.0313362	15805	983	14822	FALSE
submucosal	624.9	stress incontinence, female	0.300698	0.139896	1.3508	1.02686	1.77694	0.0316001	16435	1047	15388	FALSE
submucosal	290.3	Other persistent mental disorders due to conditions classified elsewhere	0.821651	0.384754	2.27425	1.06987	4.83446	0.0327184	16972	1117	15855	FALSE
submucosal	172.2	Other non-epithelial cancer of skin	0.312167	0.146188	1.36638	1.02597	1.81974	0.0327297	16407	1059	15348	FALSE
submucosal	571.5	Other chronic nonalcoholic liver disease	0.246979	0.115941	1.28015	1.01993	1.60676	0.033154	16477	1098	15379	FALSE
submucosal	250.41	Impaired fasting glucose	0.379005	0.178629	1.46083	1.02931	2.07325	0.0338587	15659	1033	14626	FALSE
submucosal	364.5	Corneal dystrophy	0.882926	0.41635	2.41796	1.06917	5.46832	0.0339529	16999	1135	15864	FALSE
submucosal	175	Acquired absence of breast	0.455716	0.214925	1.5773	1.03506	2.4036	0.0339763	13403	779	12624	FALSE
submucosal	256	Ovarian dysfunction	0.312751	0.147642	1.36718	1.02365	1.826	0.0341495	16551	1075	15476	FALSE
submucosal	242	Thyrotoxicosis with or without goiter	0.428178	0.202898	1.53446	1.03097	2.28384	0.0348314	14445	919	13526	FALSE
submucosal	686.4	Pyogenic granuloma	1.40884	0.669845	4.09121	1.1007	15.2067	0.0354454	15424	996	14428	FALSE
submucosal	704.8	Other specified diseases of hair and hair follicles	0.533943	0.254219	1.70564	1.03632	2.80727	0.0357003	16123	1007	15116	FALSE
submucosal	742.9	Other derangement of joint	0.425228	0.203226	1.52994	1.02727	2.27858	0.0364032	15856	993	14863	FALSE
submucosal	244	Hypothyroidism	0.177808	0.085002	1.1946	1.01127	1.41116	0.0364557	16602	1081	15521	FALSE
submucosal	275.3	Disorders of magnesium metabolism	0.431596	0.206505	1.53971	1.02721	2.30792	0.0366179	17385	1149	16236	FALSE
submucosal	531.4	Peptic ulcer, site unspecified	1.03494	0.495607	2.81492	1.06561	7.43594	0.0367782	17893	1200	16693	FALSE
submucosal	274	Gout and other crystal arthropathies	0.482018	0.230845	1.61934	1.03	2.54588	0.0367925	18280	1226	17054	FALSE
submucosal	727.4	Ganglion and cyst of synovium, tendon, and bursa	0.420663	0.202204	1.52297	1.02464	2.26366	0.03749	13364	795	12569	FALSE
submucosal	367	Disorders of refraction and accommodation; blindness and low vision	0.209108	0.100518	1.23258	1.01217	1.50099	0.0374971	17821	1183	16638	FALSE
submucosal	315	Develomental delays and disorders	0.753422	0.362432	2.12426	1.044	4.32231	0.0376362	17781	1183	16598	FALSE
submucosal	193	Thyroid cancer	0.496855	0.23952	1.64354	1.02778	2.62824	0.0380439	18042	1203	16839	FALSE
submucosal	728	Disorders of muscle, ligament, and fascia	0.743395	0.359398	2.10306	1.03974	4.25381	0.0385985	13134	775	12359	FALSE
submucosal	743.12	Senile osteoporosis	-1.48038	0.715778	0.22755	0.0559493	0.925463	0.0386194	16361	1073	15288	FALSE
submucosal	228	Hemangioma and lymphangioma, any site	0.301813	0.145981	1.35231	1.01581	1.80027	0.0386891	17683	1175	16508	FALSE
submucosal	765	Cervical radiculitis	0.315255	0.15268	1.37061	1.01613	1.84875	0.0389404	16111	1053	15058	FALSE
submucosal	270	Disorders of protein plasma/amino-acid transport and metabolism	-1.04656	0.507978	0.351143	0.129743	0.95035	0.0393746	17931	1193	16738	FALSE
submucosal	742	Derangement of joint, non-traumatic	0.380429	0.184767	1.46291	1.01845	2.10133	0.0394975	15931	999	14932	FALSE
submucosal	217.1	Nevus, non-neoplastic	0.462385	0.225093	1.58786	1.02143	2.46839	0.0399569	15258	945	14313	FALSE
submucosal	217	Vascular hamartomas and non-neoplastic nevi	0.44234	0.21584	1.55634	1.01948	2.37593	0.0404245	15283	947	14336	FALSE
submucosal	527.1	Hypertrophy of salivary gland	1.76858	0.867974	5.86253	1.06967	32.1307	0.0415902	17266	1160	16106	FALSE
submucosal	528.1	Stomatitis and mucositis	-2.04215	1.00251	0.129749	0.0181865	0.92568	0.0416467	17362	1159	16203	FALSE
submucosal	174	Breast cancer	0.270288	0.13401	1.31034	1.00766	1.70395	0.0437031	14683	888	13795	FALSE
submucosal	394.2	Mitral valve disease	0.72741	0.361077	2.06971	1.01989	4.20015	0.043951	16998	1116	15882	FALSE
submucosal	475.9	Postnasal drip	0.420098	0.208601	1.52211	1.0113	2.29092	0.0440214	12153	739	11414	FALSE
submucosal	695.8	Other specified erythematous conditions	0.495598	0.246362	1.64148	1.01281	2.66037	0.0442548	14963	910	14053	FALSE
submucosal	327.1	Hypersomnia	0.460675	0.229161	1.58514	1.01159	2.4839	0.0444026	14560	916	13644	FALSE
submucosal	430.2	Intracerebral hemorrhage	0.823496	0.410359	2.27845	1.01938	5.09266	0.0447741	17261	1141	16120	FALSE
submucosal	278.11	Morbid obesity	0.199708	0.0996341	1.22105	1.00443	1.48437	0.0450258	15312	973	14339	FALSE
submucosal	259.8	Polyglandular activity in multiple endocrine adenomatosis	1.30807	0.65369	3.69904	1.0272	13.3205	0.0453861	15955	1024	14931	FALSE
submucosal	79	Viral infection	0.336427	0.16875	1.39994	1.00569	1.94873	0.0461916	14983	934	14049	FALSE
submucosal	612.1	Galactorrhea	0.810686	0.407152	2.24945	1.01275	4.99633	0.0464683	13709	773	12936	FALSE
submucosal	284	Aplastic anemia	0.51396	0.25857	1.6719	1.00719	2.77529	0.0468444	13426	735	12691	FALSE
submucosal	635.3	Placenta previa and abruptio placenta	-1.16263	0.587338	0.312664	0.0988838	0.988621	0.0477614	15797	1121	14676	FALSE
submucosal	427.5	Arrhythmia (cardiac) NOS	0.269395	0.136662	1.30917	1.00154	1.7113	0.048695	14321	923	13398	FALSE
submucosal	800.4	Fracture of patella	0.711991	0.361436	2.03805	1.00358	4.1388	0.0488505	16385	1091	15294	FALSE
submucosal	580.14	Chronic glomerulonephritis, NOS	1.65573	0.840592	5.23689	1.0082	27.2019	0.048871	15876	1035	14841	FALSE
submucosal	456	Chronic venous insufficiency [CVI]	0.43052	0.220977	1.53806	0.997408	2.37177	0.0513846	15025	953	14072	FALSE
submucosal	372	Disorders of conjunctiva	0.6073	0.311963	1.83547	0.99586	3.38295	0.0515704	15280	995	14285	FALSE
submucosal	722.1	Displacement of intervertebral disc	0.3554	0.182922	1.42675	0.996878	2.04199	0.0520277	15042	959	14083	FALSE
submucosal	10	Tuberculosis	1.62624	0.837917	5.08474	0.984055	26.2735	0.0522804	15972	1044	14928	FALSE
submucosal	588	Disorders resulting from impaired renal function	0.502881	0.260755	1.65348	0.991835	2.7565	0.0537856	16025	1050	14975	FALSE
submucosal	174.1	Breast cancer [female]	0.265218	0.137577	1.30372	0.995577	1.70722	0.0538828	14639	884	13755	FALSE
submucosal	733.9	Chondromalacia	0.943024	0.489183	2.56773	0.98435	6.69808	0.0538857	14730	927	13803	FALSE
submucosal	761	Cervicalgia	0.179029	0.0932225	1.19606	0.99632	1.43583	0.0548007	17310	1129	16181	FALSE
submucosal	564.1	Irritable Bowel Syndrome	0.282937	0.147489	1.32702	0.993877	1.77183	0.0550658	13303	847	12456	FALSE
submucosal	701.2	Scar conditions and fibrosis of skin	0.33121	0.172877	1.39265	0.9924	1.95433	0.0553817	16370	1037	15333	FALSE
submucosal	459.1	Hemorrhage NOS	0.691383	0.361076	1.99648	0.983806	4.05152	0.05552	16814	1126	15688	FALSE
submucosal	771.1	Swelling of limb	0.290962	0.152004	1.33771	0.993059	1.80198	0.0555976	16837	1096	15741	FALSE
submucosal	274.1	Gout	0.51315	0.269085	1.67054	0.985845	2.83079	0.056518	18222	1220	17002	FALSE
submucosal	158	Neoplasm of unspecified nature of digestive system	0.5634	0.296838	1.75664	0.981767	3.14308	0.057695	17351	1139	16212	FALSE
submucosal	563	Constipation	0.240824	0.127347	1.2723	0.991262	1.63301	0.058613	17497	1153	16344	FALSE
submucosal	504	Other alveolar and parietoalveolar pneumonopathy	0.678724	0.359795	1.97136	0.973873	3.99052	0.0592384	16109	1069	15040	FALSE
submucosal	782	Symptoms involving skin and other integumentary tissue	0.925088	0.490718	2.52209	0.963948	6.59885	0.0594063	15681	1010	14671	FALSE
submucosal	255.12	Hyperaldosteronism	1.2158	0.647271	3.37299	0.948521	11.9945	0.0603337	15956	1024	14932	FALSE
submucosal	580.31	Nephritis and nephropathy in diseases classified elsewhere	0.916451	0.489038	2.5004	0.95881	6.52059	0.0609319	15901	1038	14863	FALSE
submucosal	588.1	Renal osteodystrophy	0.557904	0.297997	1.74701	0.97417	3.13296	0.0611815	15982	1046	14936	FALSE
submucosal	281.13	Folate-deficiency anemia	1.50765	0.805616	4.51611	0.93113	21.9038	0.061286	13249	720	12529	FALSE
submucosal	149.3	Cancer of hypopharynx	2.64611	1.41811	14.0991	0.875126	227.148	0.0620497	18247	1223	17024	FALSE
submucosal	225.2	Benign neoplasm of spinal cord, meninges	1.52663	0.819811	4.60265	0.922934	22.9533	0.0625784	18040	1207	16833	FALSE
submucosal	365.1	Open-angle glaucoma	0.388282	0.208531	1.47445	0.979768	2.21888	0.0626053	17218	1155	16063	FALSE
submucosal	528.4	Cysts of oral soft tissues	1.5602	0.838581	4.75975	0.919962	24.6263	0.0628122	17267	1160	16107	FALSE
submucosal	174.11	Malignant neoplasm of female breast	0.263097	0.141625	1.30095	0.985617	1.71718	0.0632112	14590	880	13710	FALSE
submucosal	737.3	Kyphoscoliosis and scoliosis	0.399728	0.215211	1.49142	0.978157	2.274	0.0632571	16360	1045	15315	FALSE
submucosal	702.1	Actinic keratosis	0.274828	0.148478	1.3163	0.983941	1.76093	0.0641743	16542	1060	15482	FALSE
submucosal	568	Other disorders of peritoneum	0.4016	0.217082	1.49421	0.976403	2.28663	0.0643144	15470	965	14505	FALSE
submucosal	755.1	Congenital deformities of feet	1.01523	0.551888	2.76	0.93569	8.14114	0.0658332	18081	1215	16866	FALSE
submucosal	644	Anemia during pregnancy	-0.570886	0.311348	0.565024	0.306932	1.04014	0.0667144	18012	1222	16790	FALSE
submucosal	472	Chronic pharyngitis and nasopharyngitis	0.2713	0.147969	1.31167	0.981455	1.75298	0.0667296	12531	769	11762	FALSE
submucosal	284.1	Pancytopenia	0.500231	0.274726	1.6491	0.96249	2.82552	0.0686317	13406	733	12673	FALSE
submucosal	416	Cardiomegaly	0.318089	0.175062	1.3745	0.975278	1.93714	0.0692165	17689	1171	16518	FALSE
submucosal	270.3	Disorders of plasma protein metabolism	-1.06305	0.586408	0.345402	0.109437	1.09015	0.0698609	17894	1192	16702	FALSE
submucosal	540.1	Appendicitis	0.559419	0.309073	1.74965	0.954693	3.20657	0.070298	18278	1217	17061	FALSE
submucosal	427.9	Palpitations	0.179231	0.0990555	1.1963	0.985193	1.45264	0.0703887	15247	993	14254	FALSE
submucosal	855	Complication of nervous system device, implant, and graft	0.998172	0.552082	2.71332	0.919515	8.00649	0.0706045	17356	1146	16210	FALSE
submucosal	275	Disorders of mineral metabolism	0.235995	0.130569	1.26617	0.980276	1.63544	0.070695	17944	1192	16752	FALSE
submucosal	704.12	Telogen effluvium	0.738836	0.408885	2.0935	0.939339	4.66576	0.0707695	16017	996	15021	FALSE
submucosal	706.8	Other specified diseases of sebaceous glands	0.485719	0.270631	1.62534	0.956267	2.76256	0.0726915	15884	1006	14878	FALSE
submucosal	875	Non-healing surgical wound	1.14967	0.642776	3.15715	0.89568	11.1285	0.0736793	16695	1085	15610	FALSE
submucosal	735.21	Hammer toe (acquired)	0.421786	0.236049	1.52468	0.959954	2.42163	0.0739606	16317	1041	15276	FALSE
submucosal	597	Other disorders of urethra and urinary tract	0.510744	0.286424	1.66653	0.950614	2.92161	0.074558	16864	1116	15748	FALSE
submucosal	184	Cancer of other female genital organs	0.328937	0.184782	1.38949	0.967311	1.99593	0.0750533	15142	966	14176	FALSE
submucosal	244.2	Acquired hypothyroidism	0.300514	0.170392	1.35055	0.9671	1.88604	0.0777882	14610	931	13679	FALSE
submucosal	184.1	Malignant neoplasm of ovary and other uterine adnexa	0.403459	0.228848	1.49699	0.955919	2.34433	0.0778997	14986	954	14032	FALSE
submucosal	735.22	Claw toe (acquired)	2.49428	1.41566	12.113	0.755477	194.215	0.0780819	16109	1021	15088	FALSE
submucosal	244.4	Hypothyroidism NOS	0.157605	0.0897197	1.1707	0.98192	1.39578	0.0789797	16338	1058	15280	FALSE
submucosal	190	Cancer of eye	1.11625	0.638219	3.05337	0.874012	10.667	0.0802903	18049	1208	16841	FALSE
submucosal	571	Chronic liver disease and cirrhosis	0.202354	0.115754	1.22428	0.975775	1.53608	0.0804395	16523	1098	15425	FALSE
submucosal	562.2	Diverticulitis	0.366472	0.209803	1.44264	0.956244	2.17643	0.0806821	12949	818	12131	FALSE
submucosal	370.1	Corneal ulcer	0.850388	0.48774	2.34055	0.8998	6.08824	0.0812417	15216	988	14228	FALSE
submucosal	612.3	Congenital anomalies of breast	1.37688	0.792382	3.96252	0.838459	18.7267	0.0822734	13663	768	12895	FALSE
submucosal	250.4	Abnormal glucose	0.225681	0.130063	1.25318	0.971182	1.61705	0.08271	16135	1068	15067	FALSE
submucosal	427	Cardiac dysrhythmias	0.132866	0.076638	1.1421	0.982805	1.32721	0.0829743	16926	1112	15814	FALSE
submucosal	452.1	Iatrogenic pulmonary embolism and infarction	1.39329	0.803767	4.0281	0.833528	19.4662	0.0830146	14799	931	13868	FALSE
submucosal	165.1	Cancer of bronchus; lung	0.513777	0.296424	1.67159	0.934996	2.98849	0.0830509	18353	1229	17124	FALSE
submucosal	427.11	Paroxysmal supraventricular tachycardia	0.36564	0.211499	1.44144	0.952278	2.18186	0.0838445	13831	883	12948	FALSE
submucosal	532	Dysphagia	0.220786	0.127745	1.24706	0.970839	1.60186	0.0839294	13979	872	13107	FALSE
submucosal	286.3	Coagulation defects complicating pregnancy or postpartum	-1.23571	0.715845	0.29063	0.0714497	1.18217	0.084308	16669	1088	15581	FALSE
submucosal	475	Chronic sinusitis	0.202586	0.11793	1.22457	0.971847	1.543	0.085824	13068	807	12261	FALSE
submucosal	850	Hemorrhage or hematoma complicating a procedure	0.473499	0.275741	1.6056	0.935238	2.75647	0.0859453	17473	1157	16316	FALSE
submucosal	365	Glaucoma	0.268351	0.156365	1.30781	0.962592	1.77682	0.0861296	17488	1177	16311	FALSE
submucosal	394	Rheumatic disease of the heart valves	0.337639	0.19716	1.40163	0.952377	2.06282	0.086802	17253	1137	16116	FALSE
submucosal	481	Influenza	0.371416	0.218432	1.44979	0.944867	2.22453	0.0890611	14937	955	13982	FALSE
submucosal	495.2	Asthma with exacerbation	0.308601	0.181684	1.36152	0.953611	1.94391	0.0894022	15382	979	14403	FALSE
submucosal	596.1	Bladder neck obstruction	1.36409	0.803933	3.91216	0.809272	18.912	0.0897404	16749	1104	15645	FALSE
submucosal	803.1	Fracture of humerus	-0.988654	0.586242	0.372077	0.117927	1.17396	0.0917139	16426	1085	15341	FALSE
submucosal	301	Personality disorders	-1.20621	0.71695	0.299331	0.0734296	1.2202	0.0924889	11211	645	10566	FALSE
submucosal	165	Cancer within the respiratory system	0.498166	0.296167	1.6457	0.920976	2.94072	0.0925602	18355	1229	17126	FALSE
submucosal	726.4	Calcaneal spur; Exostosis NOS	0.478834	0.286449	1.61419	0.920714	2.82999	0.0945989	13201	780	12421	FALSE
submucosal	871	Open wounds of extremities	0.270982	0.162511	1.31125	0.953572	1.80309	0.095422	17168	1126	16042	FALSE
submucosal	8	Intestinal infection	0.377399	0.227179	1.45849	0.934381	2.27657	0.0966648	18032	1207	16825	FALSE
submucosal	184.2	Cancer of other female genital organs (excluding uterus and ovary)	0.53373	0.32139	1.70528	0.908287	3.20161	0.0967753	14846	943	13903	FALSE
submucosal	509	Respiratory failure, insufficiency, arrest	-0.333771	0.201103	0.716218	0.482906	1.06225	0.0969741	16592	1087	15505	FALSE
submucosal	716	Other arthropathies	0.314167	0.189384	1.36912	0.944569	1.98449	0.0971393	16843	1111	15732	FALSE
submucosal	654.2	Rhesus isoimmunization in pregnancy	-1.67284	1.01072	0.187712	0.0258909	1.36094	0.0979052	15173	1143	14030	FALSE
submucosal	385.5	Tympanosclerosis and middle ear disease related to otitis media	1.05558	0.638265	2.87363	0.822487	10.04	0.0981635	15013	948	14065	FALSE
submucosal	579	Other symptoms involving abdomen and pelvis	0.180317	0.109209	1.1976	0.96683	1.48345	0.098715	15824	996	14828	FALSE
submucosal	691.3	Congenital pigmentary anomalies of skin	1.32548	0.805062	3.764	0.776902	18.2361	0.0996747	14789	893	13896	FALSE
submucosal	292.11	Aphasia	0.588502	0.357529	1.80129	0.893816	3.63009	0.0997587	16993	1118	15875	FALSE
submucosal	580.3	Nephritis and nephropathy without mention of glomerulonephritis	0.62465	0.379888	1.86759	0.886981	3.93233	0.100114	15934	1041	14893	FALSE
submucosal	835	Internal derangement of knee	0.256694	0.156161	1.29265	0.951818	1.75553	0.100222	17485	1159	16326	FALSE
submucosal	295.1	Schizophrenia	0.723306	0.440141	2.06124	0.869906	4.88409	0.10031	11163	649	10514	FALSE
submucosal	715.3	Spinal enthesopathy	0.902708	0.550443	2.46627	0.838483	7.25417	0.101013	16507	1074	15433	FALSE
submucosal	642.1	Preeclampsia and eclampsia	-0.533844	0.325855	0.586347	0.309586	1.11052	0.101362	17770	1211	16559	FALSE
submucosal	791	Gangrene	0.793322	0.484804	2.21073	0.854796	5.71753	0.10176	18379	1232	17147	FALSE
submucosal	681	Superficial cellulitis and abscess	0.187818	0.114828	1.20661	0.963439	1.51117	0.101915	16538	1087	15451	FALSE
submucosal	250	Diabetes mellitus	0.160759	0.0983358	1.1744	0.968526	1.42404	0.102093	16975	1128	15847	FALSE
submucosal	270.32	Paraproteinemia	-1.64191	1.00807	0.19361	0.0268433	1.39643	0.103364	17843	1190	16653	FALSE
submucosal	509.1	Respiratory failure	-0.360812	0.222004	0.69711	0.451157	1.07715	0.104109	16497	1082	15415	FALSE
submucosal	586.2	Cyst of kidney, acquired	0.329568	0.203446	1.39037	0.933153	2.0716	0.105247	16169	1061	15108	FALSE
submucosal	772.6	Facial weakness	0.656583	0.406104	1.92819	0.869896	4.27399	0.105925	15580	1005	14575	FALSE
submucosal	286.5	Hemorrhagic disorder due to intrinsic circulating anticoagulants	0.784136	0.485659	2.19051	0.84556	5.67476	0.106401	16606	1091	15515	FALSE
submucosal	274.2	Crystal arthropathies	0.61371	0.381912	1.84727	0.873858	3.905	0.108067	18144	1212	16932	FALSE
submucosal	306.1	Mental disorders durring/after pregnancy	-0.501414	0.313233	0.605674	0.3278	1.1191	0.109428	11418	654	10764	FALSE
submucosal	535.8	Other specified gastritis	0.605961	0.379234	1.83301	0.871676	3.85457	0.110075	16563	1086	15477	FALSE
submucosal	117.1	Histoplasmosis	0.771147	0.483009	2.16225	0.838996	5.5725	0.110366	15444	969	14475	FALSE
submucosal	647.1	Infections of genitourinary tract during pregnancy	-0.729846	0.457681	0.481983	0.196538	1.182	0.110788	17820	1204	16616	FALSE
submucosal	587	Kidney replaced by transpant	0.647354	0.406445	1.91048	0.861329	4.23756	0.111223	15925	1040	14885	FALSE
submucosal	690.1	Seborrheic dermatitis	0.348624	0.218896	1.41712	0.922736	2.17637	0.11124	15046	915	14131	FALSE
submucosal	286	Coagulation defects	0.251076	0.157684	1.28541	0.943663	1.75091	0.111325	17109	1132	15977	FALSE
submucosal	501	Pneumonitis due to inhalation of food or vomitus	-1.60181	1.00846	0.201532	0.0279208	1.45466	0.112202	16105	1061	15044	FALSE
submucosal	250.7	Diabetic retinopathy	-0.930058	0.58616	0.394531	0.125064	1.2446	0.112582	16992	1127	15865	FALSE
submucosal	287.31	Primary thrombocytopenia	0.760428	0.4813	2.13919	0.832835	5.49465	0.114119	16609	1091	15518	FALSE
submucosal	374	Other disorders of eyelids	0.248764	0.157623	1.28244	0.941598	1.74666	0.114515	15733	1032	14701	FALSE
submucosal	530.13	Barrett's esophagus	-1.58862	1.00809	0.204207	0.0283116	1.47292	0.115057	13105	795	12310	FALSE
submucosal	687.1	Rash and other nonspecific skin eruption	0.180275	0.115591	1.19755	0.95477	1.50206	0.118858	15027	959	14068	FALSE
submucosal	117	Mycoses	0.548079	0.355631	1.72993	0.861605	3.47334	0.123282	15490	973	14517	FALSE
submucosal	274.21	Chondrocalcinosis	0.628756	0.408472	1.87528	0.842106	4.17603	0.123734	18135	1211	16924	FALSE
submucosal	565	Anal and rectal conditions	0.238451	0.155535	1.26928	0.935758	1.72168	0.125252	15787	989	14798	FALSE
submucosal	300.4	Dysthymic disorder	0.368946	0.240897	1.44621	0.901936	2.31892	0.125633	11333	663	10670	FALSE
submucosal	401.21	Hypertensive heart disease	0.26627	0.174005	1.30509	0.927948	1.83551	0.125956	13047	825	12222	FALSE
submucosal	594.2	Calculus of lower urinary tract	0.975615	0.638352	2.6528	0.75915	9.27003	0.12643	16986	1130	15856	FALSE
submucosal	255.22	Mineralocorticoid deficiency	1.21124	0.792666	3.35765	0.710075	15.8769	0.126498	15951	1023	14928	FALSE
submucosal	931	Contact dermatitis and other eczema due to plants [except food]	0.514488	0.337311	1.67278	0.863604	3.24014	0.127193	14820	902	13918	FALSE
submucosal	650	Normal delivery	-1.09325	0.717129	0.335124	0.0821814	1.36659	0.127387	18325	1235	17090	FALSE
submucosal	315.3	Mental retardation	0.739558	0.485418	2.09501	0.809076	5.42478	0.127622	17753	1179	16574	FALSE
submucosal	841	Sprains and strains of back and neck	0.32832	0.21558	1.38863	0.910085	2.11882	0.127768	15633	994	14639	FALSE
submucosal	530.2	Esophageal bleeding (varices/hemorrhage)	-1.09234	0.717309	0.335432	0.0822278	1.36833	0.127803	13122	796	12326	FALSE
submucosal	578.2	Blood in stool	0.258882	0.170222	1.29548	0.927972	1.80854	0.128299	14918	933	13985	FALSE
submucosal	690	Erythematosquamous dermatosis	0.33191	0.218752	1.39363	0.907698	2.1397	0.129193	15050	915	14135	FALSE
submucosal	801	Fracture of ankle and foot	0.232929	0.153718	1.26229	0.933926	1.70611	0.129697	16868	1132	15736	FALSE
submucosal	1010	Other tests	-0.236218	0.156648	0.789609	0.580859	1.07338	0.131565	18436	1236	17200	FALSE
submucosal	195	Cancer, suspected or other	0.256345	0.170188	1.2922	0.925684	1.80383	0.132003	16664	1089	15575	FALSE
submucosal	972	Poisoning by agents primarily affecting the cardiovascular system	1.20871	0.804151	3.34916	0.692515	16.1973	0.132816	17826	1179	16647	FALSE
submucosal	420.2	Pericarditis	0.399601	0.266059	1.49123	0.885259	2.51199	0.133116	17963	1203	16760	FALSE
submucosal	691	Congenital anomalies of skin	0.568485	0.378966	1.76559	0.840056	3.71084	0.133589	14850	899	13951	FALSE
submucosal	276.12	Hyposmolality and/or hyponatremia	-0.310248	0.206874	0.733265	0.48884	1.09991	0.133693	15474	1002	14472	FALSE
submucosal	251.1	Hypoglycemia	0.440579	0.295189	1.55361	0.871105	2.77084	0.13556	13843	875	12968	FALSE
submucosal	320	Meningitis	0.654975	0.438929	1.92509	0.814382	4.55068	0.135644	18307	1229	17078	FALSE
submucosal	781	Symptoms involving nervous and musculoskeletal systems	0.504132	0.338706	1.65555	0.852373	3.21554	0.136644	18185	1215	16970	FALSE
submucosal	425.2	Secondary/extrinsic cardiomyopathies	0.602048	0.405049	1.82585	0.825432	4.03878	0.137185	17863	1194	16669	FALSE
submucosal	289.5	Diseases of spleen	0.595962	0.403253	1.81478	0.823317	4.00017	0.139438	15112	947	14165	FALSE
submucosal	385	Other disorders of middle ear and mastoid	0.646287	0.437363	1.90844	0.809819	4.49748	0.139491	15046	951	14095	FALSE
submucosal	209	Neuroendocrine tumors	0.594013	0.404525	1.81124	0.819668	4.00235	0.14199	18423	1235	17188	FALSE
submucosal	333.1	Essential tremor	0.393189	0.267774	1.4817	0.87665	2.50434	0.142005	16269	1076	15193	FALSE
submucosal	250.2	Type 2 diabetes	0.14727	0.100759	1.15867	0.951022	1.41165	0.143849	16907	1121	15786	FALSE
submucosal	8.5	Bacterial enteritis	0.448813	0.307074	1.56645	0.858086	2.85959	0.143856	17925	1197	16728	FALSE
submucosal	427.12	Paroxysmal ventricular tachycardia	0.495086	0.338814	1.64064	0.844518	3.18726	0.143952	13655	867	12788	FALSE
submucosal	698	Pruritus and related conditions	0.243351	0.167264	1.27552	0.918984	1.77037	0.145699	17655	1171	16484	FALSE
submucosal	379.1	Scleritis and episcleritis	0.589632	0.406168	1.80332	0.81346	3.99771	0.146587	15890	1034	14856	FALSE
submucosal	395	Heart valve disorders	0.208538	0.143846	1.23188	0.929229	1.63309	0.147134	17621	1165	16456	FALSE
submucosal	705.8	Hyperhidrosis	0.425091	0.294313	1.52973	0.859192	2.72358	0.148641	15873	1003	14870	FALSE
submucosal	362.2	Degeneration of macula and posterior pole of retina	-0.452709	0.313493	0.635903	0.343985	1.17555	0.148716	17124	1135	15989	FALSE
submucosal	362.6	Peripheral retinal degenerations	-1.45766	1.01012	0.232779	0.0321451	1.68568	0.149003	16942	1125	15817	FALSE
submucosal	496	Chronic airway obstruction	0.240232	0.167682	1.27154	0.915373	1.7663	0.151953	15499	986	14513	FALSE
submucosal	523.1	Gingivitis	0.312078	0.218224	1.36626	0.890795	2.09551	0.152694	17107	1129	15978	FALSE
submucosal	656	Other perinatal conditions of fetus or newborn	-1.02235	0.715286	0.359748	0.0885391	1.46172	0.152921	18308	1232	17076	FALSE
submucosal	364.51	Fuchs' dystrophy	0.775264	0.544176	2.17116	0.747276	6.30819	0.154256	16983	1132	15851	FALSE
submucosal	687.2	Localized superficial swelling, mass, or lump	0.292654	0.205695	1.33998	0.895379	2.00535	0.154806	18078	1208	16870	FALSE
submucosal	253.1	Pituitary hyperfunction	0.453471	0.320985	1.57376	0.838903	2.95235	0.15773	16047	1032	15015	FALSE
submucosal	716.9	Arthropathy NOS	0.305352	0.216318	1.3571	0.888135	2.0737	0.158071	16761	1103	15658	FALSE
submucosal	871.1	Open wound of hand except finger(s)	0.502588	0.356302	1.65299	0.822207	3.32324	0.158372	16759	1091	15668	FALSE
submucosal	277.7	Dysmetabolic syndrome X	0.400795	0.284603	1.49301	0.854681	2.60809	0.159055	17870	1191	16679	FALSE
submucosal	286.81	Primary hypercoagulable state	0.352019	0.250105	1.42194	0.870936	2.32153	0.159284	16762	1104	15658	FALSE
submucosal	558	Noninfectious gastroenteritis	0.225589	0.160288	1.25306	0.915235	1.71558	0.159308	13227	837	12390	FALSE
submucosal	345.3	Convulsions	0.278617	0.198497	1.3213	0.895443	1.94969	0.160427	16428	1089	15339	FALSE
submucosal	574	Cholelithiasis and cholecystitis	0.190456	0.13601	1.2098	0.9267	1.57939	0.161423	17703	1187	16516	FALSE
submucosal	740.9	Osteoarthrosis NOS	0.177032	0.126716	1.19367	0.931154	1.53019	0.162389	15423	979	14444	FALSE
submucosal	495.1	Chronic obstructive asthma	0.670711	0.48083	1.95563	0.762071	5.01853	0.163045	15037	949	14088	FALSE
submucosal	805	Fracture of vertebral column without mention of spinal cord injury	-0.401038	0.287581	0.669625	0.381099	1.17659	0.16316	16588	1095	15493	FALSE
submucosal	722.8	Postlaminectomy syndrome	0.470556	0.338314	1.60088	0.824862	3.10698	0.16426	14768	934	13834	FALSE
submucosal	334	Degenerative disease of the spinal cord	0.410695	0.295305	1.50786	0.845266	2.68987	0.164302	16240	1073	15167	FALSE
submucosal	512.1	Wheezing	0.268939	0.193389	1.30858	0.895741	1.91168	0.164329	11434	685	10749	FALSE
submucosal	586.12	Vesicoureteral reflux	1.0808	0.784004	2.94704	0.63391	13.7007	0.168029	15880	1035	14845	FALSE
submucosal	473.3	Paralysis/spasm of vocal cords or larynx	-1.39296	1.01071	0.248339	0.0342541	1.80043	0.168141	11933	713	11220	FALSE
submucosal	594.3	Calculus of ureter	-0.472979	0.343606	0.623143	0.317764	1.222	0.168662	17161	1136	16025	FALSE
submucosal	276.5	Hypovolemia	0.176474	0.129297	1.193	0.925938	1.5371	0.172292	15842	1047	14795	FALSE
submucosal	540.11	Acute appendicitis	0.51354	0.37668	1.6712	0.798714	3.49674	0.172777	18247	1213	17034	FALSE
submucosal	250.5	Glycosuria or Acetonuria	0.861317	0.631818	2.36627	0.685884	8.16356	0.172808	15308	999	14309	FALSE
submucosal	388	Other disorders of ear	0.649403	0.480949	1.9144	0.745831	4.91387	0.176935	16365	1076	15289	FALSE
submucosal	301.2	Antisocial/borderline personality disorder	-1.36175	1.01076	0.256211	0.0353366	1.85768	0.177895	11171	644	10527	FALSE
submucosal	172.22	Squamous cell carcinoma	0.386097	0.287011	1.47123	0.838245	2.58219	0.17855	15920	1016	14904	FALSE
submucosal	240	Simple and unspecified goiter	0.357632	0.267	1.42994	0.847311	2.41319	0.180425	14326	907	13419	FALSE
submucosal	735.1	Flat foot	0.450778	0.336576	1.56953	0.811468	3.03578	0.180471	16204	1030	15174	FALSE
submucosal	751.21	Cystic kidney disease	0.53863	0.403077	1.71366	0.777711	3.77598	0.181452	17584	1182	16402	FALSE
submucosal	371.2	Conjunctivitis, noninfectious	0.247359	0.185806	1.28064	0.889744	1.84327	0.183099	15561	1017	14544	FALSE
submucosal	394.7	Disease of tricuspid valve	0.426964	0.321896	1.5326	0.815502	2.88026	0.184706	17038	1118	15920	FALSE
submucosal	159.4	Malignant neoplasm of retroperitoneum and peritoneum	0.632289	0.476787	1.88191	0.73918	4.79125	0.184791	17280	1131	16149	FALSE
submucosal	512.2	Painful respiration	0.280517	0.211752	1.32381	0.874138	2.00481	0.185256	11368	679	10689	FALSE
submucosal	528	Diseases of the oral soft tissues, excluding lesions specific for gingiva and tongue	-0.333377	0.252231	0.7165	0.437032	1.17468	0.186264	17577	1175	16402	FALSE
submucosal	840.3	Joint/ligament sprain	0.300681	0.227562	1.35078	0.864728	2.11003	0.186396	15614	991	14623	FALSE
submucosal	836	Traumatic arthropathy	0.829377	0.628156	2.29189	0.669109	7.85038	0.186723	16977	1114	15863	FALSE
submucosal	285.21	Anemia in chronic kidney disease	0.362673	0.274795	1.43717	0.838681	2.46273	0.186903	13418	733	12685	FALSE
submucosal	713.5	Arthropathy associated with neurological disorders	0.828188	0.629232	2.28917	0.666906	7.85761	0.18811	16521	1081	15440	FALSE
submucosal	946	Anaphylactic shock NOS	0.705592	0.536665	2.02504	0.70732	5.79767	0.188587	14757	896	13861	FALSE
submucosal	470	Septal Deviations/Turbinate Hypertrophy	0.185223	0.141336	1.20349	0.912291	1.58763	0.190023	12666	774	11892	FALSE
submucosal	286.11	Von willebrand's disease	0.81807	0.625496	2.26612	0.665045	7.72175	0.190916	16592	1089	15503	FALSE
submucosal	803.21	Colles' fracture	-0.93775	0.71889	0.391508	0.0956772	1.60204	0.192083	16384	1084	15300	FALSE
submucosal	568.1	Peritoneal adhesions (postoperative) (postinfection)	0.415672	0.31884	1.51539	0.811189	2.83091	0.192335	15323	952	14371	FALSE
submucosal	286.8	Hypercoagulable state	0.31697	0.243143	1.37296	0.852492	2.21119	0.192359	16779	1105	15674	FALSE
submucosal	110.13	Dermatophytosis of the body	-1.31677	1.01041	0.267999	0.0369878	1.94182	0.192503	15460	965	14495	FALSE
submucosal	519.9	Symptoms involving respiratory system and other chest symptoms	0.271119	0.208852	1.31143	0.870897	1.9748	0.19424	17445	1139	16306	FALSE
submucosal	506	Empyema and pneumothorax	0.334502	0.257976	1.39724	0.842711	2.31668	0.194755	16223	1077	15146	FALSE
submucosal	362.3	Other nondiabetic retinopathy	0.488631	0.37799	1.63008	0.777067	3.41949	0.196112	16959	1132	15827	FALSE
submucosal	292.2	Mild cognitive impairment	0.415652	0.322548	1.51536	0.805299	2.8515	0.197519	17023	1120	15903	FALSE
submucosal	315.2	Speech and language disorder	1.00668	0.784255	2.73651	0.588337	12.7283	0.199275	17729	1176	16553	FALSE
submucosal	586.1	Anatomical abnormatilies of kidney and ureters	0.995685	0.77692	2.70658	0.590327	12.4093	0.19999	15881	1035	14846	FALSE
submucosal	379.9	Pain, swelling or discharge of eye	0.410555	0.32111	1.50765	0.803466	2.82902	0.201056	15940	1038	14902	FALSE
submucosal	379.4	Anomalies of pupillary function	0.68475	0.537428	1.98328	0.691696	5.68659	0.202619	15864	1031	14833	FALSE
submucosal	378	Strabismus and other disorders of binocular eye movements	0.374083	0.294597	1.45366	0.816011	2.58957	0.204152	15967	1040	14927	FALSE
submucosal	428.2	Heart failure NOS	0.476979	0.376524	1.6112	0.770275	3.37018	0.205228	17057	1125	15932	FALSE
submucosal	290.2	Delirium due to conditions classified elsewhere	0.476478	0.376283	1.61039	0.770253	3.3669	0.205414	16994	1117	15877	FALSE
submucosal	743.9	Osteopenia or other disorder of bone and cartilage	0.187978	0.149369	1.20681	0.900518	1.61727	0.208217	16904	1127	15777	FALSE
submucosal	443.7	Peripheral angiopathy in diseases classified elsewhere	-1.27341	1.01276	0.279876	0.0384492	2.03724	0.20862	16840	1106	15734	FALSE
submucosal	367.4	Presbyopia	0.214209	0.170753	1.23888	0.886505	1.73132	0.209663	18051	1193	16858	FALSE
submucosal	599.5	Frequency of urination and polyuria	0.371285	0.29608	1.4496	0.811369	2.58985	0.209842	12956	773	12183	FALSE
submucosal	427.7	Tachycardia NOS	0.159023	0.126972	1.17237	0.914075	1.50364	0.210416	14522	931	13591	FALSE
submucosal	749	Congenital anomalies of face and neck	0.671365	0.537601	1.95691	0.682268	5.61287	0.211732	18359	1230	17129	FALSE
submucosal	351	Other peripheral nerve disorders	0.156338	0.125251	1.16922	0.914705	1.49456	0.211957	17023	1139	15884	FALSE
submucosal	907	Injuries to the nervous system	-0.897793	0.719633	0.407468	0.0994327	1.66977	0.212188	18347	1229	17118	FALSE
submucosal	347	Cataplexy and narcolepsy	0.670042	0.53769	1.95432	0.681247	5.60643	0.212709	16144	1064	15080	FALSE
submucosal	803	Fracture of upper limb	-0.231603	0.186636	0.793261	0.550236	1.14362	0.214629	16867	1114	15753	FALSE
submucosal	523	Gingival and periodontal diseases	0.254658	0.205595	1.29002	0.862166	1.9302	0.215478	17153	1132	16021	FALSE
submucosal	362.31	Separation of retinal layers	0.960731	0.77644	2.61361	0.570586	11.9718	0.215956	16899	1126	15773	FALSE
submucosal	714	Rheumatoid arthritis and other inflammatory polyarthropathies	0.236644	0.191777	1.26699	0.870021	1.84509	0.21722	16840	1101	15739	FALSE
submucosal	561.1	Diarrhea	0.1458	0.118249	1.15696	0.917623	1.45873	0.217579	17444	1169	16275	FALSE
submucosal	276	Disorders of fluid, electrolyte, and acid-base balance	0.110815	0.0899005	1.11719	0.936702	1.33245	0.217711	17153	1141	16012	FALSE
submucosal	592.12	Chronic cystitis	0.658509	0.534948	1.93191	0.677064	5.51244	0.218331	13039	804	12235	FALSE
submucosal	478	Throat pain	0.301438	0.245279	1.3518	0.835847	2.18625	0.219087	12094	731	11363	FALSE
submucosal	302	Sexual and gender identity disorders	0.65356	0.533005	1.92237	0.676292	5.46438	0.220132	11151	647	10504	FALSE
submucosal	226	Benign neoplasm of thyroid glands	0.587794	0.480303	1.80001	0.702156	4.61442	0.221028	17900	1188	16712	FALSE
submucosal	737.1	Kyphosis (acquired)	0.584512	0.47826	1.79412	0.702664	4.58093	0.221645	16151	1025	15126	FALSE
submucosal	427.3	Other specified cardiac dysrhythmias	-0.279156	0.228696	0.756422	0.483164	1.18422	0.222221	13963	878	13085	FALSE
submucosal	694.1	Vitiligo	0.75694	0.621082	2.13174	0.631043	7.2013	0.222942	14803	894	13909	FALSE
submucosal	550.3	Femoral hernia	0.941017	0.776981	2.56259	0.558855	11.7505	0.22585	16482	1092	15390	FALSE
submucosal	733	Other disorders of bone and cartilage	0.148219	0.122802	1.15977	0.911673	1.47537	0.227443	15870	1012	14858	FALSE
submucosal	420.3	Endocarditis	-1.21975	1.0125	0.295305	0.0405895	2.14846	0.228323	17848	1188	16660	FALSE
submucosal	386	Vertiginous syndromes and other disorders of vestibular system	0.193176	0.160395	1.2131	0.885859	1.66122	0.228443	15554	993	14561	FALSE
submucosal	561	Symptoms involving digestive system	0.125866	0.104511	1.13413	0.924063	1.39195	0.228461	14269	910	13359	FALSE
submucosal	364.4	Corneal degenerations	0.576828	0.479305	1.78038	0.695857	4.55518	0.228796	16996	1133	15863	FALSE
submucosal	586.3	Vascular disorders of kidney/hypertrophy	0.926898	0.770319	2.52666	0.558262	11.4355	0.228874	15882	1035	14847	FALSE
submucosal	327.31	Central/nonobstroctive sleep apnea	0.644017	0.535488	1.90411	0.666617	5.43888	0.229103	14380	898	13482	FALSE
submucosal	789.1	Persistent vomiting	0.923725	0.770707	2.51865	0.55607	11.408	0.230706	13933	880	13053	FALSE
submucosal	704.11	Alopecia Areata	0.571648	0.478065	1.77118	0.693948	4.52065	0.231792	16008	994	15014	FALSE
submucosal	585.1	Acute renal failure	0.166726	0.139608	1.18143	0.89861	1.55326	0.232382	16656	1094	15562	FALSE
submucosal	556.1	Ulceration of intestine	0.47704	0.401418	1.6113	0.733639	3.53891	0.23468	12733	798	11935	FALSE
submucosal	727.2	Bursitis disorders	0.517644	0.436566	1.67807	0.713178	3.94841	0.235733	13118	772	12346	FALSE
submucosal	198.3	Secondary malignant neoplasm of digestive systems	1.32815	1.12013	3.77407	0.420087	33.9062	0.235734	16175	1050	15125	FALSE
submucosal	376	Disorders of the orbit	0.913031	0.770932	2.49186	0.549913	11.2916	0.236286	15846	1029	14817	FALSE
submucosal	1000	Burns	0.348436	0.29441	1.41685	0.795642	2.52308	0.236608	18436	1236	17200	FALSE
submucosal	281.9	Deficiency anemias	0.473605	0.400365	1.60577	0.732633	3.51951	0.236836	13315	725	12590	FALSE
submucosal	198.4	Secondary malignant neoplasm of liver	0.898302	0.766347	2.45543	0.546764	11.027	0.241122	16184	1051	15133	FALSE
submucosal	707.1	Decubitus ulcer	-0.537014	0.458543	0.584491	0.237935	1.43581	0.241546	18172	1215	16957	FALSE
submucosal	201	Hodgkin's disease	-1.18564	1.01243	0.305551	0.0420039	2.22268	0.241563	17932	1194	16738	FALSE
submucosal	385.3	Cholesteatoma	0.624871	0.534251	1.868	0.655563	5.32282	0.242154	15030	949	14081	FALSE
submucosal	370.2	Superficial keratitis	-1.18314	1.01323	0.306314	0.0420422	2.23177	0.242931	15226	984	14242	FALSE
submucosal	367.1	Myopia	0.154563	0.132371	1.16715	0.900428	1.51287	0.24295	17164	1124	16040	FALSE
submucosal	594.1	Calculus of kidney	0.16335	0.140213	1.17745	0.89452	1.54986	0.244014	17685	1186	16499	FALSE
submucosal	427.22	Atrial flutter	0.334025	0.287849	1.39658	0.794407	2.4552	0.24588	13710	871	12839	FALSE
submucosal	803.2	Fracture of radius and ulna	-0.292563	0.252933	0.746348	0.454611	1.2253	0.247403	16626	1099	15527	FALSE
submucosal	275.6	Hypercalcemia	0.245825	0.213622	1.27868	0.841244	1.94356	0.249836	17400	1147	16253	FALSE
submucosal	224.1	Benign neoplasm of eye, uveal	-0.678298	0.590199	0.50748	0.159599	1.61364	0.250445	18110	1208	16902	FALSE
submucosal	647	Infectious and parasitic complications affecting pregnancy	-0.419361	0.365139	0.657467	0.321412	1.34489	0.250763	17849	1207	16642	FALSE
submucosal	433	Cerebrovascular disease	0.162493	0.141499	1.17644	0.891504	1.55244	0.250817	17958	1194	16764	FALSE
submucosal	189.2	Cancer of bladder	-0.82327	0.718585	0.438994	0.107346	1.79527	0.251926	18279	1224	17055	FALSE
submucosal	459	Other disorders of circulatory system	0.278919	0.243648	1.3217	0.819852	2.13074	0.252308	16954	1136	15818	FALSE
submucosal	401.2	Hypertensive heart and/or renal disease	0.167122	0.146003	1.1819	0.887769	1.57348	0.252356	13348	845	12503	FALSE
submucosal	727.1	Synovitis and tenosynovitis	0.174537	0.152484	1.19069	0.883086	1.60545	0.252365	13751	819	12932	FALSE
submucosal	401.22	Hypertensive chronic kidney disease	0.235768	0.206197	1.26588	0.845035	1.89632	0.252866	12914	811	12103	FALSE
submucosal	556	Ulceration of the lower GI tract	0.428789	0.375041	1.5354	0.736172	3.2023	0.252909	12746	799	11947	FALSE
submucosal	519	Other diseases of respiratory system, not elsewhere classified	0.209278	0.183174	1.23279	0.860929	1.76526	0.253243	17555	1147	16408	FALSE
submucosal	352.1	Trigeminal nerve disorders [CN5]	0.314058	0.274943	1.36897	0.798651	2.34655	0.253344	16252	1077	15175	FALSE
submucosal	574.1	Cholelithiasis	0.167872	0.147495	1.18279	0.885841	1.57927	0.255055	17596	1177	16419	FALSE
submucosal	742.8	Articular cartilage disorder	0.60637	0.532883	1.83376	0.645273	5.21126	0.255161	15607	969	14638	FALSE
submucosal	669	Complications of labor and delivery NEC	-0.52208	0.459057	0.593286	0.241272	1.45889	0.255419	18155	1220	16935	FALSE
submucosal	747.12	Valvular heart disease/ heart chambers	0.49571	0.437004	1.64166	0.697106	3.86607	0.256653	18000	1197	16803	FALSE
submucosal	378.1	Strabismus (not specified as paralytic)	0.455379	0.401601	1.57677	0.71766	3.46432	0.256833	15900	1034	14866	FALSE
submucosal	427.4	Cardiac arrest and ventricular fibrillation	-1.14324	1.01265	0.318784	0.0438036	2.31997	0.258914	13606	858	12748	FALSE
submucosal	414	Other forms of chronic heart disease	-0.27824	0.24648	0.757115	0.467039	1.22736	0.25896	16884	1099	15785	FALSE
submucosal	274.11	Gouty arthropathy	0.492234	0.436137	1.63597	0.695868	3.84611	0.259058	18133	1210	16923	FALSE
submucosal	353.2	Nerve root lesions	-1.13672	1.01127	0.32087	0.0442102	2.32882	0.260989	16138	1063	15075	FALSE
submucosal	535	Gastritis and duodenitis	0.196878	0.175731	1.2176	0.862816	1.71826	0.262568	16934	1115	15819	FALSE
submucosal	242.1	Graves' disease	0.354409	0.318944	1.42534	0.762829	2.66323	0.266484	14281	902	13379	FALSE
submucosal	386.2	Peripheral or central vertigo	0.208383	0.187788	1.23169	0.852415	1.77971	0.26714	15392	980	14412	FALSE
submucosal	634.1	Missed abortion/Hydatidiform mole	-0.258639	0.234856	0.772101	0.48726	1.22345	0.27078	16008	1138	14870	FALSE
submucosal	961	Poisoning by other anti-infectives	-1.11244	1.01027	0.328754	0.045385	2.38139	0.270838	17857	1178	16679	FALSE
submucosal	189.21	Malignant neoplasm of bladder	-0.791253	0.719168	0.453276	0.110712	1.8558	0.27123	18277	1224	17053	FALSE
submucosal	577.1	Acute pancreatitis	-0.790749	0.719706	0.453505	0.110651	1.8587	0.271894	18038	1208	16830	FALSE
submucosal	585.31	Renal dialysis	0.476401	0.434164	1.61027	0.687592	3.77109	0.272517	15925	1039	14886	FALSE
submucosal	695.41	Cutaneous lupus erythematosus	0.67693	0.617213	1.96783	0.586955	6.59734	0.27275	14657	885	13772	FALSE
submucosal	498	Acute bronchospasm	0.68052	0.621085	1.9749	0.584612	6.67151	0.273212	15020	947	14073	FALSE
submucosal	521.1	Dental caries	0.209525	0.191811	1.23309	0.846686	1.79584	0.274679	17213	1136	16077	FALSE
submucosal	700	Corns and callosities	0.335811	0.307616	1.39907	0.765583	2.55675	0.274985	16072	1010	15062	FALSE
submucosal	277.6	Other deficiencies of circulating enzymes	1.21496	1.1203	3.37016	0.375003	30.2877	0.278144	17740	1178	16562	FALSE
submucosal	714.1	Rheumatoid arthritis	0.250774	0.231693	1.28502	0.815997	2.02363	0.279095	16723	1091	15632	FALSE
submucosal	389.1	Sensorineural hearing loss	0.148064	0.136802	1.15959	0.88686	1.51618	0.279109	17125	1137	15988	FALSE
submucosal	573.4	Acute and subacute necrosis of liver	-1.09551	1.01236	0.334369	0.0459715	2.432	0.279192	15468	1009	14459	FALSE
submucosal	427.1	Paroxysmal tachycardia, unspecified	0.205969	0.19035	1.22871	0.8461	1.78435	0.279229	13945	889	13056	FALSE
submucosal	365.11	Primary open angle glaucoma	0.436973	0.40424	1.54801	0.700936	3.41878	0.279709	17020	1135	15885	FALSE
submucosal	275.5	Disorders of calcium/phosphorus metabolism	0.23374	0.216558	1.26332	0.826369	1.9313	0.280436	17396	1146	16250	FALSE
submucosal	276.42	Alkalosis	-1.08687	1.01316	0.337272	0.0462981	2.45696	0.283383	15001	977	14024	FALSE
submucosal	618.6	Vaginal enterocele, congenital or acquired	0.430317	0.402031	1.53774	0.699308	3.38143	0.284459	17238	1136	16102	FALSE
submucosal	360	Disorders of the globe	-1.08191	1.01113	0.338947	0.0467138	2.45935	0.284616	16994	1129	15865	FALSE
submucosal	90.2	Gonococcal infections	1.19753	1.11964	3.31193	0.369002	29.7259	0.284812	18341	1229	17112	FALSE
submucosal	443	Peripheral vascular disease	-0.249063	0.234003	0.779531	0.492772	1.23316	0.287166	17149	1125	16024	FALSE
submucosal	723.1	Torticollis	0.659052	0.61945	1.93296	0.574032	6.50892	0.28736	14698	927	13771	FALSE
submucosal	800.2	Fracture of unspecified part of femur	-1.07486	1.01039	0.341347	0.0471123	2.47319	0.287418	16359	1083	15276	FALSE
submucosal	681.2	Cellulitis and abscess of face/neck	0.356169	0.335313	1.42785	0.740045	2.75491	0.288146	15515	1003	14512	FALSE
submucosal	375.1	Dry eyes	0.135365	0.127692	1.14495	0.891446	1.47056	0.289103	16798	1104	15694	FALSE
submucosal	565.1	Anal and rectal polyp	0.373513	0.353233	1.45283	0.727004	2.9033	0.290323	15300	950	14350	FALSE
submucosal	696.41	Psoriasis vulgaris	0.26425	0.250105	1.30245	0.797753	2.12645	0.290714	14704	891	13813	FALSE
submucosal	840	Sprains and strains	0.120073	0.113897	1.12758	0.901977	1.40961	0.291782	16605	1065	15540	FALSE
submucosal	153.3	Malignant neoplasm of rectum, rectosigmoid junction, and anus	0.348965	0.333372	1.4176	0.737533	2.72474	0.295204	15753	976	14777	FALSE
submucosal	411.2	Myocardial infarction	0.219217	0.209816	1.2451	0.825288	1.87847	0.296114	16860	1107	15753	FALSE
submucosal	818	Intracranial hemorrhage (injury)	-1.05522	1.01106	0.348115	0.0479836	2.52553	0.296633	18059	1205	16854	FALSE
submucosal	446.9	Arteritis NOS	0.64563	0.619057	1.90719	0.566815	6.4172	0.296983	16819	1108	15711	FALSE
submucosal	286.1	Congenital coagulation defects	0.45129	0.433321	1.57034	0.671649	3.67149	0.297658	16628	1092	15536	FALSE
submucosal	938.2	Chronic dermatitis due to solar radiation	0.195953	0.18872	1.21647	0.84035	1.76093	0.299116	15140	925	14215	FALSE
submucosal	361	Retinal detachments and defects	0.332237	0.320614	1.39408	0.743664	2.61337	0.300085	17067	1139	15928	FALSE
submucosal	671	Venous/cerebrovascular complications embolism in pregnancy and the puerperium	-0.526883	0.513368	0.590443	0.215869	1.61497	0.304738	18019	1225	16794	FALSE
submucosal	295.2	Paranoid disorders	0.486372	0.474487	1.62641	0.641708	4.12212	0.30534	11165	648	10517	FALSE
submucosal	709.4	Polymyositis	1.12541	1.09817	3.08147	0.358075	26.518	0.305459	14599	878	13721	FALSE
submucosal	426.24	Atrioventricular block, complete	-1.03565	1.01115	0.354997	0.048923	2.57593	0.305729	13602	858	12744	FALSE
submucosal	252	Disorders of parathyroid gland	0.227309	0.222096	1.25522	0.812208	1.93986	0.306085	16211	1044	15167	FALSE
submucosal	202.2	Non-Hodgkins lymphoma	0.301132	0.294365	1.35139	0.758946	2.40629	0.306314	18029	1206	16823	FALSE
submucosal	348.7	Coma	0.777279	0.761554	2.17555	0.489013	9.67868	0.307421	16128	1062	15066	FALSE
submucosal	362.27	Drusen (degenerative) of retina	-0.732691	0.721832	0.480614	0.116778	1.97803	0.310085	16943	1126	15817	FALSE
submucosal	275.51	Hypocalcemia	0.323913	0.319127	1.38253	0.739651	2.58416	0.310108	17230	1133	16097	FALSE
submucosal	687	Symptoms affecting skin	0.173278	0.170993	1.1892	0.850553	1.66267	0.310888	14337	903	13434	FALSE
submucosal	474.2	Chronic tonsillitis and adenoiditis	0.297742	0.294236	1.34681	0.75657	2.39755	0.311578	12029	725	11304	FALSE
submucosal	368.2	Diplopia and disorders of binocular vision	0.309547	0.30599	1.36281	0.748119	2.48255	0.311718	17046	1132	15914	FALSE
submucosal	415.2	Chronic pulmonary heart disease	0.322324	0.318956	1.38033	0.738725	2.5792	0.312226	17392	1144	16248	FALSE
submucosal	571.8	Liver abscess and sequelae of chronic liver disease	-0.393076	0.389047	0.674978	0.314866	1.44695	0.312325	15577	1015	14562	FALSE
submucosal	288.1	Decreased white blood cell count	0.196019	0.194052	1.21655	0.831666	1.77955	0.312432	15441	970	14471	FALSE
submucosal	401.3	Other hypertensive complications	0.243037	0.240628	1.27512	0.795651	2.04351	0.31249	12807	803	12004	FALSE
submucosal	255.11	Cushing's syndrome	-1.01979	1.01174	0.360671	0.0496479	2.62011	0.313475	15979	1022	14957	FALSE
submucosal	480	Pneumonia	0.142887	0.141766	1.1536	0.873739	1.5231	0.313499	15453	990	14463	FALSE
submucosal	420.22	Chronic pericarditis	0.76639	0.761551	2.15198	0.48372	9.57379	0.314245	17819	1189	16630	FALSE
submucosal	386.3	Labyrinthitis	-1.01682	1.01173	0.361745	0.0497971	2.62785	0.314881	15043	948	14095	FALSE
submucosal	938	Dermatitis due to solar radiation	0.179277	0.178404	1.19635	0.843332	1.69715	0.314947	15201	929	14272	FALSE
submucosal	411	Ischemic Heart Disease	0.124973	0.124489	1.13312	0.887785	1.44625	0.315434	17603	1162	16441	FALSE
submucosal	395.1	Nonrheumatic mitral valve disorders	0.182201	0.181653	1.19986	0.840433	1.71299	0.315852	17355	1142	16213	FALSE
submucosal	751.22	Other specified congenital anomalies of kidney	-1.01555	1.01298	0.362204	0.0497376	2.63768	0.316087	17558	1176	16382	FALSE
submucosal	444.2	Embolism and thrombosis of abdominal aorta	0.767432	0.765769	2.15423	0.480237	9.66335	0.316261	16809	1107	15702	FALSE
submucosal	715	Other inflammatory spondylopathies	0.217347	0.217671	1.24278	0.811162	1.90405	0.318031	16757	1094	15663	FALSE
submucosal	754	Congenital musculoskeletal deformities of spine	0.619637	0.620806	1.85825	0.550382	6.27402	0.318223	18081	1214	16867	FALSE
submucosal	245.2	Chronic thyroiditis	-0.231425	0.23285	0.793402	0.502675	1.25227	0.32028	14537	911	13626	FALSE
submucosal	246.2	Thyroid cyst	1.11331	1.12063	3.04443	0.338539	27.378	0.320479	14167	892	13275	FALSE
submucosal	521	Diseases of hard tissues of teeth	0.190224	0.191687	1.20952	0.830703	1.76109	0.32102	17219	1136	16083	FALSE
submucosal	528.5	Diseases of lips	-0.716377	0.722383	0.488519	0.11857	2.01273	0.32135	17312	1160	16152	FALSE
submucosal	364	Corneal opacity and other disorders of cornea	0.317718	0.320454	1.37399	0.733175	2.57489	0.321459	17069	1139	15930	FALSE
submucosal	994.21	Septic shock	-0.414706	0.419657	0.660534	0.290186	1.50354	0.323053	17848	1199	16649	FALSE
submucosal	701.6	Acquired acanthosis nigricans	0.747833	0.756845	2.11242	0.479226	9.31149	0.323107	15961	1000	14961	FALSE
submucosal	440.2	Atherosclerosis of the extremities	-0.712785	0.721699	0.490277	0.119157	2.01727	0.323325	16850	1107	15743	FALSE
submucosal	614.33	Pelvic inflammatory disease, NOS	0.421989	0.428323	1.52499	0.658676	3.53072	0.324519	13065	703	12362	FALSE
submucosal	442.4	Arterial dissection	0.520728	0.532934	1.68325	0.592252	4.78401	0.328521	16830	1109	15721	FALSE
submucosal	333.4	Torsion dystonia	0.327158	0.334947	1.38702	0.7194	2.67421	0.328695	16217	1070	15147	FALSE
submucosal	245	Thyroiditis	-0.204321	0.209259	0.815201	0.540929	1.22854	0.328865	14615	916	13699	FALSE
submucosal	38.1	Gram negative septicemia	-0.500181	0.512309	0.606421	0.222171	1.65524	0.328902	16061	1046	15015	FALSE
submucosal	426.32	Left bundle branch block	0.346284	0.354873	1.4138	0.705204	2.83441	0.329166	13659	866	12793	FALSE
submucosal	726.3	Bursitis	0.238759	0.244768	1.26967	0.785852	2.05136	0.329338	13300	785	12515	FALSE
submucosal	756	Other congenital musculoskeletal anomalies	-0.702138	0.720594	0.495525	0.120693	2.03445	0.329864	18114	1213	16901	FALSE
submucosal	427.42	Cardiac arrest	-0.985905	1.01183	0.373101	0.0513494	2.71093	0.329871	13600	858	12742	FALSE
submucosal	767	Cervicocranial/Cervicobrachial syndrome	0.746283	0.766156	2.10915	0.469831	9.46829	0.330025	15588	1004	14584	FALSE
submucosal	252.1	Hyperparathyroidism	0.225678	0.232217	1.25317	0.794957	1.97551	0.331129	16187	1042	15145	FALSE
submucosal	505	Other pulmonary inflamation or edema	-0.981606	1.01233	0.374709	0.0515206	2.72525	0.332221	16076	1061	15015	FALSE
submucosal	520.2	Disturbances in tooth eruption	0.41913	0.435396	1.52064	0.647753	3.56979	0.335727	16914	1111	15803	FALSE
submucosal	362	Other retinal disorders	-0.193137	0.200836	0.824369	0.556117	1.22202	0.336219	17350	1152	16198	FALSE
submucosal	300.3	Obsessive-compulsive disorders	-0.692934	0.720718	0.500107	0.12178	2.05376	0.336326	11175	645	10530	FALSE
submucosal	989	Toxic effect of other substances, chiefly nonmedicinal as to source	1.08066	1.12432	2.94663	0.325304	26.6908	0.336465	18371	1235	17136	FALSE
submucosal	715.1	Sacroiliitis NEC	0.239937	0.25078	1.27117	0.777562	2.07812	0.338687	16682	1088	15594	FALSE
submucosal	270.33	Amyloidosis	0.72975	0.763215	2.07456	0.464798	9.25951	0.338995	17789	1191	16598	FALSE
submucosal	577.2	Chronic pancreatitis	-0.688653	0.72084	0.502252	0.122273	2.06307	0.339402	18034	1208	16826	FALSE
submucosal	202	Cancer of other lymphoid, histiocytic tissue	0.279351	0.294007	1.32227	0.743117	2.3528	0.342035	18032	1206	16826	FALSE
submucosal	571.81	Portal hypertension	-0.486757	0.512404	0.614616	0.225132	1.67792	0.342138	15520	1012	14508	FALSE
submucosal	572	Ascites (non malignant)	0.180305	0.190455	1.19758	0.824494	1.7395	0.343787	15831	1039	14792	FALSE
submucosal	250.25	Diabetes type 2 with peripheral circulatory disorders	-0.485932	0.514012	0.615124	0.224609	1.68461	0.34447	15378	1000	14378	FALSE
submucosal	550.1	Inguinal hernia	0.408731	0.432763	1.50491	0.644369	3.51468	0.34493	16529	1096	15433	FALSE
submucosal	707.2	Chronic ulcer of leg or foot	0.333206	0.353597	1.39544	0.697786	2.7906	0.346021	18141	1219	16922	FALSE
submucosal	380	Disorders of external ear	-0.956312	1.01547	0.384308	0.0525162	2.81232	0.346324	16882	1109	15773	FALSE
submucosal	569	Other disorders of intestine	0.129949	0.138022	1.13877	0.86886	1.49253	0.346442	16043	1002	15041	FALSE
submucosal	695.4	Lupus (localized and systemic)	0.286116	0.304465	1.33125	0.73298	2.41782	0.347355	14775	894	13881	FALSE
submucosal	286.7	Other and unspecified coagulation defects	0.216441	0.230638	1.24165	0.790089	1.95129	0.348016	16822	1107	15715	FALSE
submucosal	41.4	E. coli	0.227626	0.243038	1.25562	0.779792	2.02178	0.348972	16191	1061	15130	FALSE
submucosal	365.2	Primary angle-closure glaucoma	0.406002	0.434045	1.50081	0.641	3.51391	0.349587	17013	1134	15879	FALSE
submucosal	580.2	Nephrotic syndrome without mention of glomerulonephritis	-0.946584	1.01308	0.388064	0.0532787	2.82653	0.350116	15905	1034	14871	FALSE
submucosal	594	Urinary calculus	0.126823	0.135786	1.13522	0.869951	1.48137	0.350309	17760	1190	16570	FALSE
submucosal	132	Infestation (lice, mites)	0.575903	0.617005	1.77874	0.53077	5.96096	0.350621	18023	1197	16826	FALSE
submucosal	573.2	Liver replaced by transplant	-0.944849	1.01232	0.388738	0.0534506	2.82723	0.350639	15461	1009	14452	FALSE
submucosal	296.1	Bipolar	0.167158	0.179878	1.18194	0.830769	1.68155	0.352743	11602	679	10923	FALSE
submucosal	275.1	Disorders of iron metabolism	0.43712	0.473498	1.54824	0.612054	3.91641	0.355917	17161	1127	16034	FALSE
submucosal	377	Disorders of optic nerve and visual pathways	0.270244	0.293073	1.31028	0.737729	2.3272	0.356474	15979	1040	14939	FALSE
submucosal	503	Pulmonary congestion and hypostasis	-0.358883	0.389587	0.698456	0.325474	1.49886	0.356951	16186	1067	15119	FALSE
submucosal	755	Congenital anomalies of limbs	0.43604	0.474566	1.54657	0.610114	3.92039	0.358191	18105	1216	16889	FALSE
submucosal	194	Cancer of other endocrine glands	0.695504	0.757644	2.00472	0.454081	8.85061	0.358628	17876	1185	16691	FALSE
submucosal	446.3	Hypersensitivity angiitis	1.02683	1.12077	2.7922	0.310407	25.1166	0.35957	16800	1106	15694	FALSE
submucosal	411.4	Coronary atherosclerosis	0.128749	0.140808	1.13741	0.863092	1.4989	0.360526	17351	1143	16208	FALSE
submucosal	613.1	Inflammatory disease of breast	0.341262	0.373243	1.40672	0.676858	2.92361	0.36055	15399	936	14463	FALSE
submucosal	536.7	Complications of gastrostomy, colostomy and enterostomy	-0.926587	1.014	0.395903	0.0542567	2.88884	0.360826	16532	1079	15453	FALSE
submucosal	535.2	Atrophic gastritis	0.278515	0.305388	1.32117	0.726117	2.40386	0.361766	16629	1090	15539	FALSE
submucosal	624.1	Dystrophy of female genital tract	0.482134	0.529923	1.61953	0.573203	4.57581	0.362918	15782	990	14792	FALSE
submucosal	41.8	H. pylori	-0.920808	1.01367	0.398197	0.0546069	2.90368	0.363671	16000	1043	14957	FALSE
submucosal	249	Secondary diabetes mellitus	0.362345	0.399388	1.4367	0.656748	3.1429	0.364274	15364	1003	14361	FALSE
submucosal	916	Contusion	0.159295	0.176199	1.17268	0.830228	1.6564	0.365961	17604	1175	16429	FALSE
submucosal	709.7	Unspecified diffuse connective tissue disease	-0.648652	0.719982	0.52275	0.127477	2.14365	0.367626	14652	879	13773	FALSE
submucosal	112.3	Candidiasis of skin and nails	0.336245	0.373311	1.39968	0.67338	2.90936	0.367743	15496	972	14524	FALSE
submucosal	245.21	Chronic lymphocytic thyroiditis	-0.209315	0.232949	0.81114	0.513813	1.28052	0.368896	14530	911	13619	FALSE
submucosal	447	Other disorders of arteries and arterioles	-0.259654	0.289113	0.771318	0.437659	1.35935	0.369128	17027	1118	15909	FALSE
submucosal	701.5	Abnormal granulation tissue	0.424321	0.473412	1.52855	0.604371	3.86596	0.370091	15995	1003	14992	FALSE
submucosal	427.8	Sinoatrial node dysfunction (Bradycardia)	0.317919	0.354853	1.37426	0.685509	2.75504	0.370297	13659	866	12793	FALSE
submucosal	333	Extrapyramidal disease and abnormal movement disorders	0.177289	0.198251	1.19398	0.809545	1.76096	0.371179	16457	1089	15368	FALSE
submucosal	780	Hypothermia/Chills	0.966806	1.0827	2.62953	0.314965	21.953	0.371881	18401	1234	17167	FALSE
submucosal	276.1	Electrolyte imbalance	0.0927189	0.103894	1.09715	0.895016	1.34494	0.372159	16587	1095	15492	FALSE
submucosal	381.11	Suppurative and unspecified otitis media	0.170938	0.191787	1.18642	0.814677	1.72779	0.372772	15383	976	14407	FALSE
submucosal	721.2	Spondylosis with myelopathy	-0.457581	0.514098	0.632812	0.231029	1.73334	0.37343	14763	928	13835	FALSE
submucosal	261.41	Rickets or osteomalacia	0.673852	0.758198	1.96178	0.443873	8.67044	0.374135	14289	880	13409	FALSE
submucosal	395.4	Nonrheumatic pulmonary valve disorders	0.549345	0.619873	1.73212	0.513962	5.83746	0.375498	16955	1110	15845	FALSE
submucosal	736.6	Unequal leg length (acquired)	0.972072	1.0974	2.64342	0.307638	22.7139	0.375728	16113	1021	15092	FALSE
submucosal	766	Neuralgia, neuritis, and radiculitis NOS	0.156467	0.176806	1.16937	0.8269	1.65369	0.376173	16022	1039	14983	FALSE
submucosal	202.21	Nodular lymphoma	0.469803	0.531224	1.59968	0.564737	4.53127	0.376492	17926	1197	16729	FALSE
submucosal	441	Vascular insufficiency of intestine	-0.638187	0.721739	0.52825	0.128376	2.17368	0.376569	16848	1107	15741	FALSE
submucosal	627.5	Premature menopause and other ovarian failure	0.65109	0.736722	1.91763	0.452537	8.12598	0.376823	8389	268	8121	FALSE
submucosal	620	Dysplasia of female genital organs	0.462189	0.524444	1.58755	0.56795	4.43754	0.378159	14019	692	13327	FALSE
submucosal	429.3	Symptoms involving cardiovascular system	0.2083	0.237417	1.23158	0.77334	1.96136	0.380291	17213	1137	16076	FALSE
submucosal	443.1	Raynaud's syndrome	-0.320445	0.365379	0.725826	0.354663	1.48542	0.380476	16946	1113	15833	FALSE
submucosal	524	Dentofacial anomalies, including malocclusion	0.309366	0.353337	1.36256	0.681695	2.72347	0.381271	16951	1114	15837	FALSE
submucosal	426.9	Cardiac pacemaker/device in situ	0.664413	0.758985	1.94335	0.439025	8.60225	0.381358	13578	859	12719	FALSE
submucosal	723	Other disorders of cervical region	0.247435	0.282684	1.28074	0.735927	2.22887	0.381406	14838	938	13900	FALSE
submucosal	652	Malposition and malpresentation of fetus or obstruction	-0.885757	1.01531	0.412402	0.0563728	3.01697	0.382991	18305	1232	17073	FALSE
submucosal	200	Myeloproliferative disease	0.255587	0.29313	1.29122	0.726913	2.2936	0.383251	18033	1206	16827	FALSE
submucosal	362.21	Macular degeneration, dry	-0.886044	1.0165	0.412284	0.0562259	3.02312	0.383392	16921	1125	15796	FALSE
submucosal	535.9	Gastritis and duodenitis, NOS	0.34645	0.39913	1.41404	0.646718	3.09177	0.385387	16571	1085	15486	FALSE
submucosal	593.2	Microscopic hematuria	0.26559	0.306183	1.3042	0.715676	2.37669	0.38571	13146	812	12334	FALSE
submucosal	634.3	Ectopic pregnancy	-0.514729	0.594132	0.597662	0.186518	1.9151	0.386295	15745	1121	14624	FALSE
submucosal	697	Sarcoidosis	0.407305	0.470939	1.50276	0.597062	3.78235	0.387105	14835	896	13939	FALSE
submucosal	527.8	Other specified diseases of the salivary glands	0.533781	0.617442	1.70537	0.508441	5.71999	0.387311	17285	1161	16124	FALSE
submucosal	575.7	Other disorders of gallbladder	0.288113	0.333689	1.33391	0.69356	2.56547	0.387908	17059	1134	15925	FALSE
submucosal	276.41	Acidosis	0.186729	0.216336	1.2053	0.788763	1.84181	0.388058	15260	1000	14260	FALSE
submucosal	172.3	Carcinoma in situ of skin	0.32421	0.375846	1.38294	0.662028	2.88888	0.38835	15865	1010	14855	FALSE
submucosal	350.6	Disturbances of sensation of smell and taste	0.409402	0.474792	1.50592	0.593813	3.81902	0.388536	17262	1157	16105	FALSE
submucosal	227.1	Benign neoplasm of adrenal gland	-0.619778	0.72196	0.538064	0.130704	2.21503	0.390636	17912	1185	16727	FALSE
submucosal	624	Symptoms involving female genital tract	0.370124	0.432131	1.44791	0.620734	3.37738	0.391716	15806	992	14814	FALSE
submucosal	250.13	Type 1 diabetes with ophthalmic manifestations	-0.869185	1.01512	0.419293	0.0573362	3.06625	0.391867	15322	997	14325	FALSE
submucosal	426.2	Atrioventricular [AV] block	-0.507384	0.592857	0.602069	0.188363	1.9244	0.392093	13632	860	12772	FALSE
submucosal	334.2	Anterior horn cell disease	0.939633	1.09836	2.55904	0.297257	22.0304	0.392283	16119	1061	15058	FALSE
submucosal	560.2	Impaction of intestine	0.452512	0.529188	1.57226	0.557275	4.43585	0.392492	12704	795	11909	FALSE
submucosal	450	Noninfectious disorders of lymphatic channels	0.177766	0.208204	1.19455	0.794284	1.79651	0.393212	18283	1225	17058	FALSE
submucosal	429	Ill-defined descriptions and complications of heart disease	0.188672	0.221521	1.20764	0.782306	1.86424	0.394375	17255	1140	16115	FALSE
submucosal	250.6	Polyneuropathy in diabetes	0.193779	0.227685	1.21383	0.776869	1.89656	0.394723	15550	1018	14532	FALSE
submucosal	263	Other nutritional deficiency	-0.61304	0.721766	0.541701	0.131638	2.22915	0.395681	14327	880	13447	FALSE
submucosal	958.2	Traumatic and surgical subcutaneous emphysema	0.917127	1.08282	2.50209	0.299631	20.8939	0.397007	18329	1231	17098	FALSE
submucosal	741.4	Joint effusions	0.14428	0.170502	1.15521	0.827039	1.61359	0.397435	16090	1005	15085	FALSE
submucosal	618	Genital prolapse	0.113416	0.134127	1.1201	0.861162	1.45689	0.397783	18034	1195	16839	FALSE
submucosal	300.13	Phobia	0.297314	0.351654	1.34624	0.675753	2.68198	0.397847	11224	652	10572	FALSE
submucosal	352	Disorders of other cranial nerves	0.191579	0.226668	1.21116	0.776709	1.88862	0.398001	16351	1084	15267	FALSE
submucosal	743.4	Stress fracture	-0.433825	0.514396	0.648026	0.236444	1.77605	0.399023	16332	1075	15257	FALSE
submucosal	337	Disorders of the autonomic nervous system	-0.328759	0.39005	0.719817	0.335123	1.54611	0.399305	16248	1067	15181	FALSE
submucosal	707.3	Chronic ulcer of unspecified site	0.447928	0.531547	1.56507	0.552168	4.43603	0.399403	18086	1214	16872	FALSE
submucosal	537	Other disorders of stomach and duodenum	0.182484	0.216595	1.2002	0.785023	1.83494	0.399501	16790	1102	15688	FALSE
submucosal	713	Arthropathy associated with other disorders classified elsewhere	0.518788	0.616406	1.67999	0.501894	5.62343	0.399993	16527	1081	15446	FALSE
submucosal	369.2	Eye infection, viral	0.335534	0.400887	1.39869	0.637498	3.06876	0.402604	15254	990	14264	FALSE
submucosal	912	Insect bite	0.266719	0.318842	1.30567	0.698924	2.43915	0.402861	17730	1178	16552	FALSE
submucosal	250.23	Type 2 diabetes with ophthalmic manifestations	-0.352655	0.421753	0.70282	0.307497	1.60638	0.403062	15410	1002	14408	FALSE
submucosal	331.9	Cerebral degeneration, unspecified	0.512674	0.613882	1.66975	0.501307	5.56159	0.403643	16141	1063	15078	FALSE
submucosal	752.1	Neural tube defects	0.441898	0.53023	1.55566	0.550267	4.39799	0.404614	18220	1221	16999	FALSE
submucosal	312	Conduct disorders	0.511886	0.615231	1.66843	0.49959	5.57192	0.405397	17744	1177	16567	FALSE
submucosal	452	Other venous embolism and thrombosis	0.143843	0.173361	1.1547	0.822059	1.62195	0.406689	15303	967	14336	FALSE
submucosal	71	Human immunodeficiency virus [HIV] disease	-0.840171	1.01367	0.431637	0.0591927	3.14752	0.407193	14560	894	13666	FALSE
submucosal	303	Psychogenic and somatoform disorders	-0.381776	0.46084	0.682648	0.276645	1.6845	0.407425	11226	648	10578	FALSE
submucosal	283.2	Non-autoimmune hemolytic anemias	0.88416	1.07221	2.42095	0.296007	19.8002	0.409591	13248	719	12529	FALSE
submucosal	90	Sexually transmitted infections (not HIV or hepatitis)	0.436755	0.53007	1.54768	0.547615	4.37406	0.409965	18374	1232	17142	FALSE
submucosal	379	Other disorders of eye	0.117972	0.143324	1.12521	0.849638	1.49017	0.410446	16588	1087	15501	FALSE
submucosal	427.6	Premature beats	0.175413	0.213816	1.19174	0.783749	1.81211	0.411993	13873	882	12991	FALSE
submucosal	447.7	Aortic ectasia	-0.345679	0.422303	0.707739	0.309316	1.61936	0.413038	16910	1111	15799	FALSE
submucosal	362.29	Macular degeneration (senile) of retina NOS	-0.591257	0.724628	0.553631	0.133784	2.29106	0.414532	16937	1126	15811	FALSE
submucosal	368.1	Amblyopia	-0.829011	1.01824	0.436481	0.0593233	3.21148	0.415551	16948	1121	15827	FALSE
submucosal	292	Neurological disorders	0.117701	0.14514	1.12491	0.846392	1.49507	0.417395	17635	1165	16470	FALSE
submucosal	797.1	Cardiogenic shock	-0.821519	1.01576	0.439763	0.0600599	3.21998	0.418647	18190	1220	16970	FALSE
submucosal	306.9	Tension headache	-0.475312	0.591896	0.621691	0.194869	1.98338	0.421956	11188	646	10542	FALSE
submucosal	510	Other diseases of lung	0.151319	0.188456	1.16337	0.804081	1.68319	0.422009	17855	1192	16663	FALSE
submucosal	327.41	Organic or persistent insomnia	0.185639	0.231761	1.20399	0.76444	1.89627	0.423135	14614	915	13699	FALSE
submucosal	380.4	Impacted cerumen	0.134394	0.168462	1.14384	0.822183	1.59135	0.425004	17350	1149	16201	FALSE
submucosal	701.3	Circumscribed scleroderma	0.254067	0.318939	1.28926	0.690007	2.40894	0.425684	16072	1009	15063	FALSE
submucosal	452.2	Deep vein thrombosis [DVT]	0.165375	0.208031	1.17984	0.784768	1.77379	0.426642	15134	955	14179	FALSE
submucosal	364.1	Corneal opacity	0.489002	0.615585	1.63069	0.487949	5.44963	0.42698	16981	1131	15850	FALSE
submucosal	333.2	Myoclonus	-0.807838	1.01829	0.445821	0.0605863	3.28054	0.427586	16142	1061	15081	FALSE
submucosal	614.1	Pelvic peritoneal adhesions, female (postoperative) (postinfection)	0.22226	0.281441	1.2489	0.719381	2.16817	0.429691	13201	711	12490	FALSE
submucosal	528.41	Cyst of the salivary gland	0.864394	1.0972	2.37357	0.276342	20.3871	0.430803	17266	1159	16107	FALSE
submucosal	724.8	Other symptoms referable to back	-0.400711	0.514107	0.669844	0.244544	1.83481	0.435726	14759	928	13831	FALSE
submucosal	800	Fracture of lower limb	0.129266	0.166062	1.13799	0.821835	1.57577	0.436322	16840	1124	15716	FALSE
submucosal	242.2	Toxic multinodular goiter	0.410012	0.529273	1.50684	0.533998	4.25199	0.438534	14202	895	13307	FALSE
submucosal	716.2	Unspecified monoarthritis	0.850578	1.09839	2.341	0.271917	20.1543	0.438701	16507	1079	15428	FALSE
submucosal	361.1	Retinal detachment with retinal defect	-0.78606	1.01823	0.455636	0.0619276	3.35237	0.440121	16984	1129	15855	FALSE
submucosal	724.1	Disorders of sacrum	0.182839	0.236983	1.20062	0.754539	1.91043	0.440394	14922	944	13978	FALSE
submucosal	198	Secondary malignant neoplasm	0.140973	0.183014	1.15139	0.804338	1.6482	0.441131	16644	1083	15561	FALSE
submucosal	270.1	Disturbances of amino-acid transport	-0.7833	1.01727	0.456896	0.0622156	3.35532	0.441298	17804	1190	16614	FALSE
submucosal	749.1	Cleft palate	0.831386	1.08245	2.2965	0.27521	19.1632	0.442453	16449	1092	15357	FALSE
submucosal	500.1	Extrinsic allergic alveolitis	0.82951	1.08218	2.2922	0.274843	19.1169	0.443367	16046	1061	14985	FALSE
submucosal	270.38	Other specified disorders of plasma protein metabolism	-0.777585	1.0161	0.459514	0.0627159	3.36682	0.444114	17806	1190	16616	FALSE
submucosal	295.3	Psychosis	-0.55293	0.72259	0.575262	0.139567	2.37108	0.444149	11168	645	10523	FALSE
submucosal	270.35	Macroglobulinemia	0.826982	1.08357	2.28641	0.273402	19.1208	0.445343	17781	1190	16591	FALSE
submucosal	513	Respiratory abnormalities	0.189452	0.249034	1.20859	0.741816	1.96907	0.446808	18053	1212	16841	FALSE
submucosal	287.1	Spontaneous ecchymoses	-0.391025	0.514383	0.676363	0.246791	1.85367	0.447145	16652	1090	15562	FALSE
submucosal	520	Disorders of tooth development	0.329067	0.433013	1.38967	0.594736	3.24713	0.447286	16919	1111	15808	FALSE
submucosal	446.4	Wegener's granulomatosis	0.818287	1.08143	2.26661	0.272172	18.8761	0.449248	16802	1106	15696	FALSE
submucosal	942	Infusion and transfusion reaction	0.563741	0.746626	1.75723	0.406714	7.59225	0.450218	14745	894	13851	FALSE
submucosal	259.2	Carcinoid syndrome	0.567094	0.751648	1.76314	0.404082	7.6931	0.450569	15959	1023	14936	FALSE
submucosal	743.22	Pathologic fracture of femur	0.461014	0.611159	1.58568	0.478616	5.25346	0.450652	16279	1074	15205	FALSE
submucosal	345	Epilepsy, recurrent seizures, convulsions	0.135284	0.180057	1.14486	0.804425	1.62937	0.452448	16549	1095	15454	FALSE
submucosal	426.92	Cardiac defibrillator in situ	0.810686	1.08258	2.24945	0.269506	18.7752	0.453949	13569	858	12711	FALSE
submucosal	711	Arthropathy associated with infections	-0.540926	0.723391	0.582209	0.141032	2.40348	0.454602	16549	1080	15469	FALSE
submucosal	349	Other and unspecified disorders of the nervous system	0.323012	0.432166	1.38128	0.592127	3.22218	0.454807	16174	1066	15108	FALSE
submucosal	225.1	Benign neoplasm of brain, cranial nerves, meninges	-0.314665	0.421033	0.730034	0.319855	1.66622	0.454844	18147	1211	16936	FALSE
submucosal	145	Cancer of mouth	-0.760059	1.01719	0.467639	0.063688	3.43371	0.454936	18275	1223	17052	FALSE
submucosal	428.3	Heart failure with reduced EF [Systolic or combined heart failure]	-0.224208	0.300248	0.799149	0.443661	1.43947	0.455219	17197	1129	16068	FALSE
submucosal	360.2	Progressive myopia	-0.758133	1.01903	0.46854	0.0635817	3.45272	0.456891	16983	1129	15854	FALSE
submucosal	375	Disorders of lacrimal system	-0.382417	0.514488	0.68221	0.248873	1.87008	0.457302	15916	1031	14885	FALSE
submucosal	396	Abnormal heart sounds	0.560393	0.754555	1.75136	0.399104	7.68538	0.457675	16948	1109	15839	FALSE
submucosal	342	Hemiplegia	0.319669	0.43151	1.37667	0.59091	3.2073	0.458807	16176	1066	15110	FALSE
submucosal	567	Peritonitis and retroperitoneal infections	0.189	0.255381	1.20804	0.732313	1.99281	0.459258	15432	958	14474	FALSE
submucosal	290	Delirium dementia and amnestic and other cognitive disorders	0.196248	0.266354	1.21683	0.721945	2.05095	0.461248	17116	1125	15991	FALSE
submucosal	751.2	Congenital anomalies of urinary system	0.24484	0.333094	1.27742	0.664963	2.45396	0.46231	17635	1185	16450	FALSE
submucosal	285.22	Anemia in neoplastic disease	0.170129	0.231563	1.18546	0.752966	1.86636	0.462524	13554	739	12815	FALSE
submucosal	275.53	Disorders of phosphorus metabolism	0.244272	0.332779	1.27669	0.664995	2.45106	0.462927	17231	1132	16099	FALSE
submucosal	8.52	Intestinal infection due to C. difficile	-0.433021	0.592411	0.648547	0.203082	2.07115	0.464812	17875	1188	16687	FALSE
submucosal	134	Helminthiases	0.787757	1.08133	2.19846	0.264044	18.3046	0.466301	18005	1195	16810	FALSE
submucosal	426.31	Right bundle branch block	-0.527505	0.724628	0.590075	0.142591	2.44188	0.466634	13609	859	12750	FALSE
submucosal	155	Cancer of liver and intrahepatic bile duct	-0.73746	1.01688	0.478327	0.0651841	3.51001	0.468317	17265	1127	16138	FALSE
submucosal	278.3	Localized adiposity	0.269507	0.371873	1.30932	0.631685	2.71388	0.468619	13768	854	12914	FALSE
submucosal	597.2	Urinary complications NEC	0.441817	0.610497	1.55553	0.470125	5.14688	0.46925	16770	1105	15665	FALSE
submucosal	282.8	Other hemoglobinopathies	0.436059	0.60518	1.5466	0.472322	5.06428	0.47119	13276	721	12555	FALSE
submucosal	71.1	HIV infection, symptomatic	-0.730507	1.0165	0.481665	0.0656876	3.53189	0.472357	14556	894	13662	FALSE
[truncated: 841 more rows]

## Sheet: ST9. Submucosal Black strata
phenotype	predictor	predictor phecode	beta	SE	OR	LCI	UCI	p	n_total	n_cases	n_controls	Bonferroni-corrected significant?
[truncated: 1,638 more rows]

[truncated: 19 more sheets: ST10. Submucosal Asian strata, ST11. Submucosal subtype subset, ST12. Submucosal AoU, ST13. Intramural primary, ST14. Intramural category count, ST15 Intramural pregnant subset, ST16. Intramural White strata, ST17. Intramural Black strata, ST18. Intramural Asian strata, ST19. Intramural subtype subset, ST20. Intramural AoU, ST21. Subserosal primary, ST22. Subserosal category count, ST23 Subserosal pregnant subset, ST24. Subserosal White strata, ST25. Subserosal Black strata, ST26. Subserosal Asian strata, ST27. Subserosal subtype subset, ST28. Subserosal AoU]
